# Supplementary material for: Comparison of fracture risk using different supplemental doses of vitamin D, calcium or their combination: a network meta-analysis of randomised controlled trials
Source: PubMed Central journal article supplement — BMJ Open. 2019 Oct 16;9(10):e024595. doi: 10.1136/bmjopen-2018-024595 (PMC6797303; doi:10.1136/bmjopen-2018-024595), 2019-10-16

# BMJ Open

BMJ Open is committed to open peer review. As part of this commitment we make the peer review history of every article we publish publicly available.

When an article is published we post the peer reviewers' comments and the authors' responses online. We also post the versions of the paper that were used during peer review. These are the versions that the peer review comments apply to.

The versions of the paper that follow are the versions that were submitted during the peer review process. They are not the versions of record or the final published versions. They should not be cited or distributed as the published version of this manuscript.

BMJ Open is an open access journal and the full, final, typeset and author-corrected version of record of the manuscript is available on our site with no access controls, subscription charges or pay-per-view fees (<http://bmjopen.bmj.com>).

If you have any questions on BMJ Open's open peer review process please email [info.bmjopen@bmj.com](mailto:info.bmjopen@bmj.com)

# BMJ Open

## Comparison of fracture risk using different supplemental doses of vitamin D, calcium or their combination: a network meta-analysis of randomized controlled trials

|                               |                                                                                                                                                                                                                                                                                                                                                                                                                                                                                                                                                                                                                                                                                                                                                                                                                                                                                                                                                                                                                                                                                                                                                                                                                                                                                                                                                                                                                                                                                                                                                                                                                                                                                                                                                                                                                                                                                                                                                                                                                                                                                                                                                                                                                                                                                                                                                |
|-------------------------------|------------------------------------------------------------------------------------------------------------------------------------------------------------------------------------------------------------------------------------------------------------------------------------------------------------------------------------------------------------------------------------------------------------------------------------------------------------------------------------------------------------------------------------------------------------------------------------------------------------------------------------------------------------------------------------------------------------------------------------------------------------------------------------------------------------------------------------------------------------------------------------------------------------------------------------------------------------------------------------------------------------------------------------------------------------------------------------------------------------------------------------------------------------------------------------------------------------------------------------------------------------------------------------------------------------------------------------------------------------------------------------------------------------------------------------------------------------------------------------------------------------------------------------------------------------------------------------------------------------------------------------------------------------------------------------------------------------------------------------------------------------------------------------------------------------------------------------------------------------------------------------------------------------------------------------------------------------------------------------------------------------------------------------------------------------------------------------------------------------------------------------------------------------------------------------------------------------------------------------------------------------------------------------------------------------------------------------------------|
| Journal:                      | <i>BMJ Open</i>                                                                                                                                                                                                                                                                                                                                                                                                                                                                                                                                                                                                                                                                                                                                                                                                                                                                                                                                                                                                                                                                                                                                                                                                                                                                                                                                                                                                                                                                                                                                                                                                                                                                                                                                                                                                                                                                                                                                                                                                                                                                                                                                                                                                                                                                                                                                |
| Manuscript ID                 | bmjopen-2018-024595                                                                                                                                                                                                                                                                                                                                                                                                                                                                                                                                                                                                                                                                                                                                                                                                                                                                                                                                                                                                                                                                                                                                                                                                                                                                                                                                                                                                                                                                                                                                                                                                                                                                                                                                                                                                                                                                                                                                                                                                                                                                                                                                                                                                                                                                                                                            |
| Article Type:                 | Research                                                                                                                                                                                                                                                                                                                                                                                                                                                                                                                                                                                                                                                                                                                                                                                                                                                                                                                                                                                                                                                                                                                                                                                                                                                                                                                                                                                                                                                                                                                                                                                                                                                                                                                                                                                                                                                                                                                                                                                                                                                                                                                                                                                                                                                                                                                                       |
| Date Submitted by the Author: | 11-Jun-2018                                                                                                                                                                                                                                                                                                                                                                                                                                                                                                                                                                                                                                                                                                                                                                                                                                                                                                                                                                                                                                                                                                                                                                                                                                                                                                                                                                                                                                                                                                                                                                                                                                                                                                                                                                                                                                                                                                                                                                                                                                                                                                                                                                                                                                                                                                                                    |
| Complete List of Authors:     | <p>Hu, Zhi-Chao; The Second Affiliated Hospital and Yuying Children's Hospital of Wenzhou Medical University, Second Medical School of Wenzhou Medical University, Wenzhou, Zhejiang, China, Department of Orthopedics</p> <p>Tang, Li; The Second Affiliated Hospital and Yuying Children's Hospital of Wenzhou Medical University, Second Medical School of Wenzhou Medical University, Wenzhou, Zhejiang, China, Department of Orthopedics</p> <p>Li, Xiaobin; The Second Affiliated Hospital and Yuying Children's Hospital of Wenzhou Medical University</p> <p>Zheng, Gang; The Second Affiliated Hospital and Yuying Children's Hospital of Wenzhou Medical University, Second Medical School of Wenzhou Medical University, Wenzhou, Zhejiang, China, Department of Orthopedics</p> <p>Feng, Zhen-Hua; The Second Affiliated Hospital and Yuying Children's Hospital of Wenzhou Medical University, Second Medical School of Wenzhou Medical University, Wenzhou, Zhejiang, China, Department of Orthopedics</p> <p>Tang, Qian; The Second Affiliated Hospital and Yuying Children's Hospital of Wenzhou Medical University, Second Medical School of Wenzhou Medical University, Wenzhou, Zhejiang, China, Department of Orthopedics</p> <p>Xuan, Jiang-Wei; The Second Affiliated Hospital and Yuying Children's Hospital of Wenzhou Medical University, Second Medical School of Wenzhou Medical University, Wenzhou, Zhejiang, China, Department of Orthopedics</p> <p>Shen, Zhi-Hao; Department of Orthopaedics, The Second Affiliated Hospital and Yuying Children's Hospital of Wenzhou Medical University, Wenzhou, Zhejiang, 325027, China.; Hainan Medical College, Haikou, Hainan, China.</p> <p>Ni, Wenfei; 1. Department of Orthopaedics, The Second Affiliated Hospital and Yuying Children's Hospital of Wenzhou Medical University, Wenzhou, Zhejiang, 325027, China. 2. The Second School of Medicine, Wenzhou Medical University, Wenzhou, Zhejiang, 325027, China. 3. Bone Research Institute, The Key Orthopaedic Laboratory of Zhejiang Province, Wenzhou, Zhejiang, 325027, China.,</p> <p>Wu, Ai-Min; The Second Affiliated Hospital and Yuying Children's Hospital of Wenzhou Medical University, Second Medical School of Wenzhou Medical University, Wenzhou, Zhejiang, China, Department of Orthopedics</p> |
| Keywords:                     | Calcium, Vitamin D, Fractures, network meta-analysis                                                                                                                                                                                                                                                                                                                                                                                                                                                                                                                                                                                                                                                                                                                                                                                                                                                                                                                                                                                                                                                                                                                                                                                                                                                                                                                                                                                                                                                                                                                                                                                                                                                                                                                                                                                                                                                                                                                                                                                                                                                                                                                                                                                                                                                                                           |
|                               |                                                                                                                                                                                                                                                                                                                                                                                                                                                                                                                                                                                                                                                                                                                                                                                                                                                                                                                                                                                                                                                                                                                                                                                                                                                                                                                                                                                                                                                                                                                                                                                                                                                                                                                                                                                                                                                                                                                                                                                                                                                                                                                                                                                                                                                                                                                                                |

1  
2  
3  
4  
5  
6  
7  
8  
9  
10  
11  
12  
13  
14  
15  
16  
17  
18  
19  
20  
21  
22  
23  
24  
25  
26  
27  
28  
29  
30  
31  
32  
33  
34  
35  
36  
37  
38  
39  
40  
41  
42  
43  
44  
45  
46  
47  
48  
49  
50  
51  
52  
53  
54  
55  
56  
57  
58  
59  
60

SCHOLARONE™  
Manuscripts

For peer review only

1  
2  
3  
4 **1 Comparison of fracture risk using different supplemental doses of vitamin D, calcium or their**  
5  
6 **2 combination: a network meta-analysis of randomized controlled trials**  
7

8  
9 3 Zhi-Chao Hu<sup>1,2,3</sup>, Li Tang<sup>1,2,3</sup>, Xiao-Bin Li<sup>1,2,3</sup>, Gang Zheng<sup>1,2,3</sup>, Zhen-Hua Feng<sup>1,2,3</sup>, Qian Tang<sup>1,2,3</sup>,  
10  
11 4 Jiang-Wei Xuan<sup>1,2,3</sup>, Zhi-Hao Shen<sup>1,2,3</sup>, Wen-Fei Ni<sup>1,2,3</sup> and Ai-Min Wu<sup>1,2,3,\*</sup>  
12  
13  
14  
15

16 **6 Affiliations:**

- 17  
18 7 1. Department of Orthopaedics, The Second Affiliated Hospital and Yuying Children's Hospital of  
19  
20 8 Wenzhou Medical University, Wenzhou, Zhejiang, 325027, China.  
21  
22 9 2. The Second School of Medicine, Wenzhou Medical University, Wenzhou, Zhejiang, 325027, China.  
23  
24 10 3. Bone Research Institute, The Key Orthopaedic Laboratory of Zhejiang Province, Wenzhou, Zhejiang,  
25  
26 11 325027, China.  
27  
28  
29

30 **12 \*Correspondence author:**

31  
32  
33 13 Ai-Min Wu, email: [aiminwu@wmu.edu.cn](mailto:aiminwu@wmu.edu.cn)  
34

35 14 Ai-Min Wu and Wen-Fei Ni contributed equally to this paper.  
36  
37

38 15 **Phone:** +86 0577 88002814;  
39

40 16 **Fax:** +86 057788002823;  
41  
42  
43  
44  
45  
46  
47  
48  
49  
50  
51  
52  
53  
54  
55  
56  
57  
58  
59  
60

1  
2  
3  
4  
5  
6  
7  
8  
9  
10  
11  
12  
13  
14  
15  
16  
17  
18  
19  
20  
21  
22  
23 **Abstract**

24 **Objective** Inconsistent findings in regard to association between different concentrations of vitamin D,  
25 calcium or their combination and the risk of fracture have been reported during the past decade in  
26 community-dwelling older people. This study was designed to compare the fracture risk using different  
27 concentrations of vitamin D, calcium or their combination.

28 **Design** A systematic review and network meta-analysis.

29 **Data sources** Randomized controlled trials in PubMed, Cochrane library, and EMBASE databases  
30 were systematically searched from the inception dates to December 31, 2017.

31 **Outcomes** Total fracture was defined as the primary outcome. Secondary outcomes were hip fracture  
32 and vertebral fracture. Due to the inconsistency of the original studies, an inconsistency model was  
33 used to pool the confounder-adjusted relative risk (RR).

34 **Results** A total of 29 randomized trials involving 45647 participants fulfilled the inclusion criteria.  
35 There was no evidence that the risk of total fracture was reduced by using different concentrations of  
36 vitamin D, calcium or their combination compared with placebo or no treatment. No significant  
37 associations were found between calcium, vitamin D, or combined calcium and vitamin D supplements  
38 and the incidence of hip, or vertebral fractures.

39 **Conclusions** The use of supplements that included calcium, vitamin D, or both was not found to be  
40 better than placebo or no treatment in terms of risk of fractures among community-dwelling older  
41 adults. It means the routine use of these supplements in community-dwelling older people should be  
42 treated more carefully.

43 **Prospero registration number** CRD42017079624

44 **Keywords:** Calcium; Vitamin D; Fractures; network meta-analysis

#### 45 **Strengths and limitations of this study**

- 46 • This systematic review and meta-analysis combined the evidence from randomized controlled trials
- 47 of total fractures, hip fractures and vertebral fractures in older people, examining association between
- 48 different concentrations of vitamin D, calcium or their combination and the risk of fracture
- 49 • Our findings may not support the routine use of these supplements in community-dwelling older
- 50 people.
- 51 • This work does not necessarily preclude any benefit of vitamin D and calcium supplementation in
- 52 older, frail individuals.
- 53 • Potential missing data and meta-biases, heterogeneity, which may limit the quality of evidence.

#### 54 **Introduction**

55 Clinical fractures of the elderly represent a worldwide public health problem that leads to illness and  
56 social burden. The patients with osteoporosis in the EU were estimated to be 27.5 million in 2010, and  
57 3.5 million new fragility fractures were sustained<sup>1</sup>. In Asia, the average cost of osteoporotic fractures  
58 accounted for 18.95% of the countries' 2014 GDP/capita and increased annually<sup>2-4</sup>. The overall  
59 prevalence of osteoporosis or low bone mass in non-institutional population over the age of 50 in the  
60 USA was estimated at 10.3% and 43.9%, respectively, which means that 10.2 million elderly people  
61 had osteoporosis and 43.4 million people had low bone mass in 2010<sup>5</sup>. With the demographic trend of  
62 ageing and the predicted increase in life expectancy, the cost of fracture treatment is expected to rise.

63 Dietary allowances for calcium range from 700 to 1200 mg/d and vitamin D of 600-800 IU/d have  
64 long been recommended for the prevention of osteoporotic fractures in the elderly<sup>6 7</sup>. The supplements  
65 of calcium and vitamin D are commonly taken to maintain bone health.

66 However, the previous RCTs and meta-analyses concerning vitamin D, calcium, or their combination

1  
2  
3  
4 67 for fractures yielded different efficacy outcomes. For instance, two meta-analyses demonstrated  
5  
6 68 calcium or vitamin D supplementation alone has a small benefit on bone mineral density (BMD), but  
7  
8 69 no clinically important to prevent fractures<sup>8,9</sup>, while an updated meta-analysis and a pooled analysis  
9  
10  
11 70 found calcium plus vitamin D supplementation can significantly reduce hip fractures by 30% and total  
12  
13 71 fractures by 15%<sup>10,11</sup>. Two RCTs reported that low dose of vitamin D supplementation (less than 800  
14  
15 72 IU/d) can reduce the incidence of falls<sup>12</sup> and may prevent fractures without adverse effects<sup>13</sup>, but other  
16  
17  
18 73 RCTs showed no significant reduction in the incidence of hip or other peripheral fractures<sup>14,15</sup> and its  
19  
20  
21 74 possible effects were seen only in patients with initial calcium insufficiency. What's more,  
22  
23 75 Bischoff-Ferrari et al<sup>16</sup> illustrated that high-dose vitamin D supplementation (800 IU/d or higher) not  
24  
25 76 only reduced the risk of falls and hip fractures, but also prevented non-vertebral fractures. In contrast, a  
26  
27  
28 77 study reported annual high-dose oral vitamin D resulted in an increased risk of falls and fractures<sup>17</sup>. On  
29  
30  
31 78 the other hand, low-dose calcium supplementation (less than 800mg/d) effectively led to a sustained  
32  
33 79 reduction in the rate of bone loss<sup>18</sup> and turnover. Although it was also reported that the high dose of  
34  
35 80 calcium (800 mg/d or higher) was associated with a lower risk of clinical fractures<sup>19</sup>. The high-dose  
36  
37  
38 81 calcium with high-dose vitamin D can't prevent fractures according to the evidence from reported RCT  
39  
40 82 <sup>20</sup>, but a meta-analysis supported their combination can prevent bone loss and significantly reduce the  
41  
42  
43 83 risk of hip fractures and all osteoporotic fractures<sup>21</sup>. Thus, it's a challenging to conclude a  
44  
45 84 dose-response relation between the intakes of vitamin D, calcium, or their combination and the main  
46  
47  
48 85 outcomes in these heterogeneous literatures.

49  
50 86 Therefore, this study was designed to compare the fracture risk using different concentrations of  
51  
52 87 vitamin D, calcium or their combination, and comprehensively evaluate the optimal concentration to  
53  
54  
55 88 guide clinical practice and public prevention in community-dwelling older people.

1  
2  
3  
4  
5  
6  
7  
8  
9  
10  
11  
12  
13  
14  
15  
16  
17  
18  
19  
20  
21  
22  
23  
24  
25  
26  
27  
28  
29  
30  
31  
32  
33  
34  
35  
36  
37  
38  
39  
40  
41  
42  
43  
44  
45  
46  
47  
48  
49  
50  
51  
52  
53  
54  
55  
56  
57  
58  
59  
60

89 **Methods**

90 **Search strategy and selection criteria**

91 This review and meta-analysis is based on the Preferred Reporting Items for Systematic Reviews and  
92 Meta-Analysis (PRISMA) extension statement for network meta-analysis. Our meta-analysis was  
93 registered prospectively in PROSPERO (CRD42017079624) and the Checklist PRISMA 2009  
94 (**Supplementary Table 1**) will be used and check our final reports<sup>22</sup>.

95 We restricted our meta-analysis to the inclusion criteria should meet following details: (1) RCTs; (2)  
96 Interventions must be one of the following three: vitamin D only, calcium only, both vitamin D and  
97 calcium; (3) Complete outcome data of fracture; (4) Trials enrolling adults older than 50 years and  
98 living in their communities; Exclusion criteria were (1) Non-randomized trials; (2) Observational and  
99 experimental studies; (3) Case reports, case series, case control studies and reviews; (4) Calcium or  
100 vitamin D combined with other therapies (eg: hormones, exercise); (5) Trials in which vitamin D  
101 analogues (eg: calcitriol) or hydroxylated vitamin D were used; (6) Trials in which dietary intake of  
102 calcium or vitamin D (eg: from milk) was evaluated; (7) Patients suffering from illness or long-term  
103 use of certain drugs affecting the stability of the calcium metabolism, such as metabolic bone disease,  
104 bone tumour and so on.

105 Participants must be randomly assigned to two or more following groups: (1) high calcium (800  
106 mg/d or higher) only; (2) low calcium (less than 800 mg/d) only; (3) high vitamin D (800 IU/d or  
107 higher) only; (4) low vitamin D (less than 800 IU/d) only; (5) high calcium (800 mg/d or higher) + high  
108 vitamin D (800 IU/d or higher); (6) high calcium + low vitamin D (less than 800 IU/d); (7) low calcium  
109 (less than 800 mg/d) + high vitamin D; (8) low calcium + low vitamin D; (9) placebo. The  
110 interventions should be compared with placebo.



1  
2  
3  
4 111 Two authors independently searched the electronic literature database of PubMed, Embase,  
5  
6 112 Cochrane database on December 31, 2017. Related articles and reference lists were searched to avoid  
7  
8 113 original miss. The reference studies of previous systematic reviews, meta-analysis, and included studies  
9  
10  
11 114 were manually searched to avoid initial miss. After 2 authors assessed the potentially eligible studies  
12  
13 115 independently, any disagreement was discussed and resolved with the third independent author.

#### 16 116 **Data collection and assessment of risk of bias**

17  
18 117 Two reviewers independently extracted data, and the third reviewer checked the consistency between  
19  
20 118 them. A standard data extracted form was used at this stage, including the authors, publishing date,  
21  
22  
23 119 country, participant characteristics; doses of calcium, vitamin D, or their combination; dietary calcium  
24  
25 120 intake; baseline serum 25-hydroxyvitamin D concentration; and trial duration. For continuous  
26  
27  
28 121 outcomes, the mean, SD (standard deviation) and participant number will be extracted. For  
29  
30 122 dichotomous outcomes, we extracted the total numbers and the numbers of events of both groups. The  
31  
32  
33 123 data in other forms was recalculated when possible to enable pooled analysis.

34  
35 124 We used the Cochrane risk of bias tool to assess risk bias of included studies. The tool has seven  
36  
37  
38 125 domains including random sequence generation, allocation concealment, blinding of participants and  
39  
40 126 personnel, blinding of outcome assessment, incomplete outcome data, selective reporting and other bias.  
41  
42  
43 127 The classification of the judgment for each domain was low risk of bias, high risk of bias, or unclear  
44  
45 128 risk of bias and two authors independently evaluated the risk of studies.

#### 47 129 **Data synthesis and statistical analysis**

48  
49  
50 130 The data was extracted and input into the STATA software (version 12.0; StataCorp, College Station,  
51  
52 131 TX, USA) for network meta-analysis. And we generated network plots for each outcome to illustrate  
53  
54  
55 132 which interventions had been compared directly in the included studies. Network meta-analysis is an

1  
2  
3  
4 133 extension of standard meta-analysis to compare multiple treatments based on randomized controlled  
5  
6 134 trial evidence, which forms a connected network of comparisons. Treatment effect estimates from  
7  
8 135 network meta-analysis exploit both the direct comparisons within trials and the indirect comparisons  
9  
10  
11 136 across trials. Relative risk (RR) was calculated for dichotomous outcomes while weighted mean  
12  
13 137 difference (WMD) for the continuous both with 95%CI for direct comparisons or 95%CrI for indirect  
14  
15  
16 138 comparisons. Our network was a closed triangular circular network including both direct and indirect  
17  
18 139 evidences. The model (which was proposed by Anna Chaimani, downloaded from [www.mtm.uoi.gr](http://www.mtm.uoi.gr))  
19  
20 140 we used was fit for all kinds of networks. To the only one triangular circular, we used ifplot command  
21  
22  
23 141 proposed by Anna Chaimani to evaluate the consistency of direct and indirect estimates. Then the  
24  
25 142 operational model was chosen according to the inconsistency test, which was the basis of forest maps'  
26  
27  
28 143 calculation. We used the surface under the cumulative ranking probabilities (SUCRA) to indicate which  
29  
30 144 treatment was the best one. The funnel plot was used to identify possible publication bias if the number  
31  
32  
33 145 of studies was larger than 10.

#### 34 35 146 **Patient and public involvement**

36  
37 147 No patients were involved in setting the research question or the outcome measures, and no patients  
38  
39  
40 148 were involved in developing plans for design or implementation of the study. Furthermore, no patients  
41  
42  
43 149 were asked to advice on interpretation or writing up of results. Since this meta-analysis used  
44  
45 150 aggregated data from previous trials, it is unable to disseminate the results of the research to study  
46  
47  
48 151 participants directly.

#### 49 50 152 **Result**

##### 51 52 153 **Data Retrieval**

53  
54  
55 154 In summary, a total of 7909 potential records were initially identified through PubMed (5187),  
56  
57

1  
2  
3  
4 155 Embase (2688), Cochrane Data base (34). Based on our review of the title and abstract, 99 full-text  
5  
6 156 papers were reviewed and 29 studies met inclusion criteria (**Figure 1**).

### 8 157 **Study and Patient Characteristics**

10 158 The characteristics of all 29 included studies were summarized and shown in **supplementary Table**

12  
13 159 **2**. And the detailed data of outcomes was collected in **supplementary Table 3**. The papers had similar

14  
15 160 distributions of sex, age, country, intervention and all of them were community-dwelling older people.

16  
17 161 Hansson et al<sup>23</sup> did not report the residential status of participants, although a previous meta-analysis

18  
19 162 classified this status as community<sup>24</sup>. The trial by Hansson et al<sup>23</sup> was included, but a sensitivity

20  
21 163 analysis was performed that excluded that trial (**supplementary Figure 1**). Inkovaara et al<sup>25</sup> did not

22  
23 164 report whether the data represent the number of fractures or participants with fracture. The trial by

24  
25 165 Massart et al<sup>26</sup> was included, which adult maintenance hemodialysis patients were the participants. We

26  
27 166 suspected that the maintenance hemodialysis or the underlying disease might result in the imbalance of

28  
29 167 calcium in the body. Patients on haemodialysis may also be receiving 1,25-dihydroxyvitamin D, which

30  
31 168 may affect their response to vitamin D supplementation. The data were included, but a sensitivity

32  
33 169 analysis was performed that excluded both of two trials (**supplementary Figure 2**).

34  
35 170 **supplementary Figure 3 and supplementary Figure 4** showed the assessment of the risk of bias.

36  
37 171 All studies were randomized; 21 were double-blind, placebo-controlled trials; 16 trials described an

38  
39 172 adequate random sequence generation process; and 13 trials described the methods used for allocation

40  
41 173 concealment. Only one study showed low quality<sup>25</sup>, so we also made a sensitivity analysis by excluding

42  
43 174 that trial (**supplementary Figure 2**). No obvious publication bias was reported according to the

44  
45 175 **supplementary Figure 5, supplementary Figure 6 and supplementary Figure 7**.

46  
47 176 **Primary outcome: total fracture**

1  
2  
3  
4 177 For estimating the vitamin D, calcium or their combination efficacy against total fractures, we  
5  
6 178 looked at data from 27102 individuals from 22 studies. Pooled estimates included 18 studies with one  
7  
8 179 treatment, 1 study with two treatments, and 3 studies with three treatments.

10  
11 180 The inconsistency between direct and indirect evidence based on both comparisons of consistency  
12  
13 181 and inconsistency model was found according to inconsistency test (**supplementary Figure 8**), so we  
14  
15 182 adopted an inconsistency model to deal with this problem.

17  
18 183 The network plot of comparisons on total fractures was shown in **Figure 2A**. The forest plot for the  
19  
20 184 network meta-analysis was shown in **Figure 3A**. We also made ranking graph of distribution of  
21  
22 185 probabilities on total fractures in **supplementary Figure 9**. The direct and indirect comparisons  
23  
24 186 indicated no differences among the vitamin D, calcium or their combination that remained in the main  
25  
26 187 network. Neither do the statistical differences between interventions and placebo. Based on SUCRA,  
27  
28 188 high calcium plus low vitamin D group (0.726) ranked the first, the second was high calcium plus high  
29  
30 189 vitamin D group (0.642) and the last was low calcium plus high vitamin D group (0.217). In a separate  
31  
32 190 sensitivity analysis, we excluded Inkovaara's <sup>25</sup> and Massart's <sup>26</sup> studies (**supplementary Figure 2**).  
33  
34 191 However, there was still no significant association of vitamin D, calcium or their combination with  
35  
36 192 total fracture.

### 193 **Secondary outcomes: hip fracture and vertebral fracture**

37  
38  
39  
40  
41  
42 194 A total of 42531 individuals were included from 17 studies for evaluate the drug efficacy against hip  
43  
44 195 fractures. Pooled estimates included 14 studies with one treatment, 1 study with two treatments, and  
45  
46 196 two studies with three treatments.

47  
48  
49  
50  
51  
52 197 We adopted an inconsistency model to deal with this problem according to inconsistency test  
53  
54 198 (**supplementary Figure 10**). The network plot of comparisons on hip fractures was shown in **Figure**

1  
2  
3  
4 199 **2B.** The forest plot for the network meta-analysis was shown in **Figure 3B**. We also made ranking  
5  
6 200 graph of distribution of probabilities on hip fractures in **supplementary Figure 11**. The direct and  
7  
8 201 indirect comparisons indicated no differences among the vitamin D, calcium or their combination that  
9  
10 202 remained in the main network. Neither do the statistical differences between drug experimental groups  
11  
12 203 and placebo. Based on SUCRA, high calcium plus high vitamin D group (0.791) ranked the first, the  
13  
14 204 second was placebo or no treatment group (0.6753) and the last was high calcium group (0.198).

15  
16  
17  
18 205 A total of 17612 individuals were collected from 12 studies involving vertebral fractures. Pooled  
19  
20 206 estimates included 10 studies with one treatment, and two studies with three treatments.

21  
22  
23 207 We adopted an inconsistency model to deal with this problem according to inconsistency test  
24  
25 208 (**supplementary Figure 12**). The network plot of comparisons on vertebral fractures was shown in  
26  
27  
28 209 **Figure 2C**. The forest plot for the network meta-analysis was shown in **Figure 3C**. We also made  
29  
30 210 ranking graph of distribution of probabilities on vertebral fractures in **supplementary Figure 13**. The  
31  
32 211 direct and indirect comparisons indicated no differences among the vitamin D, calcium or their  
33  
34 212 combination that remained in the main network. Neither do the statistical differences between drug  
35  
36 213 experimental groups and placebo. Based on SUCRA, high calcium plus high vitamin D group (0.825)  
37  
38 214 ranked the first, the second was high calcium group (0.649) and the last was high vitamin D group  
39  
40 215 (0.186). In a separate sensitivity analysis, we excluded Hansson's study<sup>23</sup> (**supplementary Figure 1**).  
41  
42 216 However, there was still no significant association of vitamin D, calcium or their combination with  
43  
44 217 total fracture.

## 45 218 **Discussion**

46  
47  
48 219 Vitamin D supplementation and calcium are suggested as interventions to treat and prevent fracture.  
49  
50 220 We found the previous meta-analyses and RCTs are critically inconsistent in efficacy of different doses  
51  
52  
53  
54  
55  
56

1  
2  
3  
4 221 of vitamin D with calcium on fractures.

5  
6 222 Results of this meta-analysis showed that calcium, calcium plus vitamin D, and vitamin D  
7  
8 223 supplementation alone were not significantly associated with a lower incidence of hip, vertebral, or  
9  
10 224 total fractures in community-dwelling older adults. Sensitivity analyses that excluded low-quality trials  
11  
12 225 and studies that exclusively enrolled patients with particular medical conditions did not alter these  
13  
14 226 results.

15  
16  
17  
18 227 A meta-analysis conducted by Jia-Guo Zhao et al<sup>27</sup> showed that no significant difference was found  
19  
20 228 in the incidence of hip or other fractures, which was similar to our result. However, it did not focus on  
21  
22 229 the effect of different concentrations of vitamin D, calcium or their combination and we supposed that  
23  
24 230 a network meta-analysis might be more reasonable. And in this meta-analysis the participants of the  
25  
26 231 included study reported by Massart<sup>26</sup> were adult maintenance hemodialysis patients, which may  
27  
28 232 resulted in the imbalance of calcium in the body. Patients on haemodialysis may also be receiving  
29  
30 233 1,25-dihydroxyvitamin D, which may affect their response to vitamin D supplementation. And we  
31  
32 234 suspected that a network meta-analysis might be a more suitable choice concerning all these different  
33  
34 235 interventions mixed.

35  
36  
37  
38 236 Bischoff-Ferrari et al<sup>28</sup> reported that high-dose vitamin D supplementation (800 IU/d or higher)  
39  
40 237 played an important role in the reduction of the risk of falls and hip fractures, as well as prevented  
41  
42 238 non-vertebral fractures in adults 65 years or older. However, their findings may have been influenced  
43  
44 239 by the trial of Chapuy et al<sup>29</sup>, which only enrolled participants living in an institution. What's more,  
45  
46 240 differences in conclusions of previous meta-analyses and the current meta-analysis were due to the  
47  
48 241 recently published trials which reported neutral or harmful associations of vitamin D supplementation  
49  
50 242 and fracture incidence more and more. Study findings here indicated that vitamin D might result in a  
51  
52  
53  
54  
55  
56  
57  
58  
59  
60

1  
2  
3  
4 243 higher risk for hip fracture, but this conclusion did not reach statistical significance. This finding may  
5  
6 244 be attributable to lack of statistical power in this meta-analysis.

7  
8 245 However, possible limitations of this study protocol include potential missing data and meta-biases,  
9  
10 246 heterogeneity, which may limit the quality of evidence. Some RCTs were of poor quality and, for  
11  
12 247 example, used unclear allocation concealment. So we made a sensitivity analysis by excluding  
13  
14 248 low-quality trials. And some study characteristics such as sex, baseline serum 25-hydroxyvitamin D  
15  
16 249 concentrations, duration of follow-up, performance bias and detection bias might be potential obstacles  
17  
18 250 to the outcomes of our article, but we performed some subgroup analyses before statistical analysis and  
19  
20 251 found no statistical differences between these subgroups. What's more, we combined bolus dosing by  
21  
22 252 injection with oral supplements taken daily/monthly/yearly, which might have different effects on  
23  
24 253 vitamin D status in the body. In addition, this work does not necessarily preclude any benefit of vitamin  
25  
26 254 D and calcium supplementation in older, frail individuals.

### 27 28 29 30 31 32 33 255 **Conclusions**

34  
35 256 In this meta-analysis of randomized clinical trials, we found that the use of different concentrations of  
36  
37 257 vitamin D, calcium or their combination in community-dwelling older adults was not associated with a  
38  
39 258 lower risk of fractures. Our findings may not support the routine use of these supplements in  
40  
41 259 community-dwelling older people.

### 42 43 44 45 260 **Contributors**

46  
47 261 ZCH and AMW conceived the study. The search strategy was developed by LT and XBL. ZHF, GZ  
48  
49 262 and QT will complete electronic search, select publications and assess their eligibility. ZHS and XBL  
50  
51 263 will extract information of the included studies after screening. JWX will check the data entry for  
52  
53 264 accuracy and completeness. ZCH and LT will give advice for data analysis and presentation of study  
54  
55  
56  
57  
58  
59  
60

1  
2  
3  
4 265 result. WFN and AMW supervised the overall conduct of the study. All the authors drafted and  
5  
6 266 critically reviewed and approved the final manuscript.  
7

#### 8 267 **Funds and Acknowledgement**

9  
10 268 This work was funded by the National Natural Science Foundation of China (81501933, 81572214),  
11  
12  
13 269 Zhejiang Provincial Natural Science Foundation of China (LY14H060008), Zhejiang Provincial  
14  
15  
16 270 Medical Technology Foundation of China (2018254309, 2015111494), Wenzhou leading talent  
17  
18 271 innovative project (RX2016004) and Wenzhou Municipal Science and Technology Bureau  
19  
20 272 (Y20170389). The funders had no role in the design, execution, or writing of the study.  
21  
22

#### 23 273 **Conflicts of interest**

24  
25 274 None declared  
26  
27

#### 28 275 **Patient consent**

29  
30 276 Not required.  
31  
32

#### 33 277 **Provenance and peer review**

34  
35 278 Not commissioned; externally peer reviewed.  
36  
37

#### 38 279 **Data sharing statement**

39  
40 280 No additional data are available.  
41  
42

#### 43 281 **References**

- 44 282 1. Svedbom A, Hernlund E, Ivergard M, et al. Osteoporosis in the European Union: a compendium of  
45 283 country-specific reports. *Arch Osteoporos* 2013;8:137. doi: 10.1007/s11657-013-0137-0  
46 284 2. Mohd-Tahir NA, Li SC. Economic burden of osteoporosis-related hip fracture in Asia: a systematic  
47 285 review. *Osteoporos Int* 2017;28(7):2035-44. doi: 10.1007/s00198-017-3985-4  
48 286 3. Kim J, Lee E, Kim S, et al. Economic Burden of Osteoporotic Fracture of the Elderly in South Korea: A  
49 287 National Survey. *Value Health Reg Issues* 2016;9:36-41. doi: 10.1016/j.vhri.2015.09.007  
50 288 4. Qu B, Ma Y, Yan M, et al. The economic burden of fracture patients with osteoporosis in western  
51 289 China. *Osteoporos Int* 2014;25(7):1853-60. doi: 10.1007/s00198-014-2699-0  
52 290 5. Wright NC, Looker AC, Saag KG, et al. The recent prevalence of osteoporosis and low bone mass in  
53 291 the United States based on bone mineral density at the femoral neck or lumbar spine. *J Bone*



- 1  
2  
3 292 *Miner Res* 2014;29(11):2520-6. doi: 10.1002/jbmr.2269
- 4 293 6. Consensus conference: Osteoporosis. *JAMA* 1984;252(6):799-802.
- 5 294 7. Ross AC. The 2011 report on dietary reference intakes for calcium and vitamin D. *Public Health Nutr*
- 6 295 2011;14(5):938-9. doi: 10.1017/S1368980011000565
- 7  
8 296 8. Shea B, Wells G, Cranney A, et al. Meta-analyses of therapies for postmenopausal osteoporosis. VII.
- 9 297 Meta-analysis of calcium supplementation for the prevention of postmenopausal
- 10 298 osteoporosis. *Endocr Rev* 2002;23(4):552-9. doi: 10.1210/er.2001-7002
- 11 299 9. Reid IR, Bolland MJ, Grey A. Effects of vitamin D supplements on bone mineral density: a systematic
- 12 300 review and meta-analysis. *Lancet (London, England)* 2014;383(9912):146-55. doi:
- 13 301 10.1016/s0140-6736(13)61647-5 [published Online First: 2013/10/15]
- 14 302 10. Weaver CM, Alexander DD, Boushey CJ, et al. Calcium plus vitamin D supplementation and risk of
- 15 303 fractures: an updated meta-analysis from the National Osteoporosis Foundation. *Osteoporos*
- 16 304 *Int* 2016;27(1):367-76. doi: 10.1007/s00198-015-3386-5
- 17  
18 305 11. Group D. Patient level pooled analysis of 68 500 patients from seven major vitamin D fracture trials
- 19 306 in US and Europe. *BMJ* 2010;340:b5463. doi: 10.1136/bmj.b5463
- 20 307 12. Flicker L, MacInnis RJ, Stein MS, et al. Should older people in residential care receive vitamin D to
- 21 308 prevent falls? Results of a randomized trial. *Journal of the American Geriatrics Society*
- 22 309 2005;53(11):1881-8. doi: 10.1111/j.1532-5415.2005.00468.x [published Online First:
- 23 310 2005/11/09]
- 24 311 13. Trivedi DP, Doll R, Khaw KT. Effect of four monthly oral vitamin D3 (cholecalciferol)
- 25 312 supplementation on fractures and mortality in men and women living in the community:
- 26 313 randomised double blind controlled trial. *BMJ (Clinical research ed)* 2003;326(7387):469. doi:
- 27 314 10.1136/bmj.326.7387.469 [published Online First: 2003/03/01]
- 28 315 14. Lyons RA, Johansen A, Brophy S, et al. Preventing fractures among older people living in
- 29 316 institutional care: a pragmatic randomised double blind placebo controlled trial of vitamin D
- 30 317 supplementation. *Osteoporosis international : a journal established as result of cooperation*
- 31 318 *between the European Foundation for Osteoporosis and the National Osteoporosis*
- 32 319 *Foundation of the USA* 2007;18(6):811-8. doi: 10.1007/s00198-006-0309-5 [published Online
- 33 320 First: 2007/05/03]
- 34 321 15. Law M, Withers H, Morris J, et al. Vitamin D supplementation and the prevention of fractures and
- 35 322 falls: results of a randomised trial in elderly people in residential accommodation. *Age and*
- 36 323 *ageing* 2006;35(5):482-6. doi: 10.1093/ageing/afj080 [published Online First: 2006/04/28]
- 37 324 16. Bischoff-Ferrari HA, Willett WC, Wong JB, et al. Prevention of nonvertebral fractures with oral
- 38 325 vitamin D and dose dependency: a meta-analysis of randomized controlled trials. *Archives of*
- 39 326 *internal medicine* 2009;169(6):551-61. doi: 10.1001/archinternmed.2008.600 [published
- 40 327 Online First: 2009/03/25]
- 41 328 17. Sanders KM, Stuart AL, Williamson EJ, et al. Annual high-dose oral vitamin D and falls and fractures
- 42 329 in older women: a randomized controlled trial. *Jama* 2010;303(18):1815-22. doi:
- 43 330 10.1001/jama.2010.594 [published Online First: 2010/05/13]
- 44 331 18. Nakamura K, Saito T, Kobayashi R, et al. Effect of low-dose calcium supplements on bone loss in
- 45 332 perimenopausal and postmenopausal Asian women: a randomized controlled trial. *J Bone*
- 46 333 *Miner Res* 2012;27(11):2264-70. doi: 10.1002/jbmr.1676
- 47 334 19. Prince RL, Devine A, Dhaliwal SS, et al. Effects of calcium supplementation on clinical fracture and
- 48 335 bone structure: results of a 5-year, double-blind, placebo-controlled trial in elderly women.

- 1  
2  
3 336 *Archives of internal medicine* 2006;166(8):869-75. doi: 10.1001/archinte.166.8.869  
4 337 [published Online First: 2006/04/26]  
5 338 20. Salovaara K, Tuppurainen M, Karkkainen M, et al. Effect of vitamin D(3) and calcium on fracture  
6 339 risk in 65- to 71-year-old women: a population-based 3-year randomized, controlled trial--the  
7 340 OSTPRE-FPS. *Journal of bone and mineral research : the official journal of the American*  
8 341 *Society for Bone and Mineral Research* 2010;25(7):1487-95. doi: 10.1002/jbmr.48 [published  
9 342 Online First: 2010/03/05]  
10 343 21. Boonen S, Lips P, Bouillon R, et al. Need for additional calcium to reduce the risk of hip fracture  
11 344 with vitamin d supplementation: evidence from a comparative metaanalysis of randomized  
12 345 controlled trials. *The Journal of clinical endocrinology and metabolism* 2007;92(4):1415-23.  
13 346 doi: 10.1210/jc.2006-1404 [published Online First: 2007/02/01]  
14 347 22. Moher D, Liberati A, Tetzlaff J, et al. Preferred reporting items for systematic reviews and  
15 348 meta-analyses: the PRISMA statement. *PLoS Med* 2009;6(7):e1000097. doi:  
16 349 10.1371/journal.pmed.1000097  
17 350 23. Hansson T, Roos B. The effect of fluoride and calcium on spinal bone mineral content: a controlled,  
18 351 prospective (3 years) study. *Calcified tissue international* 1987;40(6):315-7. [published Online  
19 352 First: 1987/06/01]  
20 353 24. Bolland MJ, Leung W, Tai V, et al. Calcium intake and risk of fracture: systematic review. *BMJ*  
21 354 *(Clinical research ed)* 2015;351:h4580. doi: 10.1136/bmj.h4580 [published Online First:  
22 355 2015/10/01]  
23 356 25. Inkovaara J, Gothoni G, Halttula R. Calcium, vitamin D and anabolic steroid in treatment of aged  
24 357 bones: Double-blind placebo-controlled long-term clinical trial. *Age and ageing*  
25 358 1983;12(2):124-30.  
26 359 26. Massart A, Debelles FD, Racape J, et al. Biochemical parameters after cholecalciferol repletion in  
27 360 hemodialysis: results From the VitaDial randomized trial. *American journal of kidney diseases :*  
28 361 *the official journal of the National Kidney Foundation* 2014;64(5):696-705. doi:  
29 362 10.1053/j.ajkd.2014.04.020 [published Online First: 2014/05/27]  
30 363 27. Zhao JG, Zeng XT, Wang J, et al. Association Between Calcium or Vitamin D Supplementation and  
31 364 Fracture Incidence in Community-Dwelling Older Adults: A Systematic Review and  
32 365 Meta-analysis. *Jama* 2017;318(24):2466-82. doi: 10.1001/jama.2017.19344 [published Online  
33 366 First: 2017/12/28]  
34 367 28. Bischoff-Ferrari HA, Willett WC, Orav EJ, et al. A pooled analysis of vitamin D dose requirements  
35 368 for fracture prevention. *The New England journal of medicine* 2012;367(1):40-9. doi:  
36 369 10.1056/NEJMoa1109617 [published Online First: 2012/07/06]  
37 370 29. Chapuy MC, Arlot ME, Duboeuf F, et al. Vitamin D3 and calcium to prevent hip fractures in elderly  
38 371 women. *The New England journal of medicine* 1992;327(23):1637-42. doi:  
39 372 10.1056/nejm199212033272305 [published Online First: 1992/12/03]  
40  
41  
42  
43  
44  
45  
46  
47  
48  
49 373

50  
51  
52  
53 374 **Figure 1.** The selection of literature for included studies.  
54  
55  
56  
57  
58  
59  
60

1  
2  
3  
4 375 **Figure 2.** The network plot of comparisons on total fractures (A), hip fractures (B) and vertebral  
5  
6 376 fractures (C). A=high calcium (800 mg/d or higher); B=low calcium (less than 800 mg/d); C=high  
7  
8 377 vitamin D (800 IU/d or higher); D=low vitamin D (less than 800 IU/d)  
9

10  
11  
12  
13 378 **Figure 3.** The forest plot for the risk of total fractures (A), hip fractures (B) and vertebral fractures (C).  
14  
15 379 A=high calcium (800 mg/d or higher); B=low calcium (less than 800 mg/d); C=high vitamin D (800  
16  
17 380 IU/d or higher); D=low vitamin D (less than 800 IU/d)  
18  
19  
20  
21  
22

23 381 **supplementary Figure 1.** A sensitivity analysis excluded the trial of Hansson et al. A=high calcium  
24  
25 382 (800 mg/d or higher); B=low calcium (less than 800 mg/d); C=high vitamin D (800 IU/d or higher);  
26  
27 383 D=low vitamin D (less than 800 IU/d)  
28  
29  
30  
31  
32

33 384 **supplementary Figure 2.** A sensitivity analysis excluded the trial of Inkovaara et al. A=high calcium  
34  
35 385 (800 mg/d or higher); B=low calcium (less than 800 mg/d); C=high vitamin D (800 IU/d or higher);  
36  
37 386 D=low vitamin D (less than 800 IU/d)  
38  
39  
40  
41  
42

43 387 **supplementary Figure 3.** Risk of Bias Assessment of All Included Studies  
44  
45  
46  
47

48 388 **supplementary Figure 4.** Risk of Bias Assessment of All Included Studies  
49  
50  
51

52 389 **supplementary Figure 5.** Publication bias for the total fractures. A=high calcium (800 mg/d or higher);  
53  
54 390 B=low calcium (less than 800 mg/d); C=high vitamin D (800 IU/d or higher); D=low vitamin D (less  
55  
56  
57  
58  
59  
60

1  
2  
3  
4 391 than 800 IU/d)  
5  
6  
7

8 392 **supplementary Figure 6.** Publication bias for the hip fractures. A=high calcium (800 mg/d or higher);  
9

10 393 B=low calcium (less than 800 mg/d); C=high vitamin D (800 IU/d or higher); D=low vitamin D (less  
11  
12

13 394 than 800 IU/d)  
14  
15  
16  
17

18 395 **supplementary Figure 7.** Publication bias for the vertebral fractures. A=high calcium (800 mg/d or  
19

20 396 higher); B=low calcium (less than 800 mg/d); C=high vitamin D (800 IU/d or higher); D=low vitamin  
21  
22

23 397 D (less than 800 IU/d)  
24  
25  
26  
27

28 398 **supplementary Figure 8.** Inconsistency test for the total fractures. A=high calcium (800 mg/d or  
29

30 399 higher); B=low calcium (less than 800 mg/d); C=high vitamin D (800 IU/d or higher); D=low vitamin  
31  
32

33 400 D (less than 800 IU/d)  
34  
35  
36  
37

38 401 **supplementary Figure 9.** Ranking graph of distribution of probabilities for total fractures. A=high  
39

40 402 calcium (800 mg/d or higher); B=low calcium (less than 800 mg/d); C=high vitamin D (800 IU/d or  
41  
42

43 403 higher); D=low vitamin D (less than 800 IU/d)  
44  
45  
46  
47

48 404 **supplementary Figure 10.** Inconsistency test for the hip fractures. A=high calcium (800 mg/d or  
49

50 405 higher); B=low calcium (less than 800 mg/d); C=high vitamin D (800 IU/d or higher); D=low vitamin  
51  
52

53 406 D (less than 800 IU/d)  
54  
55  
56  
57

1  
2  
3  
4 407 **supplementary Figure 11.** Ranking graph of distribution of probabilities for hip fractures. A=high  
5  
6 408 calcium (800 mg/d or higher); B=low calcium (less than 800 mg/d); C=high vitamin D (800 IU/d or  
7  
8 409 higher); D=low vitamin D (less than 800 IU/d)  
9

10  
11  
12  
13 410 **supplementary Figure 12.** Inconsistency test for the vertebral fractures. A=high calcium (800 mg/d or  
14  
15 411 higher); B=low calcium (less than 800 mg/d); C=high vitamin D (800 IU/d or higher); D=low vitamin  
16  
17 412 D (less than 800 IU/d)  
18  
19

20  
21  
22  
23 413 **supplementary Figure 13.** Ranking graph of distribution of probabilities for vertebral fractures.  
24  
25 414 A=high calcium (800 mg/d or higher); B=low calcium (less than 800 mg/d); C=high vitamin D (800  
26  
27 415 IU/d or higher); D=low vitamin D (less than 800 IU/d)  
28  
29  
30  
31  
32  
33  
34  
35  
36  
37  
38  
39  
40  
41  
42  
43  
44  
45  
46  
47  
48  
49  
50  
51  
52  
53  
54  
55  
56  
57  
58  
59  
60

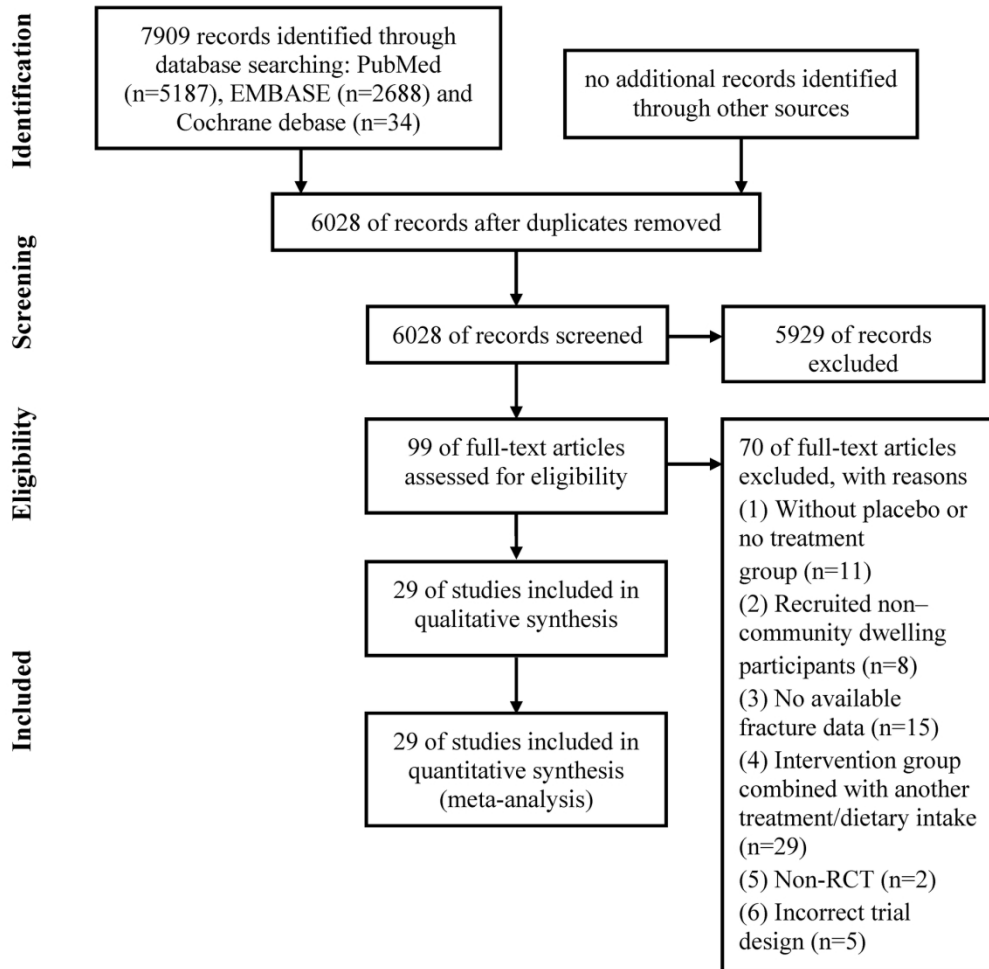

The selection of literature for included studies

168x168mm (300 x 300 DPI)

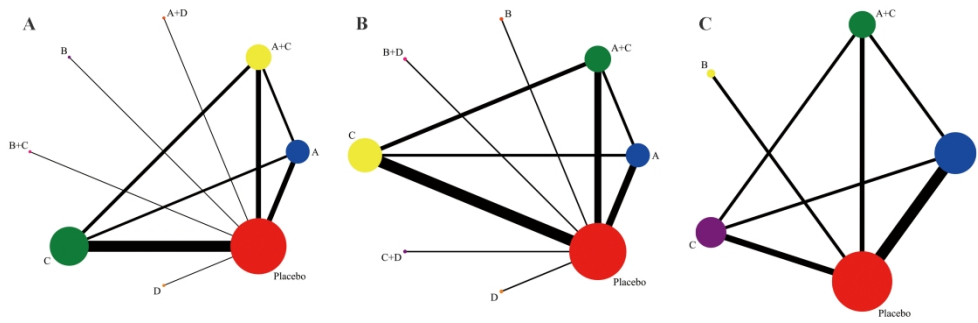

The network plot of comparisons on total fractures (A), hip fractures (B) and vertebral fractures (C). A=high calcium (800 mg/d or higher) ; B=low calcium (less than 800 mg/d) ; C=high vitamin D (800 IU/d or higher) ; D=low vitamin D (less than 800 IU/d)

1363x443mm (72 x 72 DPI)

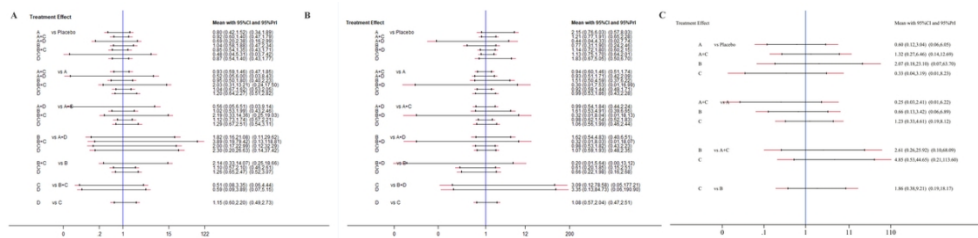

The forest plot for the risk of total fractures (A), hip fractures (B) and vertebral fractures (C). A=high calcium (800 mg/d or higher) ; B=low calcium (less than 800 mg/d) ; C=high vitamin D (800 IU/d or higher) ; D=low vitamin D (less than 800 IU/d)

110x27mm (300 x 300 DPI)



1  
2  
3  
4  
5  
6  
7  
8  
9  
10  
11  
12  
13  
14  
15  
16  
17  
18  
19  
20  
21  
22  
23  
24  
25  
26  
27  
28  
29  
30  
31  
32  
33  
34  
35  
36  
37  
38  
39  
40  
41  
42  
43  
44  
45  
46  
47  
48  
49  
50  
51  
52  
53  
54  
55  
56  
57  
58  
59  
60

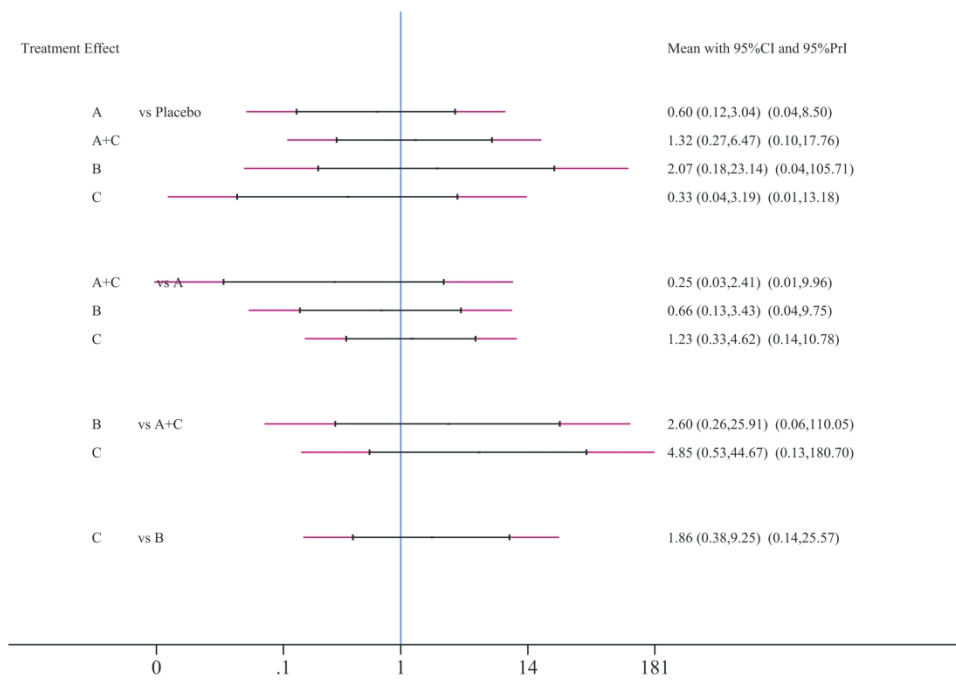

101x73mm (600 x 600 DPI)

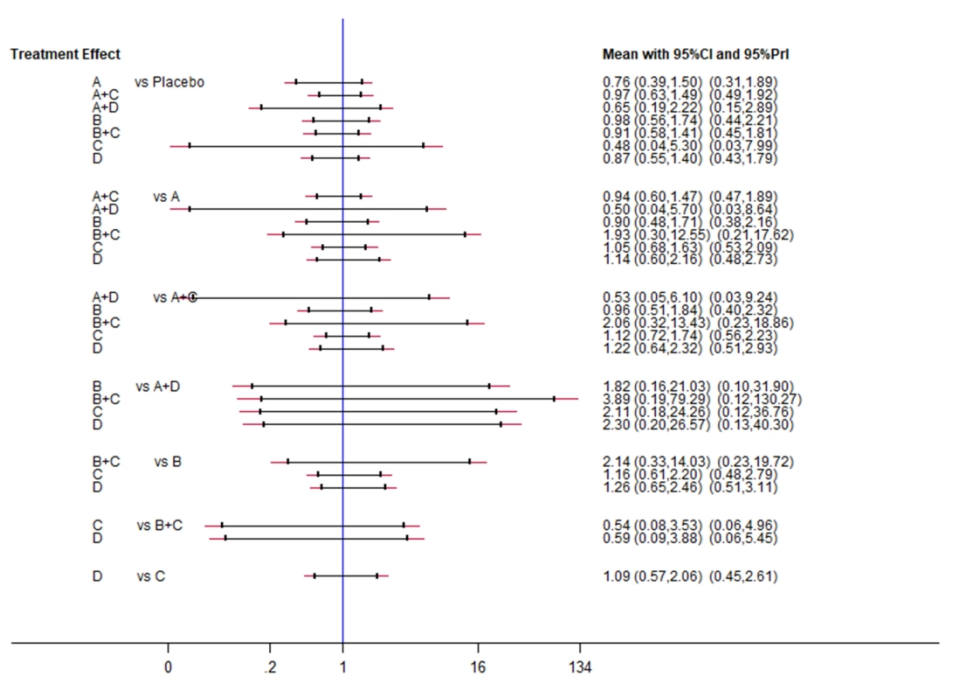

84x60mm (600 x 600 DPI)

1  
2  
3  
4  
5  
6  
7  
8  
9  
10  
11  
12  
13  
14  
15  
16  
17  
18  
19  
20  
21  
22  
23  
24  
25  
26  
27  
28  
29  
30  
31  
32  
33  
34  
35  
36  
37  
38  
39  
40  
41  
42  
43  
44  
45  
46  
47  
48  
49  
50  
51  
52  
53  
54  
55  
56  
57  
58  
59  
60

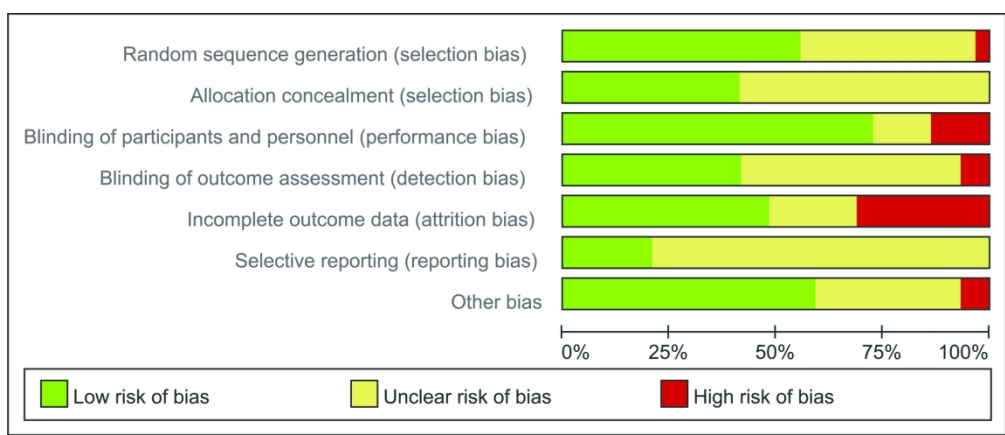

82x34mm (600 x 600 DPI)

1  
2  
3  
4  
5  
6  
7  
8  
9  
10  
11  
12  
13  
14  
15  
16  
17  
18  
19  
20  
21  
22  
23  
24  
25  
26  
27  
28  
29  
30  
31  
32  
33  
34  
35  
36  
37  
38  
39  
40  
41  
42  
43  
44  
45  
46  
47  
48  
49  
50  
51  
52  
53  
54  
55  
56  
57  
58  
59  
60

|                           | Random sequence generation (selection bias) | Allocation concealment (selection bias) | Blinding of participants and personnel (performance bias) | Blinding of outcome assessment (detection bias) | Incomplete outcome data (attrition bias) | Selective reporting (reporting bias) | Other bias |
|---------------------------|---------------------------------------------|-----------------------------------------|-----------------------------------------------------------|-------------------------------------------------|------------------------------------------|--------------------------------------|------------|
| Avenell et al, 2004       | +                                           | +                                       | ?                                                         | +                                               | +                                        | ?                                    | ?          |
| Baron et al, 1999         | +                                           | ?                                       | +                                                         | +                                               | +                                        | ?                                    | +          |
| Dawson-Hughes et al, 1997 | ?                                           | ?                                       | +                                                         | +                                               | ?                                        | ?                                    | ?          |
| Glendenning et al, 2012   | +                                           | +                                       | +                                                         | +                                               | +                                        | ?                                    | +          |
| Grant et al, 2005         | +                                           | +                                       | ?                                                         | +                                               | ?                                        | +                                    | +          |
| Hansson and Roos, 1987    | ?                                           | ?                                       | ?                                                         | ?                                               | ?                                        | ?                                    | ?          |
| Harwood et al, 2004       | +                                           | +                                       | +                                                         | +                                               | +                                        | ?                                    | ?          |
| Hin et al, 2017           | +                                           | ?                                       | +                                                         | +                                               | +                                        | +                                    | +          |
| Inkovaara et al, 1983     | +                                           | ?                                       | ?                                                         | ?                                               | +                                        | ?                                    | ?          |
| Jackson et al, 2006       | ?                                           | ?                                       | +                                                         | +                                               | +                                        | ?                                    | +          |
| Lips et al, 1996          | +                                           | +                                       | ?                                                         | ?                                               | +                                        | ?                                    | +          |
| Liu et al, 2015           | ?                                           | ?                                       | +                                                         | ?                                               | +                                        | ?                                    | +          |
| Massart et al, 2014       | +                                           | ?                                       | +                                                         | ?                                               | +                                        | +                                    | +          |
| Mitri et al, 2011         | +                                           | ?                                       | ?                                                         | ?                                               | +                                        | ?                                    | +          |
| Peacock et al, 2000       | ?                                           | ?                                       | ?                                                         | ?                                               | +                                        | ?                                    | ?          |
| Porthouse et al, 2005     | ?                                           | +                                       | +                                                         | +                                               | +                                        | ?                                    | +          |
| Prince et al, 2006        | +                                           | +                                       | ?                                                         | ?                                               | +                                        | ?                                    | +          |
| Punthakee et al, 2012     | +                                           | ?                                       | ?                                                         | ?                                               | +                                        | +                                    | +          |
| Recker et al, 1996        | ?                                           | ?                                       | +                                                         | +                                               | +                                        | ?                                    | ?          |
| Reid et al, 1993          | ?                                           | ?                                       | +                                                         | ?                                               | ?                                        | ?                                    | +          |
| Reid et al, 2006          | ?                                           | +                                       | +                                                         | ?                                               | ?                                        | ?                                    | +          |
| Riggs et al, 1998         | ?                                           | ?                                       | ?                                                         | ?                                               | +                                        | ?                                    | ?          |
| Salovaara et al, 2010     | +                                           | ?                                       | +                                                         | ?                                               | ?                                        | ?                                    | ?          |
| Sanders et al, 2010       | +                                           | +                                       | +                                                         | +                                               | +                                        | ?                                    | +          |
| Smith et al, 2007         | ?                                           | +                                       | +                                                         | +                                               | +                                        | ?                                    | +          |
| Trivedi et al, 2003       | ?                                           | +                                       | +                                                         | +                                               | +                                        | ?                                    | +          |
| Uusi-Rasi et al, 2015     | +                                           | ?                                       | ?                                                         | ?                                               | +                                        | +                                    | +          |
| Witham et al, 2013        | +                                           | +                                       | +                                                         | +                                               | ?                                        | +                                    | +          |
| Xue et al, 2017           | +                                           | ?                                       | ?                                                         | ?                                               | +                                        | ?                                    | ?          |

264x824mm (600 x 600 DPI)

1  
2  
3  
4  
5  
6  
7  
8  
9  
10  
11  
12  
13  
14  
15  
16  
17  
18  
19  
20  
21  
22  
23  
24  
25  
26  
27  
28  
29  
30  
31  
32  
33  
34  
35  
36  
37  
38  
39  
40  
41  
42  
43  
44  
45  
46  
47  
48  
49  
50  
51  
52  
53  
54  
55  
56  
57  
58  
59  
60

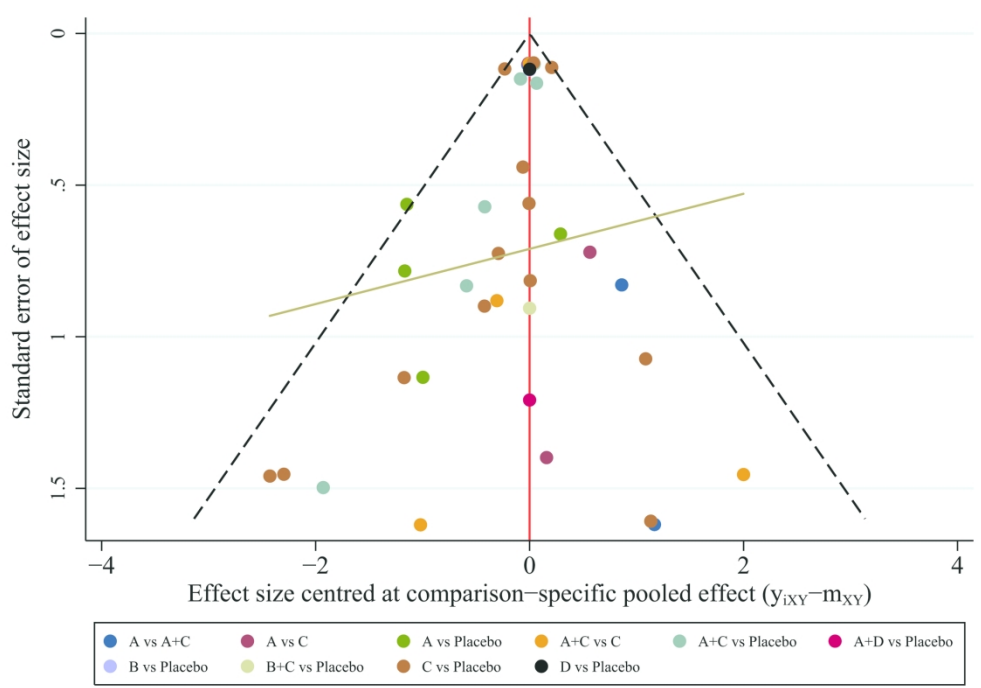

101x73mm (600 x 600 DPI)

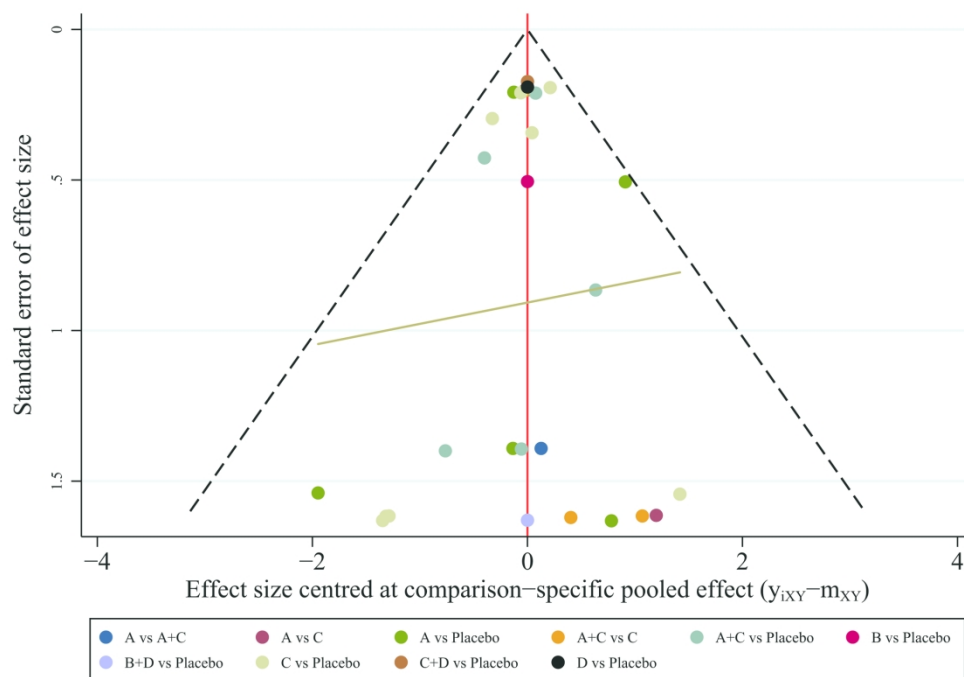

101x73mm (600 x 600 DPI)

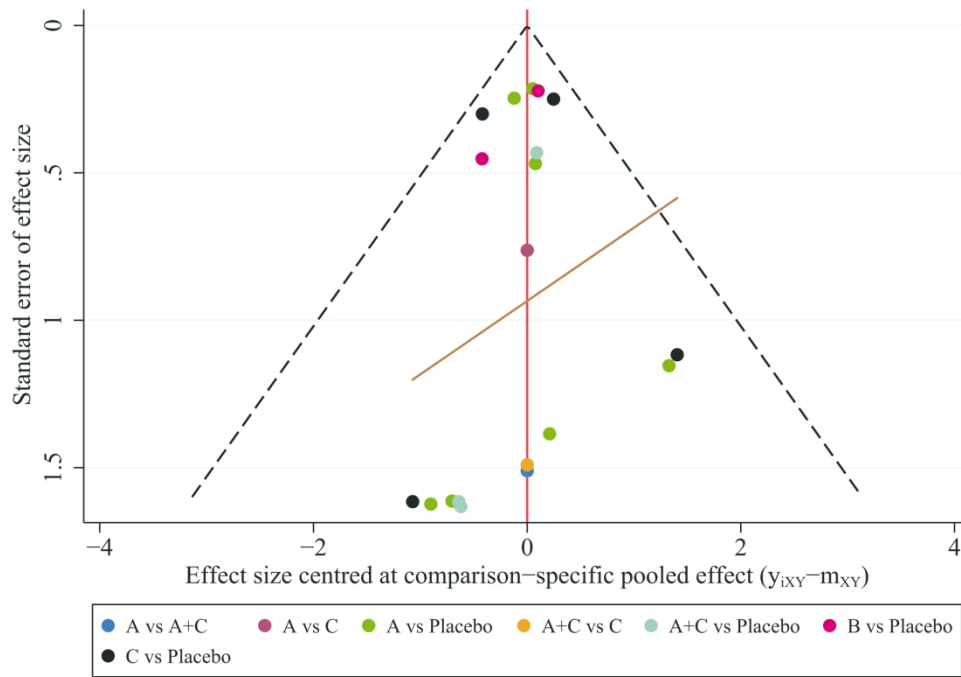

101x73mm (600 x 600 DPI)

1  
2  
3  
4  
5  
6  
7  
8  
9  
10  
11  
12  
13  
14  
15  
16  
17  
18  
19  
20  
21  
22  
23  
24  
25  
26  
27  
28  
29  
30  
31  
32  
33  
34  
35  
36  
37  
38  
39  
40  
41  
42  
43  
44  
45  
46  
47  
48  
49  
50  
51  
52  
53  
54  
55  
56  
57  
58  
59  
60

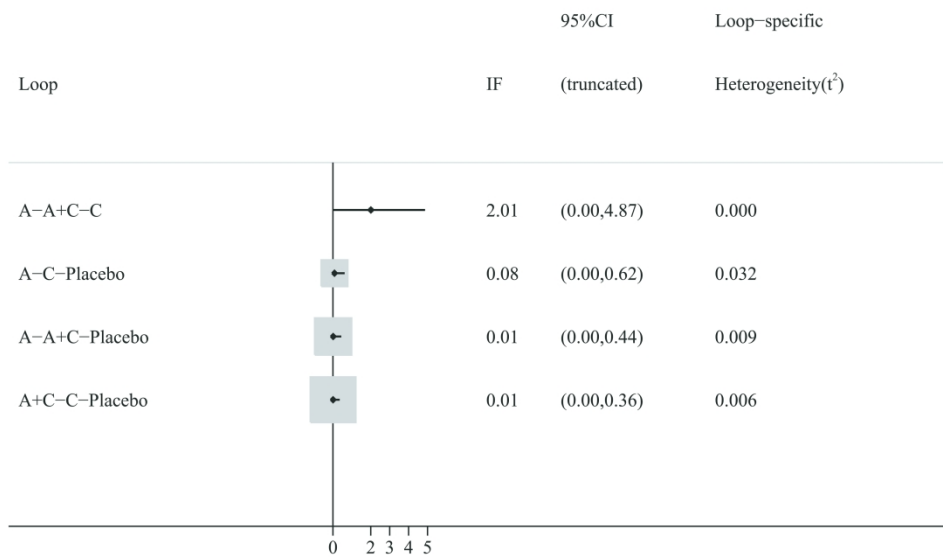

183x123mm (600 x 600 DPI)



1  
2  
3  
4  
5  
6  
7  
8  
9  
10  
11  
12  
13  
14  
15  
16  
17  
18  
19  
20  
21  
22  
23  
24  
25  
26  
27  
28  
29  
30  
31  
32  
33  
34  
35  
36  
37  
38  
39  
40  
41  
42  
43  
44  
45  
46  
47  
48  
49  
50  
51  
52  
53  
54  
55  
56  
57  
58  
59  
60

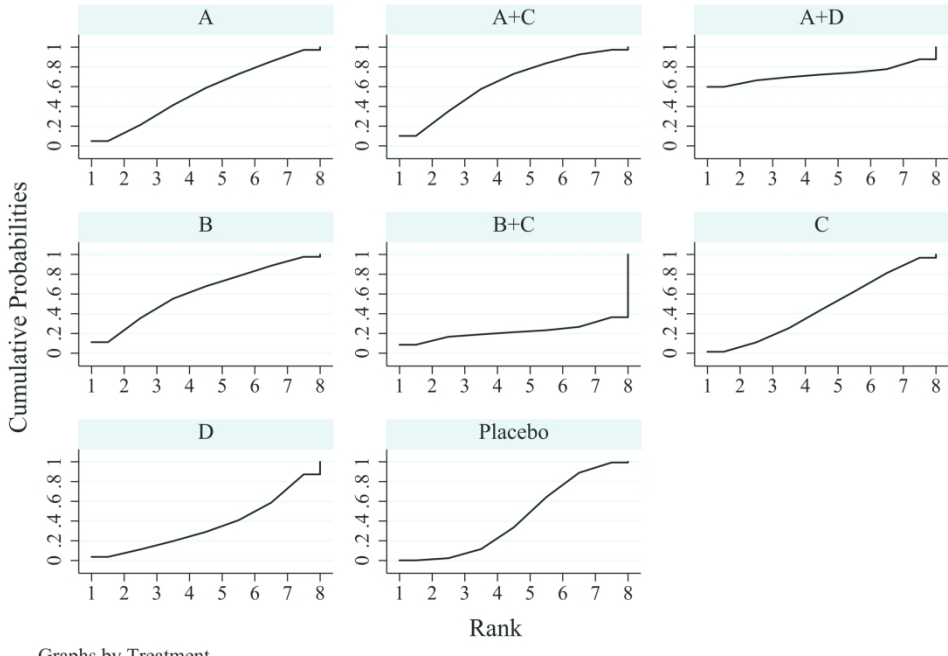

101x73mm (600 x 600 DPI)

1  
2  
3  
4  
5  
6  
7  
8  
9  
10  
11  
12  
13  
14  
15  
16  
17  
18  
19  
20  
21  
22  
23  
24  
25  
26  
27  
28  
29  
30  
31  
32  
33  
34  
35  
36  
37  
38  
39  
40  
41  
42  
43  
44  
45  
46  
47  
48  
49  
50  
51  
52  
53  
54  
55  
56  
57  
58  
59  
60

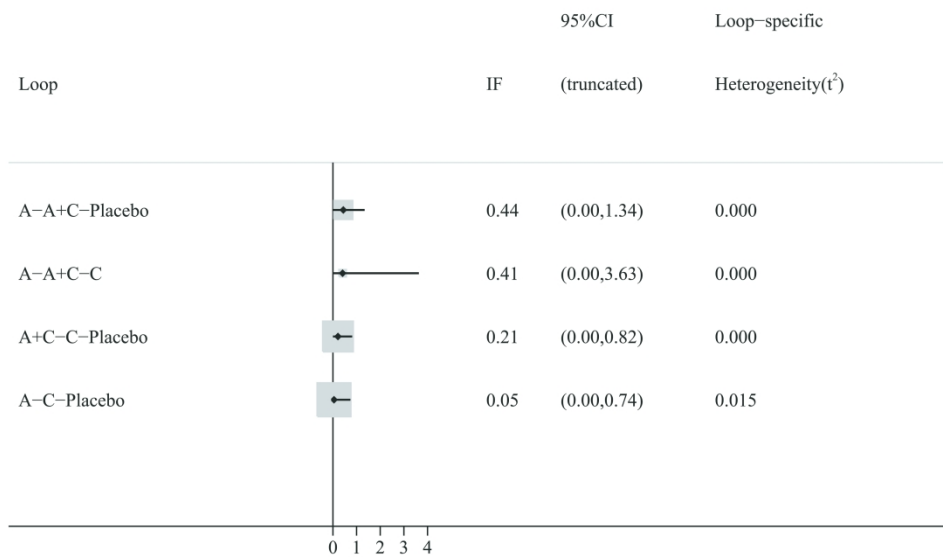

183x123mm (600 x 600 DPI)

1  
2  
3  
4  
5  
6  
7  
8  
9  
10  
11  
12  
13  
14  
15  
16  
17  
18  
19  
20  
21  
22  
23  
24  
25  
26  
27  
28  
29  
30  
31  
32  
33  
34  
35  
36  
37  
38  
39  
40  
41  
42  
43  
44  
45  
46  
47  
48  
49  
50  
51  
52  
53  
54  
55  
56  
57  
58  
59  
60

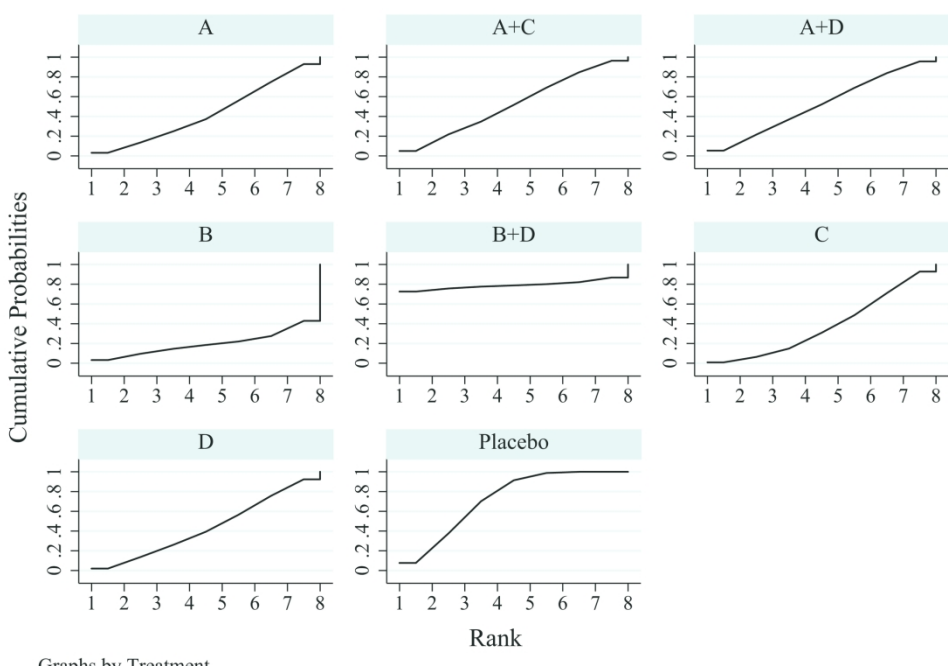

Graphs by Treatment

101x73mm (600 x 600 DPI)

1  
2  
3  
4  
5  
6  
7  
8  
9  
10  
11  
12  
13  
14  
15  
16  
17  
18  
19  
20  
21  
22  
23  
24  
25  
26  
27  
28  
29  
30  
31  
32  
33  
34  
35  
36  
37  
38  
39  
40  
41  
42  
43  
44  
45  
46  
47  
48  
49  
50  
51  
52  
53  
54  
55  
56  
57  
58  
59  
60

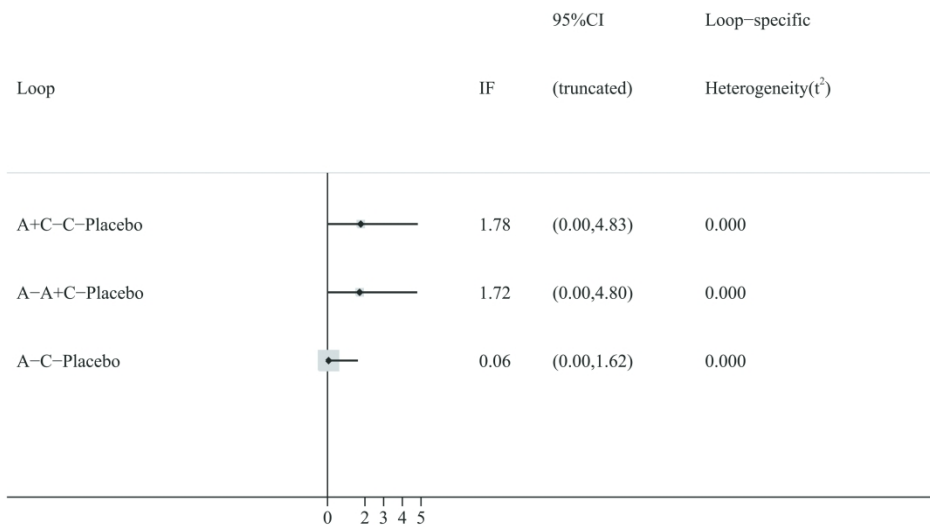

\*\*\* Loop(s) [A-A+C-C] are formed only by multi-arm trial(s) – Consistent by definition

177x116mm (600 x 600 DPI)

1  
2  
3  
4  
5  
6  
7  
8  
9  
10  
11  
12  
13  
14  
15  
16  
17  
18  
19  
20  
21  
22  
23  
24  
25  
26  
27  
28  
29  
30  
31  
32  
33  
34  
35  
36  
37  
38  
39  
40  
41  
42  
43  
44  
45  
46  
47  
48  
49  
50  
51  
52  
53  
54  
55  
56  
57  
58  
59  
60

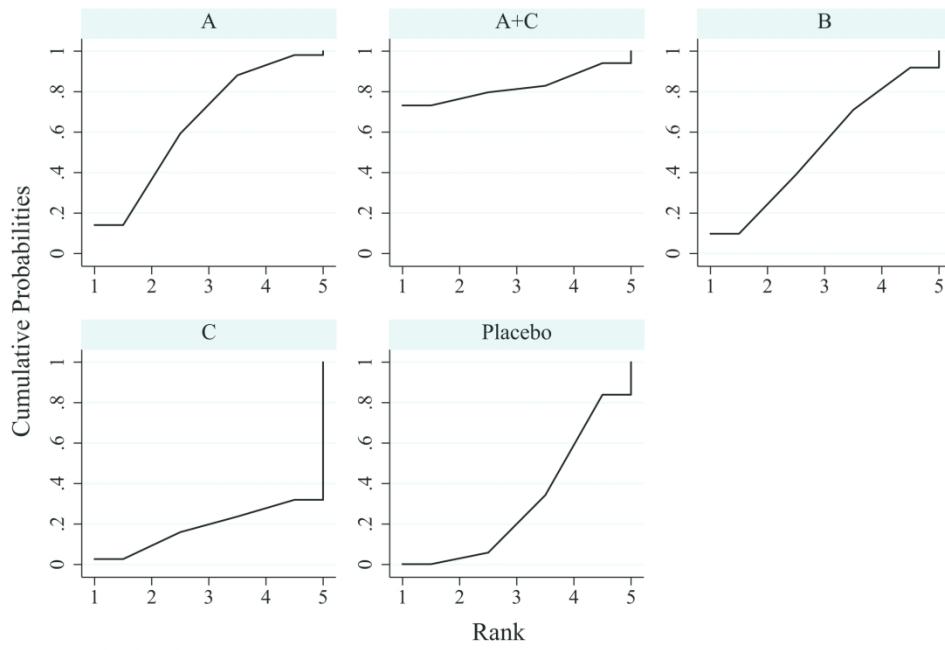

Graphs by Treatment

101x73mm (600 x 600 DPI)

Supplementary Table S1 - Checklist of items to include when reporting a systematic review or meta-analysis

1  
2  
3  
4  
5  
6  
7  
8  
9  
10  
11  
12  
13  
14  
15  
16  
17  
18  
19  
20  
21  
22  
23  
24  
25  
26  
27  
28  
29  
30  
31  
32  
33  
34  
35  
36  
37  
38  
39  
40  
41  
42  
43  
44  
45  
46  
47

| Section/topic             | # | Checklist item                                                                                                                                                                                                                                                                                              | Reported on page # |
|---------------------------|---|-------------------------------------------------------------------------------------------------------------------------------------------------------------------------------------------------------------------------------------------------------------------------------------------------------------|--------------------|
| <b>TITLE</b>              |   |                                                                                                                                                                                                                                                                                                             |                    |
| Title                     | 1 | Identify the report as a systematic review, meta-analysis, or both.                                                                                                                                                                                                                                         | 1                  |
| <b>ABSTRACT</b>           |   |                                                                                                                                                                                                                                                                                                             |                    |
| Structured summary        | 2 | Provide a structured summary including, as applicable: background; objectives; data sources; study eligibility criteria, participants, and interventions; study appraisal and synthesis methods; results; limitations; conclusions and implications of key findings; systematic review registration number. | 2                  |
| <b>INTRODUCTION</b>       |   |                                                                                                                                                                                                                                                                                                             |                    |
| Rationale                 | 3 | Describe the rationale for the review in the context of what is already known.                                                                                                                                                                                                                              | 3                  |
| Objectives                | 4 | Provide an explicit statement of questions being addressed with reference to participants, interventions, comparisons, outcomes, and study design (PICOS).                                                                                                                                                  | 4                  |
| <b>METHODS</b>            |   |                                                                                                                                                                                                                                                                                                             |                    |
| Protocol and registration | 5 | Indicate if a review protocol exists, if and where it can be accessed (e.g., Web address), and, if available, provide registration information including registration number.                                                                                                                               | 4                  |
| Eligibility criteria      | 6 | Specify study characteristics (e.g., PICOS, length of follow-up) and report characteristics (e.g., years considered, language, publication status) used as criteria for eligibility, giving rationale.                                                                                                      | 4                  |
| Information sources       | 7 | Describe all information sources (e.g., databases with dates of coverage, contact with study authors to identify additional studies) in the search and date last searched.                                                                                                                                  | 5                  |
| Search                    | 8 | Present full electronic search strategy for at least one database, including any limits used, such that it could be repeated.                                                                                                                                                                               | NA                 |

1  
2  
3  
4  
5  
6  
7  
8  
9  
10  
11  
12  
13  
14  
15  
16  
17  
18  
19  
20  
21  
22  
23  
24  
25  
26  
27  
28  
29  
30  
31  
32  
33  
34  
35  
36  
37  
38  
39  
40  
41  
42  
43  
44  
45  
46  
47

| Section/topic                      | #  | Checklist item                                                                                                                                                                                                         | Reported on page # |
|------------------------------------|----|------------------------------------------------------------------------------------------------------------------------------------------------------------------------------------------------------------------------|--------------------|
| Study selection                    | 9  | State the process for selecting studies (i.e., screening, eligibility, included in systematic review, and, if applicable, included in the meta-analysis).                                                              | 5                  |
| Data collection process            | 10 | Describe method of data extraction from reports (e.g., piloted forms, independently, in duplicate) and any processes for obtaining and confirming data from investigators.                                             | 6                  |
| Data items                         | 11 | List and define all variables for which data were sought (e.g., PICOS, funding sources) and any assumptions and simplifications made.                                                                                  | 6                  |
| Risk of bias in individual studies | 12 | Describe methods used for assessing risk of bias of individual studies (including specification of whether this was done at the study or outcome level), and how this information is to be used in any data synthesis. | 6                  |
| Summary measures                   | 13 | State the principal summary measures (e.g., risk ratio, difference in means).                                                                                                                                          | 6                  |
| Synthesis of results               | 14 | Describe the methods of handling data and combining results of studies, if done, including measures of consistency (e.g., I <sup>2</sup> ) for each meta-analysis.                                                     | 7                  |
| Risk of bias across studies        | 15 | Specify any assessment of risk of bias that may affect the cumulative evidence (e.g., publication bias, selective reporting within studies).                                                                           | 7                  |
| Additional analyses                | 16 | Describe methods of additional analyses (e.g., sensitivity or subgroup analyses, meta-regression), if done, indicating which were pre-specified.                                                                       | 7                  |
| <b>RESULTS</b>                     |    |                                                                                                                                                                                                                        |                    |
| Study selection                    | 17 | Give numbers of studies screened, assessed for eligibility, and included in the review, with reasons for exclusions at each stage, ideally with a flow diagram.                                                        | 7                  |
| Study characteristics              | 18 | For each study, present characteristics for which data were extracted (e.g., study size, PICOS, follow-up period) and provide the citations.                                                                           | 7                  |
| Risk of bias within studies        | 19 | Present data on risk of bias of each study and, if available, any outcome-level assessment (see Item 12).                                                                                                              | 8                  |
| Results of individual studies      | 20 | For all outcomes considered (benefits or harms), present, for each study: (a) simple summary data for each intervention group and (b) effect estimates and confidence intervals, ideally with a forest plot.           | 8-10               |

1  
2  
3  
4  
5  
6  
7  
8  
9  
10  
11  
12  
13  
14  
15  
16  
17  
18  
19  
20  
21  
22  
23  
24  
25  
26  
27  
28  
29  
30  
31  
32  
33  
34  
35  
36  
37  
38  
39  
40  
41  
42  
43  
44  
45  
46  
47

| Section/topic               | #  | Checklist item                                                                                                                                                                        | Reported on page # |
|-----------------------------|----|---------------------------------------------------------------------------------------------------------------------------------------------------------------------------------------|--------------------|
| Synthesis of results        | 21 | Present results of each meta-analysis done, including confidence intervals and measures of consistency.                                                                               | 8-10               |
| Risk of bias across studies | 22 | Present results of any assessment of risk of bias across studies (see Item 15).                                                                                                       | 8                  |
| Additional analysis         | 23 | Give results of additional analyses, if done (e.g., sensitivity or subgroup analyses, meta-regression [see Item 16]).                                                                 | 8-10               |
| <b>DISCUSSION</b>           |    |                                                                                                                                                                                       |                    |
| Summary of evidence         | 24 | Summarize the main findings including the strength of evidence for each main outcome; consider their relevance to key groups (e.g., health care providers, users, and policy makers). | 10-12              |
| Limitations                 | 25 | Discuss limitations at study and outcome level (e.g., risk of bias), and at review level (e.g., incomplete retrieval of identified research, reporting bias).                         | 11                 |
| Conclusions                 | 26 | Provide a general interpretation of the results in the context of other evidence, and implications for future research.                                                               | 12                 |
| <b>FUNDING</b>              |    |                                                                                                                                                                                       |                    |
| Funding                     | 27 | Describe sources of funding for the systematic review and other support (e.g., supply of data); role of funders for the systematic review.                                            | 12                 |



| Source                                          | Intervention                                                 | Women,<br>No. (%) | Mean Age, y     | Previous<br>Fracture | Calcium Intake,<br>mg/d | Baseline 25OHD,<br>ng/mL | Treatment<br>Duration |
|-------------------------------------------------|--------------------------------------------------------------|-------------------|-----------------|----------------------|-------------------------|--------------------------|-----------------------|
| Avenell et al, 2004<br>(United Kingdom)[1]      | Calcium(1 g/d) (n = 29)                                      | NA a (83)         | 78 <sup>b</sup> | Yes                  | NA                      | NA                       | 3.8 y                 |
|                                                 | No treatment (n = 35)                                        |                   |                 |                      |                         |                          |                       |
|                                                 | D <sub>3</sub> ( 800IU/d) (n = 35)                           | NA a (83)         | 78 <sup>b</sup> | Yes                  | NA                      | NA                       | 3.8 y                 |
|                                                 | No treatment (n = 35)                                        |                   |                 |                      |                         |                          |                       |
|                                                 | Calcium (1g/d) + D <sub>3</sub><br>(800IU/d) (n = 35)        | NA a (83)         | 78 <sup>b</sup> | Yes                  | NA                      | NA                       | 3.8 y                 |
|                                                 | No treatment (n = 35)                                        |                   |                 |                      |                         |                          |                       |
| Baron et al, 1999<br>(United States)[2]         | Calcium: 1.2 g/d (n = 464)                                   | 258 (28)          | 61.0            | NA                   | 877                     | NA                       | 4 y                   |
|                                                 | Placebo (n = 466)                                            |                   |                 |                      |                         |                          |                       |
| Dawson-Hughes et al,<br>1997 (United States)[3] | Calcium (0.5g/d) + D <sub>3</sub><br>(700IU/d) (n = 187)     | 213 (54)          | 71.1            | NA                   | 729                     | 29.6 <sup>e</sup>        | 3 y                   |
|                                                 | Placebo (n = 202)                                            |                   |                 |                      |                         |                          |                       |
| Glendenning et al, 2012<br>(Australia)[4]       | D <sub>3</sub> (150000 IU every 3 mo)<br>(n = 353)           | 686 (100)         | 76.7            | NA                   | 864                     | 26.3 <sup>e</sup>        | 9 mo                  |
|                                                 | Placebo (n = 333)                                            |                   |                 |                      |                         |                          |                       |
| Grant et al, 2005<br>(United Kingdom)[5]        | Calcium(1 g/d) (n = 1311)                                    | 2241 (85)         | 77              | Yes                  | NA                      | 15.2 <sup>e,f</sup>      | 2-5 y                 |
|                                                 | Placebo (n = 1332)                                           |                   |                 |                      |                         |                          |                       |
|                                                 | D <sub>3</sub> ( 800IU/d) (n = 1343)                         | 2264 (85)         | 77              | Yes                  | NA                      | 15.2 <sup>e,f</sup>      | 2-5 y                 |
|                                                 | Placebo (n = 1332)                                           |                   |                 |                      |                         |                          |                       |
|                                                 | Calcium (1g/d) + D <sub>3</sub><br>(800IU/d) (n = 1306)      | 2232 (85)         | 77.5            | Yes                  | NA                      | 15.2 <sup>e,f</sup>      | 2-5 y                 |
|                                                 | Placebo (n = 1332)                                           |                   |                 |                      |                         |                          |                       |
| Hansson and Roos,<br>1987 (Sweden)[6]           | Calcium (1g/d) (n = 25)                                      | 50 (100)          | 65.9            | Yes                  | NA                      | NA                       | 3 y                   |
|                                                 | Placebo (n = 25)                                             |                   |                 |                      |                         |                          |                       |
| Harwood et al, 2004<br>(United Kingdom)[7]      | D <sub>3</sub> (300000 IU once) (n = 38)                     | 75 (100)          | 80.5            | Yes                  | NA                      | 11.6                     | 1 y                   |
|                                                 | No treatment (n = 37)                                        |                   |                 |                      |                         |                          |                       |
|                                                 | Calcium (1g/d) + D <sub>2</sub><br>(300000 IU once) (n = 36) | 112 (100)         | 81.7            | Yes                  | NA                      | 11.9                     | 1 y                   |
|                                                 | Calcium (1g/d) + D <sub>3</sub><br>(800IU/d) (n = 39)        |                   |                 |                      |                         |                          |                       |
|                                                 | No treatment (n = 37)                                        |                   |                 |                      |                         |                          |                       |

|    |                       |                                         |            |      |                      |      |                   |           |
|----|-----------------------|-----------------------------------------|------------|------|----------------------|------|-------------------|-----------|
| 1  |                       |                                         |            |      |                      |      |                   |           |
| 2  |                       |                                         |            |      |                      |      |                   |           |
| 3  | Hin et al, 2017       | D <sub>3</sub> (4000 IU/d)(n = 102)     | 150 (49)   | 71.7 | Partial <sup>c</sup> | 710  | 20.1              | 1 y       |
| 4  | (United Kingdom)[8]   | D <sub>3</sub> (2000 IU/d)(n = 102)     |            |      |                      |      |                   |           |
| 5  |                       | Placebo (n = 101)                       |            |      |                      |      |                   |           |
| 6  |                       |                                         |            |      |                      |      |                   |           |
| 7  | Inkovaara et al, 1983 | Calcium (1.2 g/d) (n = 42)              | 69 (82)    | 80.1 | NA                   | NA   | NA                | 9 mo      |
| 8  | (Finland)[9]          | Placebo (n = 42)                        |            |      |                      |      |                   |           |
| 9  |                       |                                         |            |      |                      |      |                   |           |
| 10 |                       | D <sub>3</sub> (1000 IU/d) (n = 45)     | 71 (82)    | 79.6 | NA                   | NA   | NA                | 9 mo      |
| 11 |                       | Placebo (n = 42)                        |            |      |                      |      |                   |           |
| 12 |                       |                                         |            |      |                      |      |                   |           |
| 13 |                       | Calcium (1.2g/d) + D <sub>3</sub> (1000 | 69 (78)    | 79.0 | NA                   | NA   | NA                | 9 mo      |
| 14 |                       | IU/d) (n = 46)                          |            |      |                      |      |                   |           |
| 15 |                       | Placebo (n = 42)                        |            |      |                      |      |                   |           |
| 16 |                       |                                         |            |      |                      |      |                   |           |
| 17 |                       |                                         |            |      |                      |      |                   |           |
| 18 | Jackson et al, 2006   | Calcium (1g/d) + D <sub>3</sub> (400    | 7972 (100) | 62.4 | Partial <sup>c</sup> | 1151 | 18.9 <sup>e</sup> | 7 y       |
| 19 | (United States)[10]   | IU/d) (n = 4015)                        |            |      |                      |      |                   |           |
| 20 |                       | Placebo (n = 3957)                      |            |      |                      |      |                   |           |
| 21 |                       |                                         |            |      |                      |      |                   |           |
| 22 | Lips et al, 1996      | 400 IU/d (n = 1291)                     | 1916 (74)  | 80.0 | No hip fracture      | 868  | 10.6 <sup>e</sup> | 3-4 y     |
| 23 | (The Netherlands)[11] | Placebo (n = 1287)                      |            |      |                      |      |                   |           |
| 24 |                       |                                         |            |      |                      |      |                   |           |
| 25 | Liu et al, 2015       | Calcium (1.5g/d) + D <sub>3</sub> (600  | 98 (100)   | 62.1 | No                   | 1500 | NA                | 1 y       |
| 26 | (China)[12]           | IU/d) (n = 50)                          |            |      |                      |      |                   |           |
| 27 |                       | Placebo (n = 48)                        |            |      |                      |      |                   |           |
| 28 |                       |                                         |            |      |                      |      |                   |           |
| 29 |                       |                                         |            |      |                      |      |                   |           |
| 30 | Massart et al, 2014   | D <sub>3</sub> (25000 IU every week )   | 21 (38)    | 64.1 | NA                   | 881  | 17.8              | 3 mo      |
| 31 | (Belgium)[13]         | (n = 26)                                |            |      |                      |      |                   |           |
| 32 |                       | Placebo (n = 29)                        |            |      |                      |      |                   |           |
| 33 |                       |                                         |            |      |                      |      |                   |           |
| 34 | Mitri et al, 2011     | D <sub>3</sub> (2000 IU/d)(n = 23)      | 25 (53)    | 58.0 | NA                   | 926  | 25.3              | 4 mo      |
| 35 | (United States)[14]   | Placebo (n = 24)                        |            |      |                      |      |                   |           |
| 36 |                       |                                         |            |      |                      |      |                   |           |
| 37 | Peacock et al, 2000   | Calcium (0.75g/d) (n = 126)             | 187 (72)   | 73.8 | Partial <sup>c</sup> | 597  | 25.0              | 4 y       |
| 38 | (United States)[15]   | Placebo (n = 135)                       |            |      |                      |      |                   |           |
| 39 |                       |                                         |            |      |                      |      |                   |           |
| 40 | Porthouse et al, 2005 | Calcium (1g/d) + D <sub>3</sub> (800    | 3314 (100) | 76.8 | Partial <sup>c</sup> | 1080 | NA                | 1.5-3.5 y |
| 41 | (United Kingdom)[16]  | IU/d) (n = 1321)                        |            |      |                      |      |                   |           |
| 42 |                       | No treatment (n = 1993)                 |            |      |                      |      |                   |           |
| 43 |                       |                                         |            |      |                      |      |                   |           |
| 44 | Prince et al, 2006    | Calcium (0.48g/d) (n = 730)             | 1460 (100) | 75.2 | Partial <sup>c</sup> | 915  | 31.0 <sup>e</sup> | 5 y       |
| 45 | (Australia)[17]       | Placebo (n = 730)                       |            |      |                      |      |                   |           |
| 46 |                       |                                         |            |      |                      |      |                   |           |
| 47 | Punthakee et al, 2012 | D <sub>3</sub> (1000 IU/d) (n = 607)    | 499 (41)   | 66.6 | Partial <sup>c</sup> | NA   | NA                | 4 mo      |
| 48 | (Canada)[18]          | Placebo (n = 614)                       |            |      |                      |      |                   |           |
| 49 |                       |                                         |            |      |                      |      |                   |           |
| 50 |                       |                                         |            |      |                      |      |                   |           |
| 51 | Recker et al, 1996    | Calcium (1.2 g/d) (n = 95)              | 197 (100)  | 73.5 | Partial <sup>c</sup> | 434  | 25.5 <sup>e</sup> | 4 y       |
| 52 | (United States)[19]   | Placebo (n = 102)                       |            |      |                      |      |                   |           |
| 53 |                       |                                         |            |      |                      |      |                   |           |
| 54 | Reid et al, 1993      | Calcium (1 g/d) (n = 68)                | 135 (100)  | 58   | No vertebral         | 750  | 37.5              | 4 y       |
| 55 | (New Zealand)[20]     | Placebo (n = 67)                        |            |      | fracture             |      |                   |           |
| 56 |                       |                                         |            |      |                      |      |                   |           |
| 57 |                       |                                         |            |      |                      |      |                   |           |
| 58 |                       |                                         |            |      |                      |      |                   |           |
| 59 |                       |                                         |            |      |                      |      |                   |           |
| 60 |                       |                                         |            |      |                      |      |                   |           |

|                                             |                                                                                    |            |      |                      |                  |                   |       |
|---------------------------------------------|------------------------------------------------------------------------------------|------------|------|----------------------|------------------|-------------------|-------|
| Reid et al, 2006<br>(New Zealand)[21]       | Calcium (1 g/d) (n = 732)<br>Placebo (n = 739)                                     | 1471 (100) | 74.3 | Partial <sup>c</sup> | 857              | 20.7              | 5 y   |
| Riggs et al, 1998<br>(United States)[22]    | Calcium (1.6 g/d) (n = 119)<br>Placebo (n = 117)                                   | 236 (100)  | 66.2 | No                   | 714              | 30.1              | 4 y   |
| Salovaara et al, 2010<br>(Finland)[23]      | Calcium(1g/d) + D <sub>3</sub><br>(800 IU/d) (n = 1718)<br>No treatment (n = 1714) | 3432 (100) | 67.3 | Partial <sup>c</sup> | 957              | 19.8 <sup>e</sup> | 3 y   |
| Sanders et al, 2010<br>(Australia)[24]      | D <sub>3</sub> (500000 IU every year)<br>(n = 1131)<br>Placebo (n = 1127)          | 2258 (100) | 76.1 | Partial <sup>c</sup> | 976              | 19.8 <sup>e</sup> | 3-5 y |
| Smith et al, 2007<br>(United Kingdom)[25]   | D <sub>3</sub> (300000 IU every year)<br>(n = 4727)<br>Placebo (n = 4713)          | 5086 (54)  | 79.1 | Partial <sup>c</sup> | 625 <sup>d</sup> | 22.6 <sup>e</sup> | 3 y   |
| Trivedi et al, 2003<br>(United Kingdom)[26] | D <sub>3</sub> (100000 IU every 4 mo)<br>(n = 1345)<br>Placebo (n = 1341)          | 649 (24)   | 74.8 | NA                   | 742              | NA                | 5 y   |
| Uusi-Rasi et al, 2015<br>(Finland)[27]      | D <sub>3</sub> (800 IU/d) (n = 102)<br>Placebo (n = 102)                           | 204 (100)  | 73.9 | NA                   | 1082             | 26.7              | 2 y   |
| Witham et al, 2013<br>(United Kingdom)[28]  | D <sub>3</sub> (100000 IU every 3 mo)<br>(n = 80)<br>Placebo (n = 79)              | 77 (49)    | 76.8 | NA                   | 1125             | 18.0              | 1 y   |
| Xue et al, 2017<br>(China)[29]              | Calcium (0.6g/d) + D <sub>3</sub> (800<br>IU/d) (n = 139)<br>Placebo (n = 173)     | 312 (100)  | 63.6 | Partial <sup>c</sup> | NA               | 30.8              | 1 y   |

Abbreviation: 25OHD, 25-hydroxyvitamin D; NA, not available

<sup>a</sup> Women accounted for 83% of total participants in this trial, but detailed data not available for each group.

<sup>b</sup> Mean age is 78 y for total participants in this trial, but detailed data not available for each group.

<sup>c</sup> This trial reported partial participants with fracture history.

<sup>d</sup> Partial participants were assessed for dietary calcium intake.

<sup>e</sup> Partial participants received measurement of baseline 25OHD concentrations.

<sup>f</sup> The RECORD trial reported that the mean baseline 25OHD concentrations for a sample of 60 participants was 15.2 ng/mL, but detailed data were not available for each group.

**supplementary Table 1.** The characteristics of the included studies.

## References

1. Avenell A, Grant AM, McGee M, McPherson G, Campbell MK, McGee MA. The effects of an open design on trial participant recruitment, compliance and retention--a randomized controlled trial comparison with a blinded, placebo-controlled design. *Clinical trials (London, England)*. 2004;1(6):490-8.
2. Baron JA, Beach M, Mandel JS, van Stolk RU, Haile RW, Sandler RS, et al. Calcium supplements for the prevention of colorectal adenomas. Calcium Polyp Prevention Study Group. *The New England journal of medicine*. 1999 Jan 14;340(2):101-7.
3. Dawson-Hughes B, Harris SS, Krall EA, Dallal GE. Effect of calcium and vitamin D supplementation on bone density in men and women 65 years of age or older. *The New England journal of medicine*. 1997 Sep 4;337(10):670-6.
4. Glendenning P, Zhu K, Inderjeeth C, Howat P, Lewis JR, Prince RL. Effects of three-monthly oral 150,000 IU cholecalciferol supplementation on falls, mobility, and muscle strength in older postmenopausal women: a randomized controlled trial. *Journal of bone and mineral research : the official journal of the American Society for Bone and Mineral Research*. 2012 Jan;27(1):170-6.
5. Grant AM, Avenell A, Campbell MK, McDonald AM, MacLennan GS, McPherson GC, et al. Oral vitamin D3 and calcium for secondary prevention of low-trauma fractures in elderly people (Randomised Evaluation of Calcium Or vitamin D, RECORD): a randomised placebo-controlled trial. *Lancet (London, England)*. 2005 May 7-13;365(9471):1621-8.
6. Hansson T, Roos B. The effect of fluoride and calcium on spinal bone mineral content: a controlled, prospective (3 years) study. *Calcified tissue international*. 1987 Jun;40(6):315-7.
7. Harwood RH, Sahota O, Gaynor K, Masud T, Hosking DJ. A randomised, controlled comparison of different calcium and vitamin D supplementation regimens in elderly women after hip fracture: The Nottingham Neck of Femur (NoNOF) study. *Age and ageing*. 2004;33(1):45-51.
8. Hin H, Tomson J, Newman C, Kurien R, Lay M, Cox J, et al. Optimum dose of vitamin D for disease prevention in older people: BEST-D trial of vitamin D in primary care. *Osteoporosis International*. 2017;28(3):841-51.
9. Inkovaara J, Gothoni G, Halttula R. Calcium, vitamin D and anabolic steroid in treatment of aged bones: Double-blind placebo-controlled long-term clinical trial. *Age and ageing*. 1983;12(2):124-30.
10. Jackson RD, LaCroix AZ, Gass M, Wallace RB, Robbins J, Lewis CE, et al. Calcium plus vitamin D supplementation and the risk of fractures. *New England Journal of Medicine*. 2006;354(7):669-83.
11. Lips P, Graafmans WC, Ooms ME, Bezemer PD, Bouter LM. Vitamin D supplementation and fracture incidence in elderly persons: A randomized, placebo-controlled clinical trial. *Annals of internal medicine*. 1996;124(4):400-6.
12. Liu BX, Chen SP, Li YD, Wang J, Zhang B, Lin Y, et al. The Effect of the Modified Eighth Section of Eight-Section Brocade on Osteoporosis in Postmenopausal Women: A Prospective Randomized Trial. *Medicine*. 2015 Jun;94(25):e991.
13. Massart A, DeBelle FD, Racape J, Gervy C, Husson C, Dhaene M, et al. Biochemical parameters after cholecalciferol repletion in hemodialysis: results From the VitaDial randomized trial. *American journal of kidney diseases : the official journal of the National Kidney Foundation*. 2014 Nov;64(5):696-705.
14. Mitri J, Dawson-Hughes B, Hu FB, Pittas AG. Effects of vitamin D and calcium supplementation on pancreatic beta cell function, insulin sensitivity, and glycemia in adults at high risk of diabetes: the

- 1  
2  
3 Calcium and Vitamin D for Diabetes Mellitus (CaDDM) randomized controlled trial. *The American*  
4 *journal of clinical nutrition*. 2011 Aug;94(2):486-94.
- 5 15. Peacock M, Liu G, Carey M, McClintock R, Ambrosius W, Hui S, et al. Effect of calcium or 25OH  
6 vitamin D3 dietary supplementation on bone loss at the hip in men and women over the age of 60.  
7 *The Journal of clinical endocrinology and metabolism*. 2000 Sep;85(9):3011-9.
- 8 16. Porthouse J, Cockayne S, King C, Saxon L, Steele E, Aspray T, et al. Randomised controlled trial of  
9 calcium and supplementation with cholecalciferol (vitamin D3) for prevention of fractures in primary  
10 care. *BMJ (Clinical research ed)*. 2005 Apr 30;330(7498):1003.
- 11 17. Prince RL, Devine A, Dhaliwal SS, Dick IM. Effects of calcium supplementation on clinical fracture  
12 and bone structure: Results of a 5-year, double-blind, placebo-controlled trial in elderly women.  
13 *Archives of internal medicine*. 2006;166(8):869-75.
- 14 18. Punthakee Z, Bosch J, Dagenais G, Diaz R, Holman R, Probstfield JL, et al. Design, history and  
15 results of the Thiazolidinedione Intervention with vitamin D Evaluation (TIDE) randomised controlled  
16 trial. *Diabetologia*. 2012;55(1):36-45.
- 17 19. Recker RR, Hinders S, Davies KM, Heaney RP, Stegman MR, Lappe JM, et al. Correcting calcium  
18 nutritional deficiency prevents spine fractures in elderly women. *Journal of bone and mineral*  
19 *research : the official journal of the American Society for Bone and Mineral Research*. 1996  
20 Dec;11(12):1961-6.
- 21 20. Reid IR, Ames RW, Evans MC, Gamble GD, Sharpe SJ. Effect of calcium supplementation on bone  
22 loss in postmenopausal women. *The New England journal of medicine*. 1993 Feb 18;328(7):460-4.
- 23 21. Reid IR, Mason B, Horne A, Ames R, Reid HE, Bava U, et al. Randomized Controlled Trial of  
24 Calcium in Healthy Older Women. *American Journal of Medicine*. 2006;119(9):777-85.
- 25 22. Riggs BL, O'Fallon WM, Muhs J, O'Connor MK, Kumar R, Melton LJ, 3rd. Long-term effects of  
26 calcium supplementation on serum parathyroid hormone level, bone turnover, and bone loss in  
27 elderly women. *Journal of bone and mineral research : the official journal of the American Society for*  
28 *Bone and Mineral Research*. 1998 Feb;13(2):168-74.
- 29 23. Salovaara K, Tuppurainen M, Kärkkäinen M, Rikkonen T, Sandini L, Sirola J, et al. Effect of vitamin  
30 D3 and calcium on fracture risk in 65- to 71-year-old women: A population-based 3-year randomized,  
31 controlled trial - The OSTPRE-FPS. *Journal of Bone and Mineral Research*. 2010;25(7):1487-95.
- 32 24. Sanders KM, Stuart AL, Williamson EJ, Simpson JA, Kotowicz MA, Young D, et al. Annual high-dose  
33 oral vitamin D and falls and fractures in older women: A randomized controlled trial. *JAMA - Journal of*  
34 *the American Medical Association*. 2010;303(18):1815-22.
- 35 25. Smith H, Anderson F, Raphael H, Maslin P, Crozier S, Cooper C. Effect of annual intramuscular  
36 vitamin D on fracture risk in elderly men and women - A population-based, randomized, double-blind,  
37 placebo-controlled trial. *Rheumatology*. 2007;46(12):1852-7.
- 38 26. Trivedi DP, Doll R, Khaw KT. Effect of four monthly oral vitamin D3 (cholecalciferol)  
39 supplementation on fractures and mortality in men and women living in the community: randomised  
40 double blind controlled trial. *BMJ (Clinical research ed)*. 2003 Mar 1;326(7387):469.
- 41 27. Uusi-Rasi K, Patil R, Karinkanta S, Kannus P, Tokola K, Lamberg-Allardt C, et al. Exercise and  
42 vitamin D in fall prevention among older women: a randomized clinical trial. *JAMA internal medicine*.  
43 2015 May;175(5):703-11.
- 44 28. Witham MD, Price RJ, Struthers AD, Donnan PT, Messow CM, Ford I, et al. Cholecalciferol  
45 treatment to reduce blood pressure in older patients with isolated systolic hypertension: the VitDISH  
46 randomized controlled trial. *JAMA internal medicine*. 2013 Oct 14;173(18):1672-9.
- 47  
48  
49  
50  
51  
52  
53  
54  
55  
56  
57  
58  
59

1  
2  
3 29. Xue Y, Hu Y, Wang O, Wang C, Han G, Shen Q, et al. Effects of Enhanced Exercise and Combined  
4 Vitamin D and Calcium Supplementation on Muscle Strength and Fracture Risk in Postmenopausal  
5 Chinese Women. Zhongguo yi xue ke xue yuan xue bao Acta Academiae Medicinae Sinicae. 2017 Jun  
6 20;39(3):345-51.  
7  
8  
9  
10  
11  
12  
13  
14  
15  
16  
17  
18  
19  
20  
21  
22  
23  
24  
25  
26  
27  
28  
29  
30  
31  
32  
33  
34  
35  
36  
37  
38  
39  
40  
41  
42  
43  
44  
45  
46  
47  
48  
49  
50  
51  
52  
53  
54  
55  
56  
57  
58  
59  
60

| Source                                          | Treatment |                                                              | No. of Participants |              |                    |
|-------------------------------------------------|-----------|--------------------------------------------------------------|---------------------|--------------|--------------------|
|                                                 | Duration  | Intervention                                                 | Total Fracture      | Hip fracture | Vertebral Fracture |
| Avenell et al, 2004<br>(United Kingdom)[1]      | 3.8 y     | Calcium(1 g/d) (n = 29)                                      | 4                   | 1            | 0                  |
|                                                 |           | D <sub>3</sub> ( 800IU/d) (n = 35)                           | 3                   | 0            | 0                  |
|                                                 |           | Calcium (1g/d) + D <sub>3</sub><br>(800IU/d) (n = 35)        | 2                   | 1            | 0                  |
|                                                 |           | No treatment (n = 35)                                        | 4                   | 1            | 1                  |
| Baron et al, 1999<br>(United States)[2]         | 4 y       | Calcium: 1.2 g/d (n = 464)                                   | 4                   | 1            |                    |
|                                                 |           | Placebo (n = 466)                                            | 14                  | 0            |                    |
| Dawson-Hughes et al, 1997<br>(United States)[3] | 3 y       | Calcium (0.5g/d) + D <sub>3</sub><br>(700IU/d) (n = 187)     |                     | 0            |                    |
|                                                 |           | Placebo (n = 202)                                            |                     | 1            |                    |
| Glendenning et al, 2012<br>(Australia)[4]       | 9 mo      | D <sub>3</sub> (150000 IU every 3 mo)<br>(n = 353)           | 10                  | 0            |                    |
|                                                 |           | Placebo (n = 333)                                            | 10                  | 1            |                    |
| Grant et al, 2005<br>(United Kingdom)[5]        | 2-5 y     | Calcium(1 g/d) (n = 1311)                                    | 166                 | 49           | 3                  |
|                                                 |           | D <sub>3</sub> ( 800IU/d) (n = 1343)                         | 188                 | 47           | 4                  |
|                                                 |           | Calcium (1g/d) + D <sub>3</sub><br>(800IU/d) (n = 1306)      | 165                 | 46           | 0                  |
|                                                 |           | Placebo (n = 1332)                                           | 179                 | 41           | 1                  |
| Hansson and Roos, 1987<br>(Sweden)[6]           | 3 y       | Calcium (1g/d) (n = 25)                                      |                     |              | 1                  |
|                                                 |           | Placebo (n = 25)                                             |                     |              | 1                  |
| Harwood et al, 2004<br>(United Kingdom)[7]      | 1 y       | D <sub>3</sub> (300000 IU once) (n = 38)                     | 0                   | 0            |                    |
|                                                 |           | Calcium (1g/d) + D <sub>2</sub><br>(300000 IU once) (n = 36) | 6                   | 1            |                    |
|                                                 |           | Calcium (1g/d) + D <sub>3</sub><br>(800IU/d) (n = 39)        |                     |              |                    |
|                                                 |           | No treatment (n = 37)                                        | 5                   | 1            |                    |
| Hin et al, 2017<br>(United Kingdom)[8]          | 1 y       | D <sub>3</sub> (4000 IU/d)(n = 102)                          | 6                   |              |                    |
|                                                 |           | D <sub>3</sub> (2000 IU/d)(n = 102)                          |                     |              |                    |
|                                                 |           | Placebo (n = 101)                                            | 1                   |              |                    |

|                                                             |           |                                                        |     |    |    |
|-------------------------------------------------------------|-----------|--------------------------------------------------------|-----|----|----|
| <b>Inkovaara et al, 1983</b><br><b>(Finland)[9]</b>         | 9 mo      | Calcium (1.2 g/d) (n = 42)                             | 1   |    |    |
|                                                             |           | D <sub>3</sub> (1000 IU/d) (n = 45)                    | 1   |    |    |
|                                                             |           | Calcium (1.2g/d) + D <sub>3</sub> (1000 IU/d) (n = 46) | 0   |    |    |
|                                                             |           | Placebo (n = 42)                                       | 3   |    |    |
| <b>Jackson et al, 2006</b><br><b>(United States)[10]</b>    | 7 y       | Calcium (1g/d) + D <sub>3</sub> (400 IU/d) (n = 4015)  |     | 70 |    |
|                                                             |           | Placebo (n = 3957)                                     |     | 61 |    |
| <b>Lips et al, 1996</b><br><b>(The Netherlands)[11]</b>     | 3-4 y     | 400 IU/d (n = 1291)                                    | 135 | 58 |    |
|                                                             |           | Placebo (n = 1287)                                     | 122 | 48 |    |
| <b>Liu et al, 2015</b><br><b>(China)[12]</b>                | 1 y       | Calcium (1.5g/d) + D <sub>3</sub> (600 IU/d) (n = 50)  | 1   |    |    |
|                                                             |           | Placebo (n = 48)                                       | 2   |    |    |
| <b>Massart et al, 2014</b><br><b>(Belgium)[13]</b>          | 3 mo      | D <sub>3</sub> (25000 IU every week ) (n = 26)         | 0   |    |    |
|                                                             |           | Placebo (n = 29)                                       | 5   |    |    |
| <b>Mitri et al, 2011</b><br><b>(United States)[14]</b>      | 4 mo      | D <sub>3</sub> (2000 IU/d)(n = 23)                     | 1   |    |    |
|                                                             |           | Placebo (n = 24)                                       | 0   |    |    |
| <b>Peacock et al, 2000</b><br><b>(United States)[15]</b>    | 4 y       | Calcium (0.75g/d) (n = 126)                            |     | 7  |    |
|                                                             |           | Placebo (n = 135)                                      |     | 13 |    |
| <b>Porthouse et al, 2005</b><br><b>(United Kingdom)[16]</b> | 1.5-3.5 y | Calcium (1g/d) + D <sub>3</sub> (800 IU/d) (n = 1321)  | 58  | 8  |    |
|                                                             |           | No treatment (n = 1993)                                | 91  | 17 |    |
| <b>Prince et al, 2006</b><br><b>(Australia)[17]</b>         | 5 y       | Calcium (0.48g/d) (n = 730)                            | 110 | 11 | 38 |
|                                                             |           | Placebo (n = 730)                                      | 126 | 6  | 39 |
| <b>Punthakee et al, 2012</b><br><b>(Canada)[18]</b>         | 4 mo      | D <sub>3</sub> (1000 IU/d) (n = 607)                   | 3   |    |    |
|                                                             |           | Placebo (n = 614)                                      | 3   |    |    |
| <b>Recker et al, 1996</b><br><b>(United States)[19]</b>     | 4 y       | Calcium (1.2 g/d) (n = 95)                             |     | 27 |    |
|                                                             |           | Placebo (n = 102)                                      |     | 34 |    |
| <b>Reid et al, 1993</b><br><b>(New Zealand)[20]</b>         | 4 y       | Calcium (1 g/d) (n = 68)                               | 2   | 0  | 0  |
|                                                             |           | Placebo (n = 67)                                       | 7   | 2  | 1  |
| <b>Reid et al, 2006</b><br><b>(New Zealand)[21]</b>         | 5 y       | Calcium (1 g/d) (n = 732)                              | 134 | 17 | 27 |
|                                                             |           | Placebo (n = 739)                                      | 147 | 5  | 38 |
| <b>Riggs et al, 1998</b>                                    | 4 y       | Calcium (1.6 g/d) (n = 119)                            |     | 8  |    |



|  |       |                                                     |                                                           |     |    |
|--|-------|-----------------------------------------------------|-----------------------------------------------------------|-----|----|
|  |       | <b>(United States)[22]</b>                          | Placebo (n = 117)                                         |     | 9  |
|  |       |                                                     |                                                           |     |    |
|  | 3 y   | <b>Salovaara et al, 2010<br/>(Finland)[23]</b>      | Calcium(1g/d) + D <sub>3</sub><br>(800 IU/d) (n = 1718)   | 78  | 4  |
|  |       |                                                     | No treatment (n = 1714)                                   | 94  | 2  |
|  |       |                                                     |                                                           |     | 13 |
|  | 3-5 y | <b>Sanders et al, 2010<br/>(Australia)[24]</b>      | D <sub>3</sub> (500000 IU every year)<br>(n = 1131)       | 155 | 19 |
|  |       |                                                     | Placebo (n = 1127)                                        | 125 | 15 |
|  | 3 y   | <b>Smith et al, 2007<br/>(United Kingdom)[25]</b>   | D <sub>3</sub> (300000 IU every year)<br>(n = 4727)       |     | 66 |
|  |       |                                                     | Placebo (n = 4713)                                        |     | 44 |
|  | 5 y   | <b>Trivedi et al, 2003<br/>(United Kingdom)[26]</b> | D <sub>3</sub> (100000 IU every 4 mo)<br>(n = 1345)       | 119 | 21 |
|  |       |                                                     | Placebo (n = 1341)                                        | 149 | 24 |
|  |       |                                                     |                                                           |     | 28 |
|  | 2 y   | <b>Uusi-Rasi et al, 2015<br/>(Finland)[27]</b>      | D <sub>3</sub> (800 IU/d) (n = 102)                       | 6   | 2  |
|  |       |                                                     | Placebo (n = 102)                                         | 6   | 0  |
|  | 1 y   | <b>Witham et al, 2013<br/>(United Kingdom)[28]</b>  | D <sub>3</sub> (100000 IU every 3 mo)<br>(n = 80)         | 2   |    |
|  |       |                                                     | Placebo (n = 79)                                          | 3   |    |
|  | 1 y   | <b>Xue et al, 2017<br/>(China)[29]</b>              | Calcium (0.6g/d) + D <sub>3</sub> (800<br>IU/d) (n = 139) | 3   |    |
|  |       |                                                     | Placebo (n = 173)                                         | 2   |    |

### Supplementary Table 2. The detailed data of outcomes

1. Avenell A, Grant AM, McGee M, McPherson G, Campbell MK, McGee MA. The effects of an open design on trial participant recruitment, compliance and retention--a randomized controlled trial comparison with a blinded, placebo-controlled design. *Clinical trials* (London, England). 2004;1(6):490-8.
2. Baron JA, Beach M, Mandel JS, van Stolk RU, Haile RW, Sandler RS, et al. Calcium supplements for the prevention of colorectal adenomas. Calcium Polyp Prevention Study Group. *The New England journal of medicine*. 1999 Jan 14;340(2):101-7.
3. Dawson-Hughes B, Harris SS, Krall EA, Dallal GE. Effect of calcium and vitamin D supplementation on bone density in men and women 65 years of age or older. *The New England journal of medicine*. 1997 Sep 4;337(10):670-6.
4. Glendenning P, Zhu K, Inderjeeth C, Howat P, Lewis JR, Prince RL. Effects of three-monthly oral 150,000 IU cholecalciferol supplementation on falls, mobility, and muscle strength in older postmenopausal women: a randomized controlled trial. *Journal of bone and mineral research : the official journal of the American Society for Bone and Mineral Research*. 2012 Jan;27(1):170-6.

- 1
  - 2
  - 3
  - 4
  - 5
  - 6
  - 7
  - 8
  - 9
  - 10
  - 11
  - 12
  - 13
  - 14
  - 15
  - 16
  - 17
  - 18
  - 19
  - 20
  - 21
  - 22
  - 23
  - 24
  - 25
  - 26
  - 27
  - 28
  - 29
  - 30
  - 31
  - 32
  - 33
  - 34
  - 35
  - 36
  - 37
  - 38
  - 39
  - 40
  - 41
  - 42
  - 43
  - 44
  - 45
  - 46
  - 47
  - 48
  - 49
  - 50
  - 51
  - 52
  - 53
  - 54
  - 55
  - 56
  - 57
  - 58
  - 59
  - 60
5. Grant AM, Avenell A, Campbell MK, McDonald AM, MacLennan GS, McPherson GC, et al. Oral vitamin D3 and calcium for secondary prevention of low-trauma fractures in elderly people (Randomised Evaluation of Calcium Or vitamin D, RECORD): a randomised placebo-controlled trial. *Lancet* (London, England). 2005 May 7-13;365(9471):1621-8.
6. Hansson T, Roos B. The effect of fluoride and calcium on spinal bone mineral content: a controlled, prospective (3 years) study. *Calcified tissue international*. 1987 Jun;40(6):315-7.
7. Harwood RH, Sahota O, Gaynor K, Masud T, Hosking DJ. A randomised, controlled comparison of different calcium and vitamin D supplementation regimens in elderly women after hip fracture: The Nottingham Neck of Femur (NoNOF) study. *Age and ageing*. 2004;33(1):45-51.
8. Hin H, Tomson J, Newman C, Kurien R, Lay M, Cox J, et al. Optimum dose of vitamin D for disease prevention in older people: BEST-D trial of vitamin D in primary care. *Osteoporosis International*. 2017;28(3):841-51.
9. Inkovaara J, Gothoni G, Halttula R. Calcium, vitamin D and anabolic steroid in treatment of aged bones: Double-blind placebo-controlled long-term clinical trial. *Age and ageing*. 1983;12(2):124-30.
10. Jackson RD, LaCroix AZ, Gass M, Wallace RB, Robbins J, Lewis CE, et al. Calcium plus vitamin D supplementation and the risk of fractures. *New England Journal of Medicine*. 2006;354(7):669-83.
11. Lips P, Graafmans WC, Ooms ME, Bezemer PD, Bouter LM. Vitamin D supplementation and fracture incidence in elderly persons: A randomized, placebo-controlled clinical trial. *Annals of internal medicine*. 1996;124(4):400-6.
12. Liu BX, Chen SP, Li YD, Wang J, Zhang B, Lin Y, et al. The Effect of the Modified Eighth Section of Eight-Section Brocade on Osteoporosis in Postmenopausal Women: A Prospective Randomized Trial. *Medicine*. 2015 Jun;94(25):e991.
13. Massart A, Debelle FD, Racape J, Gervy C, Husson C, Dhaene M, et al. Biochemical parameters after cholecalciferol repletion in hemodialysis: results From the VitaDial randomized trial. *American journal of kidney diseases : the official journal of the National Kidney Foundation*. 2014 Nov;64(5):696-705.
14. Mitri J, Dawson-Hughes B, Hu FB, Pittas AG. Effects of vitamin D and calcium supplementation on pancreatic beta cell function, insulin sensitivity, and glycemia in adults at high risk of diabetes: the Calcium and Vitamin D for Diabetes Mellitus (CaDDM) randomized controlled trial. *The American journal of clinical nutrition*. 2011 Aug;94(2):486-94.
15. Peacock M, Liu G, Carey M, McClintock R, Ambrosius W, Hui S, et al. Effect of calcium or 25OH vitamin D3 dietary supplementation on bone loss at the hip in men and women over the age of 60. *The Journal of clinical endocrinology and metabolism*. 2000 Sep;85(9):3011-9.
16. Porthouse J, Cockayne S, King C, Saxon L, Steele E, Aspray T, et al. Randomised controlled trial of calcium and supplementation with cholecalciferol (vitamin D3) for prevention of fractures in primary care. *BMJ (Clinical research ed)*. 2005 Apr 30;330(7498):1003.
17. Prince RL, Devine A, Dhaliwal SS, Dick IM. Effects of calcium supplementation on clinical fracture and bone structure: Results of a 5-year, double-blind, placebo-controlled trial in elderly women. *Archives of internal medicine*. 2006;166(8):869-75.
18. Punthakee Z, Bosch J, Dagenais G, Diaz R, Holman R, Probstfield JL, et al. Design, history and results of the Thiazolidinedione Intervention with vitamin D Evaluation (TIDE) randomised controlled trial. *Diabetologia*. 2012;55(1):36-45.
19. Recker RR, Hinders S, Davies KM, Heaney RP, Stegman MR, Lappe JM, et al. Correcting calcium nutritional deficiency prevents spine fractures in elderly women. *Journal of bone and mineral*

1  
2  
3 research : the official journal of the American Society for Bone and Mineral Research. 1996  
4 Dec;11(12):1961-6.

5 20. Reid IR, Ames RW, Evans MC, Gamble GD, Sharpe SJ. Effect of calcium supplementation on bone  
6 loss in postmenopausal women. *The New England journal of medicine*. 1993 Feb 18;328(7):460-4.

7 21. Reid IR, Mason B, Horne A, Ames R, Reid HE, Bava U, et al. Randomized Controlled Trial of  
8 Calcium in Healthy Older Women. *American Journal of Medicine*. 2006;119(9):777-85.

9 22. Riggs BL, O'Fallon WM, Muhs J, O'Connor MK, Kumar R, Melton LJ, 3rd. Long-term effects of  
10 calcium supplementation on serum parathyroid hormone level, bone turnover, and bone loss in  
11 elderly women. *Journal of bone and mineral research : the official journal of the American Society for*  
12 *Bone and Mineral Research*. 1998 Feb;13(2):168-74.

13 23. Salovaara K, Tuppurainen M, Kärkkäinen M, Rikkonen T, Sandini L, Sirola J, et al. Effect of vitamin  
14 D3 and calcium on fracture risk in 65- to 71-year-old women: A population-based 3-year randomized,  
15 controlled trial - The OSTPRE-FPS. *Journal of Bone and Mineral Research*. 2010;25(7):1487-95.

16 24. Sanders KM, Stuart AL, Williamson EJ, Simpson JA, Kotowicz MA, Young D, et al. Annual high-dose  
17 oral vitamin D and falls and fractures in older women: A randomized controlled trial. *JAMA - Journal of*  
18 *the American Medical Association*. 2010;303(18):1815-22.

19 25. Smith H, Anderson F, Raphael H, Maslin P, Crozier S, Cooper C. Effect of annual intramuscular  
20 vitamin D on fracture risk in elderly men and women - A population-based, randomized, double-blind,  
21 placebo-controlled trial. *Rheumatology*. 2007;46(12):1852-7.

22 26. Trivedi DP, Doll R, Khaw KT. Effect of four monthly oral vitamin D3 (cholecalciferol)  
23 supplementation on fractures and mortality in men and women living in the community: randomised  
24 double blind controlled trial. *BMJ (Clinical research ed)*. 2003 Mar 1;326(7387):469.

25 27. Uusi-Rasi K, Patil R, Karinkanta S, Kannus P, Tokola K, Lamberg-Allardt C, et al. Exercise and  
26 vitamin D in fall prevention among older women: a randomized clinical trial. *JAMA internal medicine*.  
27 2015 May;175(5):703-11.

28 28. Witham MD, Price RJ, Struthers AD, Donnan PT, Messow CM, Ford I, et al. Cholecalciferol  
29 treatment to reduce blood pressure in older patients with isolated systolic hypertension: the VitDISH  
30 randomized controlled trial. *JAMA internal medicine*. 2013 Oct 14;173(18):1672-9.

31 29. Xue Y, Hu Y, Wang O, Wang C, Han G, Shen Q, et al. Effects of Enhanced Exercise and Combined  
32 Vitamin D and Calcium Supplementation on Muscle Strength and Fracture Risk in Postmenopausal  
33 Chinese Women. *Zhongguo yi xue ke xue yuan xue bao Acta Academiae Medicinae Sinicae*. 2017 Jun  
34 20;39(3):345-51.  
35  
36  
37  
38  
39  
40  
41  
42  
43  
44  
45  
46  
47  
48  
49  
50  
51  
52  
53  
54  
55  
56  
57  
58  
59  
60

# BMJ Open

## Comparison of fracture risk using different supplemental doses of vitamin D, calcium or their combination: a network meta-analysis of randomized controlled trials

|                               |                                                                                                                                                                                                                                                                                                                                                                                                                                                                                                                                                                                                                                                                                                                                                                                                                                                                                                                                                                                                                                                                                                                                                                                                                                                                                                                                                                                                                                                                                                                                                                                                                                                                                                                                                                                                                                                                                                                                                                                                                                                                                                                                                                                                                                                                                                                                         |
|-------------------------------|-----------------------------------------------------------------------------------------------------------------------------------------------------------------------------------------------------------------------------------------------------------------------------------------------------------------------------------------------------------------------------------------------------------------------------------------------------------------------------------------------------------------------------------------------------------------------------------------------------------------------------------------------------------------------------------------------------------------------------------------------------------------------------------------------------------------------------------------------------------------------------------------------------------------------------------------------------------------------------------------------------------------------------------------------------------------------------------------------------------------------------------------------------------------------------------------------------------------------------------------------------------------------------------------------------------------------------------------------------------------------------------------------------------------------------------------------------------------------------------------------------------------------------------------------------------------------------------------------------------------------------------------------------------------------------------------------------------------------------------------------------------------------------------------------------------------------------------------------------------------------------------------------------------------------------------------------------------------------------------------------------------------------------------------------------------------------------------------------------------------------------------------------------------------------------------------------------------------------------------------------------------------------------------------------------------------------------------------|
| Journal:                      | <i>BMJ Open</i>                                                                                                                                                                                                                                                                                                                                                                                                                                                                                                                                                                                                                                                                                                                                                                                                                                                                                                                                                                                                                                                                                                                                                                                                                                                                                                                                                                                                                                                                                                                                                                                                                                                                                                                                                                                                                                                                                                                                                                                                                                                                                                                                                                                                                                                                                                                         |
| Manuscript ID                 | bmjopen-2018-024595.R1                                                                                                                                                                                                                                                                                                                                                                                                                                                                                                                                                                                                                                                                                                                                                                                                                                                                                                                                                                                                                                                                                                                                                                                                                                                                                                                                                                                                                                                                                                                                                                                                                                                                                                                                                                                                                                                                                                                                                                                                                                                                                                                                                                                                                                                                                                                  |
| Article Type:                 | Original research                                                                                                                                                                                                                                                                                                                                                                                                                                                                                                                                                                                                                                                                                                                                                                                                                                                                                                                                                                                                                                                                                                                                                                                                                                                                                                                                                                                                                                                                                                                                                                                                                                                                                                                                                                                                                                                                                                                                                                                                                                                                                                                                                                                                                                                                                                                       |
| Date Submitted by the Author: | 10-Jan-2019                                                                                                                                                                                                                                                                                                                                                                                                                                                                                                                                                                                                                                                                                                                                                                                                                                                                                                                                                                                                                                                                                                                                                                                                                                                                                                                                                                                                                                                                                                                                                                                                                                                                                                                                                                                                                                                                                                                                                                                                                                                                                                                                                                                                                                                                                                                             |
| Complete List of Authors:     | <p>Hu, Zhi-Chao; The Second Affiliated Hospital and Yuying Children's Hospital of Wenzhou Medical University, Second Medical School of Wenzhou Medical University, Wenzhou, Zhejiang, China, Department of Orthopedics</p> <p>Tang, Qian; The Second Affiliated Hospital and Yuying Children's Hospital of Wenzhou Medical University, Second Medical School of Wenzhou Medical University, Wenzhou, Zhejiang, China, Department of Orthopedics</p> <p>Sang , Chang-Min ; Department of Orthopaedics, The Affiliated Hospital of Jiujiang Medical College, Jiujiang, Jiangxi, 332000, China., Department of Orthopaedics</p> <p>Tang, Li; The Second Affiliated Hospital and Yuying Children's Hospital of Wenzhou Medical University, Second Medical School of Wenzhou Medical University, Wenzhou, Zhejiang, China, Department of Orthopedics</p> <p>Li, Xiaobin; The Second Affiliated Hospital and Yuying Children's Hospital of Wenzhou Medical University</p> <p>Zheng, Gang; The Second Affiliated Hospital and Yuying Children's Hospital of Wenzhou Medical University, Second Medical School of Wenzhou Medical University, Wenzhou, Zhejiang, China, Department of Orthopedics</p> <p>Feng, Zhen-Hua; The Second Affiliated Hospital and Yuying Children's Hospital of Wenzhou Medical University, Second Medical School of Wenzhou Medical University, Wenzhou, Zhejiang, China, Department of Orthopedics</p> <p>Xuan, Jiang-Wei; The Second Affiliated Hospital and Yuying Children's Hospital of Wenzhou Medical University, Second Medical School of Wenzhou Medical University, Wenzhou, Zhejiang, China, Department of Orthopedics</p> <p>Shen, Zhi-Hao; Department of Orthopaedics, The Second Affiliated Hospital and Yuying Children's Hospital of Wenzhou Medical University, Wenzhou, Zhejiang, 325027, China.; Hainan Medical College, Haikou, Hainan, China.</p> <p>Shen, Li-Yan; The Second Affiliated Hospital and Yuying Children's Hospital of Wenzhou Medical University, Second Medical School of Wenzhou Medical University, Wenzhou, Zhejiang, China, Department of Orthopedics</p> <p>Ni, Wenfei; 1. Department of Orthopaedics, The Second Affiliated Hospital and Yuying Children's Hospital of Wenzhou Medical University, Wenzhou, Zhejiang, 325027, China. 2. The Second School of Medicine,</p> |

|                                    |                                                                                                                                                                                                                                                                                                                                                                                                     |
|------------------------------------|-----------------------------------------------------------------------------------------------------------------------------------------------------------------------------------------------------------------------------------------------------------------------------------------------------------------------------------------------------------------------------------------------------|
|                                    | Wenzhou Medical University, Wenzhou, Zhejiang, 325027, China. 3. Bone Research Institute, The Key Orthopaedic Laboratory of Zhejiang Province, Wenzhou, Zhejiang, 325027, China., Wu, Ai-Min; The Second Affiliated Hospital and Yuying Children's Hospital of Wenzhou Medical University, Second Medical School of Wenzhou Medical University, Wenzhou, Zhejiang, China, Department of Orthopedics |
| <b>Primary Subject Heading</b> :   | Nutrition and metabolism                                                                                                                                                                                                                                                                                                                                                                            |
| <b>Secondary Subject Heading</b> : | Diabetes and endocrinology, Nutrition and metabolism                                                                                                                                                                                                                                                                                                                                                |
| <b>Keywords</b> :                  | Calcium, Vitamin D, Fractures, network meta-analysis                                                                                                                                                                                                                                                                                                                                                |
|                                    |                                                                                                                                                                                                                                                                                                                                                                                                     |

SCHOLARONE™  
Manuscripts

1  
2  
3  
4 1 **Comparison of fracture risk using different supplemental doses of vitamin D, calcium or their**  
5  
6 2 **combination: a network meta-analysis of randomized controlled trials**  
7  
8

9 3 Zhi-Chao Hu<sup>1,2,3</sup>, Qian Tang<sup>1,2,3</sup>, Chang-Min Sang<sup>4</sup>, Li Tang<sup>1,2,3</sup>, Xiao-Bin Li<sup>1,2,3</sup>, Gang Zheng<sup>1,2,3</sup>,  
10  
11 4 Zhen-Hua Feng<sup>1,2,3</sup>, Jiang-Wei Xuan<sup>1,2,3</sup>, Zhi-Hao Shen<sup>1,2,3</sup>, Li-Yan Shen<sup>1,2,3,\*</sup>, Wen-Fei Ni<sup>1,2,3,\*</sup> and  
12  
13  
14 5 Ai-Min Wu<sup>1,2,3,\*</sup>  
15  
16

17  
18  
19 7 **Affiliations:**  
20

- 21  
22 8 1. Department of Orthopaedics, The Second Affiliated Hospital and Yuying Children's Hospital of  
23  
24 9 Wenzhou Medical University, Wenzhou, Zhejiang, 325027, China.  
25  
26  
27 10 2. The Second School of Medicine, Wenzhou Medical University, Wenzhou, Zhejiang, 325027, China.  
28  
29  
30 11 3. Bone Research Institute, The Key Orthopaedic Laboratory of Zhejiang Province, Wenzhou,  
31  
32 12 Zhejiang, 325027, China.  
33  
34  
35 13 4. Department of Orthopaedics, The Affiliated Hospital of Jiujiang Medical College, Jiujiang, Jiangxi,  
36  
37 14 332000, China.  
38  
39

40 15 **\*Correspondence author:**  
41

42  
43 16 Ai-Min Wu, **email:** aiminwu@wmu.edu.cn  
44

45 17 Wen-Fei Ni, **email:** wenfeini@yeah.net  
46

47  
48 18 Li-Yan Shen, **email:** shenliyan@wmu.edu.cn  
49

50 19 **Phone:** +86 0577 88002814;  
51

52  
53 20 **Fax:** +86 057788002823;  
54  
55

56 21

57  
58 22 Zhi-Chao Hu and Qian Tang contributed equally to this work.  
59  
60

1  
2  
3  
4 23 **Abstract**

5  
6 24 **Objective** Inconsistent findings in regard to association between different concentrations of vitamin D,  
7  
8  
9 25 calcium or their combination and the risk of fracture have been reported during the past decade in  
10  
11 26 community-dwelling older people. This study was designed to compare the fracture risk using different  
12  
13  
14 27 concentrations of vitamin D, calcium or their combination.

15  
16  
17 28 **Design** A systematic review and network meta-analysis.

18  
19 29 **Data sources** Randomized controlled trials in PubMed, Cochrane library, and EMBASE databases  
20  
21  
22 30 were systematically searched from the inception dates to December 31, 2017.

23  
24  
25 31 **Outcomes** Total fracture was defined as the primary outcome. Secondary outcomes were hip fracture  
26  
27 32 and vertebral fracture. Due to the consistency of the original studies, a consistency model was adopted.

28  
29  
30 33 **Results** A total of 25 randomized controlled trials involving 43510 participants fulfilled the inclusion  
31  
32 34 criteria. There was no evidence that the risk of total fracture was reduced by using different  
33  
34  
35 35 concentrations of vitamin D, calcium or their combination compared with placebo or no treatment. No  
36  
37 36 significant associations were found between calcium, vitamin D, or combined calcium and vitamin D  
38  
39  
40 37 supplements and the incidence of hip, or vertebral fractures.

41  
42  
43 38 **Conclusions** The use of supplements that included calcium, vitamin D, or both was not found to be  
44  
45 39 better than placebo or no treatment in terms of risk of fractures among community-dwelling older  
46  
47  
48 40 adults. It means the routine use of these supplements in community-dwelling older people should be  
49  
50  
51 41 treated more carefully.

52  
53 42 **Prospero registration number** CRD42017079624

54  
55  
56 43 **Keywords:** Calcium; Vitamin D; Fractures; network meta-analysis

57  
58 44 **Strengths and limitations of this study**  
59  
60

- 1  
2  
3  
4 45 • This systematic review and meta-analysis combined the evidence from randomized controlled trials.  
5  
6 46 • Our findings may not support the routine use of these supplements in community-dwelling older  
7  
8  
9 47 people.  
10  
11 48 • This work does not necessarily preclude any benefit of vitamin D and calcium supplementation in  
12  
13  
14 49 older, frail individuals.  
15  
16  
17 50 • Potential missing data and meta-biases, heterogeneity, which may limit the quality of evidence.  
18

## 19 51 **Introduction**

22 52 Clinical fractures of the elderly represent a worldwide public health problem that leads to illness and  
23  
24 53 social burden. The patients with osteoporosis in the European Union were estimated to be 27.5 million  
25  
26  
27 54 in 2010, and 3.5 million new fragility fractures were sustained<sup>1</sup>. In Asia, the average cost of  
28  
29  
30 55 osteoporotic fractures accounted for 18.95% of the countries' 2014 gross domestic product  
31  
32 56 (GDP)/capita and increased annually<sup>2-4</sup>. The overall prevalence of osteoporosis or low bone mass in  
33  
34  
35 57 non-institutional population over the age of 50 in the USA was estimated at 10.3% and 43.9%,  
36  
37  
38 58 respectively, which means that 10.2 million elderly people had osteoporosis and 43.4 million people  
39  
40 59 had low bone mass in 2010<sup>5</sup>. With the demographic trend of ageing and the predicted increase in life  
41  
42  
43 60 expectancy, the cost of fracture treatment is expected to rise.

45 61 Dietary allowances for calcium range from 700 to 1200 mg/d and vitamin D of 600-800 IU/d have  
46  
47  
48 62 long been recommended for the prevention of osteoporotic fractures in the elderly<sup>6 7</sup>. The supplements  
49  
50  
51 63 of calcium and vitamin D are commonly taken to maintain bone health.

53 64 However, the previous randomized controlled trials (RCT) and meta-analyses concerning vitamin D,  
54  
55  
56 65 calcium, or their combination for fractures yielded different efficacy outcomes. For instance, two  
57  
58  
59 66 meta-analyses demonstrated calcium or vitamin D supplementation alone has a small benefit on bone  
60



1  
2  
3  
4 67 mineral density (BMD), but no clinically important to prevent fractures<sup>8 9</sup>, while an updated  
5  
6 68 meta-analysis and a pooled analysis found calcium plus vitamin D supplementation can significantly  
7  
8  
9 69 reduce hip fractures by 30% and total fractures by 15%<sup>10 11</sup>. Two RCTs reported that low dose of  
10  
11 70 vitamin D supplementation (less than 800 IU/d) can reduce the incidence of falls<sup>12</sup> and may prevent  
12  
13  
14 71 fractures without adverse effects<sup>13</sup>, but other RCTs showed no significant reduction in the incidence of  
15  
16  
17 72 hip or other peripheral fractures<sup>14 15</sup> and its possible effects were seen only in patients with initial  
18  
19  
20 73 calcium insufficiency. Based on the evidence from meta-analysis, Bischoff-Ferrari et al <sup>16</sup> illustrated  
21  
22 74 that high-dose vitamin D supplementation (800 IU/d or higher) not only reduced the risk of falls and  
23  
24  
25 75 hip fractures, but also prevented non-vertebral fractures. In contrast, a study reported annual high-dose  
26  
27 76 oral vitamin D resulted in an increased risk of falls and fractures <sup>17</sup>. On the other hand, low-dose  
28  
29  
30 77 calcium supplementation (less than 800mg/d) effectively led to a sustained reduction in the rate of bone  
31  
32  
33 78 loss <sup>18</sup> and turnover. Although it was also reported that the high dose of calcium (800 mg/d or higher)  
34  
35  
36 79 was associated with a lower risk of clinical fractures <sup>19</sup>. The high-dose calcium with high-dose vitamin  
37  
38 80 D can't prevent fractures according to the evidence from reported RCT <sup>20</sup>, but a meta-analysis  
39  
40  
41 81 supported their combination can prevent bone loss and significantly reduce the risk of hip fractures and  
42  
43  
44 82 all osteoporotic fractures <sup>21</sup>. Thus, it's challenging to conclude a dose-response relation between the  
45  
46  
47 83 intakes of vitamin D, calcium, or their combination and the main outcomes in these heterogeneous  
48  
49  
50 84 literatures.

51 85 Therefore, this study was designed to compare the fracture risk using different concentrations of  
52  
53  
54 86 vitamin D, calcium or their combination, and comprehensively evaluate the optimal concentration to  
55  
56  
57 87 guide clinical practice and public prevention in community-dwelling older people.

## 58 88 **Methods**

## 89 Search strategy and selection criteria

90 This review and meta-analysis is based on the Preferred Reporting Items for Systematic Reviews and  
91 Meta-Analysis (PRISMA) extension statement for network meta-analysis. Our meta-analysis was  
92 registered prospectively in PROSPERO (CRD42017079624) and the Checklist PRISMA 2009  
93 (Supplementary Table 1) will be used and check our final reports <sup>22</sup>.

94 We restricted our meta-analysis to the inclusion criteria should meet following details: (1) RCTs; (2)  
95 Interventions must be one of the following three: vitamin D only, calcium only, both vitamin D and  
96 calcium; (3) Complete outcome data of fracture; (4) Trials enrolling adults older than 50 years and  
97 living in their communities; (5) Only studies that lasted more than a year. Exclusion criteria were (1)  
98 Calcium or vitamin D combined with other therapies (eg: hormones, exercise); (2) Trials in which  
99 vitamin D analogues (eg: calcitriol) or hydroxylated vitamin D were used; (3) Trials in which dietary  
100 intake of calcium or vitamin D (eg: from milk) was evaluated; (4) Patients suffering from illness or  
101 long-term use of certain drugs affecting the stability of the calcium metabolism, such as metabolic bone  
102 disease, bone tumour, treatment of steroids and so on.

103 Participants must be randomly assigned to two or more following groups: (1) high calcium (800  
104 mg/d or higher) only; (2) low calcium (less than 800 mg/d) only; (3) high vitamin D (800 IU/d or  
105 higher) only; (4) low vitamin D (less than 800 IU/d) only; (5) high calcium (800 mg/d or higher) + high  
106 vitamin D (800 IU/d or higher); (6) high calcium + low vitamin D (less than 800 IU/d); (7) low calcium  
107 (less than 800 mg/d) + high vitamin D; (8) low calcium + low vitamin D; (9) placebo. The  
108 interventions should be compared with placebo.

109 Two authors (ZHF and GZ) independently searched the electronic literature database of PubMed,  
110 Embase, Cochrane database on December 31, 2017 (detailed search strategies are reported

1  
2  
3  
4 111 in **supplementary eTable 1**). Related articles and reference lists were searched to avoid original  
5  
6  
7 112 miss. The reference studies of previous systematic reviews, meta-analysis, and included studies were  
8  
9  
10 113 manually searched to avoid initial miss. After 2 authors assessed the potentially eligible studies  
11  
12 114 independently, any disagreement was discussed and resolved with the third independent author (QT).

#### 13 14 115 **Data collection and assessment of risk of bias**

15  
16  
17 116 Two reviewers (ZHS and XBL) independently extracted data, and the third reviewer (LT) checked  
18  
19  
20 117 the consistency between them. A standard data extracted form was used at this stage, including the  
21  
22 118 authors, publishing date, country, participant characteristics; doses of calcium, vitamin D, or their  
23  
24  
25 119 combination; dietary calcium intake; baseline serum 25-hydroxyvitamin D concentration; and trial  
26  
27 120 duration. For continuous outcomes, the mean, SD (standard deviation) and participant number will be  
28  
29  
30 121 extracted. For dichotomous outcomes, we extracted the total numbers and the numbers of events of  
31  
32 122 both groups. The data in other forms was recalculated when possible to enable pooled analysis.

33  
34  
35 123 We used the Cochrane risk of bias tool to assess risk bias of included studies. The tool has seven  
36  
37  
38 124 domains including random sequence generation, allocation concealment, blinding of participants and  
39  
40  
41 125 personnel, blinding of outcome assessment, incomplete outcome data, selective reporting and other  
42  
43 126 bias. The classification of the judgment for each domain was low risk of bias, high risk of bias, or  
44  
45  
46 127 unclear risk of bias and two authors (ZHF and GZ) independently evaluated the risk of studies.

#### 47 48 128 **Data synthesis and statistical analysis**

49  
50  
51 129 The data was extracted and input into the STATA software (version 12.0; StataCorp, College  
52  
53  
54 130 Station, TX, USA) for network meta-analysis. And we generated network plots for each outcome to  
55  
56  
57 131 illustrate which interventions had been compared directly in the included studies. Network  
58  
59 132 meta-analysis is an extension of standard meta-analysis to compare multiple treatments based on  
60

1  
2  
3  
4 133 randomized controlled trial evidence, which forms a connected network of comparisons. Treatment  
5  
6 134 effect estimates from network meta-analysis exploit both the direct comparisons within trials and the  
7  
8  
9 135 indirect comparisons across trials. The heterogeneity was further assessed with the  $I^2$  statistic and a  
10  
11 136 value of more than 50% was considered as statistically significant heterogeneity. Random effects  
12  
13  
14 137 model was applied when significant heterogeneity existed ( $P < 0.05$  or  $I^2$  test exhibited  $> 50\%$ ),  
15  
16  
17 138 otherwise, fixed-effects model was utilized<sup>23</sup>. Relative risk (RR) with 95% confidence intervals (CIs)  
18  
19  
20 139 was calculated for dichotomous outcomes while weighted mean difference (WMD) with 95% CIs for  
21  
22 140 the continuous. Inconsistency refers to differences between direct and various indirect effect estimates  
23  
24  
25 141 for the same comparison. To assess inconsistency, we estimated the inconsistency factors in closed  
26  
27 142 loop based on the method described by Chaimani et al<sup>24</sup>. The heterogeneity in each closed loop was  
28  
29  
30 143 estimated by utilizing inconsistency factor (IF). If the 95% confidence intervals (95% CI) of IF values  
31  
32  
33 144 are not truncated at zero, it suggests that the inconsistency among studies has statistical significance.  
34  
35 145 We used the surface under the cumulative ranking probabilities (SUCRA) to indicate which treatment  
36  
37  
38 146 was the best one. The funnel plot was used to identify possible publication bias if the number of studies  
39  
40  
41 147 was larger than 10.

#### 42 43 148 **Patient and public involvement**

44  
45 149 No patients were involved in setting the research question or the outcome measures, and no patients  
46  
47  
48 150 were involved in developing plans for design or implementation of the study. Furthermore, no patients  
49  
50  
51 151 were asked to advice on interpretation or writing up of results. Since this meta-analysis used  
52  
53 152 aggregated data from previous trials, it is unable to disseminate the results of the research to study  
54  
55  
56 153 participants directly.

#### 57 58 154 **Result**

## 155 **Data Retrieval**

156 In summary, a total of 7909 potential records were initially identified through PubMed (5187),  
157 Embase (2688), Cochrane Data base (34). Based on our review of the title and abstract, 99 full-text  
158 papers were reviewed and 25 studies<sup>13 17 19 20 25-45</sup> met inclusion criteria (**Figure 1**).

## 159 **Study and Patient Characteristics**

160 The characteristics of all 25 included studies were summarized and shown in **supplementary Table**  
161 **2**. And the detailed data of outcomes was collected in **supplementary Table 3**. The papers had similar  
162 distributions of sex, age, country, intervention and all of them were community-dwelling older people.  
163 Hansson et al<sup>29</sup> did not report the residential status of participants, although a previous meta-analysis  
164 classified this status as community. The trial by Hansson et al was included, but a sensitivity analysis  
165 was performed that excluded that trial (**supplementary Figure 1**).

166 **Supplementary Figure 2** showed the assessment of the risk of bias. All studies were randomized;  
167 17 were double-blind, placebo-controlled trials; 13 trials described an adequate random sequence  
168 generation process; and 11 trials described the methods used for allocation concealment. No obvious  
169 publication bias was reported according to the **supplementary Figure 3, supplementary Figure 4** and  
170 **supplementary Figure 5**.

## 171 **Inconsistence and heterogeneity check**

172 The statistical inconsistency between direct and indirect comparisons was generally low according to  
173 inconsistency test because the CI values included zero (**supplementary Figure 6, supplementary**  
174 **Figure 7, supplementary Figure 8**). Therefore, we adopted a consistency model in all three groups.  
175 Meanwhile, the global heterogeneity parameter  $I^2$  values were 8.4%, 0% and 0% respectively, which  
176 indicated no obvious heterogeneity was observed in all these results (**supplementary Figure 9**,

1  
2  
3  
4 177 **supplementary Figure 10, supplementary Figure 11).**

5  
6  
7 178 **Primary outcome: total fracture**

8  
9 179 For estimating the vitamin D, calcium or their combination efficacy against total fractures, we  
10  
11 180 looked at data from 24965 individuals from 18 studies<sup>13 17 19 20 25 26 28 30 31 33-35 37 39 40 43-45</sup>. Pooled  
12  
13  
14 181 estimates included 15 studies with one treatment, 1 study with two treatments, and 2 studies with three  
15  
16  
17 182 treatments.

18  
19 183 The network plot of comparisons on total fractures was shown in **Figure 2A**. The forest plot for the  
20  
21  
22 184 network meta-analysis was shown in **Figure 3**. The RR values and 95% CIs are summarized in **Figure**  
23  
24  
25 185 **3**. The direct and indirect comparisons indicated no differences among the vitamin D, calcium or their  
26  
27  
28 186 combination that remained in the main network. Neither do the statistical differences between  
29  
30  
31 187 interventions and placebo ( $P<0.05$ ). So we didn't continue to make ranking graph of distribution of  
32  
33  
34 188 probabilities on total fractures.

35 189 **Secondary outcomes: hip fracture and vertebral fracture**

36  
37  
38 190 A total of 41845 individuals were included from 16 studies<sup>13 17 19 20 25-28 30 32 33 37 39 40 42 43</sup> for evaluate  
39  
40  
41 191 the drug efficacy against hip fractures. Pooled estimates included 13 studies with one treatment, 1 study  
42  
43  
44 192 with two treatments, and two studies with three treatments.

45  
46 193 The network plot of comparisons on hip fractures was shown in **Figure 2B**. The forest plot for the  
47  
48  
49 194 network meta-analysis was shown in **Figure 4**. The RR values and 95% CIs are summarized in **Figure**  
50  
51  
52 195 **4**. The direct and indirect comparisons indicated no differences among the vitamin D, calcium or their  
53  
54  
55 196 combination that remained in the main network. Neither do the statistical differences between drug  
56  
57  
58 197 experimental groups and placebo ( $P<0.05$ ). So we didn't continue to make ranking graph of  
59  
60 198 distribution of probabilities on total fractures.

1  
2  
3  
4 199 A total of 17612 individuals were collected from 12 studies<sup>13 17 19 20 25 28 29 36 38-41</sup> involving vertebral  
5  
6 200 fractures. Pooled estimates included 10 studies with one treatment, and two studies with three  
7  
8  
9 201 treatments.

10  
11 202 The network plot of comparisons on vertebral fractures was shown in **Figure 2C**. The forest plot for  
12  
13  
14 203 the network meta-analysis was shown in **Figure 5**. The RR values and 95% CIs are summarized in  
15  
16  
17 204 **Figure 5**. The direct and indirect comparisons indicated no differences among the vitamin D, calcium  
18  
19 205 or their combination that remained in the main network. Neither do the statistical differences between  
20  
21  
22 206 drug experimental groups and placebo ( $P < 0.05$ ). So we didn't continue to make ranking graph of  
23  
24  
25 207 distribution of probabilities on total fractures. In a separate sensitivity analysis, we excluded Hansson's  
26  
27 208 study<sup>29</sup> (**supplementary Figure 1**). However, there was still no significant association of vitamin D,  
28  
29  
30 209 calcium or their combination with total fracture.

## 31 32 210 **Discussion**

33  
34  
35 211 Vitamin D supplementation and calcium are suggested as interventions to treat and prevent fracture.  
36  
37  
38 212 We found the previous meta-analyses and RCTs are critically inconsistent in efficacy of different doses  
39  
40  
41 213 of vitamin D with calcium on fractures.

42  
43 214 Results of this meta-analysis showed that calcium, calcium plus vitamin D, and vitamin D  
44  
45  
46 215 supplementation alone were not significantly associated with a lower incidence of hip, vertebral, or  
47  
48  
49 216 total fractures in community-dwelling older adults. Sensitivity analyses that excluded low-quality trials  
50  
51  
52 217 and studies that exclusively enrolled patients with particular medical conditions did not alter these  
53  
54  
55 218 results.

56  
57 219 A meta-analysis conducted by Jia-Guo Zhao et al<sup>46</sup> showed that no significant difference was found  
58  
59 220 in the incidence of hip or other fractures, which was similar to our result. However, the object of  
60

1  
2  
3  
4 221 Zhao's study was to investigate whether calcium, vitamin D, or combined calcium and vitamin D  
5  
6 222 supplement are associated with a lower fracture incidence while our study was designed to evaluate the  
7  
8  
9 223 optimal concentration of them. Meanwhile, in Zhao's meta-analysis, the participants of the included  
10  
11 224 study reported by Massart<sup>47</sup> were adult maintenance hemodialysis patients, which may result in the  
12  
13  
14 225 imbalance of calcium in the body. Patients on hemodialysis may also be receiving  
15  
16  
17 226 1,25-dihydroxyvitamin D, which may affect their response to vitamin D supplementation. So we did  
18  
19  
20 227 not include that trial in our network meta-analysis. What's more, we didn't include studies that lasted  
21  
22 228 less than a year because we thought this time-frame was too short to see anti-fracture efficacy. And we  
23  
24  
25 229 suspected that a network meta-analysis might be a more suitable choice concerning all these different  
26  
27  
28 230 interventions mixed.

29  
30 231 Bischoff-Ferrari et al<sup>48</sup> reported that high-dose vitamin D supplementation (800 IU/d or higher)  
31  
32 232 played an important role in the reduction of the risk of falls and hip fractures, as well as prevented  
33  
34  
35 233 non-vertebral fractures in adults 65 years or older. However, their findings may have been influenced  
36  
37  
38 234 by the trial of Chapuy et al<sup>49</sup>, which only enrolled participants living in an institution. What's more,  
39  
40  
41 235 differences in conclusions of previous meta-analyses and the current meta-analysis were due to the  
42  
43 236 recently published trials which reported neutral or harmful associations of vitamin D supplementation  
44  
45  
46 237 and fracture incidence more and more. Study findings here indicated that vitamin D might result in a  
47  
48 238 higher risk for hip fracture, but this conclusion did not reach statistical significance. This finding may  
49  
50  
51 239 be attributable to lack of statistical power in this meta-analysis.

52  
53 240 Most recently there was a meta-analysis published in the Lancet by Bolland et al<sup>50</sup>, whose findings  
54  
55  
56 241 suggested that vitamin D supplementation does not prevent fractures or falls, or have clinically  
57  
58  
59 242 meaningful effects on bone mineral density. Although it was similar to our study to some extent, they  
60



1  
2  
3  
4  
5  
6  
7  
8  
9  
10  
11  
12  
13  
14  
15  
16  
17  
18  
19  
20  
21  
22  
23  
24  
25  
26  
27  
28  
29  
30  
31  
32  
33  
34  
35  
36  
37  
38  
39  
40  
41  
42  
43  
44  
45  
46  
47  
48  
49  
50  
51  
52  
53  
54  
55  
56  
57  
58  
59  
60

243 are really different. First, we only included community-dwelling older people. We found that some  
244 meta-analyses equated community-dwelling older people with those in nursing institution. The lack of  
245 exercise, dietary intake and exposure to sunlight made people in nursing institution turned more  
246 susceptible to the use of supplements including vitamin D, calcium or their combination. Although the  
247 studies involving participants living in nursing institution were only a small part, but it could change  
248 the whole outcomes and produce false positive results. We found only Avenell's study paid attention to  
249 this question when they conducted a subgroup analysis, but they did not discussed separately.  
250 Meanwhile, we only enrolled adults older than 50 years and trial duration more than 1 year to reduce  
251 the statistical heterogeneity in network meta-analysis. Furthermore, the current analyses included  
252 calcium supplementation, where the Bolland's study focused on vitamin D.

253 However, possible limitations of this study protocol include potential missing data and meta-biases,  
254 heterogeneity, which may limit the quality of evidence. Some RCTs were of poor quality and, for  
255 example, used unclear allocation concealment. So we made a sensitivity analysis by excluding  
256 low-quality trials. Although some study characteristics such as baseline serum 25-hydroxyvitamin D  
257 concentrations might be to contribute heterogeneity, we could not perform subgroup analysis or  
258 meta-regression analysis to evaluate it due to the extreme complexity and the limitation of Stata  
259 software for network meta-analysis. What's more, we combined bolus dosing by injection with oral  
260 supplements taken daily/monthly/yearly, which might have different effects on vitamin D status in the  
261 body. In addition, the report ignored the effect of treatment with vitamin D on plasma  
262 25-hydroxy-vitamin D concentrations and sub-types of fracture, such as pathologic fractures; this work  
263 does not necessarily preclude any benefit of vitamin D and calcium supplementation in older, frail  
264 individuals.

1  
2  
3  
4 265 **Conclusions**

5  
6 266 In this meta-analysis of randomized clinical trials, we found that the use of different concentrations of  
7  
8  
9 267 vitamin D, calcium or their combination in community-dwelling older adults was not associated with a  
10  
11  
12 268 lower risk of fractures. Our findings may not support the routine use of these supplements in  
13  
14  
15 269 community-dwelling older people.

16  
17 270 **Contributors**

18  
19 271 ZCH and AMW conceived the study. The search strategy was developed by LT and XBL. ZHF, GZ  
20  
21  
22 272 and QT will complete electronic search, select publications and assess their eligibility. ZHS and XBL  
23  
24  
25 273 will extract information of the included studies after screening. JWX will check the data entry for  
26  
27  
28 274 accuracy and completeness. ZCH and LT will give advice for data analysis and presentation of study  
29  
30  
31 275 result. LYS and CMS contributed to the text revision. WFN and AMW supervised the overall conduct  
32  
33 276 of the study. All the authors drafted and critically reviewed and approved the final manuscript.

34  
35 277 **Funds and Acknowledgement**

36  
37  
38 278 This work was funded by the National Natural Science Foundation of China (81501933, 81572214),  
39  
40  
41 279 Zhejiang Provincial Natural Science Foundation of China (LY14H060008), Zhejiang Provincial  
42  
43  
44 280 Medical Technology Foundation of China (2018254309, 2015111494), Wenzhou leading talent  
45  
46  
47 281 innovative project (RX2016004) and Wenzhou Municipal Science and Technology Bureau  
48  
49 282 (Y20170389). The funders had no role in the design, execution, or writing of the study.

50  
51 283 **Conflicts of interest**

52  
53 284 None declared

54  
55  
56 285 **Patient consent**

57  
58 286 Not required.  
59  
60

1  
2  
3  
4  
5  
6  
7  
8  
9  
10  
11  
12  
13  
14  
15  
16  
17  
18  
19  
20  
21  
22  
23  
24  
25  
26  
27  
28  
29  
30  
31  
32  
33  
34  
35  
36  
37  
38  
39  
40  
41  
42  
43  
44  
45  
46  
47  
48  
49  
50  
51  
52  
53  
54  
55  
56  
57  
58  
59  
60287 **Provenance and peer review**

288 Not commissioned; externally peer reviewed.

289 **Data sharing statement**

290 No additional data are available.

291 **References**

- 292 1. Svedbom A, Hernlund E, Ivergard M, et al. Osteoporosis in the European Union: a compendium of  
293 country-specific reports. *Arch Osteoporos* 2013;8:137. doi: 10.1007/s11657-013-0137-0
- 294 2. Mohd-Tahir NA, Li SC. Economic burden of osteoporosis-related hip fracture in Asia: a systematic  
295 review. *Osteoporos Int* 2017;28(7):2035-44. doi: 10.1007/s00198-017-3985-4
- 296 3. Kim J, Lee E, Kim S, et al. Economic Burden of Osteoporotic Fracture of the Elderly in South Korea: A  
297 National Survey. *Value Health Reg Issues* 2016;9:36-41. doi: 10.1016/j.vhri.2015.09.007
- 298 4. Qu B, Ma Y, Yan M, et al. The economic burden of fracture patients with osteoporosis in western  
299 China. *Osteoporos Int* 2014;25(7):1853-60. doi: 10.1007/s00198-014-2699-0
- 300 5. Wright NC, Looker AC, Saag KG, et al. The recent prevalence of osteoporosis and low bone mass in  
301 the United States based on bone mineral density at the femoral neck or lumbar spine. *J Bone*  
302 *Miner Res* 2014;29(11):2520-6. doi: 10.1002/jbmr.2269
- 303 6. Consensus conference: Osteoporosis. *JAMA* 1984;252(6):799-802.
- 304 7. Ross AC. The 2011 report on dietary reference intakes for calcium and vitamin D. *Public Health Nutr*  
305 2011;14(5):938-9. doi: 10.1017/S1368980011000565
- 306 8. Shea B, Wells G, Cranney A, et al. Meta-analyses of therapies for postmenopausal osteoporosis. VII.  
307 Meta-analysis of calcium supplementation for the prevention of postmenopausal  
308 osteoporosis. *Endocr Rev* 2002;23(4):552-9. doi: 10.1210/er.2001-7002
- 309 9. Reid IR, Bolland MJ, Grey A. Effects of vitamin D supplements on bone mineral density: a systematic  
310 review and meta-analysis. *Lancet* 2014;383(9912):146-55. doi:  
311 10.1016/s0140-6736(13)61647-5 [published Online First: 2013/10/15]
- 312 10. Weaver CM, Alexander DD, Boushey CJ, et al. Calcium plus vitamin D supplementation and risk of  
313 fractures: an updated meta-analysis from the National Osteoporosis Foundation. *Osteoporos*  
314 *Int* 2016;27(1):367-76. doi: 10.1007/s00198-015-3386-5
- 315 11. Group D. Patient level pooled analysis of 68 500 patients from seven major vitamin D fracture  
316 trials in US and Europe. *BMJ* 2010;340:b5463. doi: 10.1136/bmj.b5463
- 317 12. Flicker L, MacInnis RJ, Stein MS, et al. Should older people in residential care receive vitamin D to  
318 prevent falls? Results of a randomized trial. *J Am Geriatr Soc* 2005;53(11):1881-8. doi:  
319 10.1111/j.1532-5415.2005.00468.x [published Online First: 2005/11/09]
- 320 13. Trivedi DP, Doll R, Khaw KT. Effect of four monthly oral vitamin D3 (cholecalciferol)  
321 supplementation on fractures and mortality in men and women living in the community:  
322 randomised double blind controlled trial. *Bmj* 2003;326(7387):469. doi:  
323 10.1136/bmj.326.7387.469 [published Online First: 2003/03/01]
- 324 14. Lyons RA, Johansen A, Brophy S, et al. Preventing fractures among older people living in  
325 institutional care: a pragmatic randomised double blind placebo controlled trial of vitamin D

- 1  
2  
3 326 supplementation. *Osteoporos Int* 2007;18(6):811-8. doi: 10.1007/s00198-006-0309-5  
4 327 [published Online First: 2007/05/03]  
5  
6 328 15. Law M, Withers H, Morris J, et al. Vitamin D supplementation and the prevention of fractures and  
7 329 falls: results of a randomised trial in elderly people in residential accommodation. *Age*  
8 330 *Ageing* 2006;35(5):482-6. doi: 10.1093/ageing/afj080 [published Online First: 2006/04/28]  
9 331 16. Bischoff-Ferrari HA, Willett WC, Wong JB, et al. Prevention of nonvertebral fractures with oral  
10 332 vitamin D and dose dependency: a meta-analysis of randomized controlled trials. *Arch Intern*  
11 333 *Med* 2009;169(6):551-61. doi: 10.1001/archinternmed.2008.600 [published Online First:  
12 334 2009/03/25]  
13  
14 335 17. Sanders KM, Stuart AL, Williamson EJ, et al. Annual high-dose oral vitamin D and falls and fractures  
15 336 in older women: a randomized controlled trial. *Jama* 2010;303(18):1815-22. doi:  
16 337 10.1001/jama.2010.594 [published Online First: 2010/05/13]  
17  
18 338 18. Nakamura K, Saito T, Kobayashi R, et al. Effect of low-dose calcium supplements on bone loss in  
19 339 perimenopausal and postmenopausal Asian women: a randomized controlled trial. *J Bone*  
20 340 *Miner Res* 2012;27(11):2264-70. doi: 10.1002/jbmr.1676  
21  
22 341 19. Prince RL, Devine A, Dhaliwal SS, et al. Effects of calcium supplementation on clinical fracture and  
23 342 bone structure: results of a 5-year, double-blind, placebo-controlled trial in elderly women.  
24 343 *Arch Intern Med* 2006;166(8):869-75. doi: 10.1001/archinte.166.8.869 [published Online  
25 344 First: 2006/04/26]  
26  
27 345 20. Salovaara K, Tuppurainen M, Karkkainen M, et al. Effect of vitamin D(3) and calcium on fracture  
28 346 risk in 65- to 71-year-old women: a population-based 3-year randomized, controlled  
29 347 trial--the OSTPRE-FPS. *J Bone Miner Res* 2010;25(7):1487-95. doi: 10.1002/jbmr.48  
30 348 [published Online First: 2010/03/05]  
31  
32 349 21. Boonen S, Lips P, Bouillon R, et al. Need for additional calcium to reduce the risk of hip fracture  
33 350 with vitamin d supplementation: evidence from a comparative metaanalysis of randomized  
34 351 controlled trials. *J Clin Endocrinol Metab* 2007;92(4):1415-23. doi: 10.1210/jc.2006-1404  
35 352 [published Online First: 2007/02/01]  
36  
37 353 22. Moher D, Liberati A, Tetzlaff J, et al. Preferred reporting items for systematic reviews and  
38 354 meta-analyses: the PRISMA statement. *PLoS Med* 2009;6(7):e1000097. doi:  
39 355 10.1371/journal.pmed.1000097  
40  
41 356 23. Zintzaras E, Ioannidis JP. Heterogeneity testing in meta-analysis of genome searches. *Genet*  
42 357 *Epidemiol* 2005;28(2):123-37. doi: 10.1002/gepi.20048 [published Online First: 2004/12/14]  
43  
44 358 24. Chaimani A, Higgins JP, Mavridis D, et al. Graphical tools for network meta-analysis in STATA. *PLoS*  
45 359 *One* 2013;8(10):e76654. doi: 10.1371/journal.pone.0076654 [published Online First:  
46 360 2013/10/08]  
47  
48 361 25. Avenell A, Grant AM, McGee M, et al. The effects of an open design on trial participant  
49 362 recruitment, compliance and retention--a randomized controlled trial comparison with a  
50 363 blinded, placebo-controlled design. *Clin Trials* 2004;1(6):490-8. doi:  
51 364 10.1191/1740774504cn053oa [published Online First: 2005/11/11]  
52  
53 365 26. Baron JA, Beach M, Mandel JS, et al. Calcium supplements for the prevention of colorectal  
54 366 adenomas. Calcium Polyp Prevention Study Group. *N Engl J Med* 1999;340(2):101-7. doi:  
55 367 10.1056/nejm199901143400204 [published Online First: 1999/01/14]  
56  
57 368 27. Dawson-Hughes B, Harris SS, Krall EA, et al. Effect of calcium and vitamin D supplementation on  
58 369 bone density in men and women 65 years of age or older. *N Engl J Med* 1997;337(10):670-6.  
59  
60

1  
2  
3  
4  
5  
6  
7  
8  
9  
10  
11  
12  
13  
14  
15  
16  
17  
18  
19  
20  
21  
22  
23  
24  
25  
26  
27  
28  
29  
30  
31  
32  
33  
34  
35  
36  
37  
38  
39  
40  
41  
42  
43  
44  
45  
46  
47  
48  
49  
50  
51  
52  
53  
54  
55  
56  
57  
58  
59  
60

- doi: 10.1056/nejm199709043371003 [published Online First: 1997/09/04]
- 370  
371 28. Grant AM, Avenell A, Campbell MK, et al. Oral vitamin D3 and calcium for secondary prevention of  
372 low-trauma fractures in elderly people (Randomised Evaluation of Calcium Or vitamin D,  
373 RECORD): a randomised placebo-controlled trial. *Lancet* 2005;365(9471):1621-8. doi:  
374 10.1016/s0140-6736(05)63013-9 [published Online First: 2005/05/12]
- 375 29. Hansson T, Roos B. The effect of fluoride and calcium on spinal bone mineral content: a  
376 controlled, prospective (3 years) study. *Calcif Tissue Int* 1987;40(6):315-7. [published Online  
377 First: 1987/06/01]
- 378 30. Harwood RH, Sahota O, Gaynor K, et al. A randomised, controlled comparison of different calcium  
379 and vitamin D supplementation regimens in elderly women after hip fracture: The  
380 Nottingham Neck of Femur (NONOF) Study. *Age Ageing* 2004;33(1):45-51. [published Online  
381 First: 2003/12/30]
- 382 31. Hin H, Tomson J, Newman C, et al. Optimum dose of vitamin D for disease prevention in older  
383 people: BEST-D trial of vitamin D in primary care. *Osteoporos Int* 2017;28(3):841-51. doi:  
384 10.1007/s00198-016-3833-y [published Online First: 2016/12/18]
- 385 32. Jackson RD, LaCroix AZ, Gass M, et al. Calcium plus vitamin D supplementation and the risk of  
386 fractures. *N Engl J Med* 2006;354(7):669-83. doi: 10.1056/NEJMoa055218 [published Online  
387 First: 2006/02/17]
- 388 33. Lips P, Graafmans WC, Ooms ME, et al. Vitamin D supplementation and fracture incidence in  
389 elderly persons. A randomized, placebo-controlled clinical trial. *Ann Intern Med*  
390 1996;124(4):400-6. [published Online First: 1996/02/15]
- 391 34. Liu BX, Chen SP, Li YD, et al. The Effect of the Modified Eighth Section of Eight-Section Brocade on  
392 Osteoporosis in Postmenopausal Women: A Prospective Randomized Trial. *Medicine*  
393 (*Baltimore*) 2015;94(25):e991. doi: 10.1097/md.0000000000000991 [published Online First:  
394 2015/06/25]
- 395 35. Mitri J, Dawson-Hughes B, Hu FB, et al. Effects of vitamin D and calcium supplementation on  
396 pancreatic beta cell function, insulin sensitivity, and glycemia in adults at high risk of  
397 diabetes: the Calcium and Vitamin D for Diabetes Mellitus (CaDDM) randomized controlled  
398 trial. *Am J Clin Nutr* 2011;94(2):486-94. doi: 10.3945/ajcn.111.011684 [published Online First:  
399 2011/07/01]
- 400 36. Peacock M, Liu G, Carey M, et al. Effect of calcium or 25OH vitamin D3 dietary supplementation  
401 on bone loss at the hip in men and women over the age of 60. *J Clin Endocrinol Metab*  
402 2000;85(9):3011-9. doi: 10.1210/jcem.85.9.6836 [published Online First: 2000/09/22]
- 403 37. Porthouse J, Cockayne S, King C, et al. Randomised controlled trial of calcium and  
404 supplementation with cholecalciferol (vitamin D3) for prevention of fractures in primary  
405 care. *Bmj* 2005;330(7498):1003. doi: 10.1136/bmj.330.7498.1003 [published Online First:  
406 2005/04/30]
- 407 38. Recker RR, Hinders S, Davies KM, et al. Correcting calcium nutritional deficiency prevents spine  
408 fractures in elderly women. *J Bone Miner Res* 1996;11(12):1961-6. doi:  
409 10.1002/jbmr.5650111218 [published Online First: 1996/12/01]
- 410 39. Reid IR, Ames RW, Evans MC, et al. Effect of calcium supplementation on bone loss in  
411 postmenopausal women. *N Engl J Med* 1993;328(7):460-4. doi:  
412 10.1056/nejm199302183280702 [published Online First: 1993/02/18]
- 413 40. Reid IR, Mason B, Horne A, et al. Randomized controlled trial of calcium in healthy older women.

- 1  
2  
3 414 *Am J Med* 2006;119(9):777-85. doi: 10.1016/j.amjmed.2006.02.038 [published Online First:  
4 415 2006/09/02]
- 6 416 41. Riggs BL, O'Fallon WM, Muhs J, et al. Long-term effects of calcium supplementation on serum  
7 417 parathyroid hormone level, bone turnover, and bone loss in elderly women. *J Bone Miner Res*  
8 418 1998;13(2):168-74. doi: 10.1359/jbmr.1998.13.2.168 [published Online First: 1998/03/12]
- 10 419 42. Smith H, Anderson F, Raphael H, et al. Effect of annual intramuscular vitamin D on fracture risk in  
11 420 elderly men and women--a population-based, randomized, double-blind, placebo-controlled  
12 421 trial. *Rheumatology (Oxford)* 2007;46(12):1852-7. doi: 10.1093/rheumatology/kem240  
13 422 [published Online First: 2007/11/14]
- 15 423 43. Uusi-Rasi K, Patil R, Karinkanta S, et al. Exercise and vitamin D in fall prevention among older  
16 424 women: a randomized clinical trial. *JAMA Intern Med* 2015;175(5):703-11. doi:  
17 425 10.1001/jamainternmed.2015.0225 [published Online First: 2015/03/24]
- 19 426 44. Witham MD, Price RJ, Struthers AD, et al. Cholecalciferol treatment to reduce blood pressure in  
20 427 older patients with isolated systolic hypertension: the VitDISH randomized controlled trial.  
21 428 *JAMA Intern Med* 2013;173(18):1672-9. doi: 10.1001/jamainternmed.2013.9043 [published  
22 429 Online First: 2013/08/14]
- 24 430 45. Xue Y, Hu Y, Wang O, et al. Effects of Enhanced Exercise and Combined Vitamin D and Calcium  
25 431 Supplementation on Muscle Strength and Fracture Risk in Postmenopausal Chinese Women.  
26 432 *Zhongguo Yi Xue Ke Xue Yuan Xue Bao* 2017;39(3):345-51. doi:  
27 433 10.3881/j.issn.1000-503X.2017.03.008 [published Online First: 2017/07/12]
- 29 434 46. Zhao JG, Zeng XT, Wang J, et al. Association Between Calcium or Vitamin D Supplementation and  
30 435 Fracture Incidence in Community-Dwelling Older Adults: A Systematic Review and  
31 436 Meta-analysis. *Jama* 2017;318(24):2466-82. doi: 10.1001/jama.2017.19344 [published  
32 437 Online First: 2017/12/28]
- 34 438 47. Massart A, Debelle FD, Racape J, et al. Biochemical parameters after cholecalciferol repletion in  
35 439 hemodialysis: results From the VitaDial randomized trial. *Am J Kidney Dis*  
36 440 2014;64(5):696-705. doi: 10.1053/j.ajkd.2014.04.020 [published Online First: 2014/05/27]
- 38 441 48. Bischoff-Ferrari HA, Willett WC, Orav EJ, et al. A pooled analysis of vitamin D dose requirements  
39 442 for fracture prevention. *N Engl J Med* 2012;367(1):40-9. doi: 10.1056/NEJMoa1109617  
40 443 [published Online First: 2012/07/06]
- 42 444 49. Chapuy MC, Arlot ME, Duboeuf F, et al. Vitamin D3 and calcium to prevent hip fractures in elderly  
43 445 women. *N Engl J Med* 1992;327(23):1637-42. doi: 10.1056/nejm199212033272305  
44 446 [published Online First: 1992/12/03]
- 46 447 50. Bolland MJ, Grey A, Avenell A. Effects of vitamin D supplementation on musculoskeletal health: a  
47 448 systematic review, meta-analysis, and trial sequential analysis. *Lancet Diabetes Endocrinol*  
48 449 2018;6(11):847-58. doi: 10.1016/s2213-8587(18)30265-1 [published Online First:  
49 450 2018/10/09]

51  
52 451  
53  
54  
55  
5657 **Legends:**  
58  
59  
60

1  
2  
3  
4 453 **Figure 1.** The selection of literature for included studies.  
5  
6  
7  
8

9 454 **Figure 2.** The network plot of comparisons on total fractures (A), hip fractures (B) and vertebral  
10  
11 fractures (C). A: high calcium (800 mg/d or higher); B: low calcium (less than 800 mg/d); C: high  
12  
13 vitamin D (800 IU/d or higher); D: low vitamin D (less than 800 IU/d)  
14  
15  
16  
17  
18

19 457 **Figure 3.** The forest plot for the risk of total fractures. A: high calcium (800 mg/d or higher); B: low  
20  
21 calcium (less than 800 mg/d); C: high vitamin D (800 IU/d or higher); D: low vitamin D (less than  
22  
23 800 IU/d)  
24  
25  
26  
27  
28  
29

30 460 **Figure 4.** The forest plot for the risk of hip fractures. A: high calcium (800 mg/d or higher); B: low  
31  
32 calcium (less than 800 mg/d); C: high vitamin D (800 IU/d or higher); D: low vitamin D (less than  
33  
34 800 IU/d)  
35  
36  
37  
38  
39

40 463 **Figure 5.** The forest plot for the risk of vertebral fractures. A: high calcium (800 mg/d or higher); B:  
41  
42 low calcium (less than 800 mg/d); C: high vitamin D (800 IU/d or higher); D: low vitamin D (less  
43  
44 than 800 IU/d)  
45  
46  
47  
48  
49

50 466 **supplementary Figure 1.** A sensitivity analysis excluded the trial of Hansson et al. A: high calcium  
51  
52 (800 mg/d or higher); B: low calcium (less than 800 mg/d); C: high vitamin D (800 IU/d or higher);  
53  
54 D: low vitamin D (less than 800 IU/d)  
55  
56  
57  
58  
59  
60

1  
2  
3  
4 469 **supplementary Figure 2.** Risk of Bias Assessment of All Included Studies  
5  
6  
7

8  
9 470 **supplementary Figure 3.** Publication bias for the total fractures. A: high calcium (800 mg/d or higher);  
10  
11 471 B: low calcium (less than 800 mg/d); C: high vitamin D (800 IU/d or higher); D: low vitamin D (less  
12  
13 472 than 800 IU/d)  
14  
15  
16

17  
18  
19 473 **supplementary Figure 4.** Publication bias for the hip fractures. A: high calcium (800 mg/d or higher);  
20  
21 474 B: low calcium (less than 800 mg/d); C: high vitamin D (800 IU/d or higher); D: low vitamin D (less  
22  
23 475 than 800 IU/d)  
24  
25  
26

27  
28  
29 476 **supplementary Figure 5.** Publication bias for the vertebral fractures. A: high calcium (800 mg/d or  
30  
31 477 higher); B: low calcium (less than 800 mg/d); C: high vitamin D (800 IU/d or higher); D: low  
32  
33 478 vitamin D (less than 800 IU/d)  
34  
35  
36

37  
38  
39 479 **supplementary Figure 6.** Inconsistency test for the total fractures. A: high calcium (800 mg/d or  
40  
41 480 higher); B: low calcium (less than 800 mg/d); C: high vitamin D (800 IU/d or higher); D: low  
42  
43 481 vitamin D (less than 800 IU/d)  
44  
45  
46

47  
48  
49 482 **supplementary Figure 7.** Inconsistency test for the hip fractures. A: high calcium (800 mg/d or  
50  
51 483 higher); B: low calcium (less than 800 mg/d); C: high vitamin D (800 IU/d or higher); D: low  
52  
53 484 vitamin D (less than 800 IU/d)  
54  
55  
56  
57  
58  
59  
60



1  
2  
3  
4  
5  
6  
7  
8  
9  
10  
11  
12  
13  
14  
15  
16  
17  
18  
19  
20  
21  
22  
23  
24  
25  
26  
27  
28  
29  
30  
31  
32  
33  
34  
35  
36  
37  
38  
39  
40  
41  
42  
43  
44  
45  
46  
47  
48  
49  
50  
51  
52  
53  
54  
55  
56  
57  
58  
59  
60

485 **supplementary Figure 8.** Inconsistency test for the vertebral fractures. A: high calcium (800 mg/d or  
486 higher); B: low calcium (less than 800 mg/d); C: high vitamin D (800 IU/d or higher); D: low vitamin  
487 D (less than 800 IU/d)

488 **supplementary Figure 9.** Heterogeneity test for the total fractures.

489 **supplementary Figure 10.** Heterogeneity test for the hip fractures.

490 **supplementary Figure 11.** Heterogeneity test for the vertebral fractures.

For peer review only

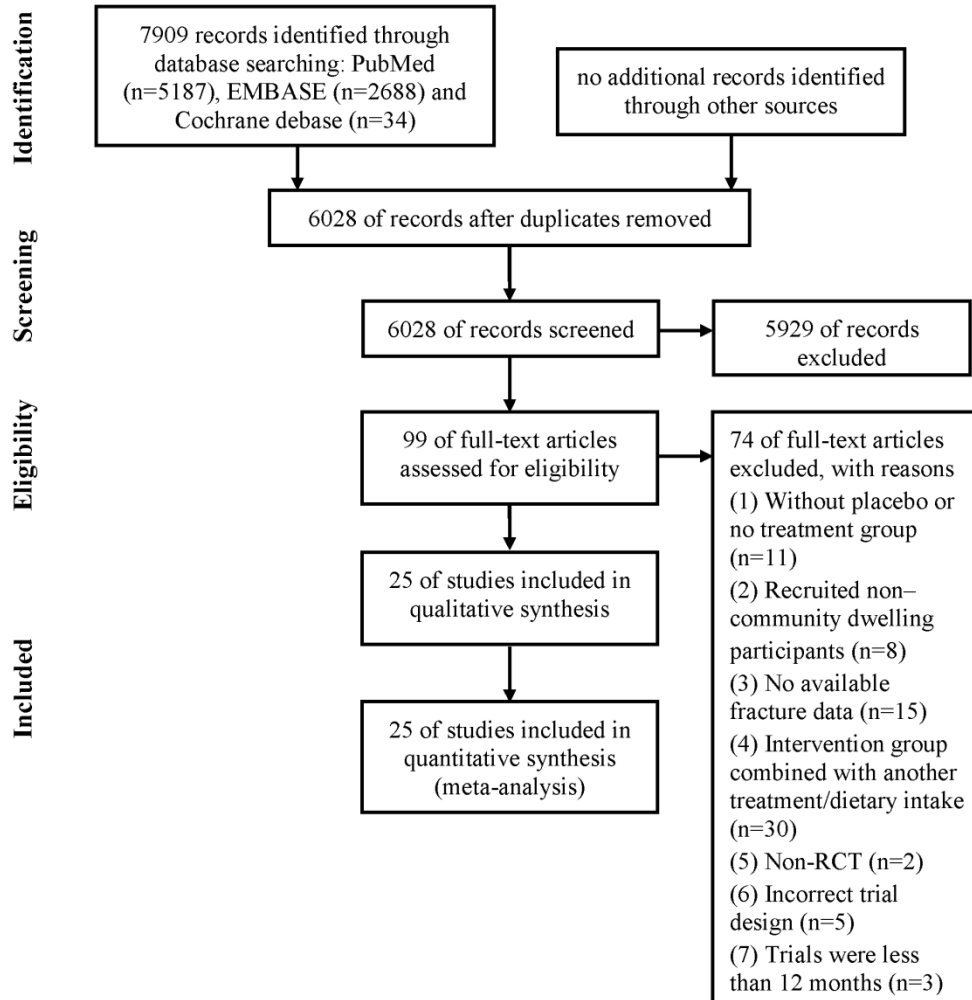

The selection of literature for included studies.

171x176mm (300 x 300 DPI)

1  
2  
3  
4  
5  
6  
7  
8  
9  
10  
11  
12  
13  
14  
15  
16  
17  
18  
19  
20  
21  
22  
23  
24  
25  
26  
27  
28  
29  
30  
31  
32  
33  
34  
35  
36  
37  
38  
39  
40  
41  
42  
43  
44  
45  
46  
47  
48  
49  
50  
51  
52  
53  
54  
55  
56  
57  
58  
59  
60

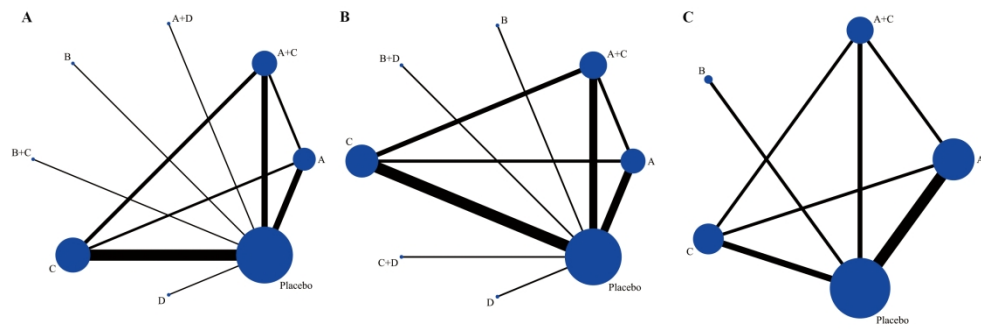

The network plot of comparisons on total fractures (A), hip fractures (B) and vertebral fractures (C). A: high calcium (800 mg/d or higher) ; B: low calcium (less than 800 mg/d) ; C: high vitamin D (800 IU/d or higher) ; D: low vitamin D (less than 800 IU/d)

272x96mm (300 x 300 DPI)

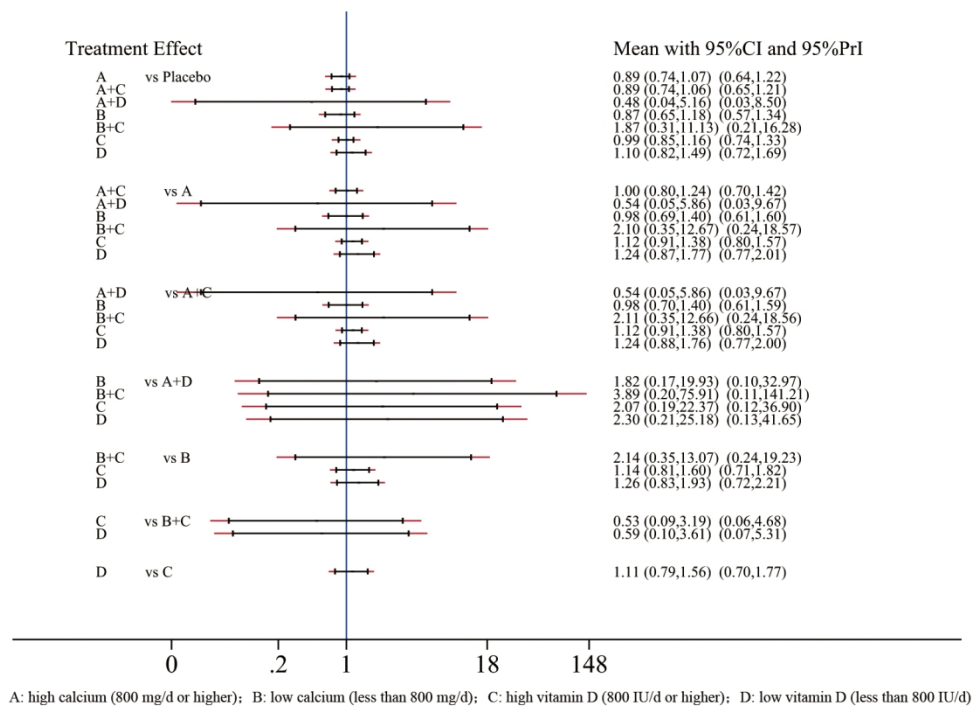

The forest plot for the risk of total fractures. A: high calcium (800 mg/d or higher) ; B: low calcium (less than 800 mg/d) ; C: high vitamin D (800 IU/d or higher) ; D: low vitamin D (less than 800 IU/d)

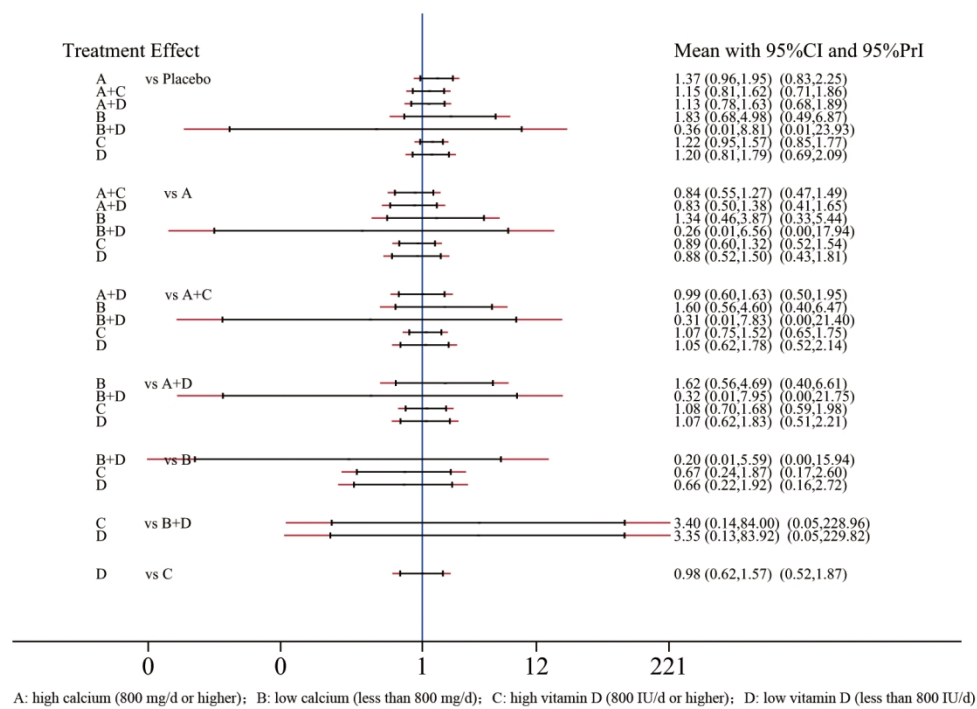

The forest plot for the risk of hip fractures. A: high calcium (800 mg/d or higher) ; B: low calcium (less than 800 mg/d) ; C: high vitamin D (800 IU/d or higher) ; D: low vitamin D (less than 800 IU/d)

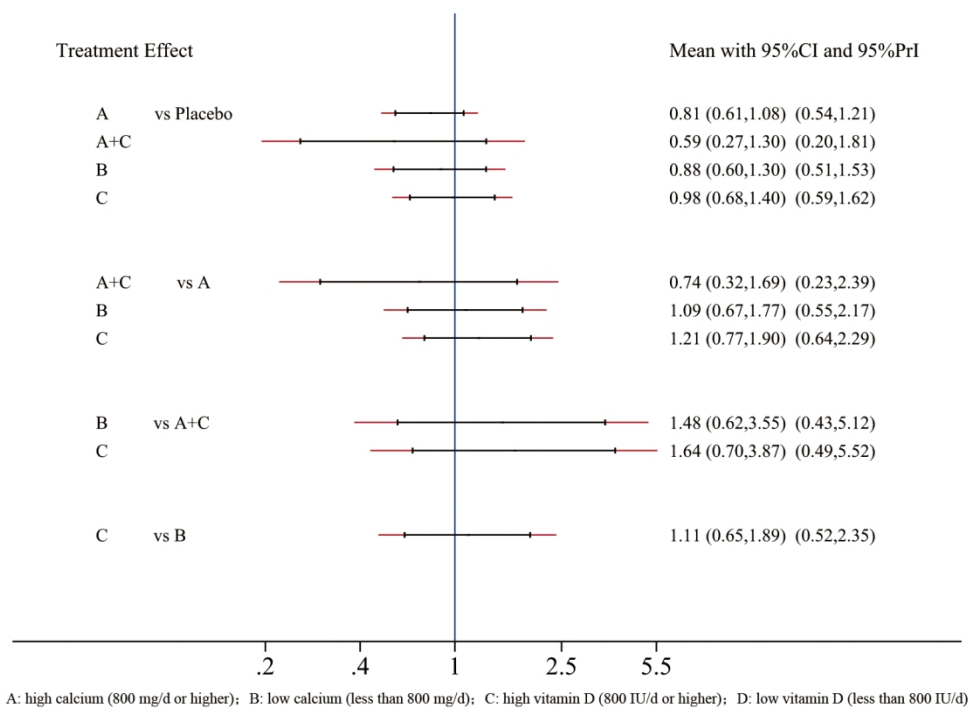

The forest plot for the risk of vertebral fractures. A: high calcium (800 mg/d or higher) ; B: low calcium (less than 800 mg/d) ; C: high vitamin D (800 IU/d or higher) ; D: low vitamin D (less than 800 IU/d)

**Supplementary eTable 1. Search Strategy for Each Database**

---

| <b>Database</b> | <b>Search strategy</b>                                                      |
|-----------------|-----------------------------------------------------------------------------|
| Pubmed          | #1 "calcium"[MeSH Terms] OR "calcium"[All Fields]                           |
|                 | #2 "vitamin d"[MeSH Terms] OR "vitamin d"[All Fields] OR                    |
|                 | "ergocalciferols"[MeSH Terms] OR "ergocalciferols"[All Fields]              |
|                 | #3 "fractures, bone"[MeSH Terms] OR ("fractures"[All Fields] AND "bone"[All |
|                 | Fields]) OR "bone fractures"[All Fields] OR "fracture"[All Fields]          |
|                 | #4 #1 or #2                                                                 |
|                 | #5 #3 and #4                                                                |

---

Supplementary Table 1 - Checklist of items to include when reporting a systematic review or meta-analysis

1  
2  
3  
4  
5  
6  
7  
8  
9  
10  
11  
12  
13  
14  
15  
16  
17  
18  
19  
20  
21  
22  
23  
24  
25  
26  
27  
28  
29  
30  
31  
32  
33  
34  
35  
36  
37  
38  
39  
40  
41  
42  
43  
44  
45  
46  
47

| Section/topic             | # | Checklist item                                                                                                                                                                                                                                                                                              | Reported on page # |
|---------------------------|---|-------------------------------------------------------------------------------------------------------------------------------------------------------------------------------------------------------------------------------------------------------------------------------------------------------------|--------------------|
| <b>TITLE</b>              |   |                                                                                                                                                                                                                                                                                                             |                    |
| Title                     | 1 | Identify the report as a systematic review, meta-analysis, or both.                                                                                                                                                                                                                                         | 1                  |
| <b>ABSTRACT</b>           |   |                                                                                                                                                                                                                                                                                                             |                    |
| Structured summary        | 2 | Provide a structured summary including, as applicable: background; objectives; data sources; study eligibility criteria, participants, and interventions; study appraisal and synthesis methods; results; limitations; conclusions and implications of key findings; systematic review registration number. | 2                  |
| <b>INTRODUCTION</b>       |   |                                                                                                                                                                                                                                                                                                             |                    |
| Rationale                 | 3 | Describe the rationale for the review in the context of what is already known.                                                                                                                                                                                                                              | 3                  |
| Objectives                | 4 | Provide an explicit statement of questions being addressed with reference to participants, interventions, comparisons, outcomes, and study design (PICOS).                                                                                                                                                  | 4                  |
| <b>METHODS</b>            |   |                                                                                                                                                                                                                                                                                                             |                    |
| Protocol and registration | 5 | Indicate if a review protocol exists, if and where it can be accessed (e.g., Web address), and, if available, provide registration information including registration number.                                                                                                                               | 5                  |
| Eligibility criteria      | 6 | Specify study characteristics (e.g., PICOS, length of follow-up) and report characteristics (e.g., years considered, language, publication status) used as criteria for eligibility, giving rationale.                                                                                                      | 5                  |
| Information sources       | 7 | Describe all information sources (e.g., databases with dates of coverage, contact with study authors to identify additional studies) in the search and date last searched.                                                                                                                                  | 5                  |
| Search                    | 8 | Present full electronic search strategy for at least one database, including any limits used, such that it could be repeated.                                                                                                                                                                               | 5                  |



1  
2  
3  
4  
5  
6  
7  
8  
9  
10  
11  
12  
13  
14  
15  
16  
17  
18  
19  
20  
21  
22  
23  
24  
25  
26  
27  
28  
29  
30  
31  
32  
33  
34  
35  
36  
37  
38  
39  
40  
41  
42  
43  
44  
45  
46  
47

| Section/topic                      | #  | Checklist item                                                                                                                                                                                                         | Reported on page # |
|------------------------------------|----|------------------------------------------------------------------------------------------------------------------------------------------------------------------------------------------------------------------------|--------------------|
| Study selection                    | 9  | State the process for selecting studies (i.e., screening, eligibility, included in systematic review, and, if applicable, included in the meta-analysis).                                                              | 6                  |
| Data collection process            | 10 | Describe method of data extraction from reports (e.g., piloted forms, independently, in duplicate) and any processes for obtaining and confirming data from investigators.                                             | 6                  |
| Data items                         | 11 | List and define all variables for which data were sought (e.g., PICOS, funding sources) and any assumptions and simplifications made.                                                                                  | 6                  |
| Risk of bias in individual studies | 12 | Describe methods used for assessing risk of bias of individual studies (including specification of whether this was done at the study or outcome level), and how this information is to be used in any data synthesis. | 6                  |
| Summary measures                   | 13 | State the principal summary measures (e.g., risk ratio, difference in means).                                                                                                                                          | 7                  |
| Synthesis of results               | 14 | Describe the methods of handling data and combining results of studies, if done, including measures of consistency (e.g., $I^2$ ) for each meta-analysis.                                                              | 7                  |
| Risk of bias across studies        | 15 | Specify any assessment of risk of bias that may affect the cumulative evidence (e.g., publication bias, selective reporting within studies).                                                                           | 7                  |
| Additional analyses                | 16 | Describe methods of additional analyses (e.g., sensitivity or subgroup analyses, meta-regression), if done, indicating which were pre-specified.                                                                       | 7                  |
| <b>RESULTS</b>                     |    |                                                                                                                                                                                                                        |                    |
| Study selection                    | 17 | Give numbers of studies screened, assessed for eligibility, and included in the review, with reasons for exclusions at each stage, ideally with a flow diagram.                                                        | 8                  |
| Study characteristics              | 18 | For each study, present characteristics for which data were extracted (e.g., study size, PICOS, follow-up period) and provide the citations.                                                                           | 8                  |
| Risk of bias within studies        | 19 | Present data on risk of bias of each study and, if available, any outcome-level assessment (see Item 12).                                                                                                              | 8                  |
| Results of individual studies      | 20 | For all outcomes considered (benefits or harms), present, for each study: (a) simple summary data for each intervention group and (b) effect estimates and confidence intervals, ideally with a forest plot.           | 9-10               |

1  
2  
3  
4  
5  
6  
7  
8  
9  
10  
11  
12  
13  
14  
15  
16  
17  
18  
19  
20  
21  
22  
23  
24  
25  
26  
27  
28  
29  
30  
31  
32  
33  
34  
35  
36  
37  
38  
39  
40  
41  
42  
43  
44  
45  
46  
47

| Section/topic               | #  | Checklist item                                                                                                                                                                        | Reported on page # |
|-----------------------------|----|---------------------------------------------------------------------------------------------------------------------------------------------------------------------------------------|--------------------|
| Synthesis of results        | 21 | Present results of each meta-analysis done, including confidence intervals and measures of consistency.                                                                               | 9-10               |
| Risk of bias across studies | 22 | Present results of any assessment of risk of bias across studies (see Item 15).                                                                                                       | 8                  |
| Additional analysis         | 23 | Give results of additional analyses, if done (e.g., sensitivity or subgroup analyses, meta-regression [see Item 16]).                                                                 | 8-10               |
| <b>DISCUSSION</b>           |    |                                                                                                                                                                                       |                    |
| Summary of evidence         | 24 | Summarize the main findings including the strength of evidence for each main outcome; consider their relevance to key groups (e.g., health care providers, users, and policy makers). | 10-12              |
| Limitations                 | 25 | Discuss limitations at study and outcome level (e.g., risk of bias), and at review level (e.g., incomplete retrieval of identified research, reporting bias).                         | 12                 |
| Conclusions                 | 26 | Provide a general interpretation of the results in the context of other evidence, and implications for future research.                                                               | 13                 |
| <b>FUNDING</b>              |    |                                                                                                                                                                                       |                    |
| Funding                     | 27 | Describe sources of funding for the systematic review and other support (e.g., supply of data); role of funders for the systematic review.                                            | 13                 |

| Source                                       | Intervention                                                                                                                                   | Women,<br>No. (%)    | Mean Age, y     | Previous<br>Fracture | Calcium Intake,<br>mg/d | Baseline 25OHD,<br>ng/mL | Treatment<br>Duration |
|----------------------------------------------|------------------------------------------------------------------------------------------------------------------------------------------------|----------------------|-----------------|----------------------|-------------------------|--------------------------|-----------------------|
| Avenell et al, 2004<br>(United Kingdom)      | Calcium(1 g/d) (n = 29)<br>No treatment (n = 35)                                                                                               | NA <sup>a</sup> (83) | 78 <sup>b</sup> | Yes                  | NA                      | NA                       | 3.8 y                 |
|                                              | D <sub>3</sub> ( 800IU/d) (n = 35)<br>No treatment (n = 35)                                                                                    | NA <sup>a</sup> (83) | 78 <sup>b</sup> | Yes                  | NA                      | NA                       | 3.8 y                 |
|                                              | Calcium (1g/d) + D <sub>3</sub><br>(800IU/d) (n = 35)<br>No treatment (n = 35)                                                                 | NA <sup>a</sup> (83) | 78 <sup>b</sup> | Yes                  | NA                      | NA                       | 3.8 y                 |
| Baron et al, 1999<br>(United States)         | Calcium: 1.2 g/d (n = 464)<br>Placebo (n = 466)                                                                                                | 258 (28)             | 61.0            | NA                   | 877                     | NA                       | 4 y                   |
| Dawson-Hughes et al,<br>1997 (United States) | Calcium (0.5g/d) + D <sub>3</sub><br>(700IU/d) (n = 187)<br>Placebo (n = 202)                                                                  | 213 (54)             | 71.1            | NA                   | 729                     | 29.6 <sup>e</sup>        | 3 y                   |
| Grant et al, 2005<br>(United Kingdom)        | Calcium(1 g/d) (n = 1311)<br>Placebo (n = 1332)                                                                                                | 2241 (85)            | 77              | Yes                  | NA                      | 15.2 <sup>e,f</sup>      | 2-5 y                 |
|                                              | D <sub>3</sub> ( 800IU/d) (n = 1343)<br>Placebo (n = 1332)                                                                                     | 2264 (85)            | 77              | Yes                  | NA                      | 15.2 <sup>e,f</sup>      | 2-5 y                 |
|                                              | Calcium (1g/d) + D <sub>3</sub><br>(800IU/d) (n = 1306)<br>Placebo (n = 1332)                                                                  | 2232 (85)            | 77.5            | Yes                  | NA                      | 15.2 <sup>e,f</sup>      | 2-5 y                 |
| Hansson and Roos,<br>1987 (Sweden)           | Calcium (1g/d) (n = 25)<br>Placebo (n = 25)                                                                                                    | 50 (100)             | 65.9            | Yes                  | NA                      | NA                       | 3 y                   |
| Harwood et al, 2004<br>(United Kingdom)      | D <sub>3</sub> (300000 IU once) (n = 38)<br>No treatment (n = 37)                                                                              | 75 (100)             | 80.5            | Yes                  | NA                      | 11.6                     | 1 y                   |
|                                              | Calcium (1g/d) + D <sub>2</sub><br>(300000 IU once) (n = 36)<br>Calcium (1g/d) + D <sub>3</sub><br>(800IU/d) (n = 39)<br>No treatment (n = 37) | 112 (100)            | 81.7            | Yes                  | NA                      | 11.9                     | 1 y                   |
| Hin et al, 2017<br>(United Kingdom)          | D <sub>3</sub> (4000 IU/d)(n = 102)<br>D <sub>3</sub> (2000 IU/d)(n = 102)<br>Placebo (n = 101)                                                | 150 (49)             | 71.7            | Partial <sup>c</sup> | 710                     | 20.1                     | 1 y                   |
| Jackson et al, 2006<br>(United States)       | Calcium (1g/d) + D <sub>3</sub> (400<br>IU/d) (n = 4015)                                                                                       | 7972 (100)           | 62.4            | Partial <sup>c</sup> | 1151                    | 18.9 <sup>e</sup>        | 7 y                   |

|    |                       |                                        |            |      |                      |      |                   |
|----|-----------------------|----------------------------------------|------------|------|----------------------|------|-------------------|
| 1  |                       |                                        |            |      |                      |      |                   |
| 2  |                       |                                        |            |      |                      |      |                   |
| 3  |                       | Placebo (n = 3957)                     |            |      |                      |      |                   |
| 4  |                       |                                        |            |      |                      |      |                   |
| 5  | Lips et al, 1996      | 400 IU/d (n = 1291)                    | 1916 (74)  | 80.0 | No hip fracture      | 868  | 10.6 <sup>e</sup> |
| 6  |                       |                                        |            |      |                      |      | 3-4 y             |
| 7  | The Netherlands)      | Placebo (n = 1287)                     |            |      |                      |      |                   |
| 8  |                       |                                        |            |      |                      |      |                   |
| 9  | Liu et al, 2015       | Calcium (1.5g/d) + D <sub>3</sub> (600 | 98 (100)   | 62.1 | No                   | 1500 | NA                |
| 10 | China)                | IU/d) (n = 50)                         |            |      |                      |      | 1 y               |
| 11 |                       | Placebo (n = 48)                       |            |      |                      |      |                   |
| 12 |                       |                                        |            |      |                      |      |                   |
| 13 | Mitri et al, 2011     | D <sub>3</sub> (2000 IU/d)(n = 23)     | 25 (53)    | 58.0 | NA                   | 926  | 25.3              |
| 14 |                       |                                        |            |      |                      |      | 4 mo              |
| 15 | United States)        | Placebo (n = 24)                       |            |      |                      |      |                   |
| 16 |                       |                                        |            |      |                      |      |                   |
| 17 | Peacock et al, 2000   | Calcium (0.75g/d) (n = 126)            | 187 (72)   | 73.8 | Partial <sup>c</sup> | 597  | 25.0              |
| 18 |                       |                                        |            |      |                      |      | 4 y               |
| 19 | United States)        | Placebo (n = 135)                      |            |      |                      |      |                   |
| 20 |                       |                                        |            |      |                      |      |                   |
| 21 | Porthouse et al, 2005 | Calcium (1g/d) + D <sub>3</sub> (800   | 3314 (100) | 76.8 | Partial <sup>c</sup> | 1080 | NA                |
| 22 |                       |                                        |            |      |                      |      | 1.5-3.5 y         |
| 23 | United Kingdom)       | IU/d) (n = 1321)                       |            |      |                      |      |                   |
| 24 |                       | No treatment (n = 1993)                |            |      |                      |      |                   |
| 25 |                       |                                        |            |      |                      |      |                   |
| 26 | Prince et al, 2006    | Calcium (0.48g/d) (n = 730)            | 1460 (100) | 75.2 | Partial <sup>c</sup> | 915  | 31.0 <sup>e</sup> |
| 27 |                       |                                        |            |      |                      |      | 5 y               |
| 28 | Australia)            | Placebo (n = 730)                      |            |      |                      |      |                   |
| 29 |                       |                                        |            |      |                      |      |                   |
| 30 | Recker et al, 1996    | Calcium (1.2 g/d) (n = 95)             | 197 (100)  | 73.5 | Partial <sup>c</sup> | 434  | 25.5 <sup>e</sup> |
| 31 |                       |                                        |            |      |                      |      | 4 y               |
| 32 | United States)        | Placebo (n = 102)                      |            |      |                      |      |                   |
| 33 |                       |                                        |            |      |                      |      |                   |
| 34 | Reid et al, 1993      | Calcium (1 g/d) (n = 68)               | 135 (100)  | 58   | No vertebral         | 750  | 37.5              |
| 35 |                       |                                        |            |      |                      |      | 4 y               |
| 36 | New Zealand)          | Placebo (n = 67)                       |            |      | fracture             |      |                   |
| 37 |                       |                                        |            |      |                      |      |                   |
| 38 | Reid et al, 2006      | Calcium (1 g/d) (n = 732)              | 1471 (100) | 74.3 | Partial <sup>c</sup> | 857  | 20.7              |
| 39 |                       |                                        |            |      |                      |      | 5 y               |
| 40 | New Zealand)          | Placebo (n = 739)                      |            |      |                      |      |                   |
| 41 |                       |                                        |            |      |                      |      |                   |
| 42 | Higgs et al, 1998     | Calcium (1.6 g/d) (n = 119)            | 236 (100)  | 66.2 | No                   | 714  | 30.1              |
| 43 |                       |                                        |            |      |                      |      | 4 y               |
| 44 | United States)        | Placebo (n = 117)                      |            |      |                      |      |                   |
| 45 |                       |                                        |            |      |                      |      |                   |
| 46 |                       |                                        |            |      |                      |      |                   |
| 47 |                       |                                        |            |      |                      |      |                   |
| 48 |                       |                                        |            |      |                      |      |                   |
| 49 |                       |                                        |            |      |                      |      |                   |
| 50 |                       |                                        |            |      |                      |      |                   |
| 51 |                       |                                        |            |      |                      |      |                   |
| 52 |                       |                                        |            |      |                      |      |                   |
| 53 |                       |                                        |            |      |                      |      |                   |
| 54 |                       |                                        |            |      |                      |      |                   |
| 55 |                       |                                        |            |      |                      |      |                   |
| 56 |                       |                                        |            |      |                      |      |                   |
| 57 |                       |                                        |            |      |                      |      |                   |
| 58 |                       |                                        |            |      |                      |      |                   |
| 59 |                       |                                        |            |      |                      |      |                   |
| 60 |                       |                                        |            |      |                      |      |                   |

1  
2  
3  
4  
5  
6  
7  
8  
9  
10  
11  
12  
13  
14  
15  
16  
17  
18  
19  
20  
21  
22  
23  
24  
25  
26  
27  
28  
29  
30  
31  
32  
33  
34  
35  
36  
37  
38  
39  
40  
41  
42  
43  
44  
45  
46  
47  
48  
49  
50  
51  
52  
53  
54  
55  
56  
57  
58  
59  
60

|                                        |                                                                             |           |      |                      |      |      |     |
|----------------------------------------|-----------------------------------------------------------------------------|-----------|------|----------------------|------|------|-----|
| (Finland)                              | Placebo (n = 102)                                                           |           |      |                      |      |      |     |
| Witham et al, 2013<br>(United Kingdom) | D <sub>3</sub> (100000 IU every 3 mo)<br>(n = 80)<br>Placebo (n = 79)       | 77 (49)   | 76.8 | NA                   | 1125 | 18.0 | 1 y |
| Xue et al, 2017<br>(China)             | Calcium (0.6g/d) + D <sub>3</sub> (800 IU/d) (n = 139)<br>Placebo (n = 173) | 312 (100) | 63.6 | Partial <sup>e</sup> | NA   | 30.8 | 1 y |

Abbreviation: 25OHD, 25-hydroxyvitamin D; NA, not available

<sup>a</sup> Women accounted for 83% of total participants in this trial, but detailed data not available for each group.

<sup>b</sup> Mean age is 78 y for total participants in this trial, but detailed data not available for each group.

<sup>c</sup> This trial reported partial participants with fracture history.

<sup>d</sup> Partial participants were assessed for dietary calcium intake.

<sup>e</sup> Partial participants received measurement of baseline 25OHD concentrations.

<sup>f</sup> The RECORD trial reported that the mean baseline 25OHD concentrations for a sample of 60 participants was 15.2 ng/mL, but detailed data were not available for each group.

**supplementary Table 2.** The characteristics of the included studies.

| Source                                              | Treatment |                                                              | No. of Participants |              |                    |
|-----------------------------------------------------|-----------|--------------------------------------------------------------|---------------------|--------------|--------------------|
|                                                     | Duration  | Intervention                                                 | Total Fracture      | Hip fracture | Vertebral Fracture |
| <b>Avenell et al, 2004</b><br>(United Kingdom)      | 3.8 y     | Calcium(1 g/d) (n = 29)                                      | 4                   | 1            | 0                  |
|                                                     |           | D <sub>3</sub> ( 800IU/d) (n = 35)                           | 3                   | 0            | 0                  |
|                                                     |           | Calcium (1g/d) + D <sub>3</sub><br>(800IU/d) (n = 35)        | 2                   | 1            | 0                  |
|                                                     |           | No treatment (n = 35)                                        | 4                   | 1            | 1                  |
| <b>Baron et al, 1999</b><br>(United States)         | 4 y       | Calcium: 1.2 g/d (n = 464)                                   | 4                   | 1            |                    |
|                                                     |           | Placebo (n = 466)                                            | 14                  | 0            |                    |
| <b>Dawson-Hughes et al, 1997</b><br>(United States) | 3 y       | Calcium (0.5g/d) + D <sub>3</sub><br>(700IU/d) (n = 187)     |                     | 0            |                    |
|                                                     |           | Placebo (n = 202)                                            |                     | 1            |                    |
| <b>Grant et al, 2005</b><br>(United Kingdom)        | 2-5 y     | Calcium(1 g/d) (n = 1311)                                    | 166                 | 49           | 3                  |
|                                                     |           | D <sub>3</sub> ( 800IU/d) (n = 1343)                         | 188                 | 47           | 4                  |
|                                                     |           | Calcium (1g/d) + D <sub>3</sub><br>(800IU/d) (n = 1306)      | 165                 | 46           | 0                  |
|                                                     |           | Placebo (n = 1332)                                           | 179                 | 41           | 1                  |
| <b>Hansson and Roos, 1987</b><br>(Sweden)           | 3 y       | Calcium (1g/d) (n = 25)                                      |                     |              | 1                  |
|                                                     |           | Placebo (n = 25)                                             |                     |              | 1                  |
| <b>Harwood et al, 2004</b><br>(United Kingdom)      | 1 y       | D <sub>3</sub> (300000 IU once) (n = 38)                     | 0                   | 0            |                    |
|                                                     |           | Calcium (1g/d) + D <sub>2</sub><br>(300000 IU once) (n = 36) | 6                   | 1            |                    |
|                                                     |           | Calcium (1g/d) + D <sub>3</sub><br>(800IU/d) (n = 39)        |                     |              |                    |
|                                                     |           | No treatment (n = 37)                                        | 5                   | 1            |                    |
| <b>Hin et al, 2017</b><br>(United Kingdom)          | 1 y       | D <sub>3</sub> (4000 IU/d)(n = 102)                          | 6                   |              |                    |
|                                                     |           | D <sub>3</sub> (2000 IU/d)(n = 102)                          |                     |              |                    |
|                                                     |           | Placebo (n = 101)                                            | 1                   |              |                    |
| <b>Jackson et al, 2006</b><br>(United States)       | 7 y       | Calcium (1g/d) + D <sub>3</sub> (400<br>IU/d) (n = 4015)     |                     | 70           |                    |
|                                                     |           | Placebo (n = 3957)                                           |                     | 61           |                    |

|                              |           |                                                       |     |    |    |
|------------------------------|-----------|-------------------------------------------------------|-----|----|----|
| <b>Lips et al, 1996</b>      | 3-4 y     | 400 IU/d (n = 1291)                                   | 135 | 58 |    |
| <b>(The Netherlands)</b>     |           | Placebo (n = 1287)                                    | 122 | 48 |    |
| <b>Liu et al, 2015</b>       | 1 y       | Calcium (1.5g/d) + D <sub>3</sub> (600 IU/d) (n = 50) | 1   |    |    |
| <b>(China)</b>               |           | Placebo (n = 48)                                      | 2   |    |    |
| <b>Mitri et al, 2011</b>     | 4 mo      | D <sub>3</sub> (2000 IU/d)(n = 23)                    | 1   |    |    |
| <b>(United States)</b>       |           | Placebo (n = 24)                                      | 0   |    |    |
| <b>Peacock et al, 2000</b>   | 4 y       | Calcium (0.75g/d) (n = 126)                           |     |    | 7  |
| <b>(United States)</b>       |           | Placebo (n = 135)                                     |     |    | 13 |
| <b>Porthouse et al, 2005</b> | 1.5-3.5 y | Calcium (1g/d) + D <sub>3</sub> (800 IU/d) (n = 1321) | 58  | 8  |    |
| <b>(United Kingdom)</b>      |           | No treatment (n = 1993)                               | 91  | 17 |    |
| <b>Prince et al, 2006</b>    | 5 y       | Calcium (0.48g/d) (n = 730)                           | 110 | 11 | 38 |
| <b>(Australia)</b>           |           | Placebo (n = 730)                                     | 126 | 6  | 39 |
| <b>Recker et al, 1996</b>    | 4 y       | Calcium (1.2 g/d) (n = 95)                            |     |    | 27 |
| <b>(United States)</b>       |           | Placebo (n = 102)                                     |     |    | 34 |
| <b>Reid et al, 1993</b>      | 4 y       | Calcium (1 g/d) (n = 68)                              | 2   | 0  | 0  |
| <b>(New Zealand)</b>         |           | Placebo (n = 67)                                      | 7   | 2  | 1  |
| <b>Reid et al, 2006</b>      | 5 y       | Calcium (1 g/d) (n = 732)                             | 134 | 17 | 27 |
| <b>(New Zealand)</b>         |           | Placebo (n = 739)                                     | 147 | 5  | 38 |
| <b>Riggs et al, 1998</b>     | 4 y       | Calcium (1.6 g/d) (n = 119)                           |     |    | 8  |
| <b>(United States)</b>       |           | Placebo (n = 117)                                     |     |    | 9  |
| <b>Salovaara et al, 2010</b> | 3 y       | Calcium(1g/d) + D <sub>3</sub> (800 IU/d) (n = 1718)  | 78  | 4  | 9  |
| <b>(Finland)</b>             |           | No treatment (n = 1714)                               | 94  | 2  | 13 |
| <b>Sanders et al, 2010</b>   | 3-5 y     | D <sub>3</sub> (500000 IU every year) (n = 1131)      | 155 | 19 | 35 |
| <b>(Australia)</b>           |           | Placebo (n = 1127)                                    | 125 | 15 | 28 |
| <b>Smith et al, 2007</b>     | 3 y       | D <sub>3</sub> (300000 IU every year) (n = 4727)      |     | 66 |    |
| <b>(United Kingdom)</b>      |           | Placebo (n = 4713)                                    |     | 44 |    |
| <b>Trivedi et al, 2003</b>   | 5 y       | D <sub>3</sub> (100000 IU every 4 mo) (n = 1345)      | 119 | 21 | 18 |
| <b>(United Kingdom)</b>      |           | Placebo (n = 1341)                                    | 149 | 24 | 28 |

|                              |     |                                        |   |   |
|------------------------------|-----|----------------------------------------|---|---|
| <b>Uusi-Rasi et al, 2015</b> | 2 y | D <sub>3</sub> (800 IU/d) (n = 102)    | 6 | 2 |
| <b>(Finland)</b>             |     | Placebo (n = 102)                      | 6 | 0 |
| <b>Witham et al, 2013</b>    | 1 y | D <sub>3</sub> (100000 IU every 3 mo)  | 2 |   |
| <b>(United Kingdom)</b>      |     | (n = 80)                               |   |   |
|                              |     | Placebo (n = 79)                       | 3 |   |
| <b>Xue et al, 2017</b>       | 1 y | Calcium (0.6g/d) + D <sub>3</sub> (800 | 3 |   |
| <b>(China)</b>               |     | IU/d) (n = 139)                        |   |   |
|                              |     | Placebo (n = 173)                      | 2 |   |

**Supplementary Table 3.** The detailed data of outcomes



1  
2  
3  
4  
5  
6  
7  
8  
9  
10  
11  
12  
13  
14  
15  
16  
17  
18  
19  
20  
21  
22  
23  
24  
25  
26  
27  
28  
29  
30  
31  
32  
33  
34  
35  
36  
37  
38  
39  
40  
41  
42  
43  
44  
45  
46  
47  
48  
49  
50  
51  
52  
53  
54  
55  
56  
57  
58  
59  
60

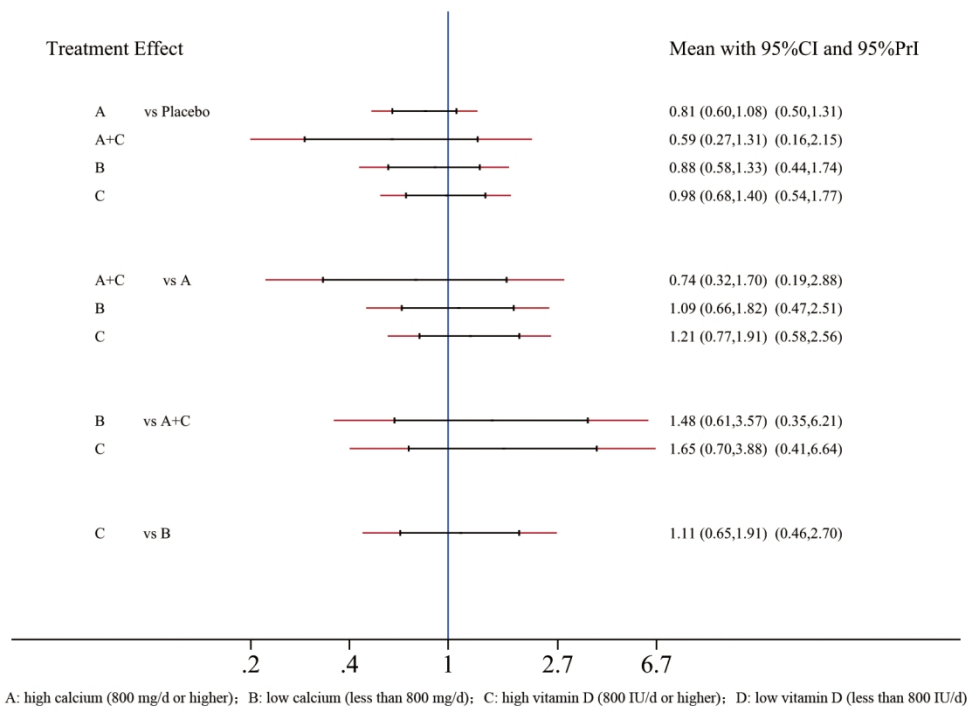

1  
2  
3  
4  
5  
6  
7  
8  
9  
10  
11  
12  
13  
14  
15  
16  
17  
18  
19  
20  
21  
22  
23  
24  
25  
26  
27  
28  
29  
30  
31  
32  
33  
34  
35  
36  
37  
38  
39  
40  
41  
42  
43  
44  
45  
46  
47  
48  
49  
50  
51  
52  
53  
54  
55  
56  
57  
58  
59  
60

|                           | Random sequence generation (selection bias) | Allocation concealment (selection bias) | Blinding of participants and personnel (performance bias) | Blinding of outcome assessment (detection bias) | Incomplete outcome data (attrition bias) | Selective reporting (reporting bias) | Other bias |
|---------------------------|---------------------------------------------|-----------------------------------------|-----------------------------------------------------------|-------------------------------------------------|------------------------------------------|--------------------------------------|------------|
| Avenell et al, 2004       | +                                           | +                                       | ?                                                         | +                                               | +                                        | ?                                    | ?          |
| Baron et al, 1999         | +                                           | ?                                       | +                                                         | +                                               | +                                        | ?                                    | +          |
| Dawson-Hughes et al, 1997 | ?                                           | ?                                       | +                                                         | +                                               | ?                                        | ?                                    | ?          |
| Grant et al, 2005         | +                                           | +                                       | ?                                                         | +                                               | ?                                        | +                                    | +          |
| Hansson and Roos, 1987    | ?                                           | ?                                       | ?                                                         | ?                                               | ?                                        | ?                                    | ?          |
| Harwood et al, 2004       | +                                           | +                                       | +                                                         | +                                               | +                                        | ?                                    | ?          |
| Hin et al, 2017           | +                                           | ?                                       | +                                                         | +                                               | +                                        | +                                    | +          |
| Jackson et al, 2006       | ?                                           | ?                                       | +                                                         | +                                               | +                                        | ?                                    | +          |
| Lips et al, 1996          | +                                           | +                                       | +                                                         | ?                                               | +                                        | ?                                    | +          |
| Liu et al, 2015           | ?                                           | ?                                       | +                                                         | ?                                               | +                                        | ?                                    | +          |
| Mitri et al, 2011         | +                                           | ?                                       | +                                                         | ?                                               | +                                        | ?                                    | +          |
| Peacock et al, 2000       | ?                                           | ?                                       | +                                                         | ?                                               | +                                        | ?                                    | ?          |
| Porthouse et al, 2005     | ?                                           | +                                       | +                                                         | +                                               | +                                        | ?                                    | +          |
| Prince et al, 2006        | +                                           | +                                       | +                                                         | ?                                               | +                                        | ?                                    | +          |
| Recker et al, 1996        | ?                                           | ?                                       | +                                                         | +                                               | +                                        | ?                                    | ?          |
| Reid et al, 1993          | ?                                           | ?                                       | +                                                         | ?                                               | ?                                        | ?                                    | +          |
| Reid et al, 2006          | ?                                           | +                                       | +                                                         | ?                                               | ?                                        | ?                                    | +          |
| Riggs et al, 1998         | ?                                           | ?                                       | +                                                         | ?                                               | +                                        | ?                                    | ?          |
| Salovaara et al, 2010     | +                                           | ?                                       | +                                                         | ?                                               | +                                        | ?                                    | ?          |
| Sanders et al, 2010       | +                                           | +                                       | +                                                         | +                                               | +                                        | ?                                    | +          |
| Smith et al, 2007         | ?                                           | +                                       | +                                                         | +                                               | +                                        | ?                                    | +          |
| Trivedi et al, 2003       | ?                                           | +                                       | +                                                         | +                                               | +                                        | ?                                    | +          |
| Uusi-Rasi et al, 2015     | +                                           | ?                                       | +                                                         | ?                                               | +                                        | +                                    | +          |
| Witham et al, 2013        | +                                           | +                                       | +                                                         | +                                               | ?                                        | +                                    | +          |
| Xue et al, 2017           | +                                           | ?                                       | ?                                                         | ?                                               | +                                        | ?                                    | ?          |

1  
2  
3  
4  
5  
6  
7  
8  
9  
10  
11  
12  
13  
14  
15  
16  
17  
18  
19  
20  
21  
22  
23  
24  
25  
26  
27  
28  
29  
30  
31  
32  
33  
34  
35  
36  
37  
38  
39  
40  
41  
42  
43  
44  
45  
46  
47  
48  
49  
50  
51  
52  
53  
54  
55  
56  
57  
58  
59  
60

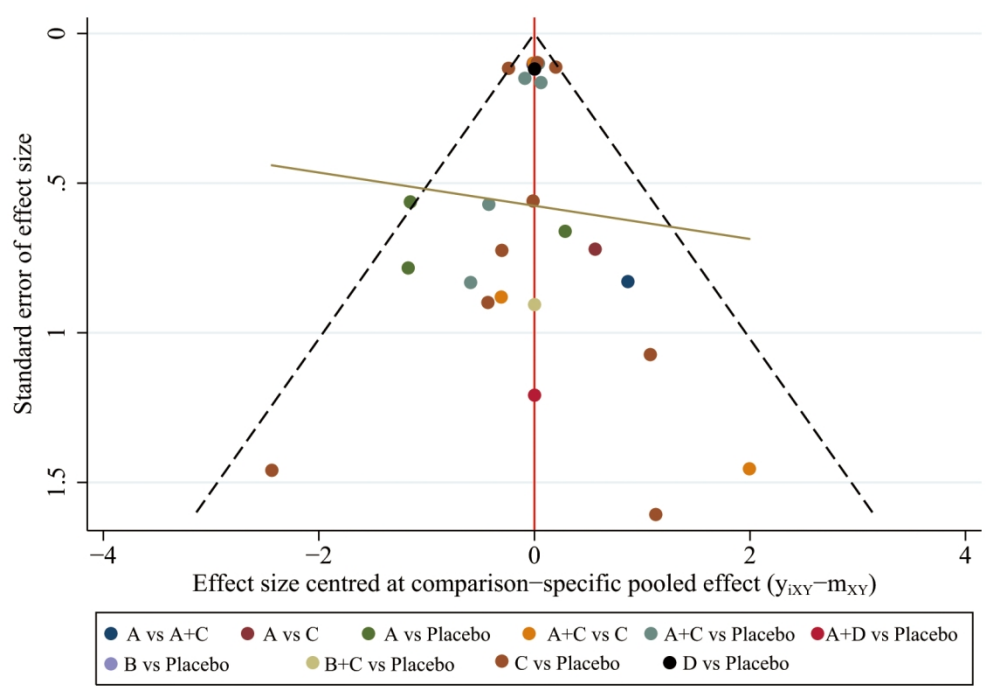

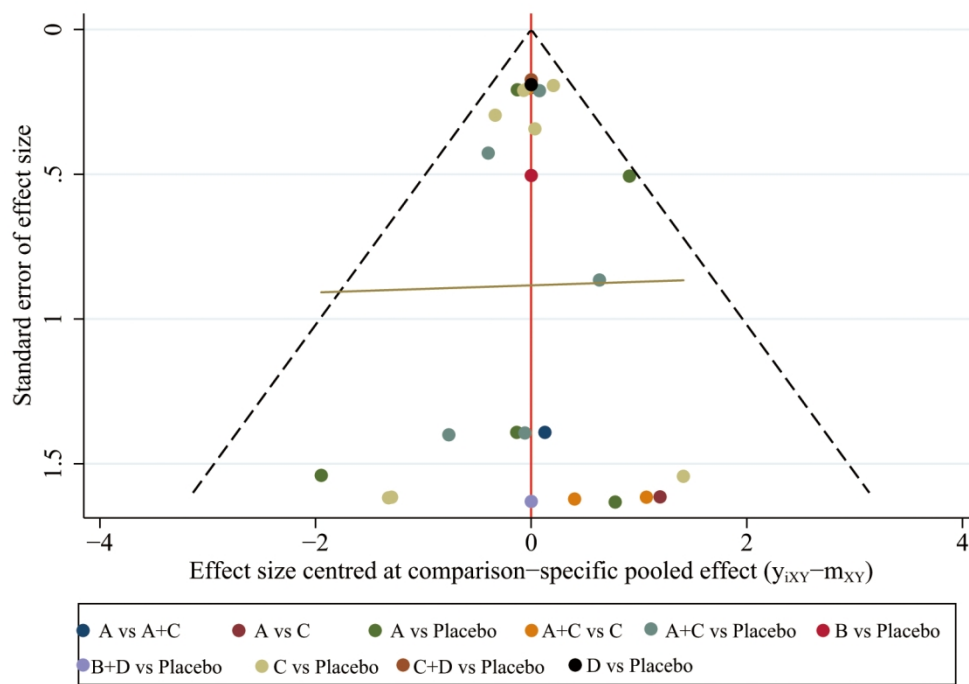

1  
2  
3  
4  
5  
6  
7  
8  
9  
10  
11  
12  
13  
14  
15  
16  
17  
18  
19  
20  
21  
22  
23  
24  
25  
26  
27  
28  
29  
30  
31  
32  
33  
34  
35  
36  
37  
38  
39  
40  
41  
42  
43  
44  
45  
46  
47  
48  
49  
50  
51  
52  
53  
54  
55  
56  
57  
58  
59  
60

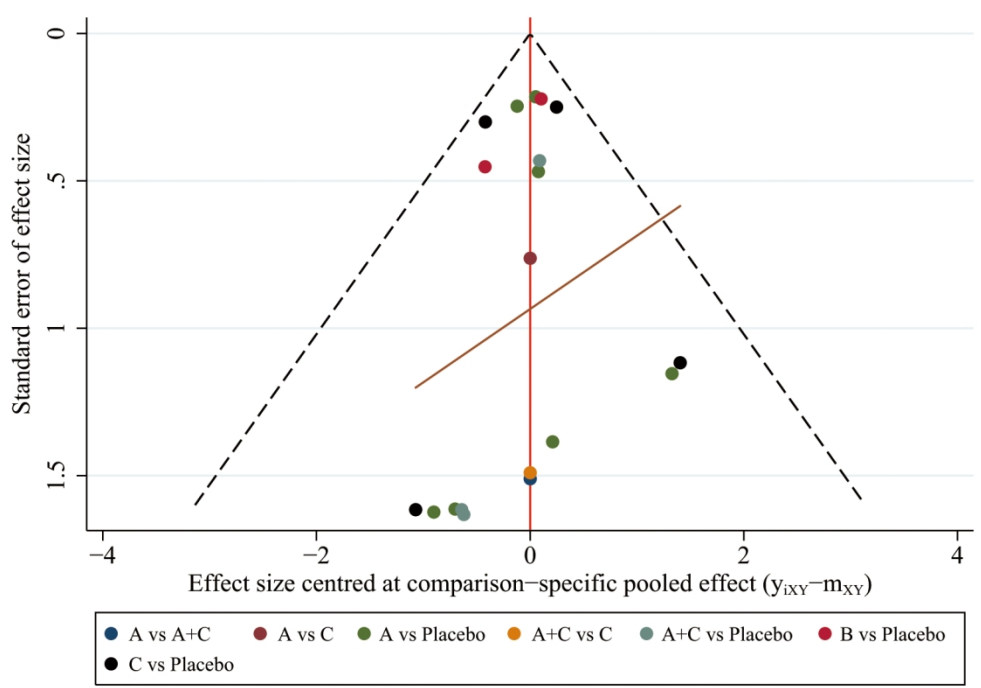

1  
2  
3  
4  
5  
6  
7  
8  
9  
10  
11  
12  
13  
14  
15  
16  
17  
18  
19  
20  
21  
22  
23  
24  
25  
26  
27  
28  
29  
30  
31  
32  
33  
34  
35  
36  
37  
38  
39  
40  
41  
42  
43  
44  
45  
46  
47  
48  
49  
50  
51  
52  
53  
54  
55  
56  
57  
58  
59  
60

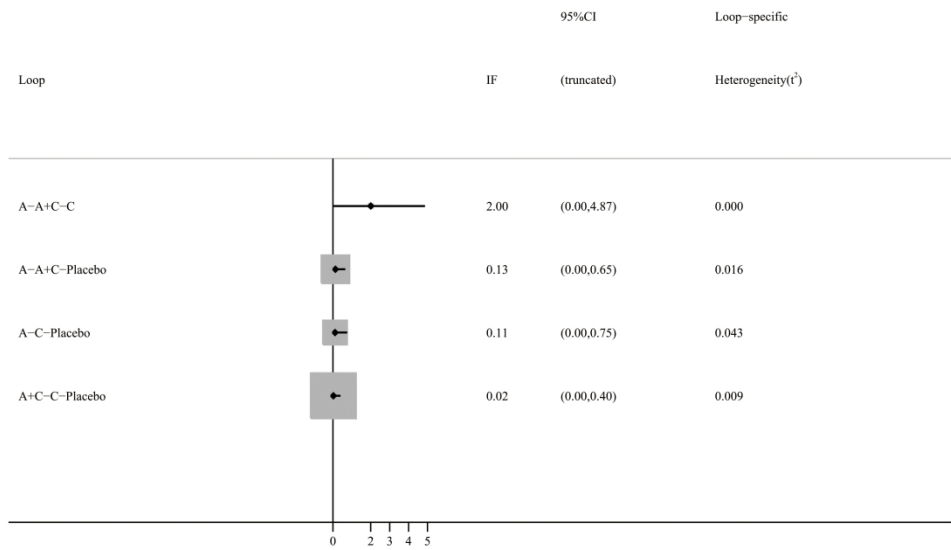

1  
2  
3  
4  
5  
6  
7  
8  
9  
10  
11  
12  
13  
14  
15  
16  
17  
18  
19  
20  
21  
22  
23  
24  
25  
26  
27  
28  
29  
30  
31  
32  
33  
34  
35  
36  
37  
38  
39  
40  
41  
42  
43  
44  
45  
46  
47  
48  
49  
50  
51  
52  
53  
54  
55  
56  
57  
58  
59  
60

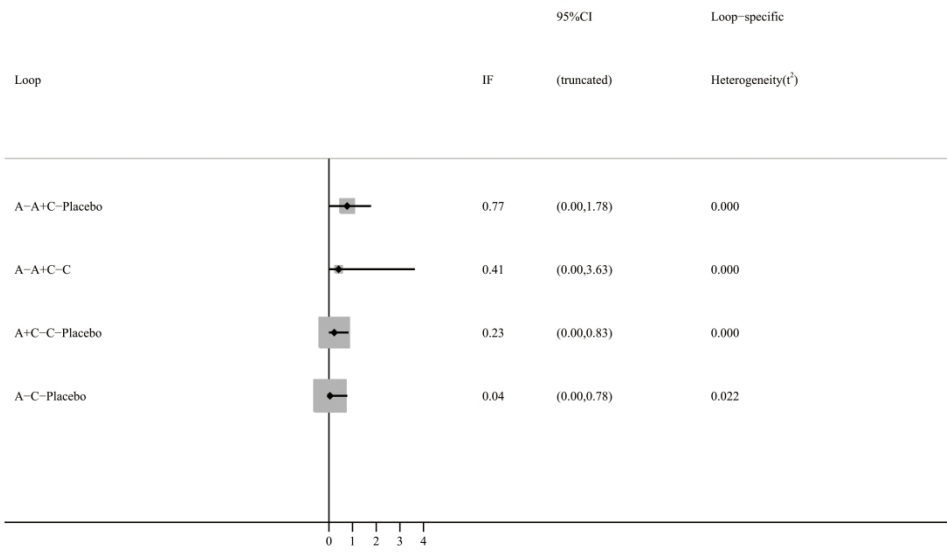

1  
2  
3  
4  
5  
6  
7  
8  
9  
10  
11  
12  
13  
14  
15  
16  
17  
18  
19  
20  
21  
22  
23  
24  
25  
26  
27  
28  
29  
30  
31  
32  
33  
34  
35  
36  
37  
38  
39  
40  
41  
42  
43  
44  
45  
46  
47  
48  
49  
50  
51  
52  
53  
54  
55  
56  
57  
58  
59  
60

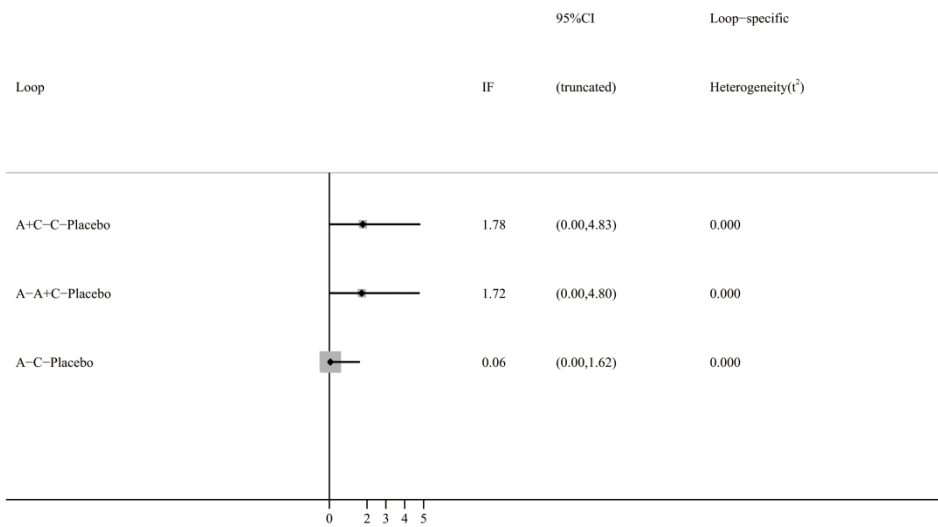

\*\*\* Loop(s) [A-A+C-C] are formed only by multi-arm trial(s) – Consistent by definition



1  
2  
3  
4  
5  
6  
7  
8  
9  
10  
11  
12  
13  
14  
15  
16  
17  
18  
19  
20  
21  
22  
23  
24  
25  
26  
27  
28  
29  
30  
31  
32  
33  
34  
35  
36  
37  
38  
39  
40  
41  
42  
43  
44  
45  
46  
47  
48  
49  
50  
51  
52  
53  
54  
55  
56  
57  
58  
59  
60

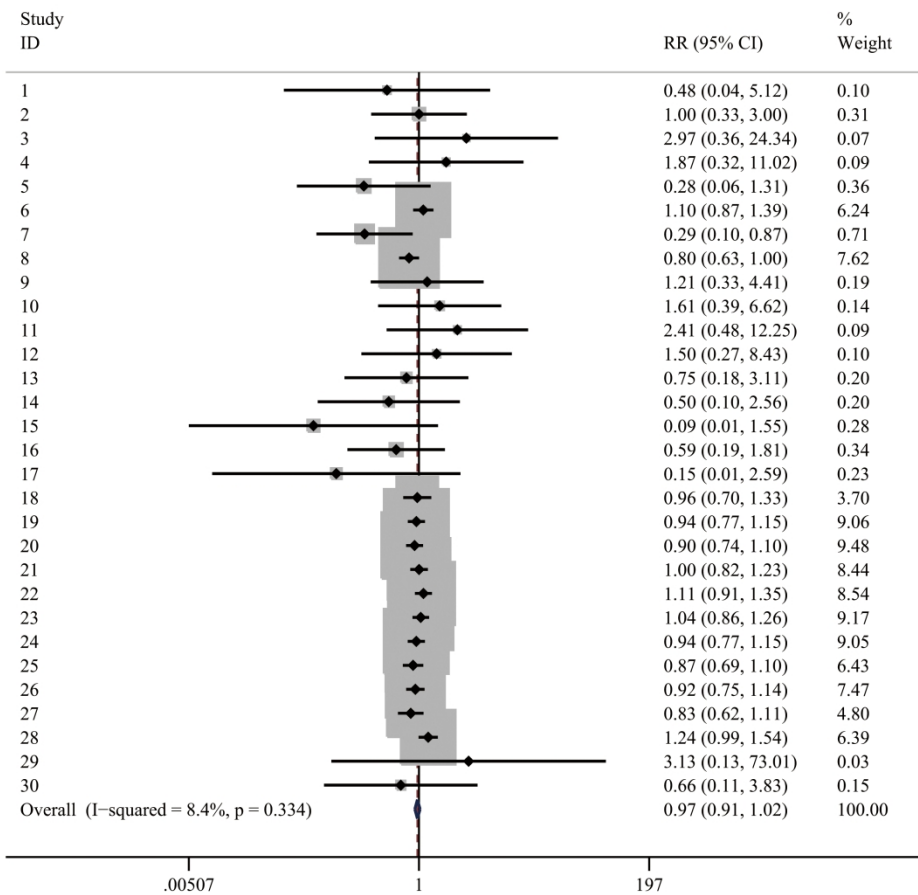

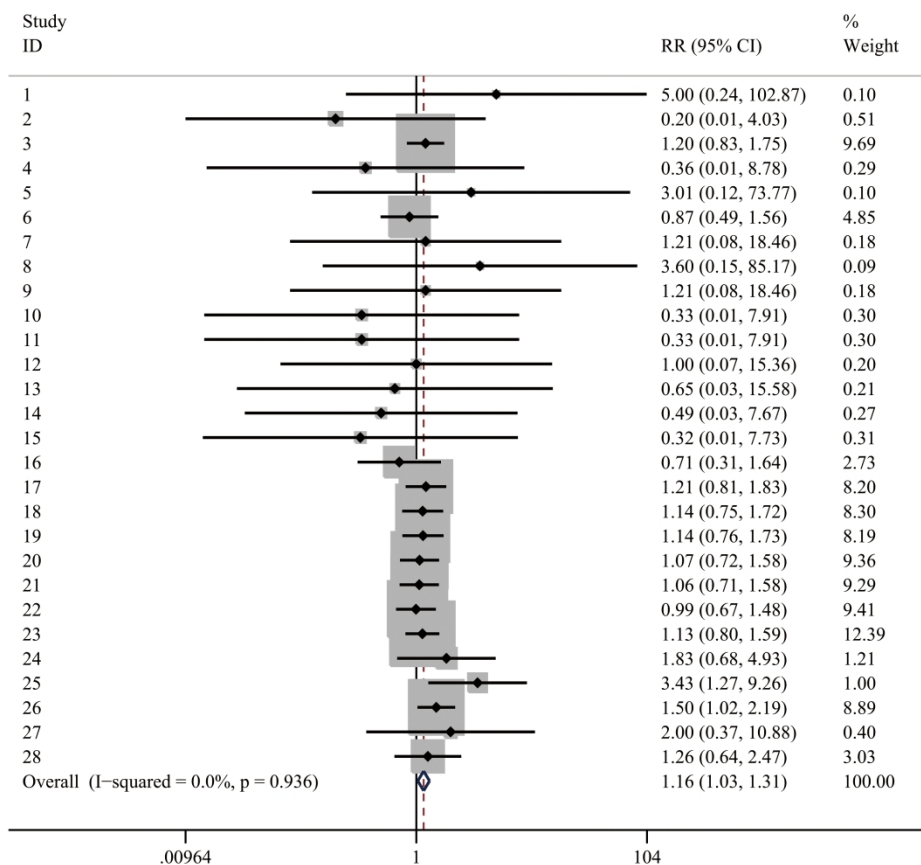

1  
2  
3  
4  
5  
6  
7  
8  
9  
10  
11  
12  
13  
14  
15  
16  
17  
18  
19  
20  
21  
22  
23  
24  
25  
26  
27  
28  
29  
30  
31  
32  
33  
34  
35  
36  
37  
38  
39  
40  
41  
42  
43  
44  
45  
46  
47  
48  
49  
50  
51  
52  
53  
54  
55  
56  
57  
58  
59  
60

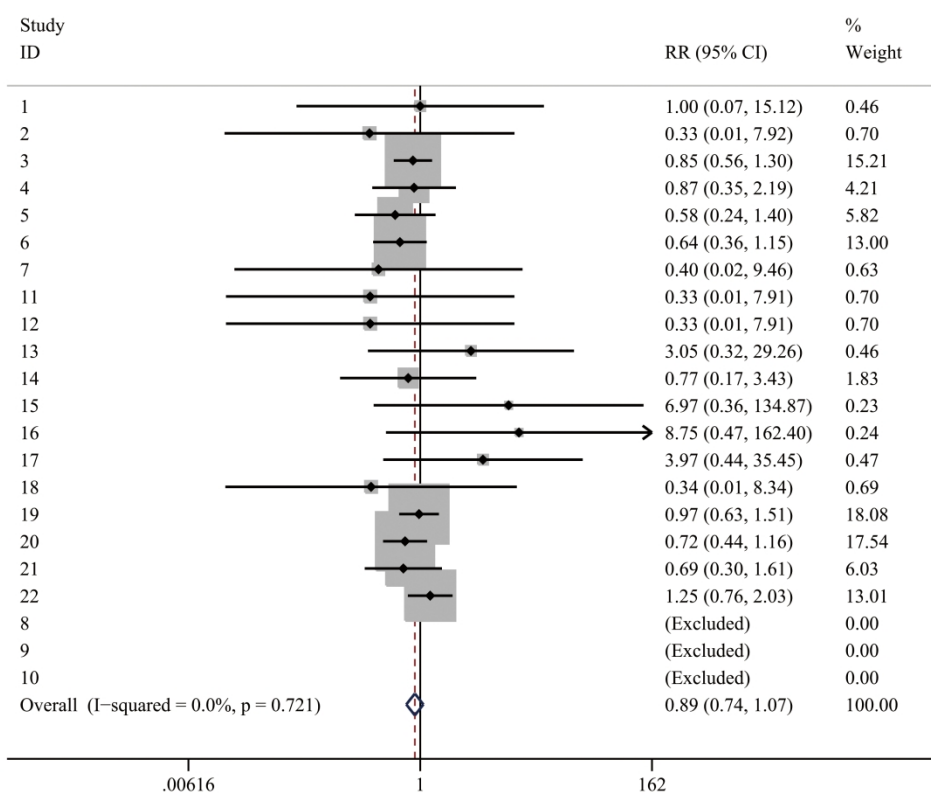

# BMJ Open

## Comparison of fracture risk using different supplemental doses of vitamin D, calcium or their combination: a network meta-analysis of randomized controlled trials

|                               |                                                                                                                                                                                                                                                                                                                                                                                                                                                                                                                                                                                                                                                                                                                                                                                                                                                                                                                                                                                                                                                                                                                                                                                                                                                                                                                                                                                                                                                                                                                                                                                                                                                                                                                                                                                                                                                                                                                                                                                                                                                                                                                                                                                                                                                                                                                        |
|-------------------------------|------------------------------------------------------------------------------------------------------------------------------------------------------------------------------------------------------------------------------------------------------------------------------------------------------------------------------------------------------------------------------------------------------------------------------------------------------------------------------------------------------------------------------------------------------------------------------------------------------------------------------------------------------------------------------------------------------------------------------------------------------------------------------------------------------------------------------------------------------------------------------------------------------------------------------------------------------------------------------------------------------------------------------------------------------------------------------------------------------------------------------------------------------------------------------------------------------------------------------------------------------------------------------------------------------------------------------------------------------------------------------------------------------------------------------------------------------------------------------------------------------------------------------------------------------------------------------------------------------------------------------------------------------------------------------------------------------------------------------------------------------------------------------------------------------------------------------------------------------------------------------------------------------------------------------------------------------------------------------------------------------------------------------------------------------------------------------------------------------------------------------------------------------------------------------------------------------------------------------------------------------------------------------------------------------------------------|
| Journal:                      | <i>BMJ Open</i>                                                                                                                                                                                                                                                                                                                                                                                                                                                                                                                                                                                                                                                                                                                                                                                                                                                                                                                                                                                                                                                                                                                                                                                                                                                                                                                                                                                                                                                                                                                                                                                                                                                                                                                                                                                                                                                                                                                                                                                                                                                                                                                                                                                                                                                                                                        |
| Manuscript ID                 | bmjopen-2018-024595.R2                                                                                                                                                                                                                                                                                                                                                                                                                                                                                                                                                                                                                                                                                                                                                                                                                                                                                                                                                                                                                                                                                                                                                                                                                                                                                                                                                                                                                                                                                                                                                                                                                                                                                                                                                                                                                                                                                                                                                                                                                                                                                                                                                                                                                                                                                                 |
| Article Type:                 | Original research                                                                                                                                                                                                                                                                                                                                                                                                                                                                                                                                                                                                                                                                                                                                                                                                                                                                                                                                                                                                                                                                                                                                                                                                                                                                                                                                                                                                                                                                                                                                                                                                                                                                                                                                                                                                                                                                                                                                                                                                                                                                                                                                                                                                                                                                                                      |
| Date Submitted by the Author: | 02-Aug-2019                                                                                                                                                                                                                                                                                                                                                                                                                                                                                                                                                                                                                                                                                                                                                                                                                                                                                                                                                                                                                                                                                                                                                                                                                                                                                                                                                                                                                                                                                                                                                                                                                                                                                                                                                                                                                                                                                                                                                                                                                                                                                                                                                                                                                                                                                                            |
| Complete List of Authors:     | <p>Hu, Zhi-Chao; The Second Affiliated Hospital and Yuying Children's Hospital of Wenzhou Medical University, Second Medical School of Wenzhou Medical University, Wenzhou, Zhejiang, China, Department of Orthopedics</p> <p>Tang, Qian; The Second Affiliated Hospital and Yuying Children's Hospital of Wenzhou Medical University, Second Medical School of Wenzhou Medical University, Wenzhou, Zhejiang, China, Department of Orthopedics</p> <p>Sang , Chang-Min ; Department of Orthopaedics, The Affiliated Hospital of Jiujiang Medical College, Jiujiang, Jiangxi, 332000, China., Department of Orthopaedics</p> <p>Tang, Li; The Second Affiliated Hospital and Yuying Children's Hospital of Wenzhou Medical University, Second Medical School of Wenzhou Medical University, Wenzhou, Zhejiang, China, Department of Orthopedics</p> <p>Li, Xiaobin; The Second Affiliated Hospital and Yuying Children's Hospital of Wenzhou Medical University</p> <p>Zheng, Gang; The Second Affiliated Hospital and Yuying Children's Hospital of Wenzhou Medical University, Second Medical School of Wenzhou Medical University, Wenzhou, Zhejiang, China, Department of Orthopedics</p> <p>Feng, Zhen-Hua; The Second Affiliated Hospital and Yuying Children's Hospital of Wenzhou Medical University, Second Medical School of Wenzhou Medical University, Wenzhou, Zhejiang, China, Department of Orthopedics</p> <p>Xuan, Jiang-Wei; The Second Affiliated Hospital and Yuying Children's Hospital of Wenzhou Medical University, Second Medical School of Wenzhou Medical University, Wenzhou, Zhejiang, China, Department of Orthopedics</p> <p>Shen, Zhi-Hao; Department of Orthopaedics, The Second Affiliated Hospital and Yuying Children's Hospital of Wenzhou Medical University, Wenzhou, Zhejiang, 325027, China.; Hainan Medical College, Haikou, Hainan, China.</p> <p>Shen, Li-Yan; The Second Affiliated Hospital and Yuying Children's Hospital of Wenzhou Medical University, Second Medical School of Wenzhou Medical University, Wenzhou, Zhejiang, China, Department of Orthopedics</p> <p>ni, wenfei; The Second Affiliated Hospital and Yuying Children's Hospital of Wenzhou Medical University, Second Medical College of Wenzhou Medical University, Department of Orthopaedics;</p> |

1  
2  
3  
4  
5  
6  
7  
8  
9  
10  
11  
12  
13  
14  
15  
16  
17  
18  
19  
20  
21  
22  
23  
24  
25  
26  
27  
28  
29  
30  
31  
32  
33  
34  
35  
36  
37  
38  
39  
40  
41  
42  
43  
44  
45  
46  
47  
48  
49  
50  
51  
52  
53  
54  
55  
56  
57  
58  
59  
60

|                                  |                                                                                                                                                                                                                   |
|----------------------------------|-------------------------------------------------------------------------------------------------------------------------------------------------------------------------------------------------------------------|
|                                  | Wu, Ai-Min; The Second Affiliated Hospital and Yuying Children’s Hospital of Wenzhou Medical University, Second Medical School of Wenzhou Medical University, Wenzhou, Zhejiang, China, Department of Orthopedics |
| <b>Primary Subject Heading</b> : | Nutrition and metabolism                                                                                                                                                                                          |
| Secondary Subject Heading:       | Diabetes and endocrinology, Nutrition and metabolism                                                                                                                                                              |
| Keywords:                        | Calcium, Vitamin D, Fractures, network meta-analysis                                                                                                                                                              |
|                                  |                                                                                                                                                                                                                   |

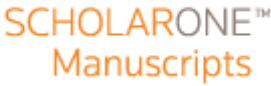

1  
2  
3  
4 1 **Comparison of fracture risk using different supplemental doses of vitamin D, calcium or their**  
5  
6  
7 2 **combination: a network meta-analysis of randomized controlled trials**

8  
9 3 Zhi-Chao Hu<sup>1,2,3</sup>, Qian Tang<sup>1,2,3</sup>, Chang-Min Sang<sup>4</sup>, Li Tang<sup>1,2,3</sup>, Xiao-Bin Li<sup>1,2,3</sup>, Gang Zheng<sup>1,2,3</sup>,  
10  
11 4 Zhen-Hua Feng<sup>1,2,3</sup>, Jiang-Wei Xuan<sup>1,2,3</sup>, Zhi-Hao Shen<sup>1,2,3</sup>, Li-Yan Shen<sup>1,2,3</sup>, Wen-Fei Ni<sup>1,2,3,\*</sup> and  
12  
13  
14 5 Ai-Min Wu<sup>1,2,3,\*</sup>  
15  
16  
17 6

18  
19  
20 7 **Affiliations:**

- 21  
22 8 1. Department of Orthopaedics, The Second Affiliated Hospital and Yuying Children's Hospital of  
23  
24 9 Wenzhou Medical University, Wenzhou, Zhejiang, 325027, China.  
25  
26  
27 10 2. The Second School of Medicine, Wenzhou Medical University, Wenzhou, Zhejiang, 325027, China.  
28  
29  
30 11 3. Bone Research Institute, The Key Orthopaedic Laboratory of Zhejiang Province, Wenzhou,  
31  
32 12 Zhejiang, 325027, China.  
33  
34  
35 13 4. Department of Orthopaedics, The Affiliated Hospital of Jiujiang Medical College, Jiujiang, Jiangxi,  
36  
37 14 332000, China.  
38  
39

40 15 **\*Correspondence author:**

41  
42  
43 16 Ai-Min Wu, **email:** aiminwu@wmu.edu.cn

44  
45 17 Wen-Fei Ni, **email:** wenfeini@yeah.net

46  
47  
48 18 **Phone:** +86 0577 88002814;

49  
50 19 **Fax:** +86 057788002823;  
51  
52  
53 20

54  
55  
56 21 Zhi-Chao Hu and Qian Tang contributed equally to this work.  
57  
58  
59 22

1  
2  
3  
4 23 **Abstract**

5  
6 24 **Objective** Inconsistent findings in regard to association between different concentrations of vitamin D,  
7  
8  
9 25 calcium or their combination and the risk of fracture have been reported during the past decade in  
10  
11 26 community-dwelling older people. This study was designed to compare the fracture risk using different  
12  
13  
14 27 concentrations of vitamin D, calcium or their combination.

15  
16  
17 28 **Design** A systematic review and network meta-analysis.

18  
19 29 **Data sources** Randomized controlled trials in PubMed, Cochrane library, and EMBASE databases  
20  
21  
22 30 were systematically searched from the inception dates to December 31, 2017.

23  
24  
25 31 **Outcomes** Total fracture was defined as the primary outcome. Secondary outcomes were hip fracture  
26  
27 32 and vertebral fracture. Due to the consistency of the original studies, a consistency model was adopted.

28  
29  
30 33 **Results** A total of 25 randomized controlled trials involving 43510 participants fulfilled the inclusion  
31  
32 34 criteria. There was no evidence that the risk of total fracture was reduced by using different  
33  
34  
35 35 concentrations of vitamin D, calcium or their combination compared with placebo or no treatment. No  
36  
37 36 significant associations were found between calcium, vitamin D, or combined calcium and vitamin D  
38  
39  
40 37 supplements and the incidence of hip, or vertebral fractures.

41  
42  
43 38 **Conclusions** The use of supplements that included calcium, vitamin D, or both was not found to be  
44  
45 39 better than placebo or no treatment in terms of risk of fractures among community-dwelling older  
46  
47  
48 40 adults. It means the routine use of these supplements in community-dwelling older people should be  
49  
50  
51 41 treated more carefully.

52  
53 42 **Prospero registration number** CRD42017079624

54  
55  
56 43 **Keywords:** Calcium; Vitamin D; Fractures; network meta-analysis

57  
58 44 **Strengths and limitations of this study**  
59  
60

- 1  
2  
3  
4 45 • This systematic review and meta-analysis combined the evidence from randomized controlled trials.  
5  
6 46 • Our findings may not support the routine use of these supplements in community-dwelling older  
7  
8  
9 47 people.  
10  
11 48 • This work does not necessarily preclude any benefit of vitamin D and calcium supplementation in  
12  
13  
14 49 older, frail individuals.  
15  
16  
17 50 • Potential missing data and meta-biases, heterogeneity, which may limit the quality of evidence.  
18

## 19 51 **Introduction**

22 52 Clinical fractures of the elderly represent a worldwide public health problem that leads to illness and  
23  
24 53 social burden. The patients with osteoporosis in the European Union were estimated to be 27.5 million  
25  
26  
27 54 in 2010, and 3.5 million new fragility fractures were sustained<sup>1</sup>. In Asia, the average cost of  
28  
29  
30 55 osteoporotic fractures accounted for 18.95% of the countries' 2014 gross domestic product  
31  
32 56 (GDP)/capita and increased annually<sup>2-4</sup>. The overall prevalence of osteoporosis or low bone mass in  
33  
34  
35 57 non-institutional population over the age of 50 in the USA was estimated at 10.3% and 43.9%,  
36  
37  
38 58 respectively, which means that 10.2 million elderly people had osteoporosis and 43.4 million people  
39  
40 59 had low bone mass in 2010<sup>5</sup>. With the demographic trend of ageing and the predicted increase in life  
41  
42  
43 60 expectancy, the cost of fracture treatment is expected to rise.

45 61 Dietary allowances for calcium range from 700 to 1200 mg/d and vitamin D of 600-800 IU/d have  
46  
47  
48 62 long been recommended for the prevention of osteoporotic fractures in the elderly<sup>6 7</sup>. The supplements  
49  
50  
51 63 of calcium and vitamin D are commonly taken to maintain bone health.

53 64 However, the previous randomized controlled trials (RCT) and meta-analyses concerning vitamin D,  
54  
55  
56 65 calcium, or their combination for fractures yielded different efficacy outcomes. For instance, two  
57  
58  
59 66 meta-analyses demonstrated calcium or vitamin D supplementation alone has a small benefit on bone  
60



1  
2  
3  
4 67 mineral density (BMD), but no clinically important to prevent fractures<sup>8 9</sup>, while an updated  
5  
6 68 meta-analysis and a pooled analysis found calcium plus vitamin D supplementation can significantly  
7  
8  
9 69 reduce hip fractures by 30% and total fractures by 15%<sup>10 11</sup>. Two RCTs reported that low dose of  
10  
11 70 vitamin D supplementation (less than 800 IU/d) can reduce the incidence of falls<sup>12</sup> and may prevent  
12  
13  
14 71 fractures without adverse effects<sup>13</sup>, but other RCTs showed no significant reduction in the incidence of  
15  
16  
17 72 hip or other peripheral fractures<sup>14 15</sup> and its possible effects were seen only in patients with initial  
18  
19  
20 73 calcium insufficiency. Based on the evidence from meta-analysis, Bischoff-Ferrari et al <sup>16</sup> illustrated  
21  
22 74 that high-dose vitamin D supplementation (800 IU/d or higher) not only reduced the risk of falls and  
23  
24  
25 75 hip fractures, but also prevented non-vertebral fractures. In contrast, a study reported annual high-dose  
26  
27  
28 76 oral vitamin D resulted in an increased risk of falls and fractures <sup>17</sup>. On the other hand, low-dose  
29  
30  
31 77 calcium supplementation (less than 800mg/d) effectively led to a sustained reduction in the rate of bone  
32  
33  
34 78 loss <sup>18</sup> and turnover. Although it was also reported that the high dose of calcium (800 mg/d or higher)  
35  
36  
37 79 was associated with a lower risk of clinical fractures <sup>19</sup>. The high-dose calcium with high-dose vitamin  
38  
39  
40 80 D can't prevent fractures according to the evidence from reported RCT <sup>20</sup>, but a meta-analysis  
41  
42  
43 81 supported their combination can prevent bone loss and significantly reduce the risk of hip fractures and  
44  
45  
46 82 all osteoporotic fractures <sup>21</sup>. Thus, it's challenging to conclude a dose-response relation between the  
47  
48  
49 83 intakes of vitamin D, calcium, or their combination and the main outcomes in these heterogeneous  
50  
51  
52 84 literatures.

53  
54  
55  
56 85 Therefore, this study was designed to compare the fracture risk using different concentrations of  
57  
58  
59 86 vitamin D, calcium or their combination, and comprehensively evaluate the optimal concentration to  
60  
87 guide clinical practice and public prevention in community-dwelling older people.

## 88 **Methods**

## 89 Search strategy and selection criteria

90 This review and meta-analysis is based on the Preferred Reporting Items for Systematic Reviews and  
91 Meta-Analysis (PRISMA) extension statement for network meta-analysis. Our meta-analysis was  
92 registered prospectively in PROSPERO (CRD42017079624) and the Checklist PRISMA 2009  
93 (Supplementary Table 1) will be used and check our final reports <sup>22</sup>.

94 We restricted our meta-analysis to the inclusion criteria should meet following details: (1) RCTs; (2)  
95 Interventions must be one of the following three: vitamin D only, calcium only, both vitamin D and  
96 calcium; (3) Complete outcome data of fracture; (4) Trials enrolling adults older than 50 years and  
97 living in their communities; (5) Only studies that lasted more than a year. Exclusion criteria were (1)  
98 Calcium or vitamin D combined with other therapies (eg: hormones, exercise); (2) Trials in which  
99 vitamin D analogues (eg: calcitriol) or hydroxylated vitamin D were used; (3) Trials in which dietary  
100 intake of calcium or vitamin D (eg: from milk) was evaluated; (4) Patients suffering from illness or  
101 long-term use of certain drugs affecting the stability of the calcium metabolism, such as metabolic bone  
102 disease, bone tumour, treatment of steroids and so on.

103 Participants must be randomly assigned to two or more following groups: (1) high calcium (800  
104 mg/d or higher) only; (2) low calcium (less than 800 mg/d) only; (3) high vitamin D (800 IU/d or  
105 higher) only; (4) low vitamin D (less than 800 IU/d) only; (5) high calcium (800 mg/d or higher) + high  
106 vitamin D (800 IU/d or higher); (6) high calcium + low vitamin D (less than 800 IU/d); (7) low calcium  
107 (less than 800 mg/d) + high vitamin D; (8) low calcium + low vitamin D; (9) placebo. The  
108 interventions should be compared with placebo.

109 Two authors (ZHF and GZ) independently searched the electronic literature database of PubMed,  
110 Embase, Cochrane database on December 31, 2017 (detailed search strategies are reported

1  
2  
3  
4 111 in **supplementary eTable 1**). Related articles and reference lists were searched to avoid original  
5  
6 112 miss. The reference studies of previous systematic reviews, meta-analysis, and included studies were  
7  
8  
9 113 manually searched to avoid initial miss. After 2 authors assessed the potentially eligible studies  
10  
11  
12 114 independently, any disagreement was discussed and resolved with the third independent author (QT).

#### 13 14 115 **Data collection and assessment of risk of bias**

15  
16  
17 116 Two reviewers (ZHS and XBL) independently extracted data, and the third reviewer (LT) checked  
18  
19  
20 117 the consistency between them. A standard data extracted form was used at this stage, including the  
21  
22 118 authors, publishing date, country, participant characteristics; doses of calcium, vitamin D, or their  
23  
24  
25 119 combination; dietary calcium intake; baseline serum 25-hydroxyvitamin D concentration; and trial  
26  
27 120 duration. For continuous outcomes, the mean, SD (standard deviation) and participant number will be  
28  
29  
30 121 extracted. For dichotomous outcomes, we extracted the total numbers and the numbers of events of  
31  
32  
33 122 both groups. The data in other forms was recalculated when possible to enable pooled analysis.

34  
35 123 We used the Cochrane risk of bias tool to assess risk bias of included studies. The tool has seven  
36  
37  
38 124 domains including random sequence generation, allocation concealment, blinding of participants and  
39  
40  
41 125 personnel, blinding of outcome assessment, incomplete outcome data, selective reporting and other  
42  
43 126 bias. The classification of the judgment for each domain was low risk of bias, high risk of bias, or  
44  
45  
46 127 unclear risk of bias and two authors (ZHF and GZ) independently evaluated the risk of studies.

#### 47 48 128 **Data synthesis and statistical analysis**

49  
50  
51 129 The data was extracted and input into the STATA software (version 12.0; StataCorp, College  
52  
53 130 Station, TX, USA) for network meta-analysis. And we generated network plots for each outcome to  
54  
55  
56 131 illustrate which interventions had been compared directly in the included studies. Network  
57  
58  
59 132 meta-analysis is an extension of standard meta-analysis to compare multiple treatments based on  
60

1  
2  
3  
4 133 randomized controlled trial evidence, which forms a connected network of comparisons. Treatment  
5  
6 134 effect estimates from network meta-analysis exploit both the direct comparisons within trials and the  
7  
8  
9 135 indirect comparisons across trials. To choose the random effects or fixed effects model, we either make  
10  
11 136 a judgement about what is most likely to be appropriate based on the assumptions of the different  
12  
13  
14 137 models or conduct both fixed or random effects and compare which seems to fit the data better<sup>23</sup>.  
15  
16  
17 138 Relative risk (RR) with 95% confidence intervals (CIs) was calculated for dichotomous outcomes  
18  
19 139 while weighted mean difference (WMD) with 95% CIs for the continuous. Inconsistency refers to  
20  
21  
22 140 differences between direct and various indirect effect estimates for the same comparison. To assess  
23  
24  
25 141 inconsistency, we estimated the inconsistency factors in closed loop based on the method described by  
26  
27 142 Chaimani et al<sup>24</sup>. The heterogeneity in each closed loop was estimated by utilizing inconsistency factor  
28  
29  
30 143 (IF). If the 95% confidence intervals (95% CI) of IF values are not truncated at zero, it suggests that the  
31  
32  
33 144 inconsistency among studies has statistical significance. We used the surface under the cumulative  
34  
35  
36 145 ranking probabilities (SUCRA) to indicate which treatment was the best one. The funnel plot was used  
37  
38 146 to identify possible publication bias if the number of studies was larger than 10.

#### 147 **Patient and public involvement**

148 No patients were involved in setting the research question or the outcome measures, and no patients  
149 were involved in developing plans for design or implementation of the study. Furthermore, no patients  
150 were asked to advice on interpretation or writing up of results. Since this meta-analysis used  
151 aggregated data from previous trials, it is unable to disseminate the results of the research to study  
152 participants directly.

#### 153 **Result**

#### 154 **Data Retrieval**

1  
2  
3  
4 155 In summary, a total of 7909 potential records were initially identified through PubMed (5187),  
5  
6 156 Embase (2688), Cochrane Data base (34). Based on our review of the title and abstract, 99 full-text  
7  
8  
9 157 papers were reviewed and 25 studies<sup>13 17 19 20 25-45</sup> met inclusion criteria (**Figure 1**).

## 11 158 **Study and Patient Characteristics**

12  
13  
14 159 The characteristics of all 25 included studies were summarized and shown in **supplementary Table**  
15  
16  
17 160 **2**. And the detailed data of outcomes was collected in **supplementary Table 3**. The papers had similar  
18  
19 161 distributions of sex, age, country, intervention and all of them were community-dwelling older people.  
20  
21  
22 162 Hansson et al<sup>29</sup> did not report the residential status of participants, although a previous meta-analysis  
23  
24 163 classified this status as community. The trial by Hansson et al was included, but a sensitivity analysis  
25  
26  
27 164 was performed that excluded that trial (**supplementary Figure 1**).

28  
29  
30 165 **Supplementary Figure 2** showed the assessment of the risk of bias. All studies were randomized;  
31  
32 166 17 were double-blind, placebo-controlled trials; 13 trials described an adequate random sequence  
33  
34  
35 167 generation process; and 11 trials described the methods used for allocation concealment. No obvious  
36  
37  
38 168 publication bias was reported according to the **supplementary Figure 3, supplementary Figure 4** and  
39  
40 169 **supplementary Figure 5**.

## 41 170 **Inconsistence and heterogeneity check**

42  
43  
44  
45 171 The statistical inconsistency between direct and indirect comparisons was generally low according to  
46  
47  
48 172 inconsistency test because the CI values included zero (**supplementary Figure 6, supplementary**  
49  
50 173 **Figure 7, supplementary Figure 8**). Therefore, we adopted a consistency model in all three groups.  
51  
52  
53 174 Meanwhile, the global heterogeneity parameter  $I^2$  values were 8.4%, 0% and 0% respectively, which  
54  
55  
56 175 indicated no obvious heterogeneity was observed in all these results (**supplementary Figure 9,**  
57  
58 176 **supplementary Figure 10, supplementary Figure 11**).

1  
2  
3  
4 177 **Primary outcome: total fracture**

5  
6 178 For estimating the vitamin D, calcium or their combination efficacy against total fractures, we  
7  
8  
9 179 looked at data from 24965 individuals from 18 studies<sup>13 17 19 20 25 26 28 30 31 33-35 37 39 40 43-45</sup>. Pooled  
10  
11 180 estimates included 15 studies with one treatment, 1 study with two treatments, and 2 studies with three  
12  
13 181 treatments.

14  
15  
16 182 The network plot of comparisons on total fractures was shown in **Figure 2A**. The forest plot for the  
17  
18 183 network meta-analysis was shown in **Figure 3**. The RR values and 95% CIs are summarized in **Figure**  
19  
20 184 **3**. The direct and indirect comparisons indicated no differences among the vitamin D, calcium or their  
21  
22 185 combination that remained in the main network. Neither do the statistical differences between  
23  
24 186 interventions and placebo ( $P<0.05$ ). So we didn't continue to make ranking graph of distribution of  
25  
26 187 probabilities on total fractures.

27  
28  
29  
30  
31  
32 188 **Secondary outcomes: hip fracture and vertebral fracture**

33  
34  
35 189 A total of 41845 individuals were included from 16 studies<sup>13 17 19 20 25-28 30 32 33 37 39 40 42 43</sup> for evaluate  
36  
37 190 the drug efficacy against hip fractures. Pooled estimates included 13 studies with one treatment, 1 study  
38  
39 191 with two treatments, and two studies with three treatments.

40  
41  
42 192 The network plot of comparisons on hip fractures was shown in **Figure 2B**. The forest plot for the  
43  
44 193 network meta-analysis was shown in **Figure 4**. The RR values and 95% CIs are summarized in **Figure**  
45  
46 194 **4**. The direct and indirect comparisons indicated no differences among the vitamin D, calcium or their  
47  
48 195 combination that remained in the main network. Neither do the statistical differences between drug  
49  
50 196 experimental groups and placebo ( $P<0.05$ ). So we didn't continue to make ranking graph of  
51  
52 197 distribution of probabilities on total fractures.

53  
54  
55  
56  
57  
58 198 A total of 17612 individuals were collected from 12 studies<sup>13 17 19 20 25 28 29 36 38-41</sup> involving vertebral  
59  
60

1  
2  
3  
4 199 fractures. Pooled estimates included 10 studies with one treatment, and two studies with three  
5  
6 200 treatments.

7  
8  
9 201 The network plot of comparisons on vertebral fractures was shown in **Figure 2C**. The forest plot for  
10  
11 202 the network meta-analysis was shown in **Figure 5**. The RR values and 95% CIs are summarized in  
12  
13  
14 203 **Figure 5**. The direct and indirect comparisons indicated no differences among the vitamin D, calcium  
15  
16  
17 204 or their combination that remained in the main network. Neither do the statistical differences between  
18  
19  
20 205 drug experimental groups and placebo ( $P < 0.05$ ). So we didn't continue to make ranking graph of  
21  
22 206 distribution of probabilities on total fractures. In a separate sensitivity analysis, we excluded Hansson's  
23  
24  
25 207 study<sup>29</sup> (**supplementary Figure 1**). However, there was still no significant association of vitamin D,  
26  
27 208 calcium or their combination with total fracture.

## 29 209 **Discussion**

30  
31  
32 210 Vitamin D supplementation and calcium are suggested as interventions to treat and prevent fracture.  
33  
34  
35 211 We found the previous meta-analyses and RCTs are critically inconsistent in efficacy of different doses  
36  
37  
38 212 of vitamin D with calcium on fractures.

39  
40 213 Results of this meta-analysis showed that calcium, calcium plus vitamin D, and vitamin D  
41  
42  
43 214 supplementation alone were not significantly associated with a lower incidence of hip, vertebral, or  
44  
45  
46 215 total fractures in community-dwelling older adults. Sensitivity analyses that excluded low-quality trials  
47  
48  
49 216 and studies that exclusively enrolled patients with particular medical conditions did not alter these  
50  
51 217 results.

52  
53 218 A meta-analysis conducted by Jia-Guo Zhao et al<sup>46</sup> showed that no significant difference was found  
54  
55  
56 219 in the incidence of hip or other fractures, which was similar to our result. However, the object of  
57  
58  
59 220 Zhao's study was to investigate whether calcium, vitamin D, or combined calcium and vitamin D  
60

1  
2  
3  
4 221 supplement are associated with a lower fracture incidence while our study was designed to evaluate the  
5  
6 222 optimal concentration of them. Meanwhile, in Zhao's meta-analysis, the participants of the included  
7  
8  
9 223 study reported by Massart<sup>47</sup> were adult maintenance hemodialysis patients, which may result in the  
10  
11 224 imbalance of calcium in the body. Patients on hemodialysis may also be receiving  
12  
13  
14 225 1,25-dihydroxyvitamin D, which may affect their response to vitamin D supplementation. So we did  
15  
16  
17 226 not include that trial in our network meta-analysis. What's more, we didn't include studies that lasted  
18  
19 227 less than a year because we thought this time-frame was too short to see anti-fracture efficacy. And we  
20  
21  
22 228 suspected that a network meta-analysis might be a more suitable choice concerning all these different  
23  
24  
25 229 interventions mixed.

26  
27 230 Bischoff-Ferrari et al <sup>48</sup> reported that high-dose vitamin D supplementation (800 IU/d or higher)  
28  
29  
30 231 played an important role in the reduction of the risk of falls and hip fractures, as well as prevented  
31  
32 232 non-vertebral fractures in adults 65 years or older. However, their findings may have been influenced  
33  
34  
35 233 by the trial of Chapuy et al <sup>49</sup>, which only enrolled participants living in an institution. What's more,  
36  
37  
38 234 differences in conclusions of previous meta-analyses and the current meta-analysis were due to the  
39  
40 235 recently published trials which reported neutral or harmful associations of vitamin D supplementation  
41  
42  
43 236 and fracture incidence more and more. Study findings here indicated that vitamin D might result in a  
44  
45  
46 237 higher risk for hip fracture, but this conclusion did not reach statistical significance. This finding may  
47  
48  
49 238 be attributable to lack of statistical power in this meta-analysis.

50  
51 239 Most recently there was a meta-analysis published in the Lancet by Bolland et al<sup>50</sup>, whose findings  
52  
53 240 suggested that vitamin D supplementation does not prevent fractures or falls, or have clinically  
54  
55  
56 241 meaningful effects on bone mineral density. Although it was similar to our study to some extent, they  
57  
58  
59 242 are really different. First, we only included community-dwelling older people. We found that some  
60



1  
2  
3  
4 243 meta-analyses equated community-dwelling older people with those in nursing institution. The lack of  
5  
6  
7 244 exercise, dietary intake and exposure to sunlight made people in nursing institution turned more  
8  
9 245 susceptible to the use of supplements including vitamin D, calcium or their combination. Although the  
10  
11  
12 246 studies involving participants living in nursing institution were only a small part, but it could change  
13  
14  
15 247 the whole outcomes and produce false positive results. We found only Avenell's study paid attention to  
16  
17  
18 248 this question when they conducted a subgroup analysis, but they did not discussed separately.  
19  
20  
21 249 Meanwhile, we only enrolled adults older than 50 years and trial duration more than 1 year to reduce  
22  
23  
24 250 the statistical heterogeneity in network meta-analysis. Furthermore, the current analyses included  
25  
26  
27 251 calcium supplementation, where the Bolland's study focused on vitamin D.

27 252 However, possible limitations of this study protocol include potential missing data and meta-biases,  
28  
29  
30 253 heterogeneity, which may limit the quality of evidence. Some RCTs were of poor quality and, for  
31  
32  
33 254 example, used unclear allocation concealment. So we made a sensitivity analysis by excluding  
34  
35  
36 255 low-quality trials. Meanwhile, some study characteristics such as baseline serum 25-hydroxyvitamin D  
37  
38  
39 256 concentrations might be to contribute heterogeneity so future analyses are still needed to explore this  
40  
41  
42 257 potential heterogeneity. What's more, we combined bolus dosing by injection with oral supplements  
43  
44  
45 258 taken daily/monthly/yearly, which might have different effects on vitamin D status in the body. In  
46  
47  
48 259 addition, the report ignored the effect of treatment with vitamin D on plasma 25-hydroxy-vitamin D  
49  
50  
51 260 concentrations and sub-types of fracture, such as pathologic fractures; this work does not necessarily  
52  
53  
54 261 preclude any benefit of vitamin D and calcium supplementation in older, frail individuals.

## 262 **Conclusions**

263 In this meta-analysis of randomized clinical trials, we found that the use of different concentrations of  
264  
265  
266 264 vitamin D, calcium or their combination in community-dwelling older adults was not associated with a

1  
2  
3  
4 265 lower risk of fractures. Our findings may not support the routine use of these supplements in  
5  
6 266 community-dwelling older people.  
7  
8

9 267 **Contributors**

10  
11 268 ZCH and AMW conceived the study. The search strategy was developed by LT and XBL. ZHF, GZ  
12  
13  
14 269 and QT will complete electronic search, select publications and assess their eligibility. ZHS and XBL  
15  
16  
17 270 will extract information of the included studies after screening. JWX will check the data entry for  
18  
19  
20 271 accuracy and completeness. ZCH and LT will give advice for data analysis and presentation of study  
21  
22  
23 272 result. LYS and CMS contributed to the text revision. WFN and AMW supervised the overall conduct  
24  
25 273 of the study. All the authors drafted and critically reviewed and approved the final manuscript.  
26

27 274 **Funds and Acknowledgement**

28  
29  
30 275 This work was funded by the National Natural Science Foundation of China (81501933, 81572214),  
31  
32  
33 276 Zhejiang Provincial Natural Science Foundation of China (LY14H060008), Zhejiang Provincial  
34  
35 277 Medical Technology Foundation of China (2018254309, 2015111494), Wenzhou leading talent  
36  
37  
38 278 innovative project (RX2016004) and Wenzhou Municipal Science and Technology Bureau  
39  
40 279 (Y20170389). The funders had no role in the design, execution, or writing of the study.  
41  
42

43 280 **Conflicts of interest**

44  
45 281 None declared  
46  
47

48 282 **Patient consent**

49  
50 283 Not required.  
51  
52

53 284 **Provenance and peer review**

54  
55  
56 285 Not commissioned; externally peer reviewed.  
57

58 286 **Data availability statement**  
59  
60

1  
2  
3  
4  
5  
6  
7  
8  
9  
10  
11  
12  
13  
14  
15  
16  
17  
18  
19  
20  
21  
22  
23  
24  
25  
26  
27  
28  
29  
30  
31  
32  
33  
34  
35  
36  
37  
38  
39  
40  
41  
42  
43  
44  
45  
46  
47  
48  
49  
50  
51  
52  
53  
54  
55  
56  
57  
58  
59  
60

287 All data relevant to the study are included in the article or uploaded as supplementary information.

## 288 **References**

- 289 1. Svedbom A, Hernlund E, Ivergard M, et al. Osteoporosis in the European Union: a compendium of  
290 country-specific reports. *Arch Osteoporos* 2013;8:137. doi: 10.1007/s11657-013-0137-0
- 291 2. Mohd-Tahir NA, Li SC. Economic burden of osteoporosis-related hip fracture in Asia: a systematic  
292 review. *Osteoporos Int* 2017;28(7):2035-44. doi: 10.1007/s00198-017-3985-4
- 293 3. Kim J, Lee E, Kim S, et al. Economic Burden of Osteoporotic Fracture of the Elderly in South Korea: A  
294 National Survey. *Value Health Reg Issues* 2016;9:36-41. doi: 10.1016/j.vhri.2015.09.007
- 295 4. Qu B, Ma Y, Yan M, et al. The economic burden of fracture patients with osteoporosis in western  
296 China. *Osteoporos Int* 2014;25(7):1853-60. doi: 10.1007/s00198-014-2699-0
- 297 5. Wright NC, Looker AC, Saag KG, et al. The recent prevalence of osteoporosis and low bone mass in  
298 the United States based on bone mineral density at the femoral neck or lumbar spine. *J Bone*  
299 *Miner Res* 2014;29(11):2520-6. doi: 10.1002/jbmr.2269
- 300 6. Consensus conference: Osteoporosis. *JAMA* 1984;252(6):799-802.
- 301 7. Ross AC. The 2011 report on dietary reference intakes for calcium and vitamin D. *Public Health Nutr*  
302 2011;14(5):938-9. doi: 10.1017/S1368980011000565
- 303 8. Shea B, Wells G, Cranney A, et al. Meta-analyses of therapies for postmenopausal osteoporosis. VII.  
304 Meta-analysis of calcium supplementation for the prevention of postmenopausal  
305 osteoporosis. *Endocr Rev* 2002;23(4):552-9. doi: 10.1210/er.2001-7002
- 306 9. Reid IR, Bolland MJ, Grey A. Effects of vitamin D supplements on bone mineral density: a systematic  
307 review and meta-analysis. *Lancet* 2014;383(9912):146-55. doi:  
308 10.1016/s0140-6736(13)61647-5 [published Online First: 2013/10/15]
- 309 10. Weaver CM, Alexander DD, Boushey CJ, et al. Calcium plus vitamin D supplementation and risk of  
310 fractures: an updated meta-analysis from the National Osteoporosis Foundation. *Osteoporos*  
311 *Int* 2016;27(1):367-76. doi: 10.1007/s00198-015-3386-5
- 312 11. Group D. Patient level pooled analysis of 68 500 patients from seven major vitamin D fracture  
313 trials in US and Europe. *BMJ* 2010;340:b5463. doi: 10.1136/bmj.b5463
- 314 12. Flicker L, MacInnis RJ, Stein MS, et al. Should older people in residential care receive vitamin D to  
315 prevent falls? Results of a randomized trial. *J Am Geriatr Soc* 2005;53(11):1881-8. doi:  
316 10.1111/j.1532-5415.2005.00468.x [published Online First: 2005/11/09]
- 317 13. Trivedi DP, Doll R, Khaw KT. Effect of four monthly oral vitamin D3 (cholecalciferol)  
318 supplementation on fractures and mortality in men and women living in the community:  
319 randomised double blind controlled trial. *Bmj* 2003;326(7387):469. doi:  
320 10.1136/bmj.326.7387.469 [published Online First: 2003/03/01]
- 321 14. Lyons RA, Johansen A, Brophy S, et al. Preventing fractures among older people living in  
322 institutional care: a pragmatic randomised double blind placebo controlled trial of vitamin D  
323 supplementation. *Osteoporos Int* 2007;18(6):811-8. doi: 10.1007/s00198-006-0309-5  
324 [published Online First: 2007/05/03]
- 325 15. Law M, Withers H, Morris J, et al. Vitamin D supplementation and the prevention of fractures and  
326 falls: results of a randomised trial in elderly people in residential accommodation. *Age*  
327 *Ageing* 2006;35(5):482-6. doi: 10.1093/ageing/afj080 [published Online First: 2006/04/28]
- 328 16. Bischoff-Ferrari HA, Willett WC, Wong JB, et al. Prevention of nonvertebral fractures with oral

- 1  
2  
3 329 vitamin D and dose dependency: a meta-analysis of randomized controlled trials. *Arch Intern*  
4 330 *Med* 2009;169(6):551-61. doi: 10.1001/archinternmed.2008.600 [published Online First:  
5 331 2009/03/25]
- 7 332 17. Sanders KM, Stuart AL, Williamson EJ, et al. Annual high-dose oral vitamin D and falls and fractures  
8 333 in older women: a randomized controlled trial. *Jama* 2010;303(18):1815-22. doi:  
9 334 10.1001/jama.2010.594 [published Online First: 2010/05/13]
- 11 335 18. Nakamura K, Saito T, Kobayashi R, et al. Effect of low-dose calcium supplements on bone loss in  
12 336 perimenopausal and postmenopausal Asian women: a randomized controlled trial. *J Bone*  
13 337 *Miner Res* 2012;27(11):2264-70. doi: 10.1002/jbmr.1676
- 15 338 19. Prince RL, Devine A, Dhaliwal SS, et al. Effects of calcium supplementation on clinical fracture and  
16 339 bone structure: results of a 5-year, double-blind, placebo-controlled trial in elderly women.  
17 340 *Arch Intern Med* 2006;166(8):869-75. doi: 10.1001/archinte.166.8.869 [published Online  
18 341 First: 2006/04/26]
- 20 342 20. Salovaara K, Tuppurainen M, Karkkainen M, et al. Effect of vitamin D(3) and calcium on fracture  
21 343 risk in 65- to 71-year-old women: a population-based 3-year randomized, controlled  
22 344 trial--the OSTPRE-FPS. *J Bone Miner Res* 2010;25(7):1487-95. doi: 10.1002/jbmr.48  
23 345 [published Online First: 2010/03/05]
- 25 346 21. Boonen S, Lips P, Bouillon R, et al. Need for additional calcium to reduce the risk of hip fracture  
26 347 with vitamin d supplementation: evidence from a comparative metaanalysis of randomized  
27 348 controlled trials. *J Clin Endocrinol Metab* 2007;92(4):1415-23. doi: 10.1210/jc.2006-1404  
28 349 [published Online First: 2007/02/01]
- 30 350 22. Moher D, Liberati A, Tetzlaff J, et al. Preferred reporting items for systematic reviews and  
31 351 meta-analyses: the PRISMA statement. *PLoS Med* 2009;6(7):e1000097. doi:  
32 352 10.1371/journal.pmed.1000097
- 34 353 23. Zintzaras E, Ioannidis JP. Heterogeneity testing in meta-analysis of genome searches. *Genet*  
35 354 *Epidemiol* 2005;28(2):123-37. doi: 10.1002/gepi.20048 [published Online First: 2004/12/14]
- 37 355 24. Chaimani A, Higgins JP, Mavridis D, et al. Graphical tools for network meta-analysis in STATA. *PLoS*  
38 356 *One* 2013;8(10):e76654. doi: 10.1371/journal.pone.0076654 [published Online First:  
39 357 2013/10/08]
- 41 358 25. Avenell A, Grant AM, McGee M, et al. The effects of an open design on trial participant  
42 359 recruitment, compliance and retention--a randomized controlled trial comparison with a  
43 360 blinded, placebo-controlled design. *Clin Trials* 2004;1(6):490-8. doi:  
44 361 10.1191/1740774504cn053oa [published Online First: 2005/11/11]
- 46 362 26. Baron JA, Beach M, Mandel JS, et al. Calcium supplements for the prevention of colorectal  
47 363 adenomas. Calcium Polyp Prevention Study Group. *N Engl J Med* 1999;340(2):101-7. doi:  
48 364 10.1056/nejm199901143400204 [published Online First: 1999/01/14]
- 50 365 27. Dawson-Hughes B, Harris SS, Krall EA, et al. Effect of calcium and vitamin D supplementation on  
51 366 bone density in men and women 65 years of age or older. *N Engl J Med* 1997;337(10):670-6.  
52 367 doi: 10.1056/nejm199709043371003 [published Online First: 1997/09/04]
- 54 368 28. Grant AM, Avenell A, Campbell MK, et al. Oral vitamin D3 and calcium for secondary prevention of  
55 369 low-trauma fractures in elderly people (Randomised Evaluation of Calcium Or vitamin D,  
56 370 RECORD): a randomised placebo-controlled trial. *Lancet* 2005;365(9471):1621-8. doi:  
57 371 10.1016/s0140-6736(05)63013-9 [published Online First: 2005/05/12]
- 59 372 29. Hansson T, Roos B. The effect of fluoride and calcium on spinal bone mineral content: a  
60

- 1  
2  
3 373 controlled, prospective (3 years) study. *Calcif Tissue Int* 1987;40(6):315-7. [published Online  
4 374 First: 1987/06/01]
- 5  
6 375 30. Harwood RH, Sahota O, Gaynor K, et al. A randomised, controlled comparison of different calcium  
7 376 and vitamin D supplementation regimens in elderly women after hip fracture: The  
8 377 Nottingham Neck of Femur (NONOF) Study. *Age Ageing* 2004;33(1):45-51. [published Online  
9 378 First: 2003/12/30]
- 10  
11 379 31. Hin H, Tomson J, Newman C, et al. Optimum dose of vitamin D for disease prevention in older  
12 380 people: BEST-D trial of vitamin D in primary care. *Osteoporos Int* 2017;28(3):841-51. doi:  
13 381 10.1007/s00198-016-3833-y [published Online First: 2016/12/18]
- 14  
15 382 32. Jackson RD, LaCroix AZ, Gass M, et al. Calcium plus vitamin D supplementation and the risk of  
16 383 fractures. *N Engl J Med* 2006;354(7):669-83. doi: 10.1056/NEJMoa055218 [published Online  
17 384 First: 2006/02/17]
- 18  
19 385 33. Lips P, Graafmans WC, Ooms ME, et al. Vitamin D supplementation and fracture incidence in  
20 386 elderly persons. A randomized, placebo-controlled clinical trial. *Ann Intern Med*  
21 387 1996;124(4):400-6. [published Online First: 1996/02/15]
- 22  
23 388 34. Liu BX, Chen SP, Li YD, et al. The Effect of the Modified Eighth Section of Eight-Section Brocade on  
24 389 Osteoporosis in Postmenopausal Women: A Prospective Randomized Trial. *Medicine*  
25 390 (*Baltimore*) 2015;94(25):e991. doi: 10.1097/md.0000000000000991 [published Online First:  
26 391 2015/06/25]
- 27  
28 392 35. Mitri J, Dawson-Hughes B, Hu FB, et al. Effects of vitamin D and calcium supplementation on  
29 393 pancreatic beta cell function, insulin sensitivity, and glycemia in adults at high risk of  
30 394 diabetes: the Calcium and Vitamin D for Diabetes Mellitus (CaDDM) randomized controlled  
31 395 trial. *Am J Clin Nutr* 2011;94(2):486-94. doi: 10.3945/ajcn.111.011684 [published Online First:  
32 396 2011/07/01]
- 33  
34 397 36. Peacock M, Liu G, Carey M, et al. Effect of calcium or 25OH vitamin D3 dietary supplementation  
35 398 on bone loss at the hip in men and women over the age of 60. *J Clin Endocrinol Metab*  
36 399 2000;85(9):3011-9. doi: 10.1210/jcem.85.9.6836 [published Online First: 2000/09/22]
- 37  
38 400 37. Porthouse J, Cockayne S, King C, et al. Randomised controlled trial of calcium and  
39 401 supplementation with cholecalciferol (vitamin D3) for prevention of fractures in primary  
40 402 care. *Bmj* 2005;330(7498):1003. doi: 10.1136/bmj.330.7498.1003 [published Online First:  
41 403 2005/04/30]
- 42  
43 404 38. Recker RR, Hinders S, Davies KM, et al. Correcting calcium nutritional deficiency prevents spine  
44 405 fractures in elderly women. *J Bone Miner Res* 1996;11(12):1961-6. doi:  
45 406 10.1002/jbmr.5650111218 [published Online First: 1996/12/01]
- 46  
47 407 39. Reid IR, Ames RW, Evans MC, et al. Effect of calcium supplementation on bone loss in  
48 408 postmenopausal women. *N Engl J Med* 1993;328(7):460-4. doi:  
49 409 10.1056/nejm199302183280702 [published Online First: 1993/02/18]
- 50  
51 410 40. Reid IR, Mason B, Horne A, et al. Randomized controlled trial of calcium in healthy older women.  
52 411 *Am J Med* 2006;119(9):777-85. doi: 10.1016/j.amjmed.2006.02.038 [published Online First:  
53 412 2006/09/02]
- 54  
55 413 41. Riggs BL, O'Fallon WM, Muhs J, et al. Long-term effects of calcium supplementation on serum  
56 414 parathyroid hormone level, bone turnover, and bone loss in elderly women. *J Bone Miner Res*  
57 415 1998;13(2):168-74. doi: 10.1359/jbmr.1998.13.2.168 [published Online First: 1998/03/12]
- 58  
59 416 42. Smith H, Anderson F, Raphael H, et al. Effect of annual intramuscular vitamin D on fracture risk in

- 1  
2  
3 417 elderly men and women--a population-based, randomized, double-blind, placebo-controlled  
4 418 trial. *Rheumatology (Oxford)* 2007;46(12):1852-7. doi: 10.1093/rheumatology/kem240  
5 419 [published Online First: 2007/11/14]  
6  
7 420 43. Uusi-Rasi K, Patil R, Karinkanta S, et al. Exercise and vitamin D in fall prevention among older  
8 421 women: a randomized clinical trial. *JAMA Intern Med* 2015;175(5):703-11. doi:  
9 422 10.1001/jamainternmed.2015.0225 [published Online First: 2015/03/24]  
10  
11 423 44. Witham MD, Price RJ, Struthers AD, et al. Cholecalciferol treatment to reduce blood pressure in  
12 424 older patients with isolated systolic hypertension: the VitDISH randomized controlled trial.  
13 425 *JAMA Intern Med* 2013;173(18):1672-9. doi: 10.1001/jamainternmed.2013.9043 [published  
14 426 Online First: 2013/08/14]  
15  
16 427 45. Xue Y, Hu Y, Wang O, et al. Effects of Enhanced Exercise and Combined Vitamin D and Calcium  
17 428 Supplementation on Muscle Strength and Fracture Risk in Postmenopausal Chinese Women.  
18 429 *Zhongguo Yi Xue Ke Xue Yuan Xue Bao* 2017;39(3):345-51. doi:  
19 430 10.3881/j.issn.1000-503X.2017.03.008 [published Online First: 2017/07/12]  
20  
21 431 46. Zhao JG, Zeng XT, Wang J, et al. Association Between Calcium or Vitamin D Supplementation and  
22 432 Fracture Incidence in Community-Dwelling Older Adults: A Systematic Review and  
23 433 Meta-analysis. *Jama* 2017;318(24):2466-82. doi: 10.1001/jama.2017.19344 [published  
24 434 Online First: 2017/12/28]  
25  
26 435 47. Massart A, Debelle FD, Racape J, et al. Biochemical parameters after cholecalciferol repletion in  
27 436 hemodialysis: results From the VitaDial randomized trial. *Am J Kidney Dis*  
28 437 2014;64(5):696-705. doi: 10.1053/j.ajkd.2014.04.020 [published Online First: 2014/05/27]  
29  
30 438 48. Bischoff-Ferrari HA, Willett WC, Orav EJ, et al. A pooled analysis of vitamin D dose requirements  
31 439 for fracture prevention. *N Engl J Med* 2012;367(1):40-9. doi: 10.1056/NEJMoa1109617  
32 440 [published Online First: 2012/07/06]  
33  
34 441 49. Chapuy MC, Arlot ME, Duboeuf F, et al. Vitamin D3 and calcium to prevent hip fractures in elderly  
35 442 women. *N Engl J Med* 1992;327(23):1637-42. doi: 10.1056/nejm199212033272305  
36 443 [published Online First: 1992/12/03]  
37  
38 444 50. Bolland MJ, Grey A, Avenell A. Effects of vitamin D supplementation on musculoskeletal health: a  
39 445 systematic review, meta-analysis, and trial sequential analysis. *Lancet Diabetes Endocrinol*  
40 446 2018;6(11):847-58. doi: 10.1016/s2213-8587(18)30265-1 [published Online First:  
41 447 2018/10/09]  
42  
43 448

449 **Legends:**

450 **Figure 1.** The selection of literature for included studies.

451 **Figure 2.** The network plot of comparisons on total fractures (A), hip fractures (B) and vertebral

1  
2  
3  
4  
5  
6  
7  
8  
9  
10  
11  
12  
13  
14  
15  
16  
17  
18  
19  
20  
21  
22  
23  
24  
25  
26  
27  
28  
29  
30  
31  
32  
33  
34  
35  
36  
37  
38  
39  
40  
41  
42  
43  
44  
45  
46  
47  
48  
49  
50  
51  
52  
53  
54  
55  
56  
57  
58  
59  
60

452 fractures (C). A: high calcium (800 mg/d or higher); B: low calcium (less than 800 mg/d); C: high  
453 vitamin D (800 IU/d or higher); D: low vitamin D (less than 800 IU/d)

454 **Figure 3.** The forest plot for the risk of total fractures. A: high calcium (800 mg/d or higher); B: low  
455 calcium (less than 800 mg/d); C: high vitamin D (800 IU/d or higher); D: low vitamin D (less than  
456 800 IU/d)

457 **Figure 4.** The forest plot for the risk of hip fractures. A: high calcium (800 mg/d or higher); B: low  
458 calcium (less than 800 mg/d); C: high vitamin D (800 IU/d or higher); D: low vitamin D (less than  
459 800 IU/d)

460 **Figure 5.** The forest plot for the risk of vertebral fractures. A: high calcium (800 mg/d or higher); B:  
461 low calcium (less than 800 mg/d); C: high vitamin D (800 IU/d or higher); D: low vitamin D (less  
462 than 800 IU/d)

463 **supplementary Figure 1.** A sensitivity analysis excluded the trial of Hansson et al. A: high calcium  
464 (800 mg/d or higher); B: low calcium (less than 800 mg/d); C: high vitamin D (800 IU/d or higher);  
465 D: low vitamin D (less than 800 IU/d)

466 **supplementary Figure 2.** Risk of Bias Assessment of All Included Studies

467 **supplementary Figure 3.** Publication bias for the total fractures. A: high calcium (800 mg/d or higher);

1  
2  
3  
4 468 B: low calcium (less than 800 mg/d); C: high vitamin D (800 IU/d or higher); D: low vitamin D (less  
5  
6 469 than 800 IU/d)  
7  
8  
9

10  
11 470 **supplementary Figure 4.** Publication bias for the hip fractures. A: high calcium (800 mg/d or higher);  
12  
13  
14 471 B: low calcium (less than 800 mg/d); C: high vitamin D (800 IU/d or higher); D: low vitamin D (less  
15  
16  
17 472 than 800 IU/d)  
18  
19

20  
21  
22 473 **supplementary Figure 5.** Publication bias for the vertebral fractures. A: high calcium (800 mg/d or  
23  
24  
25 474 higher); B: low calcium (less than 800 mg/d); C: high vitamin D (800 IU/d or higher); D: low  
26  
27 475 vitamin D (less than 800 IU/d)  
28  
29

30  
31  
32 476 **supplementary Figure 6.** Inconsistency test for the total fractures. A: high calcium (800 mg/d or  
33  
34  
35 477 higher); B: low calcium (less than 800 mg/d); C: high vitamin D (800 IU/d or higher); D: low  
36  
37 478 vitamin D (less than 800 IU/d)  
38  
39

40  
41  
42  
43 479 **supplementary Figure 7.** Inconsistency test for the hip fractures. A: high calcium (800 mg/d or  
44  
45  
46 480 higher); B: low calcium (less than 800 mg/d); C: high vitamin D (800 IU/d or higher); D: low  
47  
48 481 vitamin D (less than 800 IU/d)  
49

50  
51  
52  
53 482 **supplementary Figure 8.** Inconsistency test for the vertebral fractures. A: high calcium (800 mg/d or  
54  
55  
56 483 higher); B: low calcium (less than 800 mg/d); C: high vitamin D (800 IU/d or higher); D: low  
57  
58 484 vitamin D (less than 800 IU/d)  
59  
60



1  
2  
3  
4  
5  
6  
7  
8  
9  
10  
11  
12  
13  
14  
15  
16  
17  
18  
19  
20  
21  
22  
23  
24  
25  
26  
27  
28  
29  
30  
31  
32  
33  
34  
35  
36  
37  
38  
39  
40  
41  
42  
43  
44  
45  
46  
47  
48  
49  
50  
51  
52  
53  
54  
55  
56  
57  
58  
59  
60

485 **supplementary Figure 9.** Heterogeneity test for the total fractures.

486 **supplementary Figure 10.** Heterogeneity test for the hip fractures.

487 **supplementary Figure 11.** Heterogeneity test for the vertebral fractures.

For peer review only

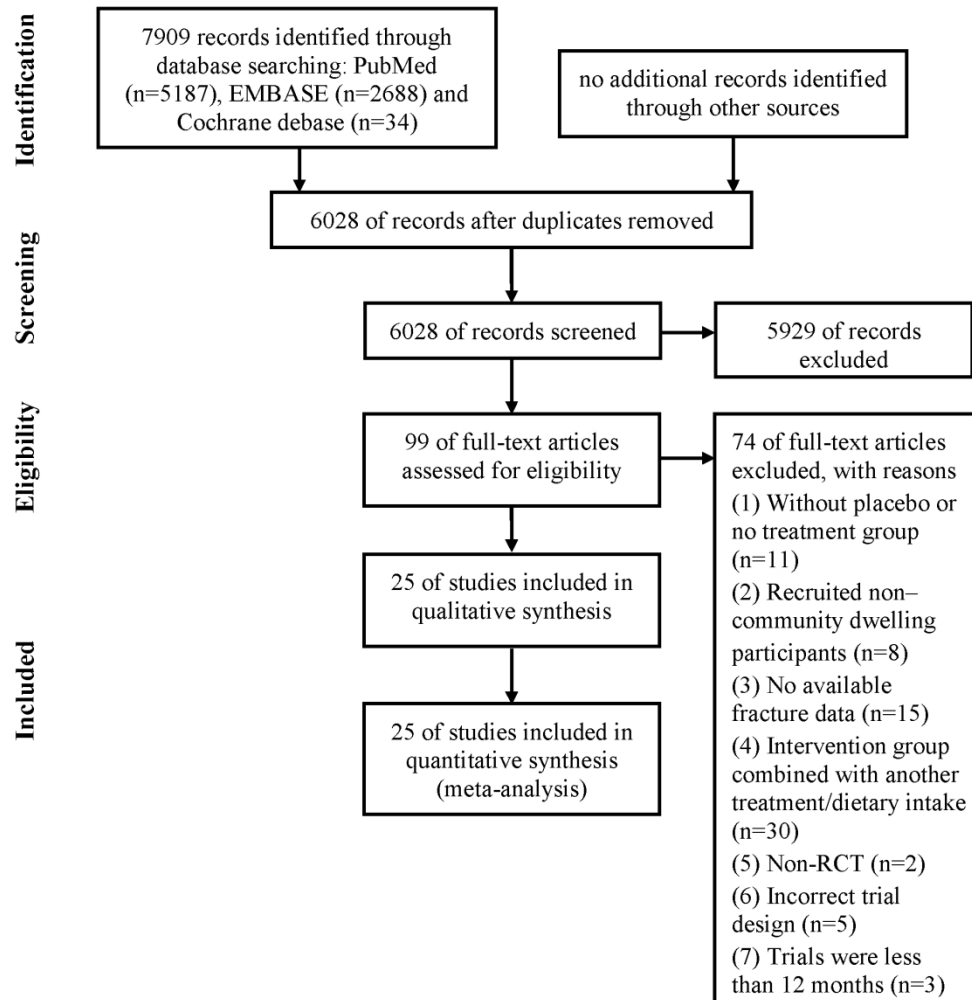

The selection of literature for included studies.

171x176mm (300 x 300 DPI)

1  
2  
3  
4  
5  
6  
7  
8  
9  
10  
11  
12  
13  
14  
15  
16  
17  
18  
19  
20  
21  
22  
23  
24  
25  
26  
27  
28  
29  
30  
31  
32  
33  
34  
35  
36  
37  
38  
39  
40  
41  
42  
43  
44  
45  
46  
47  
48  
49  
50  
51  
52  
53  
54  
55  
56  
57  
58  
59  
60



The network plot of comparisons on total fractures (A), hip fractures (B) and vertebral fractures (C). A: high calcium (800 mg/d or higher) ; B: low calcium (less than 800 mg/d) ; C: high vitamin D (800 IU/d or higher) ; D: low vitamin D (less than 800 IU/d)

272x96mm (300 x 300 DPI)



The forest plot for the risk of total fractures. A: high calcium (800 mg/d or higher) ; B: low calcium (less than 800 mg/d) ; C: high vitamin D (800 IU/d or higher) ; D: low vitamin D (less than 800 IU/d)

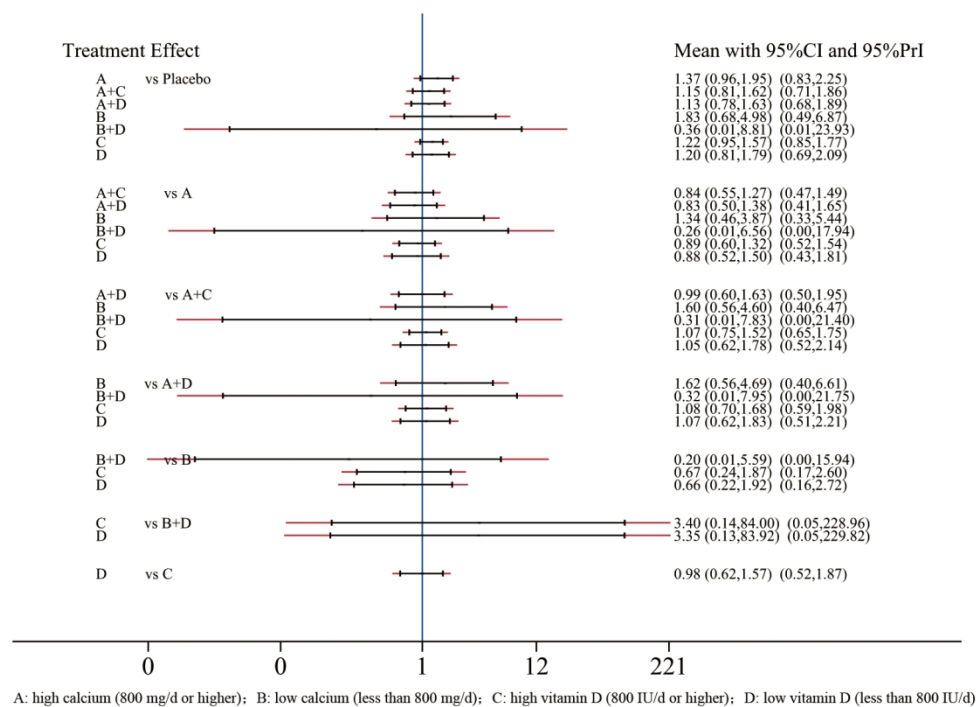

The forest plot for the risk of hip fractures. A: high calcium (800 mg/d or higher) ; B: low calcium (less than 800 mg/d) ; C: high vitamin D (800 IU/d or higher) ; D: low vitamin D (less than 800 IU/d)

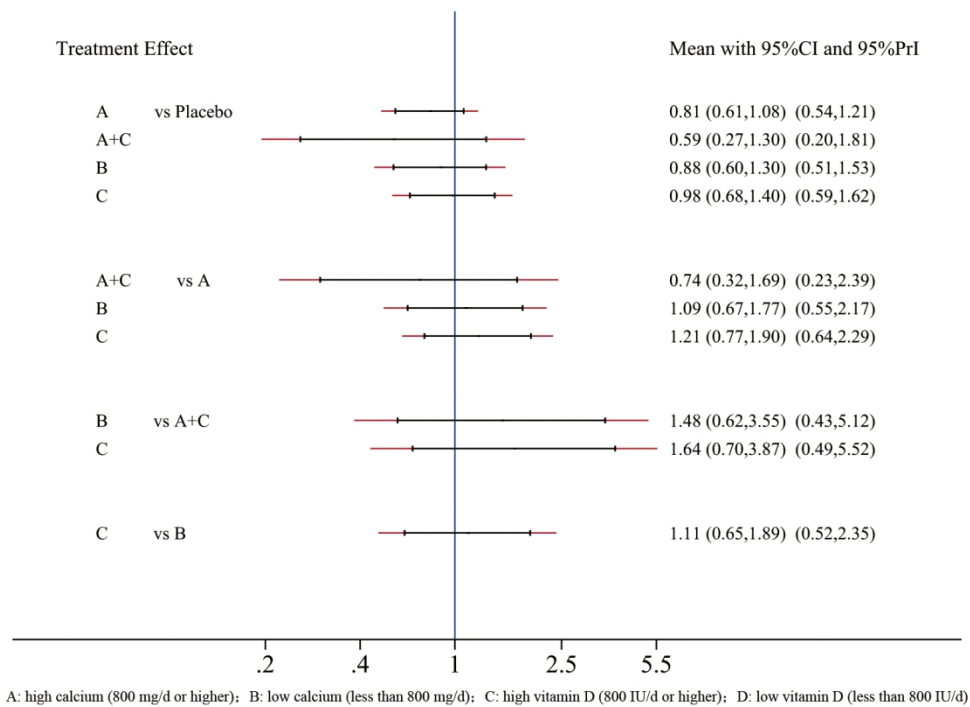

The forest plot for the risk of vertebral fractures. A: high calcium (800 mg/d or higher) ; B: low calcium (less than 800 mg/d) ; C: high vitamin D (800 IU/d or higher) ; D: low vitamin D (less than 800 IU/d)

**Supplementary eTable 1. Search Strategy for Each Database**

---

| <b>Database</b> | <b>Search strategy</b>                                                                                                                            |
|-----------------|---------------------------------------------------------------------------------------------------------------------------------------------------|
| Pubmed          | #1 "calcium"[MeSH Terms] OR "calcium"[All Fields]                                                                                                 |
|                 | #2 "vitamin d"[MeSH Terms] OR "vitamin d"[All Fields] OR<br>"ergocalciferols"[MeSH Terms] OR "ergocalciferols"[All Fields]                        |
|                 | #3 "fractures, bone"[MeSH Terms] OR ("fractures"[All Fields] AND "bone"[All<br>Fields]) OR "bone fractures"[All Fields] OR "fracture"[All Fields] |
|                 | #4 #1 or #2                                                                                                                                       |
|                 | #5 #3 and #4                                                                                                                                      |

---

Supplementary Table 1 - Checklist of items to include when reporting a systematic review or meta-analysis

1  
2  
3  
4  
5  
6  
7  
8  
9  
10  
11  
12  
13  
14  
15  
16  
17  
18  
19  
20  
21  
22  
23  
24  
25  
26  
27  
28  
29  
30  
31  
32  
33  
34  
35  
36  
37  
38  
39  
40  
41  
42  
43  
44  
45  
46  
47

| Section/topic             | # | Checklist item                                                                                                                                                                                                                                                                                              | Reported on page # |
|---------------------------|---|-------------------------------------------------------------------------------------------------------------------------------------------------------------------------------------------------------------------------------------------------------------------------------------------------------------|--------------------|
| <b>TITLE</b>              |   |                                                                                                                                                                                                                                                                                                             |                    |
| Title                     | 1 | Identify the report as a systematic review, meta-analysis, or both.                                                                                                                                                                                                                                         | 1                  |
| <b>ABSTRACT</b>           |   |                                                                                                                                                                                                                                                                                                             |                    |
| Structured summary        | 2 | Provide a structured summary including, as applicable: background; objectives; data sources; study eligibility criteria, participants, and interventions; study appraisal and synthesis methods; results; limitations; conclusions and implications of key findings; systematic review registration number. | 2                  |
| <b>INTRODUCTION</b>       |   |                                                                                                                                                                                                                                                                                                             |                    |
| Rationale                 | 3 | Describe the rationale for the review in the context of what is already known.                                                                                                                                                                                                                              | 3                  |
| Objectives                | 4 | Provide an explicit statement of questions being addressed with reference to participants, interventions, comparisons, outcomes, and study design (PICOS).                                                                                                                                                  | 4                  |
| <b>METHODS</b>            |   |                                                                                                                                                                                                                                                                                                             |                    |
| Protocol and registration | 5 | Indicate if a review protocol exists, if and where it can be accessed (e.g., Web address), and, if available, provide registration information including registration number.                                                                                                                               | 5                  |
| Eligibility criteria      | 6 | Specify study characteristics (e.g., PICOS, length of follow-up) and report characteristics (e.g., years considered, language, publication status) used as criteria for eligibility, giving rationale.                                                                                                      | 5                  |
| Information sources       | 7 | Describe all information sources (e.g., databases with dates of coverage, contact with study authors to identify additional studies) in the search and date last searched.                                                                                                                                  | 5                  |
| Search                    | 8 | Present full electronic search strategy for at least one database, including any limits used, such that it could be repeated.                                                                                                                                                                               | 5                  |



1  
2  
3  
4  
5  
6  
7  
8  
9  
10  
11  
12  
13  
14  
15  
16  
17  
18  
19  
20  
21  
22  
23  
24  
25  
26  
27  
28  
29  
30  
31  
32  
33  
34  
35  
36  
37  
38  
39  
40  
41  
42  
43  
44  
45  
46  
47

| Section/topic                      | #  | Checklist item                                                                                                                                                                                                         | Reported on page # |
|------------------------------------|----|------------------------------------------------------------------------------------------------------------------------------------------------------------------------------------------------------------------------|--------------------|
| Study selection                    | 9  | State the process for selecting studies (i.e., screening, eligibility, included in systematic review, and, if applicable, included in the meta-analysis).                                                              | 6                  |
| Data collection process            | 10 | Describe method of data extraction from reports (e.g., piloted forms, independently, in duplicate) and any processes for obtaining and confirming data from investigators.                                             | 6                  |
| Data items                         | 11 | List and define all variables for which data were sought (e.g., PICOS, funding sources) and any assumptions and simplifications made.                                                                                  | 6                  |
| Risk of bias in individual studies | 12 | Describe methods used for assessing risk of bias of individual studies (including specification of whether this was done at the study or outcome level), and how this information is to be used in any data synthesis. | 6                  |
| Summary measures                   | 13 | State the principal summary measures (e.g., risk ratio, difference in means).                                                                                                                                          | 7                  |
| Synthesis of results               | 14 | Describe the methods of handling data and combining results of studies, if done, including measures of consistency (e.g., $I^2$ ) for each meta-analysis.                                                              | 7                  |
| Risk of bias across studies        | 15 | Specify any assessment of risk of bias that may affect the cumulative evidence (e.g., publication bias, selective reporting within studies).                                                                           | 7                  |
| Additional analyses                | 16 | Describe methods of additional analyses (e.g., sensitivity or subgroup analyses, meta-regression), if done, indicating which were pre-specified.                                                                       | 7                  |
| <b>RESULTS</b>                     |    |                                                                                                                                                                                                                        |                    |
| Study selection                    | 17 | Give numbers of studies screened, assessed for eligibility, and included in the review, with reasons for exclusions at each stage, ideally with a flow diagram.                                                        | 8                  |
| Study characteristics              | 18 | For each study, present characteristics for which data were extracted (e.g., study size, PICOS, follow-up period) and provide the citations.                                                                           | 8                  |
| Risk of bias within studies        | 19 | Present data on risk of bias of each study and, if available, any outcome-level assessment (see Item 12).                                                                                                              | 8                  |
| Results of individual studies      | 20 | For all outcomes considered (benefits or harms), present, for each study: (a) simple summary data for each intervention group and (b) effect estimates and confidence intervals, ideally with a forest plot.           | 9-10               |

1  
2  
3  
4  
5  
6  
7  
8  
9  
10  
11  
12  
13  
14  
15  
16  
17  
18  
19  
20  
21  
22  
23  
24  
25  
26  
27  
28  
29  
30  
31  
32  
33  
34  
35  
36  
37  
38  
39  
40  
41  
42  
43  
44  
45  
46  
47

| Section/topic               | #  | Checklist item                                                                                                                                                                        | Reported on page # |
|-----------------------------|----|---------------------------------------------------------------------------------------------------------------------------------------------------------------------------------------|--------------------|
| Synthesis of results        | 21 | Present results of each meta-analysis done, including confidence intervals and measures of consistency.                                                                               | 9-10               |
| Risk of bias across studies | 22 | Present results of any assessment of risk of bias across studies (see Item 15).                                                                                                       | 8                  |
| Additional analysis         | 23 | Give results of additional analyses, if done (e.g., sensitivity or subgroup analyses, meta-regression [see Item 16]).                                                                 | 8-10               |
| <b>DISCUSSION</b>           |    |                                                                                                                                                                                       |                    |
| Summary of evidence         | 24 | Summarize the main findings including the strength of evidence for each main outcome; consider their relevance to key groups (e.g., health care providers, users, and policy makers). | 10-12              |
| Limitations                 | 25 | Discuss limitations at study and outcome level (e.g., risk of bias), and at review level (e.g., incomplete retrieval of identified research, reporting bias).                         | 12                 |
| Conclusions                 | 26 | Provide a general interpretation of the results in the context of other evidence, and implications for future research.                                                               | 13                 |
| <b>FUNDING</b>              |    |                                                                                                                                                                                       |                    |
| Funding                     | 27 | Describe sources of funding for the systematic review and other support (e.g., supply of data); role of funders for the systematic review.                                            | 13                 |

| Source                                       | Intervention                                                                                                                                   | Women, No. (%)       | Mean Age, y     | Previous Fracture    | Calcium Intake, mg/d | Baseline 25OHD, ng/mL | Treatment Duration |
|----------------------------------------------|------------------------------------------------------------------------------------------------------------------------------------------------|----------------------|-----------------|----------------------|----------------------|-----------------------|--------------------|
| Avenell et al, 2004<br>(United Kingdom)      | Calcium(1 g/d) (n = 29)<br>No treatment (n = 35)                                                                                               | NA <sup>a</sup> (83) | 78 <sup>b</sup> | Yes                  | NA                   | NA                    | 3.8 y              |
|                                              | D <sub>3</sub> ( 800IU/d) (n = 35)<br>No treatment (n = 35)                                                                                    | NA <sup>a</sup> (83) | 78 <sup>b</sup> | Yes                  | NA                   | NA                    | 3.8 y              |
|                                              | Calcium (1g/d) + D <sub>3</sub><br>(800IU/d) (n = 35)<br>No treatment (n = 35)                                                                 | NA <sup>a</sup> (83) | 78 <sup>b</sup> | Yes                  | NA                   | NA                    | 3.8 y              |
| Baron et al, 1999<br>(United States)         | Calcium: 1.2 g/d (n = 464)<br>Placebo (n = 466)                                                                                                | 258 (28)             | 61.0            | NA                   | 877                  | NA                    | 4 y                |
| Dawson-Hughes et al,<br>1997 (United States) | Calcium (0.5g/d) + D <sub>3</sub><br>(700IU/d) (n = 187)<br>Placebo (n = 202)                                                                  | 213 (54)             | 71.1            | NA                   | 729                  | 29.6 <sup>e</sup>     | 3 y                |
| Grant et al, 2005<br>(United Kingdom)        | Calcium(1 g/d) (n = 1311)<br>Placebo (n = 1332)                                                                                                | 2241 (85)            | 77              | Yes                  | NA                   | 15.2 <sup>e,f</sup>   | 2-5 y              |
|                                              | D <sub>3</sub> ( 800IU/d) (n = 1343)<br>Placebo (n = 1332)                                                                                     | 2264 (85)            | 77              | Yes                  | NA                   | 15.2 <sup>e,f</sup>   | 2-5 y              |
|                                              | Calcium (1g/d) + D <sub>3</sub><br>(800IU/d) (n = 1306)<br>Placebo (n = 1332)                                                                  | 2232 (85)            | 77.5            | Yes                  | NA                   | 15.2 <sup>e,f</sup>   | 2-5 y              |
| Hansson and Roos,<br>1987 (Sweden)           | Calcium (1g/d) (n = 25)<br>Placebo (n = 25)                                                                                                    | 50 (100)             | 65.9            | Yes                  | NA                   | NA                    | 3 y                |
| Harwood et al, 2004<br>(United Kingdom)      | D <sub>3</sub> (300000 IU once) (n = 38)<br>No treatment (n = 37)                                                                              | 75 (100)             | 80.5            | Yes                  | NA                   | 11.6                  | 1 y                |
|                                              | Calcium (1g/d) + D <sub>2</sub><br>(300000 IU once) (n = 36)<br>Calcium (1g/d) + D <sub>3</sub><br>(800IU/d) (n = 39)<br>No treatment (n = 37) | 112 (100)            | 81.7            | Yes                  | NA                   | 11.9                  | 1 y                |
| Hin et al, 2017<br>(United Kingdom)          | D <sub>3</sub> (4000 IU/d)(n = 102)<br>D <sub>3</sub> (2000 IU/d)(n = 102)<br>Placebo (n = 101)                                                | 150 (49)             | 71.7            | Partial <sup>c</sup> | 710                  | 20.1                  | 1 y                |
| Jackson et al, 2006<br>(United States)       | Calcium (1g/d) + D <sub>3</sub> (400<br>IU/d) (n = 4015)                                                                                       | 7972 (100)           | 62.4            | Partial <sup>c</sup> | 1151                 | 18.9 <sup>e</sup>     | 7 y                |

|    |                       |                                        |            |      |                      |      |                   |
|----|-----------------------|----------------------------------------|------------|------|----------------------|------|-------------------|
| 1  |                       |                                        |            |      |                      |      |                   |
| 2  |                       |                                        |            |      |                      |      |                   |
| 3  |                       | Placebo (n = 3957)                     |            |      |                      |      |                   |
| 4  |                       |                                        |            |      |                      |      |                   |
| 5  | Lips et al, 1996      | 400 IU/d (n = 1291)                    | 1916 (74)  | 80.0 | No hip fracture      | 868  | 10.6 <sup>e</sup> |
| 6  |                       |                                        |            |      |                      |      | 3-4 y             |
| 7  | The Netherlands)      | Placebo (n = 1287)                     |            |      |                      |      |                   |
| 8  |                       |                                        |            |      |                      |      |                   |
| 9  | Liu et al, 2015       | Calcium (1.5g/d) + D <sub>3</sub> (600 | 98 (100)   | 62.1 | No                   | 1500 | NA                |
| 10 | China)                | IU/d) (n = 50)                         |            |      |                      |      | 1 y               |
| 11 |                       | Placebo (n = 48)                       |            |      |                      |      |                   |
| 12 |                       |                                        |            |      |                      |      |                   |
| 13 | Mitri et al, 2011     | D <sub>3</sub> (2000 IU/d)(n = 23)     | 25 (53)    | 58.0 | NA                   | 926  | 25.3              |
| 14 |                       |                                        |            |      |                      |      | 4 mo              |
| 15 | United States)        | Placebo (n = 24)                       |            |      |                      |      |                   |
| 16 |                       |                                        |            |      |                      |      |                   |
| 17 | Peacock et al, 2000   | Calcium (0.75g/d) (n = 126)            | 187 (72)   | 73.8 | Partial <sup>c</sup> | 597  | 25.0              |
| 18 |                       |                                        |            |      |                      |      | 4 y               |
| 19 | United States)        | Placebo (n = 135)                      |            |      |                      |      |                   |
| 20 |                       |                                        |            |      |                      |      |                   |
| 21 | Porthouse et al, 2005 | Calcium (1g/d) + D <sub>3</sub> (800   | 3314 (100) | 76.8 | Partial <sup>c</sup> | 1080 | NA                |
| 22 |                       |                                        |            |      |                      |      | 1.5-3.5 y         |
| 23 | United Kingdom)       | IU/d) (n = 1321)                       |            |      |                      |      |                   |
| 24 |                       | No treatment (n = 1993)                |            |      |                      |      |                   |
| 25 |                       |                                        |            |      |                      |      |                   |
| 26 | Pince et al, 2006     | Calcium (0.48g/d) (n = 730)            | 1460 (100) | 75.2 | Partial <sup>c</sup> | 915  | 31.0 <sup>e</sup> |
| 27 |                       |                                        |            |      |                      |      | 5 y               |
| 28 | Australia)            | Placebo (n = 730)                      |            |      |                      |      |                   |
| 29 |                       |                                        |            |      |                      |      |                   |
| 30 | Recker et al, 1996    | Calcium (1.2 g/d) (n = 95)             | 197 (100)  | 73.5 | Partial <sup>c</sup> | 434  | 25.5 <sup>e</sup> |
| 31 |                       |                                        |            |      |                      |      | 4 y               |
| 32 | United States)        | Placebo (n = 102)                      |            |      |                      |      |                   |
| 33 |                       |                                        |            |      |                      |      |                   |
| 34 | Reid et al, 1993      | Calcium (1 g/d) (n = 68)               | 135 (100)  | 58   | No vertebral         | 750  | 37.5              |
| 35 |                       |                                        |            |      |                      |      | 4 y               |
| 36 | New Zealand)          | Placebo (n = 67)                       |            |      | fracture             |      |                   |
| 37 |                       |                                        |            |      |                      |      |                   |
| 38 | Reid et al, 2006      | Calcium (1 g/d) (n = 732)              | 1471 (100) | 74.3 | Partial <sup>c</sup> | 857  | 20.7              |
| 39 |                       |                                        |            |      |                      |      | 5 y               |
| 40 | New Zealand)          | Placebo (n = 739)                      |            |      |                      |      |                   |
| 41 |                       |                                        |            |      |                      |      |                   |
| 42 | Higgs et al, 1998     | Calcium (1.6 g/d) (n = 119)            | 236 (100)  | 66.2 | No                   | 714  | 30.1              |
| 43 |                       |                                        |            |      |                      |      | 4 y               |
| 44 | United States)        | Placebo (n = 117)                      |            |      |                      |      |                   |
| 45 |                       |                                        |            |      |                      |      |                   |
| 46 |                       |                                        |            |      |                      |      |                   |
| 47 |                       |                                        |            |      |                      |      |                   |
| 48 |                       |                                        |            |      |                      |      |                   |
| 49 |                       |                                        |            |      |                      |      |                   |
| 50 |                       |                                        |            |      |                      |      |                   |
| 51 |                       |                                        |            |      |                      |      |                   |
| 52 |                       |                                        |            |      |                      |      |                   |
| 53 |                       |                                        |            |      |                      |      |                   |
| 54 |                       |                                        |            |      |                      |      |                   |
| 55 |                       |                                        |            |      |                      |      |                   |
| 56 |                       |                                        |            |      |                      |      |                   |
| 57 |                       |                                        |            |      |                      |      |                   |
| 58 |                       |                                        |            |      |                      |      |                   |
| 59 |                       |                                        |            |      |                      |      |                   |
| 60 |                       |                                        |            |      |                      |      |                   |

1  
2  
3  
4  
5  
6  
7  
8  
9  
10  
11  
12  
13  
14  
15  
16  
17  
18  
19  
20  
21  
22  
23  
24  
25  
26  
27  
28  
29  
30  
31  
32  
33  
34  
35  
36  
37  
38  
39  
40  
41  
42  
43  
44  
45  
46  
47  
48  
49  
50  
51  
52  
53  
54  
55  
56  
57  
58  
59  
60

|                                        |                                                        |           |      |                      |      |      |     |  |
|----------------------------------------|--------------------------------------------------------|-----------|------|----------------------|------|------|-----|--|
| (Finland)                              | Placebo (n = 102)                                      |           |      |                      |      |      |     |  |
| Witham et al, 2013<br>(United Kingdom) | D <sub>3</sub> (100000 IU every 3 mo)<br>(n = 80)      | 77 (49)   | 76.8 | NA                   | 1125 | 18.0 | 1 y |  |
|                                        | Placebo (n = 79)                                       |           |      |                      |      |      |     |  |
| Xue et al, 2017<br>(China)             | Calcium (0.6g/d) + D <sub>3</sub> (800 IU/d) (n = 139) | 312 (100) | 63.6 | Partial <sup>e</sup> | NA   | 30.8 | 1 y |  |
|                                        | Placebo (n = 173)                                      |           |      |                      |      |      |     |  |

Abbreviation: 25OHD, 25-hydroxyvitamin D; NA, not available

<sup>a</sup> Women accounted for 83% of total participants in this trial, but detailed data not available for each group.

<sup>b</sup> Mean age is 78 y for total participants in this trial, but detailed data not available for each group.

<sup>c</sup> This trial reported partial participants with fracture history.

<sup>d</sup> Partial participants were assessed for dietary calcium intake.

<sup>e</sup> Partial participants received measurement of baseline 25OHD concentrations.

<sup>f</sup> The RECORD trial reported that the mean baseline 25OHD concentrations for a sample of 60 participants was 15.2 ng/mL, but detailed data were not available for each group.

**supplementary Table 2.** The characteristics of the included studies.

| Source                                              | Treatment |                                                              | No. of Participants |              |                    |
|-----------------------------------------------------|-----------|--------------------------------------------------------------|---------------------|--------------|--------------------|
|                                                     | Duration  | Intervention                                                 | Total Fracture      | Hip fracture | Vertebral Fracture |
| <b>Avenell et al, 2004</b><br>(United Kingdom)      | 3.8 y     | Calcium(1 g/d) (n = 29)                                      | 4                   | 1            | 0                  |
|                                                     |           | D <sub>3</sub> ( 800IU/d) (n = 35)                           | 3                   | 0            | 0                  |
|                                                     |           | Calcium (1g/d) + D <sub>3</sub><br>(800IU/d) (n = 35)        | 2                   | 1            | 0                  |
|                                                     |           | No treatment (n = 35)                                        | 4                   | 1            | 1                  |
| <b>Baron et al, 1999</b><br>(United States)         | 4 y       | Calcium: 1.2 g/d (n = 464)                                   | 4                   | 1            |                    |
|                                                     |           | Placebo (n = 466)                                            | 14                  | 0            |                    |
| <b>Dawson-Hughes et al, 1997</b><br>(United States) | 3 y       | Calcium (0.5g/d) + D <sub>3</sub><br>(700IU/d) (n = 187)     |                     | 0            |                    |
|                                                     |           | Placebo (n = 202)                                            |                     | 1            |                    |
| <b>Grant et al, 2005</b><br>(United Kingdom)        | 2-5 y     | Calcium(1 g/d) (n = 1311)                                    | 166                 | 49           | 3                  |
|                                                     |           | D <sub>3</sub> ( 800IU/d) (n = 1343)                         | 188                 | 47           | 4                  |
|                                                     |           | Calcium (1g/d) + D <sub>3</sub><br>(800IU/d) (n = 1306)      | 165                 | 46           | 0                  |
|                                                     |           | Placebo (n = 1332)                                           | 179                 | 41           | 1                  |
| <b>Hansson and Roos, 1987</b><br>(Sweden)           | 3 y       | Calcium (1g/d) (n = 25)                                      |                     |              | 1                  |
|                                                     |           | Placebo (n = 25)                                             |                     |              | 1                  |
| <b>Harwood et al, 2004</b><br>(United Kingdom)      | 1 y       | D <sub>3</sub> (300000 IU once) (n = 38)                     | 0                   | 0            |                    |
|                                                     |           | Calcium (1g/d) + D <sub>2</sub><br>(300000 IU once) (n = 36) | 6                   | 1            |                    |
|                                                     |           | Calcium (1g/d) + D <sub>3</sub><br>(800IU/d) (n = 39)        |                     |              |                    |
|                                                     |           | No treatment (n = 37)                                        | 5                   | 1            |                    |
| <b>Hin et al, 2017</b><br>(United Kingdom)          | 1 y       | D <sub>3</sub> (4000 IU/d)(n = 102)                          | 6                   |              |                    |
|                                                     |           | D <sub>3</sub> (2000 IU/d)(n = 102)                          |                     |              |                    |
|                                                     |           | Placebo (n = 101)                                            | 1                   |              |                    |
| <b>Jackson et al, 2006</b><br>(United States)       | 7 y       | Calcium (1g/d) + D <sub>3</sub> (400<br>IU/d) (n = 4015)     |                     | 70           |                    |
|                                                     |           | Placebo (n = 3957)                                           |                     | 61           |                    |

|                              |           |                                                       |     |    |    |
|------------------------------|-----------|-------------------------------------------------------|-----|----|----|
| <b>Lips et al, 1996</b>      | 3-4 y     | 400 IU/d (n = 1291)                                   | 135 | 58 |    |
| <b>(The Netherlands)</b>     |           | Placebo (n = 1287)                                    | 122 | 48 |    |
| <b>Liu et al, 2015</b>       | 1 y       | Calcium (1.5g/d) + D <sub>3</sub> (600 IU/d) (n = 50) | 1   |    |    |
| <b>(China)</b>               |           | Placebo (n = 48)                                      | 2   |    |    |
| <b>Mitri et al, 2011</b>     | 4 mo      | D <sub>3</sub> (2000 IU/d)(n = 23)                    | 1   |    |    |
| <b>(United States)</b>       |           | Placebo (n = 24)                                      | 0   |    |    |
| <b>Peacock et al, 2000</b>   | 4 y       | Calcium (0.75g/d) (n = 126)                           |     |    | 7  |
| <b>(United States)</b>       |           | Placebo (n = 135)                                     |     |    | 13 |
| <b>Porthouse et al, 2005</b> | 1.5-3.5 y | Calcium (1g/d) + D <sub>3</sub> (800 IU/d) (n = 1321) | 58  | 8  |    |
| <b>(United Kingdom)</b>      |           | No treatment (n = 1993)                               | 91  | 17 |    |
| <b>Prince et al, 2006</b>    | 5 y       | Calcium (0.48g/d) (n = 730)                           | 110 | 11 | 38 |
| <b>(Australia)</b>           |           | Placebo (n = 730)                                     | 126 | 6  | 39 |
| <b>Recker et al, 1996</b>    | 4 y       | Calcium (1.2 g/d) (n = 95)                            |     |    | 27 |
| <b>(United States)</b>       |           | Placebo (n = 102)                                     |     |    | 34 |
| <b>Reid et al, 1993</b>      | 4 y       | Calcium (1 g/d) (n = 68)                              | 2   | 0  | 0  |
| <b>(New Zealand)</b>         |           | Placebo (n = 67)                                      | 7   | 2  | 1  |
| <b>Reid et al, 2006</b>      | 5 y       | Calcium (1 g/d) (n = 732)                             | 134 | 17 | 27 |
| <b>(New Zealand)</b>         |           | Placebo (n = 739)                                     | 147 | 5  | 38 |
| <b>Riggs et al, 1998</b>     | 4 y       | Calcium (1.6 g/d) (n = 119)                           |     |    | 8  |
| <b>(United States)</b>       |           | Placebo (n = 117)                                     |     |    | 9  |
| <b>Salovaara et al, 2010</b> | 3 y       | Calcium(1g/d) + D <sub>3</sub> (800 IU/d) (n = 1718)  | 78  | 4  | 9  |
| <b>(Finland)</b>             |           | No treatment (n = 1714)                               | 94  | 2  | 13 |
| <b>Sanders et al, 2010</b>   | 3-5 y     | D <sub>3</sub> (500000 IU every year) (n = 1131)      | 155 | 19 | 35 |
| <b>(Australia)</b>           |           | Placebo (n = 1127)                                    | 125 | 15 | 28 |
| <b>Smith et al, 2007</b>     | 3 y       | D <sub>3</sub> (300000 IU every year) (n = 4727)      |     | 66 |    |
| <b>(United Kingdom)</b>      |           | Placebo (n = 4713)                                    |     | 44 |    |
| <b>Trivedi et al, 2003</b>   | 5 y       | D <sub>3</sub> (100000 IU every 4 mo) (n = 1345)      | 119 | 21 | 18 |
| <b>(United Kingdom)</b>      |           | Placebo (n = 1341)                                    | 149 | 24 | 28 |

|                              |     |                                        |   |   |
|------------------------------|-----|----------------------------------------|---|---|
| <b>Uusi-Rasi et al, 2015</b> | 2 y | D <sub>3</sub> (800 IU/d) (n = 102)    | 6 | 2 |
| <b>(Finland)</b>             |     | Placebo (n = 102)                      | 6 | 0 |
| <b>Witham et al, 2013</b>    | 1 y | D <sub>3</sub> (100000 IU every 3 mo)  | 2 |   |
| <b>(United Kingdom)</b>      |     | (n = 80)                               |   |   |
|                              |     | Placebo (n = 79)                       | 3 |   |
| <b>Xue et al, 2017</b>       | 1 y | Calcium (0.6g/d) + D <sub>3</sub> (800 | 3 |   |
| <b>(China)</b>               |     | IU/d) (n = 139)                        |   |   |
|                              |     | Placebo (n = 173)                      | 2 |   |

**Supplementary Table 3.** The detailed data of outcomes



1  
2  
3  
4  
5  
6  
7  
8  
9  
10  
11  
12  
13  
14  
15  
16  
17  
18  
19  
20  
21  
22  
23  
24  
25  
26  
27  
28  
29  
30  
31  
32  
33  
34  
35  
36  
37  
38  
39  
40  
41  
42  
43  
44  
45  
46  
47  
48  
49  
50  
51  
52  
53  
54  
55  
56  
57  
58  
59  
60



1  
2  
3  
4  
5  
6  
7  
8  
9  
10  
11  
12  
13  
14  
15  
16  
17  
18  
19  
20  
21  
22  
23  
24  
25  
26  
27  
28  
29  
30  
31  
32  
33  
34  
35  
36  
37  
38  
39  
40  
41  
42  
43  
44  
45  
46  
47  
48  
49  
50  
51  
52  
53  
54  
55  
56  
57  
58  
59  
60

|                           | Random sequence generation (selection bias) | Allocation concealment (selection bias) | Blinding of participants and personnel (performance bias) | Blinding of outcome assessment (detection bias) | Incomplete outcome data (attrition bias) | Selective reporting (reporting bias) | Other bias |
|---------------------------|---------------------------------------------|-----------------------------------------|-----------------------------------------------------------|-------------------------------------------------|------------------------------------------|--------------------------------------|------------|
| Avenell et al, 2004       | +                                           | +                                       | ?                                                         | +                                               | +                                        | ?                                    | ?          |
| Baron et al, 1999         | +                                           | ?                                       | +                                                         | +                                               | +                                        | ?                                    | +          |
| Dawson-Hughes et al, 1997 | ?                                           | ?                                       | +                                                         | +                                               | ?                                        | ?                                    | ?          |
| Grant et al, 2005         | +                                           | +                                       | ?                                                         | +                                               | ?                                        | +                                    | +          |
| Hansson and Roos, 1987    | ?                                           | ?                                       | ?                                                         | ?                                               | ?                                        | ?                                    | ?          |
| Harwood et al, 2004       | +                                           | +                                       | +                                                         | +                                               | +                                        | ?                                    | ?          |
| Hin et al, 2017           | +                                           | ?                                       | +                                                         | +                                               | +                                        | +                                    | +          |
| Jackson et al, 2006       | ?                                           | ?                                       | +                                                         | +                                               | +                                        | ?                                    | +          |
| Lips et al, 1996          | +                                           | +                                       | +                                                         | ?                                               | +                                        | ?                                    | +          |
| Liu et al, 2015           | ?                                           | ?                                       | +                                                         | ?                                               | +                                        | ?                                    | +          |
| Mitri et al, 2011         | +                                           | ?                                       | +                                                         | ?                                               | +                                        | ?                                    | +          |
| Peacock et al, 2000       | ?                                           | ?                                       | +                                                         | ?                                               | +                                        | ?                                    | ?          |
| Porthouse et al, 2005     | ?                                           | +                                       | +                                                         | +                                               | +                                        | ?                                    | +          |
| Prince et al, 2006        | +                                           | +                                       | +                                                         | ?                                               | +                                        | ?                                    | +          |
| Recker et al, 1996        | ?                                           | ?                                       | +                                                         | +                                               | +                                        | ?                                    | ?          |
| Reid et al, 1993          | ?                                           | ?                                       | +                                                         | ?                                               | ?                                        | ?                                    | +          |
| Reid et al, 2006          | ?                                           | +                                       | +                                                         | ?                                               | ?                                        | ?                                    | +          |
| Riggs et al, 1998         | ?                                           | ?                                       | +                                                         | ?                                               | +                                        | ?                                    | ?          |
| Salovaara et al, 2010     | +                                           | ?                                       | +                                                         | ?                                               | +                                        | ?                                    | ?          |
| Sanders et al, 2010       | +                                           | +                                       | +                                                         | +                                               | +                                        | ?                                    | +          |
| Smith et al, 2007         | ?                                           | +                                       | +                                                         | +                                               | +                                        | ?                                    | +          |
| Trivedi et al, 2003       | ?                                           | +                                       | +                                                         | +                                               | +                                        | ?                                    | +          |
| Uusi-Rasi et al, 2015     | +                                           | ?                                       | +                                                         | ?                                               | +                                        | +                                    | +          |
| Witham et al, 2013        | +                                           | +                                       | +                                                         | +                                               | ?                                        | +                                    | +          |
| Xue et al, 2017           | +                                           | ?                                       | ?                                                         | ?                                               | +                                        | ?                                    | ?          |

1  
2  
3  
4  
5  
6  
7  
8  
9  
10  
11  
12  
13  
14  
15  
16  
17  
18  
19  
20  
21  
22  
23  
24  
25  
26  
27  
28  
29  
30  
31  
32  
33  
34  
35  
36  
37  
38  
39  
40  
41  
42  
43  
44  
45  
46  
47  
48  
49  
50  
51  
52  
53  
54  
55  
56  
57  
58  
59  
60



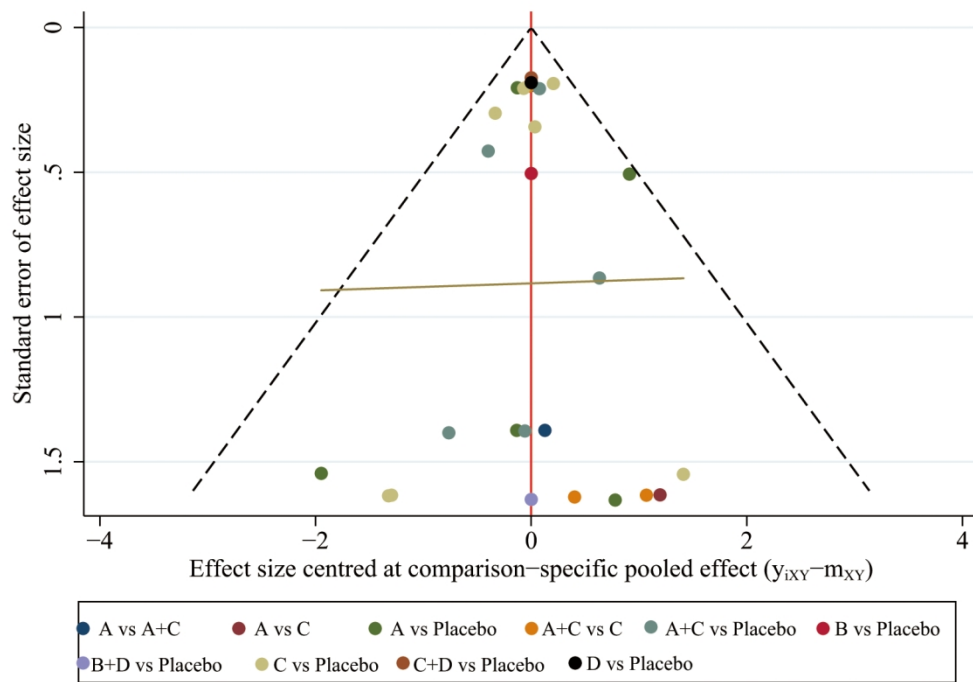

1  
2  
3  
4  
5  
6  
7  
8  
9  
10  
11  
12  
13  
14  
15  
16  
17  
18  
19  
20  
21  
22  
23  
24  
25  
26  
27  
28  
29  
30  
31  
32  
33  
34  
35  
36  
37  
38  
39  
40  
41  
42  
43  
44  
45  
46  
47  
48  
49  
50  
51  
52  
53  
54  
55  
56  
57  
58  
59  
60



1  
2  
3  
4  
5  
6  
7  
8  
9  
10  
11  
12  
13  
14  
15  
16  
17  
18  
19  
20  
21  
22  
23  
24  
25  
26  
27  
28  
29  
30  
31  
32  
33  
34  
35  
36  
37  
38  
39  
40  
41  
42  
43  
44  
45  
46  
47  
48  
49  
50  
51  
52  
53  
54  
55  
56  
57  
58  
59  
60



1  
2  
3  
4  
5  
6  
7  
8  
9  
10  
11  
12  
13  
14  
15  
16  
17  
18  
19  
20  
21  
22  
23  
24  
25  
26  
27  
28  
29  
30  
31  
32  
33  
34  
35  
36  
37  
38  
39  
40  
41  
42  
43  
44  
45  
46  
47  
48  
49  
50  
51  
52  
53  
54  
55  
56  
57  
58  
59  
60



1  
2  
3  
4  
5  
6  
7  
8  
9  
10  
11  
12  
13  
14  
15  
16  
17  
18  
19  
20  
21  
22  
23  
24  
25  
26  
27  
28  
29  
30  
31  
32  
33  
34  
35  
36  
37  
38  
39  
40  
41  
42  
43  
44  
45  
46  
47  
48  
49  
50  
51  
52  
53  
54  
55  
56  
57  
58  
59  
60

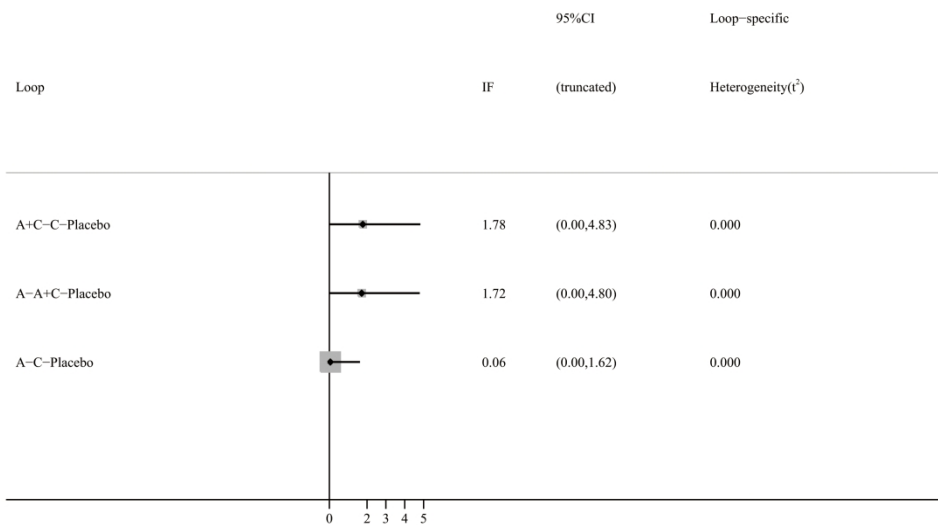

\*\*\* Loop(s) [A-A+C-C] are formed only by multi-arm trial(s) – Consistent by definition



1  
2  
3  
4  
5  
6  
7  
8  
9  
10  
11  
12  
13  
14  
15  
16  
17  
18  
19  
20  
21  
22  
23  
24  
25  
26  
27  
28  
29  
30  
31  
32  
33  
34  
35  
36  
37  
38  
39  
40  
41  
42  
43  
44  
45  
46  
47  
48  
49  
50  
51  
52  
53  
54  
55  
56  
57  
58  
59  
60





1  
2  
3  
4  
5  
6  
7  
8  
9  
10  
11  
12  
13  
14  
15  
16  
17  
18  
19  
20  
21  
22  
23  
24  
25  
26  
27  
28  
29  
30  
31  
32  
33  
34  
35  
36  
37  
38  
39  
40  
41  
42  
43  
44  
45  
46  
47  
48  
49  
50  
51  
52  
53  
54  
55  
56  
57  
58  
59  
60



# BMJ Open

## Comparison of fracture risk using different supplemental doses of vitamin D, calcium or their combination: a network meta-analysis of randomized controlled trials

|                               |                                                                                                                                                                                                                                                                                                                                                                                                                                                                                                                                                                                                                                                                                                                                                                                                                                                                                                                                                                                                                                                                                                                                                                                                                                                                                                                                                                                                                                                                                                                                                                                                                                                                                                                                                                                                                                                                                                                                                                                                                                                                                                                                                                                                                                                                                                                        |
|-------------------------------|------------------------------------------------------------------------------------------------------------------------------------------------------------------------------------------------------------------------------------------------------------------------------------------------------------------------------------------------------------------------------------------------------------------------------------------------------------------------------------------------------------------------------------------------------------------------------------------------------------------------------------------------------------------------------------------------------------------------------------------------------------------------------------------------------------------------------------------------------------------------------------------------------------------------------------------------------------------------------------------------------------------------------------------------------------------------------------------------------------------------------------------------------------------------------------------------------------------------------------------------------------------------------------------------------------------------------------------------------------------------------------------------------------------------------------------------------------------------------------------------------------------------------------------------------------------------------------------------------------------------------------------------------------------------------------------------------------------------------------------------------------------------------------------------------------------------------------------------------------------------------------------------------------------------------------------------------------------------------------------------------------------------------------------------------------------------------------------------------------------------------------------------------------------------------------------------------------------------------------------------------------------------------------------------------------------------|
| Journal:                      | <i>BMJ Open</i>                                                                                                                                                                                                                                                                                                                                                                                                                                                                                                                                                                                                                                                                                                                                                                                                                                                                                                                                                                                                                                                                                                                                                                                                                                                                                                                                                                                                                                                                                                                                                                                                                                                                                                                                                                                                                                                                                                                                                                                                                                                                                                                                                                                                                                                                                                        |
| Manuscript ID                 | bmjopen-2018-024595.R3                                                                                                                                                                                                                                                                                                                                                                                                                                                                                                                                                                                                                                                                                                                                                                                                                                                                                                                                                                                                                                                                                                                                                                                                                                                                                                                                                                                                                                                                                                                                                                                                                                                                                                                                                                                                                                                                                                                                                                                                                                                                                                                                                                                                                                                                                                 |
| Article Type:                 | Original research                                                                                                                                                                                                                                                                                                                                                                                                                                                                                                                                                                                                                                                                                                                                                                                                                                                                                                                                                                                                                                                                                                                                                                                                                                                                                                                                                                                                                                                                                                                                                                                                                                                                                                                                                                                                                                                                                                                                                                                                                                                                                                                                                                                                                                                                                                      |
| Date Submitted by the Author: | 09-Sep-2019                                                                                                                                                                                                                                                                                                                                                                                                                                                                                                                                                                                                                                                                                                                                                                                                                                                                                                                                                                                                                                                                                                                                                                                                                                                                                                                                                                                                                                                                                                                                                                                                                                                                                                                                                                                                                                                                                                                                                                                                                                                                                                                                                                                                                                                                                                            |
| Complete List of Authors:     | <p>Hu, Zhi-Chao; The Second Affiliated Hospital and Yuying Children's Hospital of Wenzhou Medical University, Second Medical School of Wenzhou Medical University, Wenzhou, Zhejiang, China, Department of Orthopedics</p> <p>Tang, Qian; The Second Affiliated Hospital and Yuying Children's Hospital of Wenzhou Medical University, Second Medical School of Wenzhou Medical University, Wenzhou, Zhejiang, China, Department of Orthopedics</p> <p>Sang , Chang-Min ; Department of Orthopaedics, The Affiliated Hospital of Jiujiang Medical College, Jiujiang, Jiangxi, 332000, China., Department of Orthopaedics</p> <p>Tang, Li; The Second Affiliated Hospital and Yuying Children's Hospital of Wenzhou Medical University, Second Medical School of Wenzhou Medical University, Wenzhou, Zhejiang, China, Department of Orthopedics</p> <p>Li, Xiaobin; The Second Affiliated Hospital and Yuying Children's Hospital of Wenzhou Medical University</p> <p>Zheng, Gang; The Second Affiliated Hospital and Yuying Children's Hospital of Wenzhou Medical University, Second Medical School of Wenzhou Medical University, Wenzhou, Zhejiang, China, Department of Orthopedics</p> <p>Feng, Zhen-Hua; The Second Affiliated Hospital and Yuying Children's Hospital of Wenzhou Medical University, Second Medical School of Wenzhou Medical University, Wenzhou, Zhejiang, China, Department of Orthopedics</p> <p>Xuan, Jiang-Wei; The Second Affiliated Hospital and Yuying Children's Hospital of Wenzhou Medical University, Second Medical School of Wenzhou Medical University, Wenzhou, Zhejiang, China, Department of Orthopedics</p> <p>Shen, Zhi-Hao; Department of Orthopaedics, The Second Affiliated Hospital and Yuying Children's Hospital of Wenzhou Medical University, Wenzhou, Zhejiang, 325027, China.; Hainan Medical College, Haikou, Hainan, China.</p> <p>Shen, Li-Yan; The Second Affiliated Hospital and Yuying Children's Hospital of Wenzhou Medical University, Second Medical School of Wenzhou Medical University, Wenzhou, Zhejiang, China, Department of Orthopedics</p> <p>ni, wenfei; The Second Affiliated Hospital and Yuying Children's Hospital of Wenzhou Medical University, Second Medical College of Wenzhou Medical University, Department of Orthopaedics;</p> |

1  
2  
3  
4  
5  
6  
7  
8  
9  
10  
11  
12  
13  
14  
15  
16  
17  
18  
19  
20  
21  
22  
23  
24  
25  
26  
27  
28  
29  
30  
31  
32  
33  
34  
35  
36  
37  
38  
39  
40  
41  
42  
43  
44  
45  
46  
47  
48  
49  
50  
51  
52  
53  
54  
55  
56  
57  
58  
59  
60

|                                  |                                                                                                                                                                                                                   |
|----------------------------------|-------------------------------------------------------------------------------------------------------------------------------------------------------------------------------------------------------------------|
|                                  | Wu, Ai-Min; The Second Affiliated Hospital and Yuying Children’s Hospital of Wenzhou Medical University, Second Medical School of Wenzhou Medical University, Wenzhou, Zhejiang, China, Department of Orthopedics |
| <b>Primary Subject Heading</b> : | Nutrition and metabolism                                                                                                                                                                                          |
| Secondary Subject Heading:       | Diabetes and endocrinology, Nutrition and metabolism                                                                                                                                                              |
| Keywords:                        | Calcium, Vitamin D, Fractures, network meta-analysis                                                                                                                                                              |
|                                  |                                                                                                                                                                                                                   |



1  
2  
3  
4 1 **Comparison of fracture risk using different supplemental doses of vitamin D, calcium or their**  
5  
6 2 **combination: a network meta-analysis of randomized controlled trials**  
7  
8

9 3 Zhi-Chao Hu<sup>1,2,3</sup>, Qian Tang<sup>1,2,3</sup>, Chang-Min Sang<sup>4</sup>, Li Tang<sup>1,2,3</sup>, Xiao-Bin Li<sup>1,2,3</sup>, Gang Zheng<sup>1,2,3</sup>,  
10  
11 4 Zhen-Hua Feng<sup>1,2,3</sup>, Jiang-Wei Xuan<sup>1,2,3</sup>, Zhi-Hao Shen<sup>1,2,3</sup>, Li-Yan Shen<sup>1,2,3</sup>, Wen-Fei Ni<sup>1,2,3,\*</sup> and  
12  
13  
14 5 Ai-Min Wu<sup>1,2,3,\*</sup>  
15  
16  
17 6

18  
19  
20 7 **Affiliations:**

21  
22 8 1. Department of Orthopaedics, The Second Affiliated Hospital and Yuying Children's Hospital of  
23  
24 9 Wenzhou Medical University, Wenzhou, Zhejiang, 325027, China.

25  
26  
27 10 2. The Second School of Medicine, Wenzhou Medical University, Wenzhou, Zhejiang, 325027, China.

28  
29  
30 11 3. Bone Research Institute, The Key Orthopaedic Laboratory of Zhejiang Province, Wenzhou,  
31  
32 12 Zhejiang, 325027, China.

33  
34  
35 13 4. Department of Orthopaedics, The Affiliated Hospital of Jiujiang Medical College, Jiujiang, Jiangxi,  
36  
37 14 332000, China.

38  
39  
40 15 **\*Correspondence author:**

41  
42  
43 16 Ai-Min Wu, **email:** aiminwu@wmu.edu.cn

44  
45 17 Wen-Fei Ni, **email:** wenfeini@yeah.net

46  
47  
48 18 **Phone:** +86 0577 88002814;

49  
50 19 **Fax:** +86 057788002823;

51  
52  
53 20

54  
55  
56 21 Zhi-Chao Hu and Qian Tang contributed equally to this work.

57  
58  
59 22  
60

1  
2  
3  
4 23 **Abstract**

5  
6 24 **Objective** Inconsistent findings in regard to association between different concentrations of vitamin D,  
7  
8  
9 25 calcium or their combination and the risk of fracture have been reported during the past decade in  
10  
11 26 community-dwelling older people. This study was designed to compare the fracture risk using different  
12  
13  
14 27 concentrations of vitamin D, calcium or their combination.

15  
16  
17 28 **Design** A systematic review and network meta-analysis.

18  
19 29 **Data sources** Randomized controlled trials in PubMed, Cochrane library, and EMBASE databases  
20  
21  
22 30 were systematically searched from the inception dates to December 31, 2017.

23  
24  
25 31 **Outcomes** Total fracture was defined as the primary outcome. Secondary outcomes were hip fracture  
26  
27 32 and vertebral fracture. Due to the consistency of the original studies, a consistency model was adopted.

28  
29  
30 33 **Results** A total of 25 randomized controlled trials involving 43510 participants fulfilled the inclusion  
31  
32 34 criteria. There was no evidence that the risk of total fracture was reduced by using different  
33  
34  
35 35 concentrations of vitamin D, calcium or their combination compared with placebo or no treatment. No  
36  
37 36 significant associations were found between calcium, vitamin D, or combined calcium and vitamin D  
38  
39  
40 37 supplements and the incidence of hip, or vertebral fractures.

41  
42  
43 38 **Conclusions** The use of supplements that included calcium, vitamin D, or both was not found to be  
44  
45 39 better than placebo or no treatment in terms of risk of fractures among community-dwelling older  
46  
47  
48 40 adults. It means the routine use of these supplements in community-dwelling older people should be  
49  
50  
51 41 treated more carefully.

52  
53 42 **Prospero registration number** CRD42017079624

54  
55  
56 43 **Keywords:** Calcium; Vitamin D; Fractures; network meta-analysis

57  
58 44 **Strengths and limitations of this study**  
59  
60

- 1  
2  
3  
4 45 • This systematic review and meta-analysis combined the evidence from randomized controlled trials.  
5  
6 46 • Our findings may not support the routine use of these supplements in community-dwelling older  
7  
8  
9 47 people.  
10  
11 48 • This work does not necessarily preclude any benefit of vitamin D and calcium supplementation in  
12  
13  
14 49 older, frail individuals.  
15  
16  
17 50 • Potential missing data and meta-biases, heterogeneity, which may limit the quality of evidence.  
18

## 19 51 **Introduction**

22 52 Clinical fractures of the elderly represent a worldwide public health problem that leads to illness and  
23  
24  
25 53 social burden. The patients with osteoporosis in the European Union were estimated to be 27.5 million  
26  
27  
28 54 in 2010, and 3.5 million new fragility fractures were sustained<sup>1</sup>. In Asia, the average cost of  
29  
30  
31 55 osteoporotic fractures accounted for 18.95% of the countries' 2014 gross domestic product  
32  
33  
34 56 (GDP)/capita and increased annually<sup>2-4</sup>. The overall prevalence of osteoporosis or low bone mass in  
35  
36  
37 57 non-institutional population over the age of 50 in the USA was estimated at 10.3% and 43.9%,  
38  
39  
40 58 respectively, which means that 10.2 million elderly people had osteoporosis and 43.4 million people  
41  
42  
43 59 had low bone mass in 2010<sup>5</sup>. With the demographic trend of ageing and the predicted increase in life  
44  
45  
46 60 expectancy, the cost of fracture treatment is expected to rise.

47  
48 61 Dietary allowances for calcium range from 700 to 1200 mg/d and vitamin D of 600-800 IU/d have  
49  
50  
51 62 long been recommended for the prevention of osteoporotic fractures in the elderly<sup>6 7</sup>. The supplements  
52  
53  
54 63 of calcium and vitamin D are commonly taken to maintain bone health.

55  
56 64 However, the previous randomized controlled trials (RCT) and meta-analyses concerning vitamin D,  
57  
58  
59 65 calcium, or their combination for fractures yielded different efficacy outcomes. For instance, two  
60  
61  
62 66 meta-analyses demonstrated calcium or vitamin D supplementation alone has a small benefit on bone



1  
2  
3  
4 67 mineral density (BMD), but no clinically important to prevent fractures<sup>8 9</sup>, while an updated  
5  
6 68 meta-analysis and a pooled analysis found calcium plus vitamin D supplementation can significantly  
7  
8  
9 69 reduce hip fractures by 30% and total fractures by 15%<sup>10 11</sup>. Two RCTs reported that low dose of  
10  
11 70 vitamin D supplementation (less than 800 IU/d) can reduce the incidence of falls<sup>12</sup> and may prevent  
12  
13  
14 71 fractures without adverse effects<sup>13</sup>, but other RCTs showed no significant reduction in the incidence of  
15  
16  
17 72 hip or other peripheral fractures<sup>14 15</sup> and its possible effects were seen only in patients with initial  
18  
19  
20 73 calcium insufficiency. Based on the evidence from meta-analysis, Bischoff-Ferrari et al <sup>16</sup> illustrated  
21  
22 74 that high-dose vitamin D supplementation (800 IU/d or higher) not only reduced the risk of falls and  
23  
24  
25 75 hip fractures, but also prevented non-vertebral fractures. In contrast, a study reported annual high-dose  
26  
27  
28 76 oral vitamin D resulted in an increased risk of falls and fractures <sup>17</sup>. On the other hand, low-dose  
29  
30  
31 77 calcium supplementation (less than 800mg/d) effectively led to a sustained reduction in the rate of bone  
32  
33  
34 78 loss <sup>18</sup> and turnover. Although it was also reported that the high dose of calcium (800 mg/d or higher)  
35  
36  
37 79 was associated with a lower risk of clinical fractures <sup>19</sup>. The high-dose calcium with high-dose vitamin  
38  
39  
40 80 D can't prevent fractures according to the evidence from reported RCT <sup>20</sup>, but a meta-analysis  
41  
42  
43 81 supported their combination can prevent bone loss and significantly reduce the risk of hip fractures and  
44  
45  
46 82 all osteoporotic fractures <sup>21</sup>. Thus, it's challenging to conclude a dose-response relation between the  
47  
48  
49 83 intakes of vitamin D, calcium, or their combination and the main outcomes in these heterogeneous  
50  
51  
52 84 literatures.

53  
54  
55  
56 85 Therefore, this study was designed to compare the fracture risk using different concentrations of  
57  
58  
59 86 vitamin D, calcium or their combination, and comprehensively evaluate the optimal concentration to  
60  
87 guide clinical practice and public prevention in community-dwelling older people.

## 88 **Methods**

## 89 Search strategy and selection criteria

90 This review and meta-analysis is based on the Preferred Reporting Items for Systematic Reviews and  
91 Meta-Analysis (PRISMA) extension statement for network meta-analysis. Our meta-analysis was  
92 registered prospectively in PROSPERO (CRD42017079624) and the Checklist PRISMA 2009  
93 (Supplementary Table 1) will be used and check our final reports <sup>22</sup>.

94 We restricted our meta-analysis to the inclusion criteria should meet following details: (1) RCTs; (2)  
95 Interventions must be one of the following three: vitamin D only, calcium only, both vitamin D and  
96 calcium; (3) Complete outcome data of fracture; (4) Trials enrolling adults older than 50 years and  
97 living in their communities; (5) Only studies that lasted more than a year. Exclusion criteria were (1)  
98 Calcium or vitamin D combined with other therapies (eg: hormones, exercise); (2) Trials in which  
99 vitamin D analogues (eg: calcitriol) or hydroxylated vitamin D were used; (3) Trials in which dietary  
100 intake of calcium or vitamin D (eg: from milk) was evaluated; (4) Patients suffering from illness or  
101 long-term use of certain drugs affecting the stability of the calcium metabolism, such as metabolic bone  
102 disease, bone tumour, treatment of steroids and so on.

103 Participants must be randomly assigned to two or more following groups: (1) high calcium (800  
104 mg/d or higher) only; (2) low calcium (less than 800 mg/d) only; (3) high vitamin D (800 IU/d or  
105 higher) only; (4) low vitamin D (less than 800 IU/d) only; (5) high calcium (800 mg/d or higher) + high  
106 vitamin D (800 IU/d or higher); (6) high calcium + low vitamin D (less than 800 IU/d); (7) low calcium  
107 (less than 800 mg/d) + high vitamin D; (8) low calcium + low vitamin D; (9) placebo. The  
108 interventions should be compared with placebo.

109 Two authors (ZHF and GZ) independently searched the electronic literature database of PubMed,  
110 Embase, Cochrane database on December 31, 2017 (detailed search strategies are reported in

1  
2  
3  
4 111 **supplementary Table 2**). Related articles and reference lists were searched to avoid original miss. The  
5  
6 112 reference studies of previous systematic reviews, meta-analysis, and included studies were manually  
7  
8  
9 113 searched to avoid initial miss. After 2 authors assessed the potentially eligible studies independently,  
10  
11 114 any disagreement was discussed and resolved with the third independent author (QT).

#### 14 115 **Data collection and assessment of risk of bias**

16  
17 116 Two reviewers (ZHS and XBL) independently extracted data, and the third reviewer (LT) checked  
18  
19 117 the consistency between them. A standard data extracted form was used at this stage, including the  
20  
21 118 authors, publishing date, country, participant characteristics; doses of calcium, vitamin D, or their  
22  
23 119 combination; dietary calcium intake; baseline serum 25-hydroxyvitamin D concentration; and trial  
24  
25 120 duration. For continuous outcomes, the mean, SD (standard deviation) and participant number will be  
26  
27 121 extracted. For dichotomous outcomes, we extracted the total numbers and the numbers of events of  
28  
29 122 both groups. The data in other forms was recalculated when possible to enable pooled analysis.

30  
31  
32  
33  
34  
35 123 We used the Cochrane risk of bias tool to assess risk bias of included studies. The tool has seven  
36  
37 124 domains including random sequence generation, allocation concealment, blinding of participants and  
38  
39 125 personnel, blinding of outcome assessment, incomplete outcome data, selective reporting and other  
40  
41 126 bias. The classification of the judgment for each domain was low risk of bias, high risk of bias, or  
42  
43 127 unclear risk of bias and two authors (ZHF and GZ) independently evaluated the risk of studies.

#### 48 128 **Data synthesis and statistical analysis**

49  
50 129 The data was extracted and input into the STATA software (version 12.0; StataCorp, College  
51  
52 130 Station, TX, USA) for network meta-analysis. And we generated network plots for each outcome to  
53  
54 131 illustrate which interventions had been compared directly in the included studies. Network  
55  
56 132 meta-analysis is an extension of standard meta-analysis to compare multiple treatments based on  
57  
58  
59  
60

1  
2  
3  
4 133 randomized controlled trial evidence, which forms a connected network of comparisons. Treatment  
5  
6 134 effect estimates from network meta-analysis exploit both the direct comparisons within trials and the  
7  
8  
9 135 indirect comparisons across trials. To choose the random effects or fixed effects model, we either make  
10  
11 136 a judgement about what is most likely to be appropriate based on the assumptions of the different  
12  
13  
14 137 models or conduct both fixed or random effects and compare which seems to fit the data better<sup>23</sup>.  
15  
16  
17 138 Relative risk (RR) with 95% confidence intervals (CIs) was calculated for dichotomous outcomes  
18  
19 139 while weighted mean difference (WMD) with 95% CIs for the continuous. Inconsistency refers to  
20  
21  
22 140 differences between direct and various indirect effect estimates for the same comparison. To assess  
23  
24  
25 141 inconsistency, we estimated the inconsistency factors in closed loop based on the method described by  
26  
27 142 Chaimani et al<sup>24</sup>. The heterogeneity in each closed loop was estimated by utilizing inconsistency factor  
28  
29  
30 143 (IF). If the 95% confidence intervals (95% CI) of IF values are not truncated at zero, it suggests that the  
31  
32  
33 144 inconsistency among studies has statistical significance. We used the surface under the cumulative  
34  
35  
36 145 ranking probabilities (SUCRA) to indicate which treatment was the best one. The funnel plot was used  
37  
38 146 to identify possible publication bias if the number of studies was larger than 10.

#### 147 **Patient and public involvement**

148 No patients were involved in setting the research question or the outcome measures, and no patients  
149 were involved in developing plans for design or implementation of the study. Furthermore, no patients  
150 were asked to advice on interpretation or writing up of results. Since this meta-analysis used  
151 aggregated data from previous trials, it is unable to disseminate the results of the research to study  
152 participants directly.

#### 153 **Result**

#### 154 **Data Retrieval**

1  
2  
3  
4 155 In summary, a total of 7909 potential records were initially identified through PubMed (5187),  
5  
6 156 Embase (2688), Cochrane Data base (34). Based on our review of the title and abstract, 99 full-text  
7  
8  
9 157 papers were reviewed and 25 studies<sup>13 17 19 20 25-45</sup> met inclusion criteria (**Figure 1**).

### 11 158 **Study and Patient Characteristics**

12  
13  
14 159 The characteristics of all 25 included studies were summarized and shown in **supplementary Table**  
15  
16  
17 160 **3**. And the detailed data of outcomes was collected in **supplementary Table 4**. The papers had similar  
18  
19 161 distributions of sex, age, country, intervention and all of them were community-dwelling older people.  
20  
21  
22 162 Hansson et al<sup>29</sup> did not report the residential status of participants, although a previous meta-analysis  
23  
24 163 classified this status as community. The trial by Hansson et al was included, but a sensitivity analysis  
25  
26  
27 164 was performed that excluded that trial (**supplementary Figure 1**).

28  
29  
30 165 **Supplementary Figure 2** showed the assessment of the risk of bias. All studies were randomized;  
31  
32 166 17 were double-blind, placebo-controlled trials; 13 trials described an adequate random sequence  
33  
34  
35 167 generation process; and 11 trials described the methods used for allocation concealment. No obvious  
36  
37  
38 168 publication bias was reported according to the **supplementary Figure 3, supplementary Figure 4** and  
39  
40 169 **supplementary Figure 5**.

### 41 170 **Inconsistence and heterogeneity check**

42  
43  
44  
45 171 The statistical inconsistency between direct and indirect comparisons was generally low according to  
46  
47  
48 172 inconsistency test because the CI values included zero (**supplementary Figure 6, supplementary**  
49  
50 173 **Figure 7, supplementary Figure 8**). Therefore, we adopted a consistency model in all three groups.  
51  
52  
53 174 Meanwhile, we adopted the fixed effects models and the heterogeneity parameter  $I^2$  values were 8.4%,  
54  
55  
56 175 0% and 0% respectively, which indicated no obvious heterogeneity was observed in all these results  
57  
58  
59 176 (**supplementary Figure 9, supplementary Figure 10, supplementary Figure 11**).

1  
2  
3  
4 177 **Primary outcome: total fracture**

5  
6 178 For estimating the vitamin D, calcium or their combination efficacy against total fractures, we  
7  
8  
9 179 looked at data from 24965 individuals from 18 studies<sup>13 17 19 20 25 26 28 30 31 33-35 37 39 40 43-45</sup>. Pooled  
10  
11 180 estimates included 15 studies with one treatment, 1 study with two treatments, and 2 studies with three  
12  
13  
14 181 treatments.

15  
16  
17 182 The network plot of comparisons on total fractures was shown in **Figure 2A**. The forest plot for the  
18  
19 183 network meta-analysis was shown in **Figure 3**. The RR values and 95% CIs are summarized in **Figure**  
20  
21  
22 184 **3**. The direct and indirect comparisons indicated no differences among the vitamin D, calcium or their  
23  
24  
25 185 combination that remained in the main network. Neither do the statistical differences between  
26  
27 186 interventions and placebo ( $P<0.05$ ). So we didn't continue to make ranking graph of distribution of  
28  
29  
30 187 probabilities on total fractures.

31  
32  
33 188 **Secondary outcomes: hip fracture and vertebral fracture**

34  
35 189 A total of 41845 individuals were included from 16 studies<sup>13 17 19 20 25-28 30 32 33 37 39 40 42 43</sup> for evaluate  
36  
37 190 the drug efficacy against hip fractures. Pooled estimates included 13 studies with one treatment, 1 study  
38  
39  
40 191 with two treatments, and two studies with three treatments.

41  
42  
43 192 The network plot of comparisons on hip fractures was shown in **Figure 2B**. The forest plot for the  
44  
45 193 network meta-analysis was shown in **Figure 4**. The RR values and 95% CIs are summarized in **Figure**  
46  
47  
48 194 **4**. The direct and indirect comparisons indicated no differences among the vitamin D, calcium or their  
49  
50  
51 195 combination that remained in the main network. Neither do the statistical differences between drug  
52  
53 196 experimental groups and placebo ( $P<0.05$ ). So we didn't continue to make ranking graph of  
54  
55  
56 197 distribution of probabilities on total fractures.

57  
58 198 A total of 17612 individuals were collected from 12 studies<sup>13 17 19 20 25 28 29 36 38-41</sup> involving vertebral  
59  
60

1  
2  
3  
4 199 fractures. Pooled estimates included 10 studies with one treatment, and two studies with three  
5  
6 200 treatments.

7  
8  
9 201 The network plot of comparisons on vertebral fractures was shown in **Figure 2C**. The forest plot for  
10  
11 202 the network meta-analysis was shown in **Figure 5**. The RR values and 95% CIs are summarized in  
12  
13  
14 203 **Figure 5**. The direct and indirect comparisons indicated no differences among the vitamin D, calcium  
15  
16  
17 204 or their combination that remained in the main network. Neither do the statistical differences between  
18  
19  
20 205 drug experimental groups and placebo ( $P < 0.05$ ). So we didn't continue to make ranking graph of  
21  
22 206 distribution of probabilities on total fractures. In a separate sensitivity analysis, we excluded Hansson's  
23  
24  
25 207 study<sup>29</sup> (**supplementary Figure 1**). However, there was still no significant association of vitamin D,  
26  
27 208 calcium or their combination with total fracture.

## 29 209 **Discussion**

30  
31  
32 210 Vitamin D supplementation and calcium are suggested as interventions to treat and prevent fracture.  
33  
34  
35 211 We found the previous meta-analyses and RCTs are critically inconsistent in efficacy of different doses  
36  
37  
38 212 of vitamin D with calcium on fractures.

39  
40 213 Results of this meta-analysis showed that calcium, calcium plus vitamin D, and vitamin D  
41  
42  
43 214 supplementation alone were not significantly associated with a lower incidence of hip, vertebral, or  
44  
45  
46 215 total fractures in community-dwelling older adults. Sensitivity analyses that excluded low-quality trials  
47  
48  
49 216 and studies that exclusively enrolled patients with particular medical conditions did not alter these  
50  
51 217 results.

52  
53 218 A meta-analysis conducted by Jia-Guo Zhao et al<sup>46</sup> showed that no significant difference was found  
54  
55  
56 219 in the incidence of hip or other fractures, which was similar to our result. However, the object of  
57  
58  
59 220 Zhao's study was to investigate whether calcium, vitamin D, or combined calcium and vitamin D  
60

1  
2  
3  
4 221 supplement are associated with a lower fracture incidence while our study was designed to evaluate the  
5  
6 222 optimal concentration of them. Meanwhile, in Zhao's meta-analysis, the participants of the included  
7  
8  
9 223 study reported by Massart<sup>47</sup> were adult maintenance hemodialysis patients, which may result in the  
10  
11 224 imbalance of calcium in the body. Patients on hemodialysis may also be receiving  
12  
13  
14 225 1,25-dihydroxyvitamin D, which may affect their response to vitamin D supplementation. So we did  
15  
16  
17 226 not include that trial in our network meta-analysis. What's more, we didn't include studies that lasted  
18  
19 227 less than a year because we thought this time-frame was too short to see anti-fracture efficacy. And we  
20  
21  
22 228 suspected that a network meta-analysis might be a more suitable choice concerning all these different  
23  
24  
25 229 interventions mixed.

26  
27 230 Bischoff-Ferrari et al <sup>48</sup> reported that high-dose vitamin D supplementation (800 IU/d or higher)  
28  
29  
30 231 played an important role in the reduction of the risk of falls and hip fractures, as well as prevented  
31  
32  
33 232 non-vertebral fractures in adults 65 years or older. However, their findings may have been influenced  
34  
35  
36 233 by the trial of Chapuy et al <sup>49</sup>, which only enrolled participants living in an institution. What's more,  
37  
38 234 differences in conclusions of previous meta-analyses and the current meta-analysis were due to the  
39  
40  
41 235 recently published trials which reported neutral or harmful associations of vitamin D supplementation  
42  
43  
44 236 and fracture incidence more and more. Study findings here indicated that vitamin D might result in a  
45  
46  
47 237 higher risk for hip fracture, but this conclusion did not reach statistical significance. This finding may  
48  
49  
50 238 be attributable to lack of statistical power in this meta-analysis.

51 239 Most recently there was a meta-analysis published in the Lancet by Bolland et al<sup>50</sup>, whose findings  
52  
53  
54 240 suggested that vitamin D supplementation does not prevent fractures or falls, or have clinically  
55  
56  
57 241 meaningful effects on bone mineral density. Although it was similar to our study to some extent, they  
58  
59  
60 242 are really different. First, we only included community-dwelling older people. We found that some



1  
2  
3  
4 243 meta-analyses equated community-dwelling older people with those in nursing institution. The lack of  
5  
6  
7 244 exercise, dietary intake and exposure to sunlight made people in nursing institution turned more  
8  
9 245 susceptible to the use of supplements including vitamin D, calcium or their combination. Although the  
10  
11  
12 246 studies involving participants living in nursing institution were only a small part, but it could change  
13  
14  
15 247 the whole outcomes and produce false positive results. We found only Avenell's study paid attention to  
16  
17  
18 248 this question when they conducted a subgroup analysis, but they did not discussed separately.  
19  
20  
21 249 Meanwhile, we only enrolled adults older than 50 years and trial duration more than 1 year to reduce  
22  
23  
24 250 the statistical heterogeneity in network meta-analysis. Furthermore, the current analyses included  
25  
26  
27 251 calcium supplementation, where the Bolland's study focused on vitamin D.

27 252 However, possible limitations of this study protocol include potential missing data and meta-biases,  
28  
29  
30 253 heterogeneity, which may limit the quality of evidence. Some RCTs were of poor quality and, for  
31  
32  
33 254 example, used unclear allocation concealment. So we made a sensitivity analysis by excluding  
34  
35  
36 255 low-quality trials. Meanwhile, some study characteristics such as baseline serum 25-hydroxyvitamin D  
37  
38  
39 256 concentrations might be to contribute heterogeneity so future analyses are still needed to explore this  
40  
41  
42 257 potential heterogeneity. What's more, we combined bolus dosing by injection with oral supplements  
43  
44  
45 258 taken daily/monthly/yearly, which might have different effects on vitamin D status in the body. In  
46  
47  
48 259 addition, the report ignored the effect of treatment with vitamin D on plasma 25-hydroxy-vitamin D  
49  
50  
51 260 concentrations and sub-types of fracture, such as pathologic fractures; this work does not necessarily  
52  
53  
54 261 preclude any benefit of vitamin D and calcium supplementation in older, frail individuals.

## 262 **Conclusions**

263 In this meta-analysis of randomized clinical trials, we found that the use of different concentrations of  
264  
265  
266 264 vitamin D, calcium or their combination in community-dwelling older adults was not associated with a

1  
2  
3  
4 265 lower risk of fractures. Our findings may not support the routine use of these supplements in  
5  
6 266 community-dwelling older people.  
7  
8

9 267 **Contributors**

10  
11 268 ZCH and AMW conceived the study. The search strategy was developed by LT and XBL. ZHF, GZ  
12  
13  
14 269 and QT will complete electronic search, select publications and assess their eligibility. ZHS and XBL  
15  
16  
17 270 will extract information of the included studies after screening. JWX will check the data entry for  
18  
19  
20 271 accuracy and completeness. ZCH and LT will give advice for data analysis and presentation of study  
21  
22  
23 272 result. LYS and CMS contributed to the text revision. WFN and AMW supervised the overall conduct  
24  
25 273 of the study. All the authors drafted and critically reviewed and approved the final manuscript.  
26

27 274 **Funds and Acknowledgement**

28  
29  
30 275 This work was funded by the National Natural Science Foundation of China (81501933, 81572214),  
31  
32  
33 276 Zhejiang Provincial Natural Science Foundation of China (LY14H060008), Zhejiang Provincial  
34  
35  
36 277 Medical Technology Foundation of China (2018254309, 2015111494), Wenzhou leading talent  
37  
38 278 innovative project (RX2016004) and Wenzhou Municipal Science and Technology Bureau  
39  
40 279 (Y20170389). The funders had no role in the design, execution, or writing of the study.  
41  
42

43 280 **Conflicts of interest**

44  
45 281 None declared  
46  
47

48 282 **Patient consent**

49  
50 283 Not required.  
51  
52

53 284 **Provenance and peer review**

54  
55  
56 285 Not commissioned; externally peer reviewed.  
57

58 286 **Data availability statement**  
59  
60

1  
2  
3  
4  
5  
6  
7  
8  
9  
10  
11  
12  
13  
14  
15  
16  
17  
18  
19  
20  
21  
22  
23  
24  
25  
26  
27  
28  
29  
30  
31  
32  
33  
34  
35  
36  
37  
38  
39  
40  
41  
42  
43  
44  
45  
46  
47  
48  
49  
50  
51  
52  
53  
54  
55  
56  
57  
58  
59  
60

287 All data relevant to the study are included in the article or uploaded as supplementary information.

## 288 **References**

- 289 1. Svedbom A, Hernlund E, Ivergard M, et al. Osteoporosis in the European Union: a compendium of  
290 country-specific reports. *Arch Osteoporos* 2013;8:137. doi: 10.1007/s11657-013-0137-0
- 291 2. Mohd-Tahir NA, Li SC. Economic burden of osteoporosis-related hip fracture in Asia: a systematic  
292 review. *Osteoporos Int* 2017;28(7):2035-44. doi: 10.1007/s00198-017-3985-4
- 293 3. Kim J, Lee E, Kim S, et al. Economic Burden of Osteoporotic Fracture of the Elderly in South Korea: A  
294 National Survey. *Value Health Reg Issues* 2016;9:36-41. doi: 10.1016/j.vhri.2015.09.007
- 295 4. Qu B, Ma Y, Yan M, et al. The economic burden of fracture patients with osteoporosis in western  
296 China. *Osteoporos Int* 2014;25(7):1853-60. doi: 10.1007/s00198-014-2699-0
- 297 5. Wright NC, Looker AC, Saag KG, et al. The recent prevalence of osteoporosis and low bone mass in  
298 the United States based on bone mineral density at the femoral neck or lumbar spine. *J Bone*  
299 *Miner Res* 2014;29(11):2520-6. doi: 10.1002/jbmr.2269
- 300 6. Consensus conference: Osteoporosis. *JAMA* 1984;252(6):799-802.
- 301 7. Ross AC. The 2011 report on dietary reference intakes for calcium and vitamin D. *Public Health Nutr*  
302 2011;14(5):938-9. doi: 10.1017/S1368980011000565
- 303 8. Shea B, Wells G, Cranney A, et al. Meta-analyses of therapies for postmenopausal osteoporosis. VII.  
304 Meta-analysis of calcium supplementation for the prevention of postmenopausal  
305 osteoporosis. *Endocr Rev* 2002;23(4):552-9. doi: 10.1210/er.2001-7002
- 306 9. Reid IR, Bolland MJ, Grey A. Effects of vitamin D supplements on bone mineral density: a systematic  
307 review and meta-analysis. *Lancet* 2014;383(9912):146-55. doi:  
308 10.1016/s0140-6736(13)61647-5 [published Online First: 2013/10/15]
- 309 10. Weaver CM, Alexander DD, Boushey CJ, et al. Calcium plus vitamin D supplementation and risk of  
310 fractures: an updated meta-analysis from the National Osteoporosis Foundation. *Osteoporos*  
311 *Int* 2016;27(1):367-76. doi: 10.1007/s00198-015-3386-5
- 312 11. Group D. Patient level pooled analysis of 68 500 patients from seven major vitamin D fracture  
313 trials in US and Europe. *BMJ* 2010;340:b5463. doi: 10.1136/bmj.b5463
- 314 12. Flicker L, MacInnis RJ, Stein MS, et al. Should older people in residential care receive vitamin D to  
315 prevent falls? Results of a randomized trial. *J Am Geriatr Soc* 2005;53(11):1881-8. doi:  
316 10.1111/j.1532-5415.2005.00468.x [published Online First: 2005/11/09]
- 317 13. Trivedi DP, Doll R, Khaw KT. Effect of four monthly oral vitamin D3 (cholecalciferol)  
318 supplementation on fractures and mortality in men and women living in the community:  
319 randomised double blind controlled trial. *Bmj* 2003;326(7387):469. doi:  
320 10.1136/bmj.326.7387.469 [published Online First: 2003/03/01]
- 321 14. Lyons RA, Johansen A, Brophy S, et al. Preventing fractures among older people living in  
322 institutional care: a pragmatic randomised double blind placebo controlled trial of vitamin D  
323 supplementation. *Osteoporos Int* 2007;18(6):811-8. doi: 10.1007/s00198-006-0309-5  
324 [published Online First: 2007/05/03]
- 325 15. Law M, Withers H, Morris J, et al. Vitamin D supplementation and the prevention of fractures and  
326 falls: results of a randomised trial in elderly people in residential accommodation. *Age*  
327 *Ageing* 2006;35(5):482-6. doi: 10.1093/ageing/afj080 [published Online First: 2006/04/28]
- 328 16. Bischoff-Ferrari HA, Willett WC, Wong JB, et al. Prevention of nonvertebral fractures with oral

- 1  
2  
3 329 vitamin D and dose dependency: a meta-analysis of randomized controlled trials. *Arch Intern*  
4 330 *Med* 2009;169(6):551-61. doi: 10.1001/archinternmed.2008.600 [published Online First:  
5 331 2009/03/25]
- 6  
7 332 17. Sanders KM, Stuart AL, Williamson EJ, et al. Annual high-dose oral vitamin D and falls and fractures  
8 333 in older women: a randomized controlled trial. *Jama* 2010;303(18):1815-22. doi:  
9 334 10.1001/jama.2010.594 [published Online First: 2010/05/13]
- 10  
11 335 18. Nakamura K, Saito T, Kobayashi R, et al. Effect of low-dose calcium supplements on bone loss in  
12 336 perimenopausal and postmenopausal Asian women: a randomized controlled trial. *J Bone*  
13 337 *Miner Res* 2012;27(11):2264-70. doi: 10.1002/jbmr.1676
- 14  
15 338 19. Prince RL, Devine A, Dhaliwal SS, et al. Effects of calcium supplementation on clinical fracture and  
16 339 bone structure: results of a 5-year, double-blind, placebo-controlled trial in elderly women.  
17 340 *Arch Intern Med* 2006;166(8):869-75. doi: 10.1001/archinte.166.8.869 [published Online  
18 341 First: 2006/04/26]
- 19  
20 342 20. Salovaara K, Tuppurainen M, Karkkainen M, et al. Effect of vitamin D(3) and calcium on fracture  
21 343 risk in 65- to 71-year-old women: a population-based 3-year randomized, controlled  
22 344 trial--the OSTPRE-FPS. *J Bone Miner Res* 2010;25(7):1487-95. doi: 10.1002/jbmr.48  
23 345 [published Online First: 2010/03/05]
- 24  
25 346 21. Boonen S, Lips P, Bouillon R, et al. Need for additional calcium to reduce the risk of hip fracture  
26 347 with vitamin d supplementation: evidence from a comparative metaanalysis of randomized  
27 348 controlled trials. *J Clin Endocrinol Metab* 2007;92(4):1415-23. doi: 10.1210/jc.2006-1404  
28 349 [published Online First: 2007/02/01]
- 29  
30 350 22. Moher D, Liberati A, Tetzlaff J, et al. Preferred reporting items for systematic reviews and  
31 351 meta-analyses: the PRISMA statement. *PLoS Med* 2009;6(7):e1000097. doi:  
32 352 10.1371/journal.pmed.1000097
- 33  
34 353 23. Zintzaras E, Ioannidis JP. Heterogeneity testing in meta-analysis of genome searches. *Genet*  
35 354 *Epidemiol* 2005;28(2):123-37. doi: 10.1002/gepi.20048 [published Online First: 2004/12/14]
- 36  
37 355 24. Chaimani A, Higgins JP, Mavridis D, et al. Graphical tools for network meta-analysis in STATA. *PLoS*  
38 356 *One* 2013;8(10):e76654. doi: 10.1371/journal.pone.0076654 [published Online First:  
39 357 2013/10/08]
- 40  
41 358 25. Avenell A, Grant AM, McGee M, et al. The effects of an open design on trial participant  
42 359 recruitment, compliance and retention--a randomized controlled trial comparison with a  
43 360 blinded, placebo-controlled design. *Clin Trials* 2004;1(6):490-8. doi:  
44 361 10.1191/1740774504cn053oa [published Online First: 2005/11/11]
- 45  
46 362 26. Baron JA, Beach M, Mandel JS, et al. Calcium supplements for the prevention of colorectal  
47 363 adenomas. Calcium Polyp Prevention Study Group. *N Engl J Med* 1999;340(2):101-7. doi:  
48 364 10.1056/nejm199901143400204 [published Online First: 1999/01/14]
- 49  
50 365 27. Dawson-Hughes B, Harris SS, Krall EA, et al. Effect of calcium and vitamin D supplementation on  
51 366 bone density in men and women 65 years of age or older. *N Engl J Med* 1997;337(10):670-6.  
52 367 doi: 10.1056/nejm199709043371003 [published Online First: 1997/09/04]
- 53  
54 368 28. Grant AM, Avenell A, Campbell MK, et al. Oral vitamin D3 and calcium for secondary prevention of  
55 369 low-trauma fractures in elderly people (Randomised Evaluation of Calcium Or vitamin D,  
56 370 RECORD): a randomised placebo-controlled trial. *Lancet* 2005;365(9471):1621-8. doi:  
57 371 10.1016/s0140-6736(05)63013-9 [published Online First: 2005/05/12]
- 58  
59 372 29. Hansson T, Roos B. The effect of fluoride and calcium on spinal bone mineral content: a  
60

- 1  
2  
3 373 controlled, prospective (3 years) study. *Calcif Tissue Int* 1987;40(6):315-7. [published Online  
4 374 First: 1987/06/01]
- 5  
6 375 30. Harwood RH, Sahota O, Gaynor K, et al. A randomised, controlled comparison of different calcium  
7 376 and vitamin D supplementation regimens in elderly women after hip fracture: The  
8 377 Nottingham Neck of Femur (NONOF) Study. *Age Ageing* 2004;33(1):45-51. [published Online  
9 378 First: 2003/12/30]
- 10  
11 379 31. Hin H, Tomson J, Newman C, et al. Optimum dose of vitamin D for disease prevention in older  
12 380 people: BEST-D trial of vitamin D in primary care. *Osteoporos Int* 2017;28(3):841-51. doi:  
13 381 10.1007/s00198-016-3833-y [published Online First: 2016/12/18]
- 14  
15 382 32. Jackson RD, LaCroix AZ, Gass M, et al. Calcium plus vitamin D supplementation and the risk of  
16 383 fractures. *N Engl J Med* 2006;354(7):669-83. doi: 10.1056/NEJMoa055218 [published Online  
17 384 First: 2006/02/17]
- 18  
19 385 33. Lips P, Graafmans WC, Ooms ME, et al. Vitamin D supplementation and fracture incidence in  
20 386 elderly persons. A randomized, placebo-controlled clinical trial. *Ann Intern Med*  
21 387 1996;124(4):400-6. [published Online First: 1996/02/15]
- 22  
23 388 34. Liu BX, Chen SP, Li YD, et al. The Effect of the Modified Eighth Section of Eight-Section Brocade on  
24 389 Osteoporosis in Postmenopausal Women: A Prospective Randomized Trial. *Medicine*  
25 390 (*Baltimore*) 2015;94(25):e991. doi: 10.1097/md.0000000000000991 [published Online First:  
26 391 2015/06/25]
- 27  
28 392 35. Mitri J, Dawson-Hughes B, Hu FB, et al. Effects of vitamin D and calcium supplementation on  
29 393 pancreatic beta cell function, insulin sensitivity, and glycemia in adults at high risk of  
30 394 diabetes: the Calcium and Vitamin D for Diabetes Mellitus (CaDDM) randomized controlled  
31 395 trial. *Am J Clin Nutr* 2011;94(2):486-94. doi: 10.3945/ajcn.111.011684 [published Online First:  
32 396 2011/07/01]
- 33  
34 397 36. Peacock M, Liu G, Carey M, et al. Effect of calcium or 25OH vitamin D3 dietary supplementation  
35 398 on bone loss at the hip in men and women over the age of 60. *J Clin Endocrinol Metab*  
36 399 2000;85(9):3011-9. doi: 10.1210/jcem.85.9.6836 [published Online First: 2000/09/22]
- 37  
38 400 37. Porthouse J, Cockayne S, King C, et al. Randomised controlled trial of calcium and  
39 401 supplementation with cholecalciferol (vitamin D3) for prevention of fractures in primary  
40 402 care. *Bmj* 2005;330(7498):1003. doi: 10.1136/bmj.330.7498.1003 [published Online First:  
41 403 2005/04/30]
- 42  
43 404 38. Recker RR, Henders S, Davies KM, et al. Correcting calcium nutritional deficiency prevents spine  
44 405 fractures in elderly women. *J Bone Miner Res* 1996;11(12):1961-6. doi:  
45 406 10.1002/jbmr.5650111218 [published Online First: 1996/12/01]
- 46  
47 407 39. Reid IR, Ames RW, Evans MC, et al. Effect of calcium supplementation on bone loss in  
48 408 postmenopausal women. *N Engl J Med* 1993;328(7):460-4. doi:  
49 409 10.1056/nejm199302183280702 [published Online First: 1993/02/18]
- 50  
51 410 40. Reid IR, Mason B, Horne A, et al. Randomized controlled trial of calcium in healthy older women.  
52 411 *Am J Med* 2006;119(9):777-85. doi: 10.1016/j.amjmed.2006.02.038 [published Online First:  
53 412 2006/09/02]
- 54  
55 413 41. Riggs BL, O'Fallon WM, Muhs J, et al. Long-term effects of calcium supplementation on serum  
56 414 parathyroid hormone level, bone turnover, and bone loss in elderly women. *J Bone Miner Res*  
57 415 1998;13(2):168-74. doi: 10.1359/jbmr.1998.13.2.168 [published Online First: 1998/03/12]
- 58  
59 416 42. Smith H, Anderson F, Raphael H, et al. Effect of annual intramuscular vitamin D on fracture risk in

- 1  
2  
3 417 elderly men and women--a population-based, randomized, double-blind, placebo-controlled  
4 418 trial. *Rheumatology (Oxford)* 2007;46(12):1852-7. doi: 10.1093/rheumatology/kem240  
5 419 [published Online First: 2007/11/14]  
6  
7 420 43. Uusi-Rasi K, Patil R, Karinkanta S, et al. Exercise and vitamin D in fall prevention among older  
8 421 women: a randomized clinical trial. *JAMA Intern Med* 2015;175(5):703-11. doi:  
9 422 10.1001/jamainternmed.2015.0225 [published Online First: 2015/03/24]  
10  
11 423 44. Witham MD, Price RJ, Struthers AD, et al. Cholecalciferol treatment to reduce blood pressure in  
12 424 older patients with isolated systolic hypertension: the VitDISH randomized controlled trial.  
13 425 *JAMA Intern Med* 2013;173(18):1672-9. doi: 10.1001/jamainternmed.2013.9043 [published  
14 426 Online First: 2013/08/14]  
15  
16 427 45. Xue Y, Hu Y, Wang O, et al. Effects of Enhanced Exercise and Combined Vitamin D and Calcium  
17 428 Supplementation on Muscle Strength and Fracture Risk in Postmenopausal Chinese Women.  
18 429 *Zhongguo Yi Xue Ke Xue Yuan Xue Bao* 2017;39(3):345-51. doi:  
19 430 10.3881/j.issn.1000-503X.2017.03.008 [published Online First: 2017/07/12]  
20  
21 431 46. Zhao JG, Zeng XT, Wang J, et al. Association Between Calcium or Vitamin D Supplementation and  
22 432 Fracture Incidence in Community-Dwelling Older Adults: A Systematic Review and  
23 433 Meta-analysis. *Jama* 2017;318(24):2466-82. doi: 10.1001/jama.2017.19344 [published  
24 434 Online First: 2017/12/28]  
25  
26 435 47. Massart A, Debelle FD, Racape J, et al. Biochemical parameters after cholecalciferol repletion in  
27 436 hemodialysis: results From the VitaDial randomized trial. *Am J Kidney Dis*  
28 437 2014;64(5):696-705. doi: 10.1053/j.ajkd.2014.04.020 [published Online First: 2014/05/27]  
29  
30 438 48. Bischoff-Ferrari HA, Willett WC, Orav EJ, et al. A pooled analysis of vitamin D dose requirements  
31 439 for fracture prevention. *N Engl J Med* 2012;367(1):40-9. doi: 10.1056/NEJMoa1109617  
32 440 [published Online First: 2012/07/06]  
33  
34 441 49. Chapuy MC, Arlot ME, Duboeuf F, et al. Vitamin D3 and calcium to prevent hip fractures in elderly  
35 442 women. *N Engl J Med* 1992;327(23):1637-42. doi: 10.1056/nejm199212033272305  
36 443 [published Online First: 1992/12/03]  
37  
38 444 50. Bolland MJ, Grey A, Avenell A. Effects of vitamin D supplementation on musculoskeletal health: a  
39 445 systematic review, meta-analysis, and trial sequential analysis. *Lancet Diabetes Endocrinol*  
40 446 2018;6(11):847-58. doi: 10.1016/s2213-8587(18)30265-1 [published Online First:  
41 447 2018/10/09]  
42  
43  
44 448

449 **Legends:**

450 **Figure 1.** The selection of literature for included studies.

451 **Figure 2.** The network plot of comparisons on total fractures (A), hip fractures (B) and vertebral

1  
2  
3  
4  
5  
6  
7  
8  
9  
10  
11  
12  
13  
14  
15  
16  
17  
18  
19  
20  
21  
22  
23  
24  
25  
26  
27  
28  
29  
30  
31  
32  
33  
34  
35  
36  
37  
38  
39  
40  
41  
42  
43  
44  
45  
46  
47  
48  
49  
50  
51  
52  
53  
54  
55  
56  
57  
58  
59  
60

452 fractures (C). A: high calcium (800 mg/d or higher); B: low calcium (less than 800 mg/d); C: high  
453 vitamin D (800 IU/d or higher); D: low vitamin D (less than 800 IU/d)

454 **Figure 3.** The forest plot for the risk of total fractures. A: high calcium (800 mg/d or higher); B: low  
455 calcium (less than 800 mg/d); C: high vitamin D (800 IU/d or higher); D: low vitamin D (less than  
456 800 IU/d)

457 **Figure 4.** The forest plot for the risk of hip fractures. A: high calcium (800 mg/d or higher); B: low  
458 calcium (less than 800 mg/d); C: high vitamin D (800 IU/d or higher); D: low vitamin D (less than  
459 800 IU/d)

460 **Figure 5.** The forest plot for the risk of vertebral fractures. A: high calcium (800 mg/d or higher); B:  
461 low calcium (less than 800 mg/d); C: high vitamin D (800 IU/d or higher); D: low vitamin D (less  
462 than 800 IU/d)

463 **supplementary Figure 1.** A sensitivity analysis excluded the trial of Hansson et al. A: high calcium  
464 (800 mg/d or higher); B: low calcium (less than 800 mg/d); C: high vitamin D (800 IU/d or higher);  
465 D: low vitamin D (less than 800 IU/d)

466 **supplementary Figure 2.** Risk of Bias Assessment of All Included Studies

467 **supplementary Figure 3.** Publication bias for the total fractures. A: high calcium (800 mg/d or higher);

1  
2  
3  
4 468 B: low calcium (less than 800 mg/d); C: high vitamin D (800 IU/d or higher); D: low vitamin D (less  
5  
6 469 than 800 IU/d)  
7  
8  
9

10  
11 470 **supplementary Figure 4.** Publication bias for the hip fractures. A: high calcium (800 mg/d or higher);  
12  
13  
14 471 B: low calcium (less than 800 mg/d); C: high vitamin D (800 IU/d or higher); D: low vitamin D (less  
15  
16 472 than 800 IU/d)  
17  
18  
19

20  
21  
22 473 **supplementary Figure 5.** Publication bias for the vertebral fractures. A: high calcium (800 mg/d or  
23  
24 474 higher); B: low calcium (less than 800 mg/d); C: high vitamin D (800 IU/d or higher); D: low  
25  
26 475 vitamin D (less than 800 IU/d)  
27  
28  
29

30  
31  
32 476 **supplementary Figure 6.** Inconsistency test for the total fractures. A: high calcium (800 mg/d or  
33  
34 477 higher); B: low calcium (less than 800 mg/d); C: high vitamin D (800 IU/d or higher); D: low  
35  
36 478 vitamin D (less than 800 IU/d)  
37  
38  
39

40  
41  
42 479 **supplementary Figure 7.** Inconsistency test for the hip fractures. A: high calcium (800 mg/d or  
43  
44 480 higher); B: low calcium (less than 800 mg/d); C: high vitamin D (800 IU/d or higher); D: low  
45  
46 481 vitamin D (less than 800 IU/d)  
47  
48  
49

50  
51  
52 482 **supplementary Figure 8.** Inconsistency test for the vertebral fractures. A: high calcium (800 mg/d or  
53  
54 483 higher); B: low calcium (less than 800 mg/d); C: high vitamin D (800 IU/d or higher); D: low  
55  
56 484 vitamin D (less than 800 IU/d)  
57  
58  
59  
60



1  
2  
3  
4  
5  
6  
7  
8  
9  
10  
11  
12  
13  
14  
15  
16  
17  
18  
19  
20  
21  
22  
23  
24  
25  
26  
27  
28  
29  
30  
31  
32  
33  
34  
35  
36  
37  
38  
39  
40  
41  
42  
43  
44  
45  
46  
47  
48  
49  
50  
51  
52  
53  
54  
55  
56  
57  
58  
59  
60

485 **supplementary Figure 9.** Heterogeneity test for the total fractures. A: the result of random effects

486 model; B: the result of fixed effects model.

487 **supplementary Figure 10.** Heterogeneity test for the hip fractures. A: the result of random effects

488 model; B: the result of fixed effects model.

489 **supplementary Figure 11.** Heterogeneity test for the vertebral fractures. A: the result of random

490 effects model; B: the result of fixed effects model.

491

For peer review only



The selection of literature for included studies.

171x176mm (300 x 300 DPI)

1  
2  
3  
4  
5  
6  
7  
8  
9  
10  
11  
12  
13  
14  
15  
16  
17  
18  
19  
20  
21  
22  
23  
24  
25  
26  
27  
28  
29  
30  
31  
32  
33  
34  
35  
36  
37  
38  
39  
40  
41  
42  
43  
44  
45  
46  
47  
48  
49  
50  
51  
52  
53  
54  
55  
56  
57  
58  
59  
60



The network plot of comparisons on total fractures (A), hip fractures (B) and vertebral fractures (C). A: high calcium (800 mg/d or higher) ; B: low calcium (less than 800 mg/d) ; C: high vitamin D (800 IU/d or higher) ; D: low vitamin D (less than 800 IU/d)

272x96mm (300 x 300 DPI)

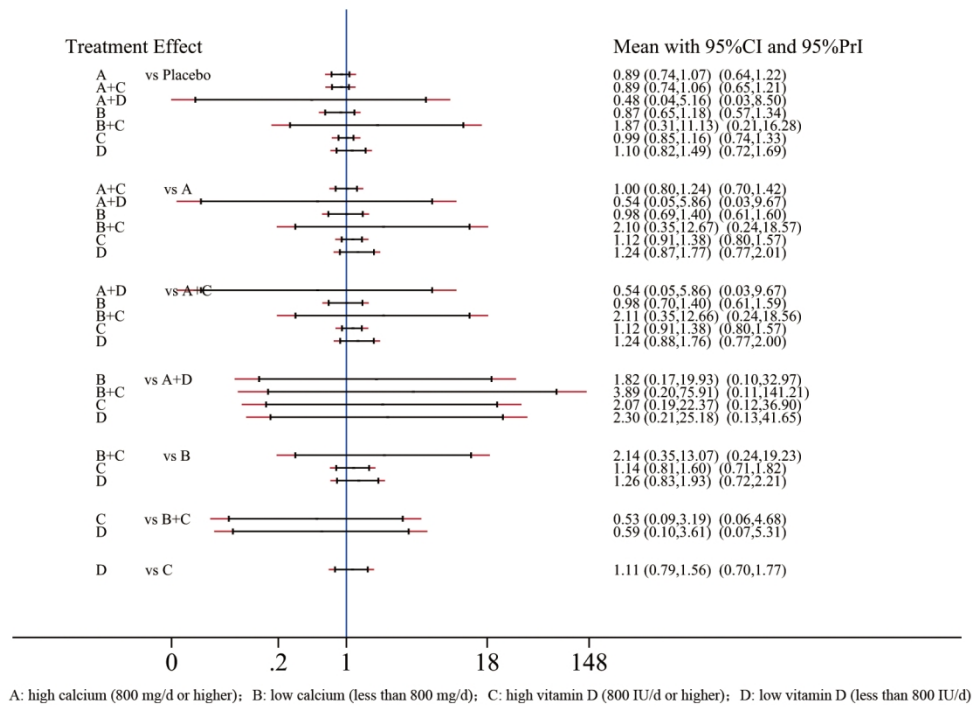

The forest plot for the risk of total fractures. A: high calcium (800 mg/d or higher) ; B: low calcium (less than 800 mg/d) ; C: high vitamin D (800 IU/d or higher) ; D: low vitamin D (less than 800 IU/d)



The forest plot for the risk of hip fractures. A: high calcium (800 mg/d or higher) ; B: low calcium (less than 800 mg/d) ; C: high vitamin D (800 IU/d or higher) ; D: low vitamin D (less than 800 IU/d)



The forest plot for the risk of vertebral fractures. A: high calcium (800 mg/d or higher) ; B: low calcium (less than 800 mg/d) ; C: high vitamin D (800 IU/d or higher) ; D: low vitamin D (less than 800 IU/d)

Supplementary Table 1 - Checklist of items to include when reporting a systematic review or meta-analysis

1  
2  
3  
4  
5  
6  
7  
8  
9  
10  
11  
12  
13  
14  
15  
16  
17  
18  
19  
20  
21  
22  
23  
24  
25  
26  
27  
28  
29  
30  
31  
32  
33  
34  
35  
36  
37  
38  
39  
40  
41  
42  
43  
44  
45  
46  
47

| Section/topic             | # | Checklist item                                                                                                                                                                                                                                                                                              | Reported on page # |
|---------------------------|---|-------------------------------------------------------------------------------------------------------------------------------------------------------------------------------------------------------------------------------------------------------------------------------------------------------------|--------------------|
| <b>TITLE</b>              |   |                                                                                                                                                                                                                                                                                                             |                    |
| Title                     | 1 | Identify the report as a systematic review, meta-analysis, or both.                                                                                                                                                                                                                                         | 1                  |
| <b>ABSTRACT</b>           |   |                                                                                                                                                                                                                                                                                                             |                    |
| Structured summary        | 2 | Provide a structured summary including, as applicable: background; objectives; data sources; study eligibility criteria, participants, and interventions; study appraisal and synthesis methods; results; limitations; conclusions and implications of key findings; systematic review registration number. | 2                  |
| <b>INTRODUCTION</b>       |   |                                                                                                                                                                                                                                                                                                             |                    |
| Rationale                 | 3 | Describe the rationale for the review in the context of what is already known.                                                                                                                                                                                                                              | 3                  |
| Objectives                | 4 | Provide an explicit statement of questions being addressed with reference to participants, interventions, comparisons, outcomes, and study design (PICOS).                                                                                                                                                  | 4                  |
| <b>METHODS</b>            |   |                                                                                                                                                                                                                                                                                                             |                    |
| Protocol and registration | 5 | Indicate if a review protocol exists, if and where it can be accessed (e.g., Web address), and, if available, provide registration information including registration number.                                                                                                                               | 5                  |
| Eligibility criteria      | 6 | Specify study characteristics (e.g., PICOS, length of follow-up) and report characteristics (e.g., years considered, language, publication status) used as criteria for eligibility, giving rationale.                                                                                                      | 5                  |
| Information sources       | 7 | Describe all information sources (e.g., databases with dates of coverage, contact with study authors to identify additional studies) in the search and date last searched.                                                                                                                                  | 5                  |
| Search                    | 8 | Present full electronic search strategy for at least one database, including any limits used, such that it could be repeated.                                                                                                                                                                               | 5                  |

1  
2  
3  
4  
5  
6  
7  
8  
9  
10  
11  
12  
13  
14  
15  
16  
17  
18  
19  
20  
21  
22  
23  
24  
25  
26  
27  
28  
29  
30  
31  
32  
33  
34  
35  
36  
37  
38  
39  
40  
41  
42  
43  
44  
45  
46  
47

| Section/topic                      | #  | Checklist item                                                                                                                                                                                                         | Reported on page # |
|------------------------------------|----|------------------------------------------------------------------------------------------------------------------------------------------------------------------------------------------------------------------------|--------------------|
| Study selection                    | 9  | State the process for selecting studies (i.e., screening, eligibility, included in systematic review, and, if applicable, included in the meta-analysis).                                                              | 6                  |
| Data collection process            | 10 | Describe method of data extraction from reports (e.g., piloted forms, independently, in duplicate) and any processes for obtaining and confirming data from investigators.                                             | 6                  |
| Data items                         | 11 | List and define all variables for which data were sought (e.g., PICOS, funding sources) and any assumptions and simplifications made.                                                                                  | 6                  |
| Risk of bias in individual studies | 12 | Describe methods used for assessing risk of bias of individual studies (including specification of whether this was done at the study or outcome level), and how this information is to be used in any data synthesis. | 6                  |
| Summary measures                   | 13 | State the principal summary measures (e.g., risk ratio, difference in means).                                                                                                                                          | 7                  |
| Synthesis of results               | 14 | Describe the methods of handling data and combining results of studies, if done, including measures of consistency (e.g., $I^2$ ) for each meta-analysis.                                                              | 7                  |
| Risk of bias across studies        | 15 | Specify any assessment of risk of bias that may affect the cumulative evidence (e.g., publication bias, selective reporting within studies).                                                                           | 7                  |
| Additional analyses                | 16 | Describe methods of additional analyses (e.g., sensitivity or subgroup analyses, meta-regression), if done, indicating which were pre-specified.                                                                       | 7                  |
| <b>RESULTS</b>                     |    |                                                                                                                                                                                                                        |                    |
| Study selection                    | 17 | Give numbers of studies screened, assessed for eligibility, and included in the review, with reasons for exclusions at each stage, ideally with a flow diagram.                                                        | 8                  |
| Study characteristics              | 18 | For each study, present characteristics for which data were extracted (e.g., study size, PICOS, follow-up period) and provide the citations.                                                                           | 8                  |
| Risk of bias within studies        | 19 | Present data on risk of bias of each study and, if available, any outcome-level assessment (see Item 12).                                                                                                              | 8                  |
| Results of individual studies      | 20 | For all outcomes considered (benefits or harms), present, for each study: (a) simple summary data for each intervention group and (b) effect estimates and confidence intervals, ideally with a forest plot.           | 9-10               |



1  
2  
3  
4  
5  
6  
7  
8  
9  
10  
11  
12  
13  
14  
15  
16  
17  
18  
19  
20  
21  
22  
23  
24  
25  
26  
27  
28  
29  
30  
31  
32  
33  
34  
35  
36  
37  
38  
39  
40  
41  
42  
43  
44  
45  
46  
47

| Section/topic               | #  | Checklist item                                                                                                                                                                        | Reported on page # |
|-----------------------------|----|---------------------------------------------------------------------------------------------------------------------------------------------------------------------------------------|--------------------|
| Synthesis of results        | 21 | Present results of each meta-analysis done, including confidence intervals and measures of consistency.                                                                               | 9-10               |
| Risk of bias across studies | 22 | Present results of any assessment of risk of bias across studies (see Item 15).                                                                                                       | 8                  |
| Additional analysis         | 23 | Give results of additional analyses, if done (e.g., sensitivity or subgroup analyses, meta-regression [see Item 16]).                                                                 | 8-10               |
| <b>DISCUSSION</b>           |    |                                                                                                                                                                                       |                    |
| Summary of evidence         | 24 | Summarize the main findings including the strength of evidence for each main outcome; consider their relevance to key groups (e.g., health care providers, users, and policy makers). | 10-12              |
| Limitations                 | 25 | Discuss limitations at study and outcome level (e.g., risk of bias), and at review level (e.g., incomplete retrieval of identified research, reporting bias).                         | 12                 |
| Conclusions                 | 26 | Provide a general interpretation of the results in the context of other evidence, and implications for future research.                                                               | 13                 |
| <b>FUNDING</b>              |    |                                                                                                                                                                                       |                    |
| Funding                     | 27 | Describe sources of funding for the systematic review and other support (e.g., supply of data); role of funders for the systematic review.                                            | 13                 |

## Supplementary Table 2. Search Strategy for Each Database

| Database | Search strategy                                                                                                                                |
|----------|------------------------------------------------------------------------------------------------------------------------------------------------|
| Pubmed   | #1 "calcium"[MeSH Terms] OR "calcium"[All Fields]                                                                                              |
|          | #2 "vitamin d"[MeSH Terms] OR "vitamin d"[All Fields] OR<br>"ergocalciferols"[MeSH Terms] OR "ergocalciferols"[All Fields]                     |
|          | #3 "fractures, bone"[MeSH Terms] OR ("fractures"[All Fields] AND "bone"[All Fields]) OR "bone fractures"[All Fields] OR "fracture"[All Fields] |
|          | #4 #1 or #2                                                                                                                                    |
|          | #5 #3 and #4                                                                                                                                   |

| Source                                       | Intervention                                                                                                                                   | Women,<br>No. (%)    | Mean Age, y     | Previous<br>Fracture | Calcium Intake,<br>mg/d | Baseline 25OHD,<br>ng/mL | Treatment<br>Duration |
|----------------------------------------------|------------------------------------------------------------------------------------------------------------------------------------------------|----------------------|-----------------|----------------------|-------------------------|--------------------------|-----------------------|
| Avenell et al, 2004<br>(United Kingdom)      | Calcium(1 g/d) (n = 29)<br>No treatment (n = 35)                                                                                               | NA <sup>a</sup> (83) | 78 <sup>b</sup> | Yes                  | NA                      | NA                       | 3.8 y                 |
|                                              | D <sub>3</sub> ( 800IU/d) (n = 35)<br>No treatment (n = 35)                                                                                    | NA <sup>a</sup> (83) | 78 <sup>b</sup> | Yes                  | NA                      | NA                       | 3.8 y                 |
|                                              | Calcium (1g/d) + D <sub>3</sub><br>(800IU/d) (n = 35)<br>No treatment (n = 35)                                                                 | NA <sup>a</sup> (83) | 78 <sup>b</sup> | Yes                  | NA                      | NA                       | 3.8 y                 |
| Baron et al, 1999<br>(United States)         | Calcium: 1.2 g/d (n = 464)<br>Placebo (n = 466)                                                                                                | 258 (28)             | 61.0            | NA                   | 877                     | NA                       | 4 y                   |
| Dawson-Hughes et al,<br>1997 (United States) | Calcium (0.5g/d) + D <sub>3</sub><br>(700IU/d) (n = 187)<br>Placebo (n = 202)                                                                  | 213 (54)             | 71.1            | NA                   | 729                     | 29.6 <sup>e</sup>        | 3 y                   |
| Grant et al, 2005<br>(United Kingdom)        | Calcium(1 g/d) (n = 1311)<br>Placebo (n = 1332)                                                                                                | 2241 (85)            | 77              | Yes                  | NA                      | 15.2 <sup>e,f</sup>      | 2-5 y                 |
|                                              | D <sub>3</sub> ( 800IU/d) (n = 1343)<br>Placebo (n = 1332)                                                                                     | 2264 (85)            | 77              | Yes                  | NA                      | 15.2 <sup>e,f</sup>      | 2-5 y                 |
|                                              | Calcium (1g/d) + D <sub>3</sub><br>(800IU/d) (n = 1306)<br>Placebo (n = 1332)                                                                  | 2232 (85)            | 77.5            | Yes                  | NA                      | 15.2 <sup>e,f</sup>      | 2-5 y                 |
| Hansson and Roos,<br>1987 (Sweden)           | Calcium (1g/d) (n = 25)<br>Placebo (n = 25)                                                                                                    | 50 (100)             | 65.9            | Yes                  | NA                      | NA                       | 3 y                   |
| Harwood et al, 2004<br>(United Kingdom)      | D <sub>3</sub> (300000 IU once) (n = 38)<br>No treatment (n = 37)                                                                              | 75 (100)             | 80.5            | Yes                  | NA                      | 11.6                     | 1 y                   |
|                                              | Calcium (1g/d) + D <sub>2</sub><br>(300000 IU once) (n = 36)<br>Calcium (1g/d) + D <sub>3</sub><br>(800IU/d) (n = 39)<br>No treatment (n = 37) | 112 (100)            | 81.7            | Yes                  | NA                      | 11.9                     | 1 y                   |
| Hin et al, 2017<br>(United Kingdom)          | D <sub>3</sub> (4000 IU/d)(n = 102)<br>D <sub>3</sub> (2000 IU/d)(n = 102)<br>Placebo (n = 101)                                                | 150 (49)             | 71.7            | Partial <sup>c</sup> | 710                     | 20.1                     | 1 y                   |
| Jackson et al, 2006<br>(United States)       | Calcium (1g/d) + D <sub>3</sub> (400<br>IU/d) (n = 4015)                                                                                       | 7972 (100)           | 62.4            | Partial <sup>c</sup> | 1151                    | 18.9 <sup>e</sup>        | 7 y                   |

|    |                       |                                        |            |      |                      |      |                   |
|----|-----------------------|----------------------------------------|------------|------|----------------------|------|-------------------|
| 1  |                       |                                        |            |      |                      |      |                   |
| 2  |                       |                                        |            |      |                      |      |                   |
| 3  |                       | Placebo (n = 3957)                     |            |      |                      |      |                   |
| 4  |                       |                                        |            |      |                      |      |                   |
| 5  | Lips et al, 1996      | 400 IU/d (n = 1291)                    | 1916 (74)  | 80.0 | No hip fracture      | 868  | 10.6 <sup>e</sup> |
| 6  |                       |                                        |            |      |                      |      | 3-4 y             |
| 7  | The Netherlands)      | Placebo (n = 1287)                     |            |      |                      |      |                   |
| 8  |                       |                                        |            |      |                      |      |                   |
| 9  | Liu et al, 2015       | Calcium (1.5g/d) + D <sub>3</sub> (600 | 98 (100)   | 62.1 | No                   | 1500 | NA                |
| 10 | China)                | IU/d) (n = 50)                         |            |      |                      |      | 1 y               |
| 11 |                       | Placebo (n = 48)                       |            |      |                      |      |                   |
| 12 |                       |                                        |            |      |                      |      |                   |
| 13 | Mitri et al, 2011     | D <sub>3</sub> (2000 IU/d)(n = 23)     | 25 (53)    | 58.0 | NA                   | 926  | 25.3              |
| 14 |                       |                                        |            |      |                      |      | 4 mo              |
| 15 | United States)        | Placebo (n = 24)                       |            |      |                      |      |                   |
| 16 |                       |                                        |            |      |                      |      |                   |
| 17 | Peacock et al, 2000   | Calcium (0.75g/d) (n = 126)            | 187 (72)   | 73.8 | Partial <sup>c</sup> | 597  | 25.0              |
| 18 |                       |                                        |            |      |                      |      | 4 y               |
| 19 | United States)        | Placebo (n = 135)                      |            |      |                      |      |                   |
| 20 |                       |                                        |            |      |                      |      |                   |
| 21 | Porthouse et al, 2005 | Calcium (1g/d) + D <sub>3</sub> (800   | 3314 (100) | 76.8 | Partial <sup>c</sup> | 1080 | NA                |
| 22 |                       |                                        |            |      |                      |      | 1.5-3.5 y         |
| 23 | United Kingdom)       | IU/d) (n = 1321)                       |            |      |                      |      |                   |
| 24 |                       | No treatment (n = 1993)                |            |      |                      |      |                   |
| 25 |                       |                                        |            |      |                      |      |                   |
| 26 | Prince et al, 2006    | Calcium (0.48g/d) (n = 730)            | 1460 (100) | 75.2 | Partial <sup>c</sup> | 915  | 31.0 <sup>e</sup> |
| 27 |                       |                                        |            |      |                      |      | 5 y               |
| 28 | Australia)            | Placebo (n = 730)                      |            |      |                      |      |                   |
| 29 |                       |                                        |            |      |                      |      |                   |
| 30 | Recker et al, 1996    | Calcium (1.2 g/d) (n = 95)             | 197 (100)  | 73.5 | Partial <sup>c</sup> | 434  | 25.5 <sup>e</sup> |
| 31 |                       |                                        |            |      |                      |      | 4 y               |
| 32 | United States)        | Placebo (n = 102)                      |            |      |                      |      |                   |
| 33 |                       |                                        |            |      |                      |      |                   |
| 34 | Reid et al, 1993      | Calcium (1 g/d) (n = 68)               | 135 (100)  | 58   | No vertebral         | 750  | 37.5              |
| 35 |                       |                                        |            |      |                      |      | 4 y               |
| 36 | New Zealand)          | Placebo (n = 67)                       |            |      | fracture             |      |                   |
| 37 |                       |                                        |            |      |                      |      |                   |
| 38 | Reid et al, 2006      | Calcium (1 g/d) (n = 732)              | 1471 (100) | 74.3 | Partial <sup>c</sup> | 857  | 20.7              |
| 39 |                       |                                        |            |      |                      |      | 5 y               |
| 40 | New Zealand)          | Placebo (n = 739)                      |            |      |                      |      |                   |
| 41 |                       |                                        |            |      |                      |      |                   |
| 42 | Higgs et al, 1998     | Calcium (1.6 g/d) (n = 119)            | 236 (100)  | 66.2 | No                   | 714  | 30.1              |
| 43 |                       |                                        |            |      |                      |      | 4 y               |
| 44 | United States)        | Placebo (n = 117)                      |            |      |                      |      |                   |
| 45 |                       |                                        |            |      |                      |      |                   |
| 46 |                       |                                        |            |      |                      |      |                   |
| 47 |                       |                                        |            |      |                      |      |                   |
| 48 |                       |                                        |            |      |                      |      |                   |
| 49 |                       |                                        |            |      |                      |      |                   |
| 50 |                       |                                        |            |      |                      |      |                   |
| 51 |                       |                                        |            |      |                      |      |                   |
| 52 |                       |                                        |            |      |                      |      |                   |
| 53 |                       |                                        |            |      |                      |      |                   |
| 54 |                       |                                        |            |      |                      |      |                   |
| 55 |                       |                                        |            |      |                      |      |                   |
| 56 |                       |                                        |            |      |                      |      |                   |
| 57 |                       |                                        |            |      |                      |      |                   |
| 58 |                       |                                        |            |      |                      |      |                   |
| 59 |                       |                                        |            |      |                      |      |                   |
| 60 |                       |                                        |            |      |                      |      |                   |

1  
2  
3  
4  
5  
6  
7  
8  
9  
10  
11  
12  
13  
14  
15  
16  
17  
18  
19  
20  
21  
22  
23  
24  
25  
26  
27  
28  
29  
30  
31  
32  
33  
34  
35  
36  
37  
38  
39  
40  
41  
42  
43  
44  
45  
46  
47  
48  
49  
50  
51  
52  
53  
54  
55  
56  
57  
58  
59  
60

|                                        |                                                                             |           |      |                      |      |      |     |
|----------------------------------------|-----------------------------------------------------------------------------|-----------|------|----------------------|------|------|-----|
| (Finland)                              | Placebo (n = 102)                                                           |           |      |                      |      |      |     |
| Witham et al, 2013<br>(United Kingdom) | D <sub>3</sub> (100000 IU every 3 mo)<br>(n = 80)<br>Placebo (n = 79)       | 77 (49)   | 76.8 | NA                   | 1125 | 18.0 | 1 y |
| Xue et al, 2017<br>(China)             | Calcium (0.6g/d) + D <sub>3</sub> (800 IU/d) (n = 139)<br>Placebo (n = 173) | 312 (100) | 63.6 | Partial <sup>c</sup> | NA   | 30.8 | 1 y |

Abbreviation: 25OHD, 25-hydroxyvitamin D; NA, not available

<sup>a</sup> Women accounted for 83% of total participants in this trial, but detailed data not available for each group.

<sup>b</sup> Mean age is 78 y for total participants in this trial, but detailed data not available for each group.

<sup>c</sup> This trial reported partial participants with fracture history.

<sup>d</sup> Partial participants were assessed for dietary calcium intake.

<sup>e</sup> Partial participants received measurement of baseline 25OHD concentrations.

<sup>f</sup> The RECORD trial reported that the mean baseline 25OHD concentrations for a sample of 60 participants was 15.2 ng/mL, but detailed data were not available for each group.

**supplementary Table 3.** The characteristics of the included studies.

| Source                                              | Treatment |                                                              | No. of Participants |              |                    |
|-----------------------------------------------------|-----------|--------------------------------------------------------------|---------------------|--------------|--------------------|
|                                                     | Duration  | Intervention                                                 | Total Fracture      | Hip fracture | Vertebral Fracture |
| <b>Avenell et al, 2004</b><br>(United Kingdom)      | 3.8 y     | Calcium(1 g/d) (n = 29)                                      | 4                   | 1            | 0                  |
|                                                     |           | D <sub>3</sub> ( 800IU/d) (n = 35)                           | 3                   | 0            | 0                  |
|                                                     |           | Calcium (1g/d) + D <sub>3</sub><br>(800IU/d) (n = 35)        | 2                   | 1            | 0                  |
|                                                     |           | No treatment (n = 35)                                        | 4                   | 1            | 1                  |
| <b>Baron et al, 1999</b><br>(United States)         | 4 y       | Calcium: 1.2 g/d (n = 464)                                   | 4                   | 1            |                    |
|                                                     |           | Placebo (n = 466)                                            | 14                  | 0            |                    |
| <b>Dawson-Hughes et al, 1997</b><br>(United States) | 3 y       | Calcium (0.5g/d) + D <sub>3</sub><br>(700IU/d) (n = 187)     |                     | 0            |                    |
|                                                     |           | Placebo (n = 202)                                            |                     | 1            |                    |
| <b>Grant et al, 2005</b><br>(United Kingdom)        | 2-5 y     | Calcium(1 g/d) (n = 1311)                                    | 166                 | 49           | 3                  |
|                                                     |           | D <sub>3</sub> ( 800IU/d) (n = 1343)                         | 188                 | 47           | 4                  |
|                                                     |           | Calcium (1g/d) + D <sub>3</sub><br>(800IU/d) (n = 1306)      | 165                 | 46           | 0                  |
|                                                     |           | Placebo (n = 1332)                                           | 179                 | 41           | 1                  |
| <b>Hansson and Roos, 1987</b><br>(Sweden)           | 3 y       | Calcium (1g/d) (n = 25)                                      |                     |              | 1                  |
|                                                     |           | Placebo (n = 25)                                             |                     |              | 1                  |
| <b>Harwood et al, 2004</b><br>(United Kingdom)      | 1 y       | D <sub>3</sub> (300000 IU once) (n = 38)                     | 0                   | 0            |                    |
|                                                     |           | Calcium (1g/d) + D <sub>2</sub><br>(300000 IU once) (n = 36) | 6                   | 1            |                    |
|                                                     |           | Calcium (1g/d) + D <sub>3</sub><br>(800IU/d) (n = 39)        |                     |              |                    |
|                                                     |           | No treatment (n = 37)                                        | 5                   | 1            |                    |
| <b>Hin et al, 2017</b><br>(United Kingdom)          | 1 y       | D <sub>3</sub> (4000 IU/d)(n = 102)                          | 6                   |              |                    |
|                                                     |           | D <sub>3</sub> (2000 IU/d)(n = 102)                          |                     |              |                    |
|                                                     |           | Placebo (n = 101)                                            | 1                   |              |                    |
| <b>Jackson et al, 2006</b><br>(United States)       | 7 y       | Calcium (1g/d) + D <sub>3</sub> (400<br>IU/d) (n = 4015)     |                     | 70           |                    |
|                                                     |           | Placebo (n = 3957)                                           |                     | 61           |                    |

|                              |           |                                                       |     |    |    |
|------------------------------|-----------|-------------------------------------------------------|-----|----|----|
| <b>Lips et al, 1996</b>      | 3-4 y     | 400 IU/d (n = 1291)                                   | 135 | 58 |    |
| <b>(The Netherlands)</b>     |           | Placebo (n = 1287)                                    | 122 | 48 |    |
| <b>Liu et al, 2015</b>       | 1 y       | Calcium (1.5g/d) + D <sub>3</sub> (600 IU/d) (n = 50) | 1   |    |    |
| <b>(China)</b>               |           | Placebo (n = 48)                                      | 2   |    |    |
| <b>Mitri et al, 2011</b>     | 4 mo      | D <sub>3</sub> (2000 IU/d)(n = 23)                    | 1   |    |    |
| <b>(United States)</b>       |           | Placebo (n = 24)                                      | 0   |    |    |
| <b>Peacock et al, 2000</b>   | 4 y       | Calcium (0.75g/d) (n = 126)                           |     |    | 7  |
| <b>(United States)</b>       |           | Placebo (n = 135)                                     |     |    | 13 |
| <b>Porthouse et al, 2005</b> | 1.5-3.5 y | Calcium (1g/d) + D <sub>3</sub> (800 IU/d) (n = 1321) | 58  | 8  |    |
| <b>(United Kingdom)</b>      |           | No treatment (n = 1993)                               | 91  | 17 |    |
| <b>Prince et al, 2006</b>    | 5 y       | Calcium (0.48g/d) (n = 730)                           | 110 | 11 | 38 |
| <b>(Australia)</b>           |           | Placebo (n = 730)                                     | 126 | 6  | 39 |
| <b>Recker et al, 1996</b>    | 4 y       | Calcium (1.2 g/d) (n = 95)                            |     |    | 27 |
| <b>(United States)</b>       |           | Placebo (n = 102)                                     |     |    | 34 |
| <b>Reid et al, 1993</b>      | 4 y       | Calcium (1 g/d) (n = 68)                              | 2   | 0  | 0  |
| <b>(New Zealand)</b>         |           | Placebo (n = 67)                                      | 7   | 2  | 1  |
| <b>Reid et al, 2006</b>      | 5 y       | Calcium (1 g/d) (n = 732)                             | 134 | 17 | 27 |
| <b>(New Zealand)</b>         |           | Placebo (n = 739)                                     | 147 | 5  | 38 |
| <b>Riggs et al, 1998</b>     | 4 y       | Calcium (1.6 g/d) (n = 119)                           |     |    | 8  |
| <b>(United States)</b>       |           | Placebo (n = 117)                                     |     |    | 9  |
| <b>Salovaara et al, 2010</b> | 3 y       | Calcium(1g/d) + D <sub>3</sub> (800 IU/d) (n = 1718)  | 78  | 4  | 9  |
| <b>(Finland)</b>             |           | No treatment (n = 1714)                               | 94  | 2  | 13 |
| <b>Sanders et al, 2010</b>   | 3-5 y     | D <sub>3</sub> (500000 IU every year) (n = 1131)      | 155 | 19 | 35 |
| <b>(Australia)</b>           |           | Placebo (n = 1127)                                    | 125 | 15 | 28 |
| <b>Smith et al, 2007</b>     | 3 y       | D <sub>3</sub> (300000 IU every year) (n = 4727)      |     | 66 |    |
| <b>(United Kingdom)</b>      |           | Placebo (n = 4713)                                    |     | 44 |    |
| <b>Trivedi et al, 2003</b>   | 5 y       | D <sub>3</sub> (100000 IU every 4 mo) (n = 1345)      | 119 | 21 | 18 |
| <b>(United Kingdom)</b>      |           | Placebo (n = 1341)                                    | 149 | 24 | 28 |

|                              |     |                                        |   |   |
|------------------------------|-----|----------------------------------------|---|---|
| <b>Uusi-Rasi et al, 2015</b> | 2 y | D <sub>3</sub> (800 IU/d) (n = 102)    | 6 | 2 |
| <b>(Finland)</b>             |     | Placebo (n = 102)                      | 6 | 0 |
| <b>Witham et al, 2013</b>    | 1 y | D <sub>3</sub> (100000 IU every 3 mo)  | 2 |   |
| <b>(United Kingdom)</b>      |     | (n = 80)                               |   |   |
|                              |     | Placebo (n = 79)                       | 3 |   |
| <b>Xue et al, 2017</b>       | 1 y | Calcium (0.6g/d) + D <sub>3</sub> (800 | 3 |   |
| <b>(China)</b>               |     | IU/d) (n = 139)                        |   |   |
|                              |     | Placebo (n = 173)                      | 2 |   |

**Supplementary Table 4.** The detailed data of outcomes



1  
2  
3  
4  
5  
6  
7  
8  
9  
10  
11  
12  
13  
14  
15  
16  
17  
18  
19  
20  
21  
22  
23  
24  
25  
26  
27  
28  
29  
30  
31  
32  
33  
34  
35  
36  
37  
38  
39  
40  
41  
42  
43  
44  
45  
46  
47  
48  
49  
50  
51  
52  
53  
54  
55  
56  
57  
58  
59  
60



1  
2  
3  
4  
5  
6  
7  
8  
9  
10  
11  
12  
13  
14  
15  
16  
17  
18  
19  
20  
21  
22  
23  
24  
25  
26  
27  
28  
29  
30  
31  
32  
33  
34  
35  
36  
37  
38  
39  
40  
41  
42  
43  
44  
45  
46  
47  
48  
49  
50  
51  
52  
53  
54  
55  
56  
57  
58  
59  
60

|                           | Random sequence generation (selection bias) | Allocation concealment (selection bias) | Blinding of participants and personnel (performance bias) | Blinding of outcome assessment (detection bias) | Incomplete outcome data (attrition bias) | Selective reporting (reporting bias) | Other bias |
|---------------------------|---------------------------------------------|-----------------------------------------|-----------------------------------------------------------|-------------------------------------------------|------------------------------------------|--------------------------------------|------------|
| Avenell et al, 2004       | +                                           | +                                       | ?                                                         | +                                               | -                                        | ?                                    | ?          |
| Baron et al, 1999         | +                                           | ?                                       | +                                                         | +                                               | +                                        | ?                                    | +          |
| Dawson-Hughes et al, 1997 | ?                                           | ?                                       | +                                                         | +                                               | ?                                        | ?                                    | ?          |
| Grant et al, 2005         | +                                           | +                                       | ?                                                         | +                                               | ?                                        | +                                    | +          |
| Hansson and Roos, 1987    | ?                                           | ?                                       | ?                                                         | ?                                               | ?                                        | ?                                    | ?          |
| Harwood et al, 2004       | +                                           | +                                       | -                                                         | -                                               | -                                        | ?                                    | ?          |
| Hin et al, 2017           | +                                           | ?                                       | +                                                         | +                                               | +                                        | +                                    | +          |
| Jackson et al, 2006       | ?                                           | ?                                       | +                                                         | +                                               | +                                        | ?                                    | +          |
| Lips et al, 1996          | +                                           | +                                       | +                                                         | ?                                               | -                                        | ?                                    | +          |
| Liu et al, 2015           | ?                                           | ?                                       | -                                                         | ?                                               | +                                        | ?                                    | +          |
| Mitri et al, 2011         | +                                           | ?                                       | +                                                         | ?                                               | +                                        | ?                                    | -          |
| Peacock et al, 2000       | ?                                           | ?                                       | +                                                         | ?                                               | -                                        | ?                                    | ?          |
| Porthouse et al, 2005     | ?                                           | +                                       | -                                                         | -                                               | +                                        | ?                                    | +          |
| Prince et al, 2006        | +                                           | +                                       | +                                                         | ?                                               | +                                        | ?                                    | +          |
| Recker et al, 1996        | ?                                           | ?                                       | +                                                         | +                                               | -                                        | ?                                    | ?          |
| Reid et al, 1993          | ?                                           | ?                                       | +                                                         | ?                                               | ?                                        | ?                                    | +          |
| Reid et al, 2006          | ?                                           | +                                       | +                                                         | ?                                               | ?                                        | ?                                    | +          |
| Riggs et al, 1998         | ?                                           | ?                                       | +                                                         | ?                                               | -                                        | ?                                    | ?          |
| Salovaara et al, 2010     | +                                           | ?                                       | -                                                         | ?                                               | +                                        | ?                                    | ?          |
| Sanders et al, 2010       | +                                           | +                                       | +                                                         | +                                               | +                                        | ?                                    | +          |
| Smith et al, 2007         | ?                                           | +                                       | +                                                         | +                                               | -                                        | ?                                    | +          |
| Trivedi et al, 2003       | ?                                           | +                                       | +                                                         | +                                               | -                                        | ?                                    | +          |
| Uusi-Rasi et al, 2015     | +                                           | ?                                       | +                                                         | ?                                               | +                                        | +                                    | +          |
| Witham et al, 2013        | +                                           | +                                       | +                                                         | +                                               | ?                                        | +                                    | +          |
| Xue et al, 2017           | +                                           | ?                                       | ?                                                         | ?                                               | +                                        | ?                                    | ?          |

1  
2  
3  
4  
5  
6  
7  
8  
9  
10  
11  
12  
13  
14  
15  
16  
17  
18  
19  
20  
21  
22  
23  
24  
25  
26  
27  
28  
29  
30  
31  
32  
33  
34  
35  
36  
37  
38  
39  
40  
41  
42  
43  
44  
45  
46  
47  
48  
49  
50  
51  
52  
53  
54  
55  
56  
57  
58  
59  
60





1  
2  
3  
4  
5  
6  
7  
8  
9  
10  
11  
12  
13  
14  
15  
16  
17  
18  
19  
20  
21  
22  
23  
24  
25  
26  
27  
28  
29  
30  
31  
32  
33  
34  
35  
36  
37  
38  
39  
40  
41  
42  
43  
44  
45  
46  
47  
48  
49  
50  
51  
52  
53  
54  
55  
56  
57  
58  
59  
60



1  
2  
3  
4  
5  
6  
7  
8  
9  
10  
11  
12  
13  
14  
15  
16  
17  
18  
19  
20  
21  
22  
23  
24  
25  
26  
27  
28  
29  
30  
31  
32  
33  
34  
35  
36  
37  
38  
39  
40  
41  
42  
43  
44  
45  
46  
47  
48  
49  
50  
51  
52  
53  
54  
55  
56  
57  
58  
59  
60



1  
2  
3  
4  
5  
6  
7  
8  
9  
10  
11  
12  
13  
14  
15  
16  
17  
18  
19  
20  
21  
22  
23  
24  
25  
26  
27  
28  
29  
30  
31  
32  
33  
34  
35  
36  
37  
38  
39  
40  
41  
42  
43  
44  
45  
46  
47  
48  
49  
50  
51  
52  
53  
54  
55  
56  
57  
58  
59  
60



1  
2  
3  
4  
5  
6  
7  
8  
9  
10  
11  
12  
13  
14  
15  
16  
17  
18  
19  
20  
21  
22  
23  
24  
25  
26  
27  
28  
29  
30  
31  
32  
33  
34  
35  
36  
37  
38  
39  
40  
41  
42  
43  
44  
45  
46  
47  
48  
49  
50  
51  
52  
53  
54  
55  
56  
57  
58  
59  
60



\*\*\* Loop(s) [A-A+C-C] are formed only by multi-arm trial(s) – Consistent by definition



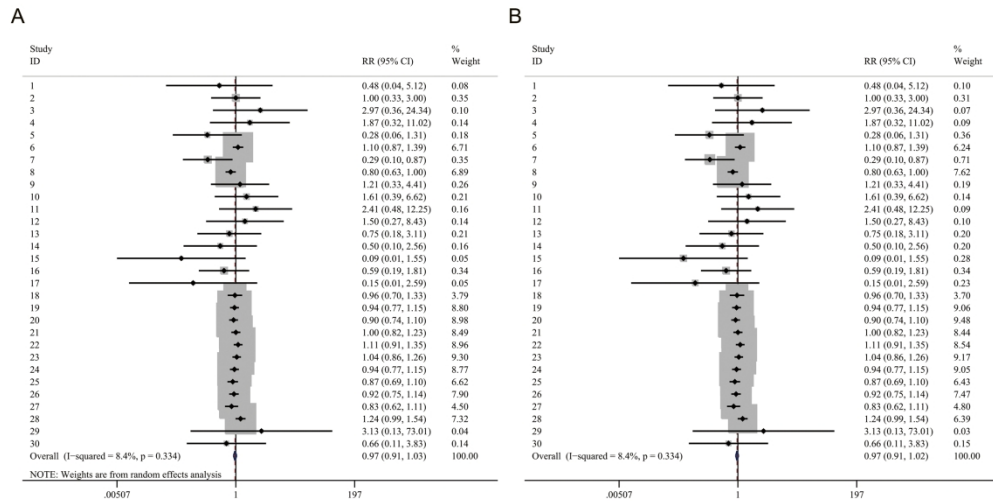

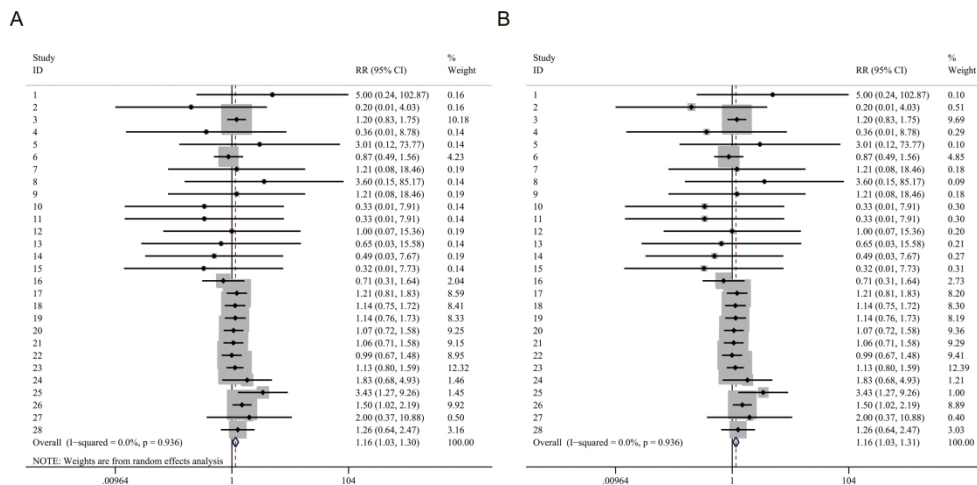

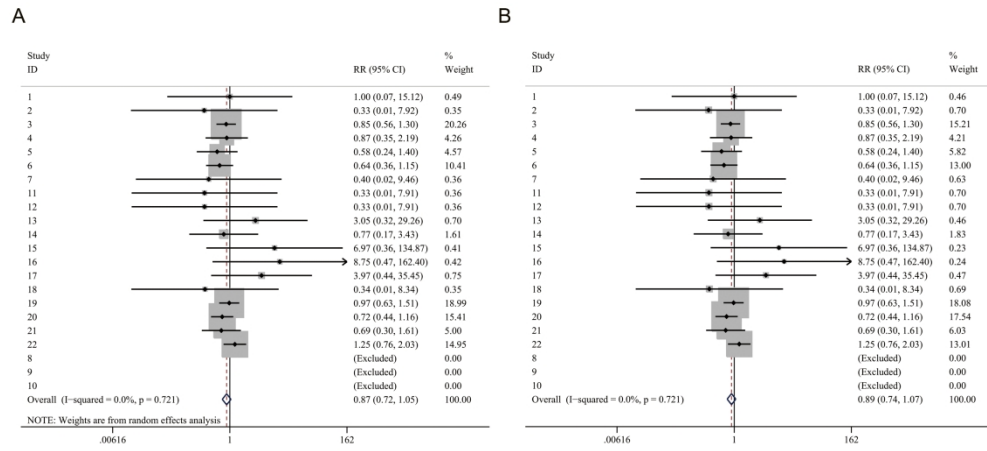

Supplement: bmjopen-2018-024595.draft_revisions.pdf [file bmjopen-2018-024595.draft_revisions.pdf]
