# Supplementary material for: Comparison of fracture risk using different supplemental doses of vitamin D, calcium or their combination: a network meta-analysis of randomised controlled trials
Source: PubMed Central journal article supplement — BMJ Open. 2019 Oct 16;9(10):e024595. doi: 10.1136/bmjopen-2018-024595 (PMC6797303; doi:10.1136/bmjopen-2018-024595), 2019-10-16
Supplement: bmjopen-2018-024595supp002.pdf [file bmjopen-2018-024595supp002.pdf]

|                           | Random sequ | Allocation con | Blinding of pai | Blinding of ou | Incomplete ou | Selective repr | Other bias |
|---------------------------|-------------|----------------|-----------------|----------------|---------------|----------------|------------|
| Avenell et al, 2004       | +           | +              | ?               | +              | -             | ?              | ?          |
| Baron et al, 1999         | +           | ?              | +               | +              | +             | ?              | +          |
| Dawson-Hughes et al, 1997 | ?           | ?              | +               | +              | ?             | ?              | ?          |
| Grant et al, 2005         | +           | +              | ?               | +              | ?             | +              | +          |
| Hansson and Roos, 1987    | ?           | ?              | ?               | ?              | ?             | ?              | ?          |
| Harwood et al, 2004       | +           | +              | -               | -              | -             | ?              | ?          |
| Hin et al, 2017           | +           | ?              | +               | +              | +             | +              | +          |
| Jackson et al, 2006       | ?           | ?              | +               | +              | +             | ?              | +          |
| Lips et al, 1996          | +           | +              | +               | ?              | -             | ?              | +          |
| Liu et al, 2015           | ?           | ?              | -               | ?              | +             | ?              | +          |
| Mitri et al, 2011         | +           | ?              | +               | ?              | +             | ?              | -          |
| Peacock et al, 2000       | ?           | ?              | +               | ?              | -             | ?              | ?          |
| Porthouse et al, 2005     | ?           | +              | -               | -              | +             | ?              | +          |
| Prince et al, 2006        | +           | +              | +               | ?              | +             | ?              | +          |
| Recker et al, 1996        | ?           | ?              | +               | +              | -             | ?              | ?          |
| Reid et al, 1993          | ?           | ?              | +               | ?              | ?             | ?              | +          |
| Reid et al, 2006          | ?           | +              | +               | ?              | ?             | ?              | +          |
