# Supplementary material for: Comparison of fracture risk using different supplemental doses of vitamin D, calcium or their combination: a network meta-analysis of randomised controlled trials
Source: PubMed Central journal article supplement — BMJ Open. 2019 Oct 16;9(10):e024595. doi: 10.1136/bmjopen-2018-024595 (PMC6797303; doi:10.1136/bmjopen-2018-024595), 2019-10-16
Supplement: bmjopen-2018-024595supp008.pdf [file bmjopen-2018-024595supp008.pdf]

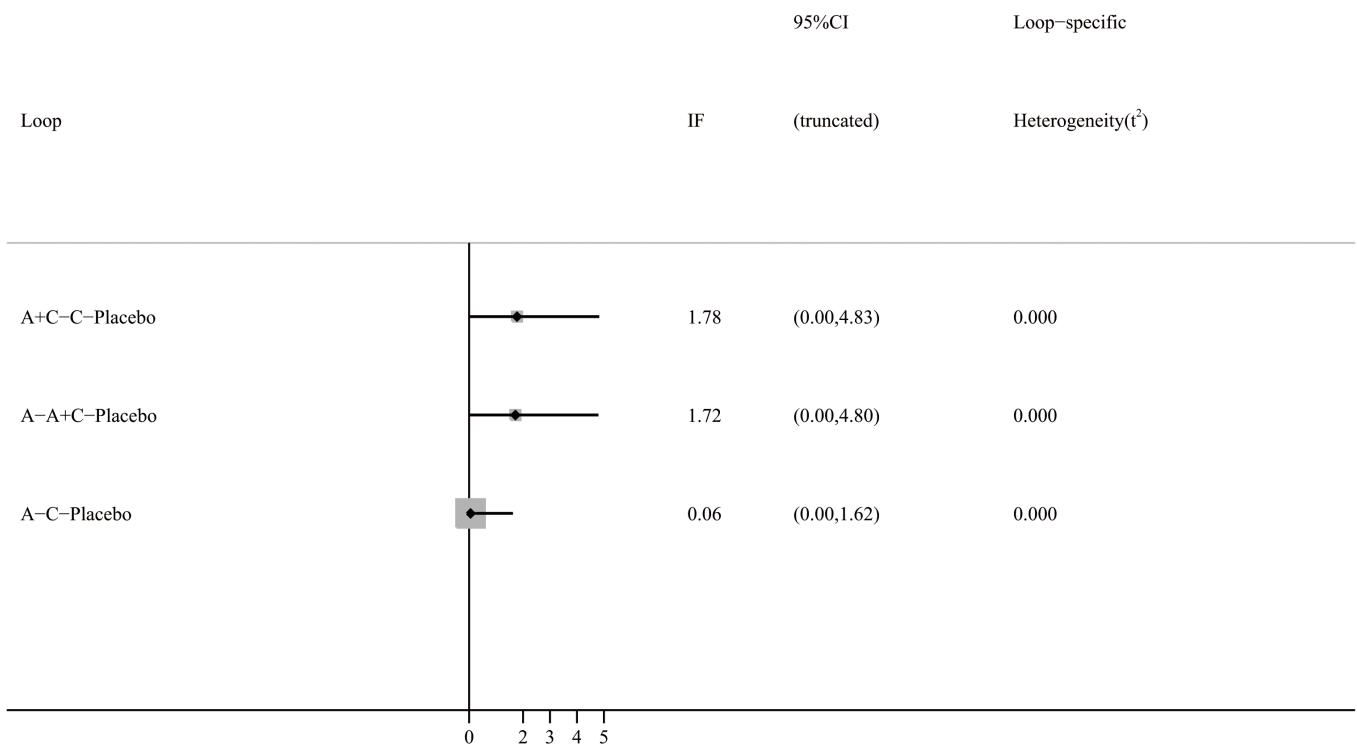

\*\*\* Loop(s) [A-A+C-C] are formed only by multi-arm trial(s) – Consistent by definition

O<sup>o</sup> „ 1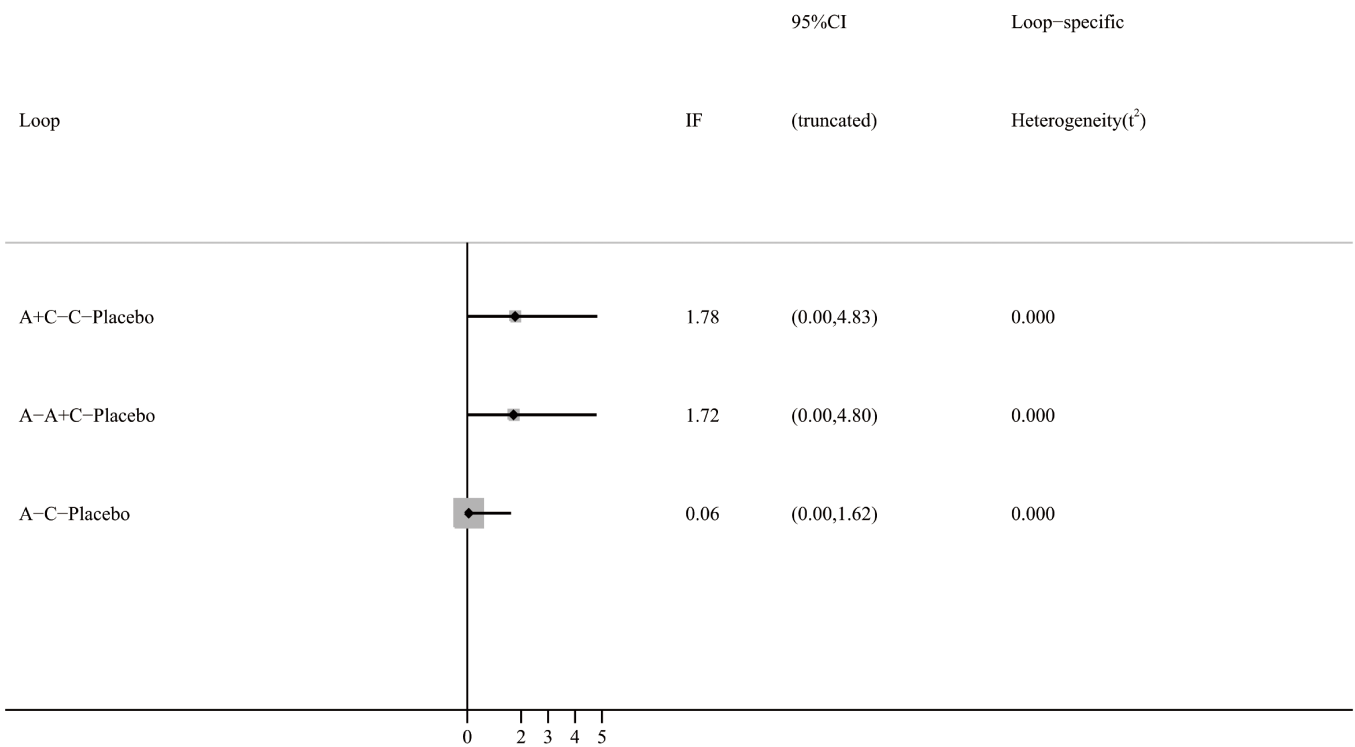

\*\*\* Loop(s) [A-A+C-C] are formed only by multi-arm trial(s) – Consistent by definition
