# Supplementary material for: Comparison of fracture risk using different supplemental doses of vitamin D, calcium or their combination: a network meta-analysis of randomised controlled trials
Source: PubMed Central journal article supplement — BMJ Open. 2019 Oct 16;9(10):e024595. doi: 10.1136/bmjopen-2018-024595 (PMC6797303; doi:10.1136/bmjopen-2018-024595), 2019-10-16
Supplement: bmjopen-2018-024595supp013.pdf [file bmjopen-2018-024595supp013.pdf]

**Supplementary Table 2. Search Strategy for Each Database**

---

| <b>Database</b> | <b>Search strategy</b>                                                                                                                                                                                                                                                                                                                                              |
|-----------------|---------------------------------------------------------------------------------------------------------------------------------------------------------------------------------------------------------------------------------------------------------------------------------------------------------------------------------------------------------------------|
| Pubmed          | #1 "calcium"[MeSH Terms] OR "calcium"[All Fields]<br>#2 "vitamin d"[MeSH Terms] OR "vitamin d"[All Fields] OR<br>"ergocalciferols"[MeSH Terms] OR "ergocalciferols"[All Fields]<br>#3 "fractures, bone"[MeSH Terms] OR ("fractures"[All Fields] AND "bone"[All<br>Fields]) OR "bone fractures"[All Fields] OR "fracture"[All Fields]<br>#4 #1 or #2<br>#5 #3 and #4 |

---
