# Supplementary material for: Comparison of fracture risk using different supplemental doses of vitamin D, calcium or their combination: a network meta-analysis of randomised controlled trials
Source: PubMed Central journal article supplement — BMJ Open. 2019 Oct 16;9(10):e024595. doi: 10.1136/bmjopen-2018-024595 (PMC6797303; doi:10.1136/bmjopen-2018-024595), 2019-10-16
Supplement: bmjopen-2018-024595supp014.pdf [file bmjopen-2018-024595supp014.pdf]

| Source                                       | Intervention                                                 | Women, No. (%)       | Mean Age, y     | Previous Fracture    | Calcium Intake, mg/d | Baseline 25OHD, ng/mL | Treatment Duration |
|----------------------------------------------|--------------------------------------------------------------|----------------------|-----------------|----------------------|----------------------|-----------------------|--------------------|
| Avenell et al, 2004<br>(United Kingdom)      | Calcium(1 g/d) (n = 29)                                      | NA <sup>a</sup> (83) | 78 <sup>b</sup> | Yes                  | NA                   | NA                    | 3.8 y              |
|                                              | No treatment (n = 35)                                        |                      |                 |                      |                      |                       |                    |
|                                              | D <sub>3</sub> ( 800IU/d) (n = 35)                           | NA <sup>a</sup> (83) | 78 <sup>b</sup> | Yes                  | NA                   | NA                    | 3.8 y              |
|                                              | No treatment (n = 35)                                        |                      |                 |                      |                      |                       |                    |
| Baron et al, 1999<br>(United States)         | Calcium: 1.2 g/d (n = 464)                                   | 258 (28)             | 61.0            | NA                   | 877                  | NA                    | 4 y                |
|                                              | Placebo (n = 466)                                            |                      |                 |                      |                      |                       |                    |
| Dawson-Hughes et al,<br>1997 (United States) | Calcium (0.5g/d) + D <sub>3</sub><br>(700IU/d) (n = 187)     | 213 (54)             | 71.1            | NA                   | 729                  | 29.6 <sup>e</sup>     | 3 y                |
|                                              | Placebo (n = 202)                                            |                      |                 |                      |                      |                       |                    |
| Grant et al, 2005<br>(United Kingdom)        | Calcium(1 g/d) (n = 1311)                                    | 2241 (85)            | 77              | Yes                  | NA                   | 15.2 <sup>e,f</sup>   | 2-5 y              |
|                                              | Placebo (n = 1332)                                           |                      |                 |                      |                      |                       |                    |
|                                              | D <sub>3</sub> ( 800IU/d) (n = 1343)                         | 2264 (85)            | 77              | Yes                  | NA                   | 15.2 <sup>e,f</sup>   | 2-5 y              |
|                                              | Placebo (n = 1332)                                           |                      |                 |                      |                      |                       |                    |
| Hansson and Roos,<br>1987 (Sweden)           | Calcium (1g/d) (n = 25)                                      | 50 (100)             | 65.9            | Yes                  | NA                   | NA                    | 3 y                |
|                                              | Placebo (n = 25)                                             |                      |                 |                      |                      |                       |                    |
| Harwood et al, 2004<br>(United Kingdom)      | D <sub>3</sub> (300000 IU once) (n = 38)                     | 75 (100)             | 80.5            | Yes                  | NA                   | 11.6                  | 1 y                |
|                                              | No treatment (n = 37)                                        |                      |                 |                      |                      |                       |                    |
|                                              | Calcium (1g/d) + D <sub>2</sub><br>(300000 IU once) (n = 36) | 112 (100)            | 81.7            | Yes                  | NA                   | 11.9                  | 1 y                |
|                                              | Calcium (1g/d) + D <sub>3</sub><br>(800IU/d) (n = 39)        |                      |                 |                      |                      |                       |                    |
| Hin et al, 2017<br>(United Kingdom)          | D <sub>3</sub> (4000 IU/d)(n = 102)                          | 150 (49)             | 71.7            | Partial <sup>c</sup> | 710                  | 20.1                  | 1 y                |
|                                              | D <sub>3</sub> (2000 IU/d)(n = 102)                          |                      |                 |                      |                      |                       |                    |
| Jackson et al, 2006<br>(United States)       | Placebo (n = 101)                                            |                      |                 |                      |                      |                       |                    |
|                                              | Calcium (1g/d) + D <sub>3</sub> (400<br>IU/d) (n = 4015)     | 7972 (100)           | 62.4            | Partial <sup>c</sup> | 1151                 | 18.9 <sup>e</sup>     | 7 y                |

|                                           |                                                                                  |            |      |                       |                  |                   |           |
|-------------------------------------------|----------------------------------------------------------------------------------|------------|------|-----------------------|------------------|-------------------|-----------|
|                                           | Placebo (n = 3957)                                                               |            |      |                       |                  |                   |           |
| Lips et al, 1996<br>(The Netherlands)     | 400 IU/d (n = 1291)<br>Placebo (n = 1287)                                        | 1916 (74)  | 80.0 | No hip fracture       | 868              | 10.6 <sup>e</sup> | 3-4 y     |
| Liu et al, 2015<br>(China)                | Calcium (1.5g/d) + D <sub>3</sub> (600 IU/d) (n = 50)<br>Placebo (n = 48)        | 98 (100)   | 62.1 | No                    | 1500             | NA                | 1 y       |
| Mitri et al, 2011<br>(United States)      | D <sub>3</sub> (2000 IU/d)(n = 23)<br>Placebo (n = 24)                           | 25 (53)    | 58.0 | NA                    | 926              | 25.3              | 4 mo      |
| Peacock et al, 2000<br>(United States)    | Calcium (0.75g/d) (n = 126)<br>Placebo (n = 135)                                 | 187 (72)   | 73.8 | Partial <sup>c</sup>  | 597              | 25.0              | 4 y       |
| Porthouse et al, 2005<br>(United Kingdom) | Calcium (1g/d) + D <sub>3</sub> (800 IU/d) (n = 1321)<br>No treatment (n = 1993) | 3314 (100) | 76.8 | Partial <sup>c</sup>  | 1080             | NA                | 1.5-3.5 y |
| Prince et al, 2006<br>(Australia)         | Calcium (0.48g/d) (n = 730)<br>Placebo (n = 730)                                 | 1460 (100) | 75.2 | Partial <sup>c</sup>  | 915              | 31.0 <sup>e</sup> | 5 y       |
| Recker et al, 1996<br>(United States)     | Calcium (1.2 g/d) (n = 95)<br>Placebo (n = 102)                                  | 197 (100)  | 73.5 | Partial <sup>c</sup>  | 434              | 25.5 <sup>e</sup> | 4 y       |
| Reid et al, 1993<br>(New Zealand)         | Calcium (1 g/d) (n = 68)<br>Placebo (n = 67)                                     | 135 (100)  | 58   | No vertebral fracture | 750              | 37.5              | 4 y       |
| Reid et al, 2006<br>(New Zealand)         | Calcium (1 g/d) (n = 732)<br>Placebo (n = 739)                                   | 1471 (100) | 74.3 | Partial <sup>c</sup>  | 857              | 20.7              | 5 y       |
| Riggs et al, 1998<br>(United States)      | Calcium (1.6 g/d) (n = 119)<br>Placebo (n = 117)                                 | 236 (100)  | 66.2 | No                    | 714              | 30.1              | 4 y       |
| Salovaara et al, 2010<br>(Finland)        | Calcium(1g/d) + D <sub>3</sub> (800 IU/d) (n = 1718)<br>No treatment (n = 1714)  | 3432 (100) | 67.3 | Partial <sup>c</sup>  | 957              | 19.8 <sup>e</sup> | 3 y       |
| Sanders et al, 2010<br>(Australia)        | D <sub>3</sub> (500000 IU every year) (n = 1131)<br>Placebo (n = 1127)           | 2258 (100) | 76.1 | Partial <sup>c</sup>  | 976              | 19.8 <sup>e</sup> | 3-5 y     |
| Smith et al, 2007<br>(United Kingdom)     | D <sub>3</sub> (300000 IU every year) (n = 4727)<br>Placebo (n = 4713)           | 5086 (54)  | 79.1 | Partial <sup>c</sup>  | 625 <sup>d</sup> | 22.6 <sup>e</sup> | 3 y       |
| Trivedi et al, 2003<br>(United Kingdom)   | D <sub>3</sub> (100000 IU every 4 mo) (n = 1345)<br>Placebo (n = 1341)           | 649 (24)   | 74.8 | NA                    | 742              | NA                | 5 y       |
| Uusi-Rasi et al, 2015                     | D <sub>3</sub> (800 IU/d) (n = 102)                                              | 204 (100)  | 73.9 | NA                    | 1082             | 26.7              | 2 y       |

|                                        |                                                                             |           |      |                      |      |      |     |
|----------------------------------------|-----------------------------------------------------------------------------|-----------|------|----------------------|------|------|-----|
| (Finland)                              | Placebo (n = 102)                                                           |           |      |                      |      |      |     |
| Witham et al, 2013<br>(United Kingdom) | D <sub>3</sub> (100000 IU every 3 mo)<br>(n = 80)<br>Placebo (n = 79)       | 77 (49)   | 76.8 | NA                   | 1125 | 18.0 | 1 y |
| Xue et al, 2017<br>(China)             | Calcium (0.6g/d) + D <sub>3</sub> (800 IU/d) (n = 139)<br>Placebo (n = 173) | 312 (100) | 63.6 | Partial <sup>c</sup> | NA   | 30.8 | 1 y |

Abbreviation: 25OHD, 25-hydroxyvitamin D; NA, not available

<sup>a</sup> Women accounted for 83% of total participants in this trial, but detailed data not available for each group.

<sup>b</sup> Mean age is 78 y for total participants in this trial, but detailed data not available for each group.

<sup>c</sup> This trial reported partial participants with fracture history.

<sup>d</sup> Partial participants were assessed for dietary calcium intake.

<sup>e</sup> Partial participants received measurement of baseline 25OHD concentrations.

<sup>f</sup> The RECORD trial reported that the mean baseline 25OHD concentrations for a sample of 60 participants was 15.2 ng/mL, but detailed data were not available for each group.

**supplementary Table 3.** The characteristics of the included studies.
