# Supplementary material for: Comparison of fracture risk using different supplemental doses of vitamin D, calcium or their combination: a network meta-analysis of randomised controlled trials
Source: PubMed Central journal article supplement — BMJ Open. 2019 Oct 16;9(10):e024595. doi: 10.1136/bmjopen-2018-024595 (PMC6797303; doi:10.1136/bmjopen-2018-024595), 2019-10-16
Supplement: bmjopen-2018-024595supp015.pdf [file bmjopen-2018-024595supp015.pdf]

| Source                                              | Treatment |                                                              | No. of Participants |              |                    |
|-----------------------------------------------------|-----------|--------------------------------------------------------------|---------------------|--------------|--------------------|
|                                                     | Duration  | Intervention                                                 | Total Fracture      | Hip fracture | Vertebral Fracture |
| <b>Avenell et al, 2004</b><br>(United Kingdom)      | 3.8 y     | Calcium(1 g/d) (n = 29)                                      | 4                   | 1            | 0                  |
|                                                     |           | D <sub>3</sub> ( 800IU/d) (n = 35)                           | 3                   | 0            | 0                  |
|                                                     |           | Calcium (1g/d) + D <sub>3</sub><br>(800IU/d) (n = 35)        | 2                   | 1            | 0                  |
|                                                     |           | No treatment (n = 35)                                        | 4                   | 1            | 1                  |
| <b>Baron et al, 1999</b><br>(United States)         | 4 y       | Calcium: 1.2 g/d (n = 464)                                   | 4                   | 1            |                    |
|                                                     |           | Placebo (n = 466)                                            | 14                  | 0            |                    |
| <b>Dawson-Hughes et al, 1997</b><br>(United States) | 3 y       | Calcium (0.5g/d) + D <sub>3</sub><br>(700IU/d) (n = 187)     |                     | 0            |                    |
|                                                     |           | Placebo (n = 202)                                            |                     | 1            |                    |
| <b>Grant et al, 2005</b><br>(United Kingdom)        | 2-5 y     | Calcium(1 g/d) (n = 1311)                                    | 166                 | 49           | 3                  |
|                                                     |           | D <sub>3</sub> ( 800IU/d) (n = 1343)                         | 188                 | 47           | 4                  |
|                                                     |           | Calcium (1g/d) + D <sub>3</sub><br>(800IU/d) (n = 1306)      | 165                 | 46           | 0                  |
|                                                     |           | Placebo (n = 1332)                                           | 179                 | 41           | 1                  |
| <b>Hansson and Roos, 1987</b><br>(Sweden)           | 3 y       | Calcium (1g/d) (n = 25)                                      |                     |              | 1                  |
|                                                     |           | Placebo (n = 25)                                             |                     |              | 1                  |
| <b>Harwood et al, 2004</b><br>(United Kingdom)      | 1 y       | D <sub>3</sub> (300000 IU once) (n = 38)                     | 0                   | 0            |                    |
|                                                     |           | Calcium (1g/d) + D <sub>2</sub><br>(300000 IU once) (n = 36) | 6                   | 1            |                    |
|                                                     |           | Calcium (1g/d) + D <sub>3</sub><br>(800IU/d) (n = 39)        |                     |              |                    |
|                                                     |           | No treatment (n = 37)                                        | 5                   | 1            |                    |
| <b>Hin et al, 2017</b><br>(United Kingdom)          | 1 y       | D <sub>3</sub> (4000 IU/d)(n = 102)                          | 6                   |              |                    |
|                                                     |           | D <sub>3</sub> (2000 IU/d)(n = 102)                          |                     |              |                    |
|                                                     |           | Placebo (n = 101)                                            | 1                   |              |                    |
| <b>Jackson et al, 2006</b><br>(United States)       | 7 y       | Calcium (1g/d) + D <sub>3</sub> (400<br>IU/d) (n = 4015)     |                     | 70           |                    |
|                                                     |           | Placebo (n = 3957)                                           |                     | 61           |                    |

|                                                         |           |                                                       |     |    |    |
|---------------------------------------------------------|-----------|-------------------------------------------------------|-----|----|----|
| <b>Lips et al, 1996</b><br><b>(The Netherlands)</b>     | 3-4 y     | 400 IU/d (n = 1291)                                   | 135 | 58 |    |
|                                                         |           | Placebo (n = 1287)                                    | 122 | 48 |    |
| <b>Liu et al, 2015</b><br><b>(China)</b>                | 1 y       | Calcium (1.5g/d) + D <sub>3</sub> (600 IU/d) (n = 50) | 1   |    |    |
|                                                         |           | Placebo (n = 48)                                      | 2   |    |    |
| <b>Mitri et al, 2011</b><br><b>(United States)</b>      | 4 mo      | D <sub>3</sub> (2000 IU/d)(n = 23)                    | 1   |    |    |
|                                                         |           | Placebo (n = 24)                                      | 0   |    |    |
| <b>Peacock et al, 2000</b><br><b>(United States)</b>    | 4 y       | Calcium (0.75g/d) (n = 126)                           |     |    | 7  |
|                                                         |           | Placebo (n = 135)                                     |     |    | 13 |
| <b>Porthouse et al, 2005</b><br><b>(United Kingdom)</b> | 1.5-3.5 y | Calcium (1g/d) + D <sub>3</sub> (800 IU/d) (n = 1321) | 58  | 8  |    |
|                                                         |           | No treatment (n = 1993)                               | 91  | 17 |    |
| <b>Prince et al, 2006</b><br><b>(Australia)</b>         | 5 y       | Calcium (0.48g/d) (n = 730)                           | 110 | 11 | 38 |
|                                                         |           | Placebo (n = 730)                                     | 126 | 6  | 39 |
| <b>Recker et al, 1996</b><br><b>(United States)</b>     | 4 y       | Calcium (1.2 g/d) (n = 95)                            |     |    | 27 |
|                                                         |           | Placebo (n = 102)                                     |     |    | 34 |
| <b>Reid et al, 1993</b><br><b>(New Zealand)</b>         | 4 y       | Calcium (1 g/d) (n = 68)                              | 2   | 0  | 0  |
|                                                         |           | Placebo (n = 67)                                      | 7   | 2  | 1  |
| <b>Reid et al, 2006</b><br><b>(New Zealand)</b>         | 5 y       | Calcium (1 g/d) (n = 732)                             | 134 | 17 | 27 |
|                                                         |           | Placebo (n = 739)                                     | 147 | 5  | 38 |
| <b>Riggs et al, 1998</b><br><b>(United States)</b>      | 4 y       | Calcium (1.6 g/d) (n = 119)                           |     |    | 8  |
|                                                         |           | Placebo (n = 117)                                     |     |    | 9  |
| <b>Salovaara et al, 2010</b><br><b>(Finland)</b>        | 3 y       | Calcium(1g/d) + D <sub>3</sub> (800 IU/d) (n = 1718)  | 78  | 4  | 9  |
|                                                         |           | No treatment (n = 1714)                               | 94  | 2  | 13 |
| <b>Sanders et al, 2010</b><br><b>(Australia)</b>        | 3-5 y     | D <sub>3</sub> (500000 IU every year) (n = 1131)      | 155 | 19 | 35 |
|                                                         |           | Placebo (n = 1127)                                    | 125 | 15 | 28 |
| <b>Smith et al, 2007</b><br><b>(United Kingdom)</b>     | 3 y       | D <sub>3</sub> (300000 IU every year) (n = 4727)      |     | 66 |    |
|                                                         |           | Placebo (n = 4713)                                    |     | 44 |    |
| <b>Trivedi et al, 2003</b><br><b>(United Kingdom)</b>   | 5 y       | D <sub>3</sub> (100000 IU every 4 mo) (n = 1345)      | 119 | 21 | 18 |
|                                                         |           | Placebo (n = 1341)                                    | 149 | 24 | 28 |

|                                                      |     |                                                           |   |   |
|------------------------------------------------------|-----|-----------------------------------------------------------|---|---|
| <b>Uusi-Rasi et al, 2015</b><br><b>(Finland)</b>     | 2 y | D <sub>3</sub> (800 IU/d) (n = 102)                       | 6 | 2 |
|                                                      |     | Placebo (n = 102)                                         | 6 | 0 |
| <b>Witham et al, 2013</b><br><b>(United Kingdom)</b> | 1 y | D <sub>3</sub> (100000 IU every 3 mo)<br>(n = 80)         | 2 |   |
|                                                      |     | Placebo (n = 79)                                          | 3 |   |
| <b>Xue et al, 2017</b><br><b>(China)</b>             | 1 y | Calcium (0.6g/d) + D <sub>3</sub> (800<br>IU/d) (n = 139) | 3 |   |
|                                                      |     | Placebo (n = 173)                                         | 2 |   |

**Supplementary Table 4.** The detailed data of outcomes
