# Supplementary figures and images for: Comparison of fracture risk using different supplemental doses of vitamin D, calcium or their combination: a network meta-analysis of randomised controlled trials
Source: PubMed Central journal article supplement — BMJ Open. 2019 Oct 16;9(10):e024595. doi: 10.1136/bmjopen-2018-024595 (PMC6797303; doi:10.1136/bmjopen-2018-024595), 2019-10-16

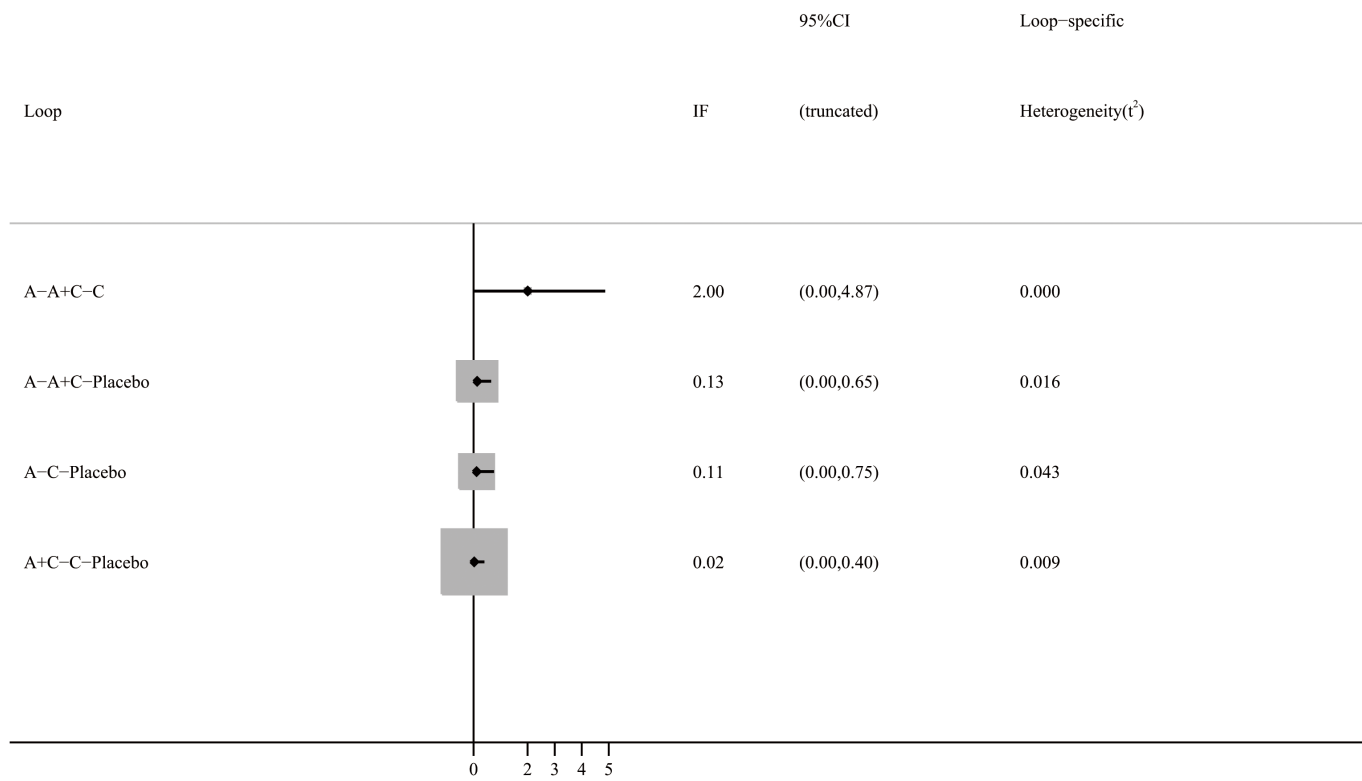

Ö „ 1

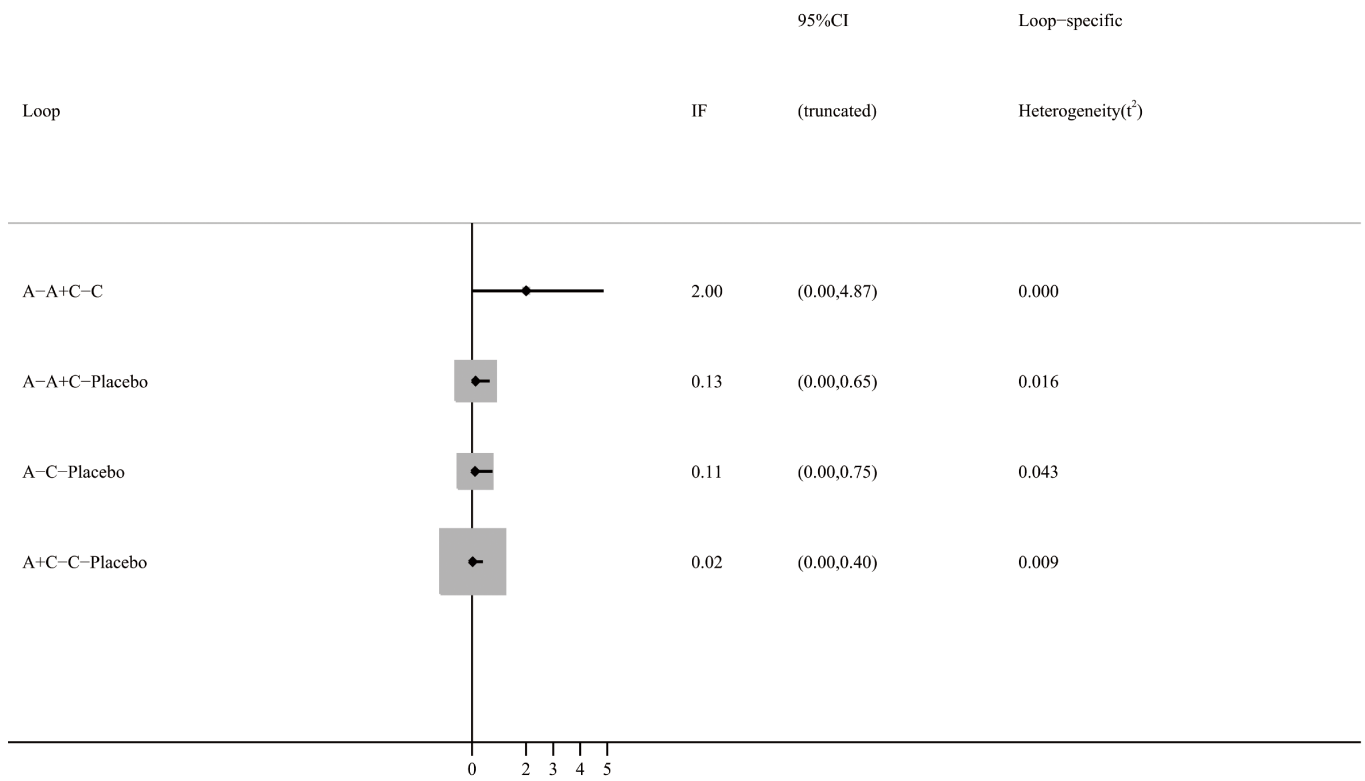

Supplement: bmjopen-2018-024595supp006.pdf [file bmjopen-2018-024595supp006.pdf]

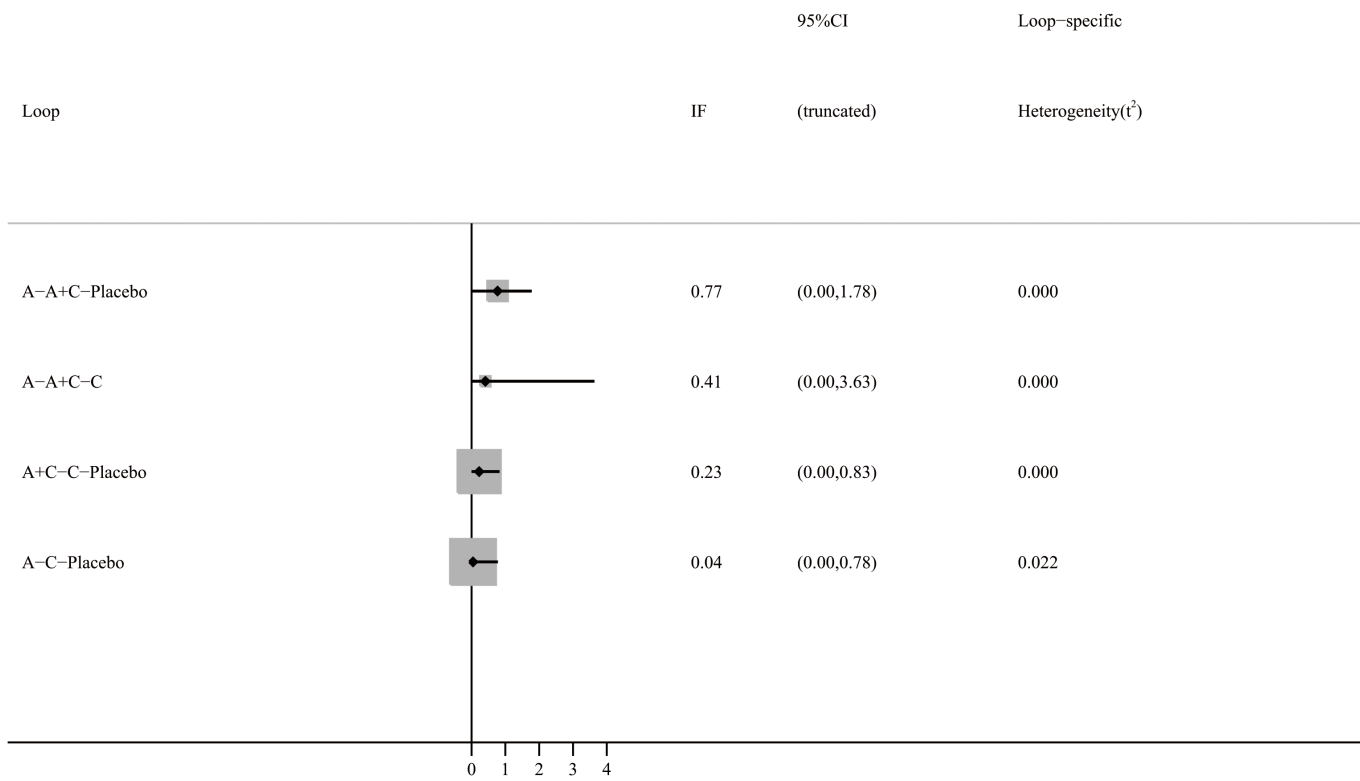

Ö<sup>o</sup> „ 1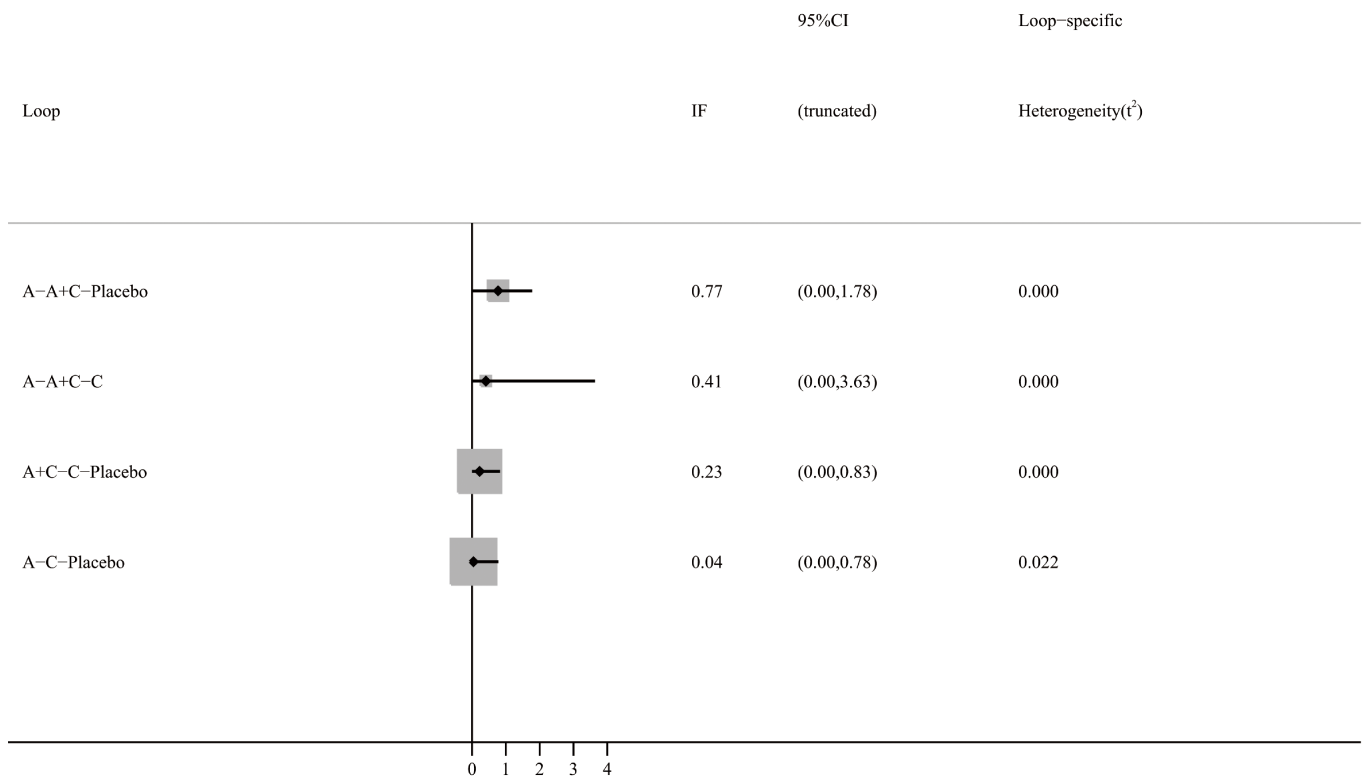

Supplement: bmjopen-2018-024595supp007.pdf [file bmjopen-2018-024595supp007.pdf]

A

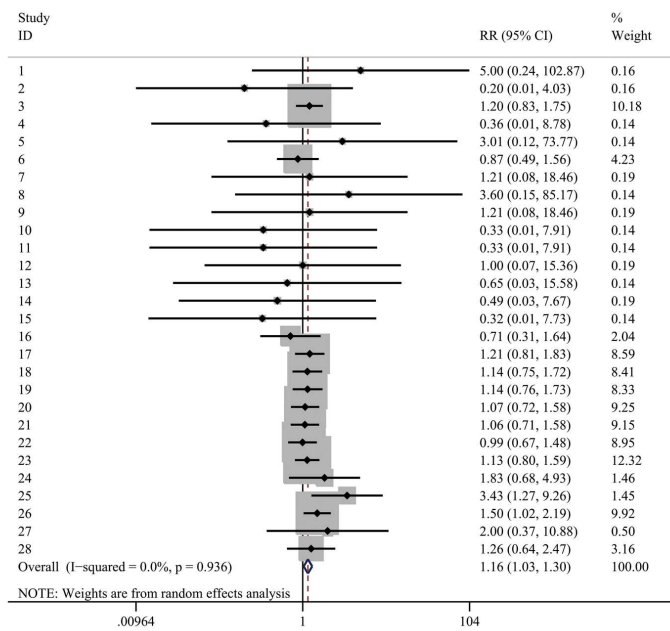

B

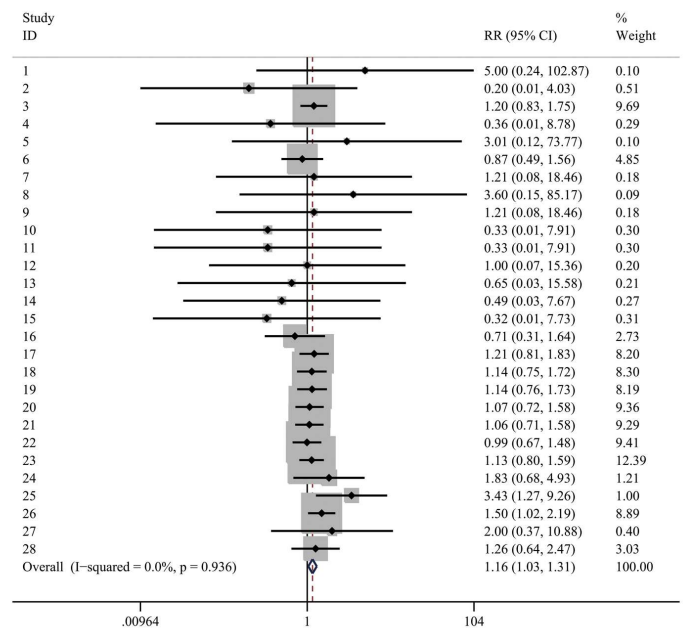

Supplement: bmjopen-2018-024595supp010.pdf [file bmjopen-2018-024595supp010.pdf]

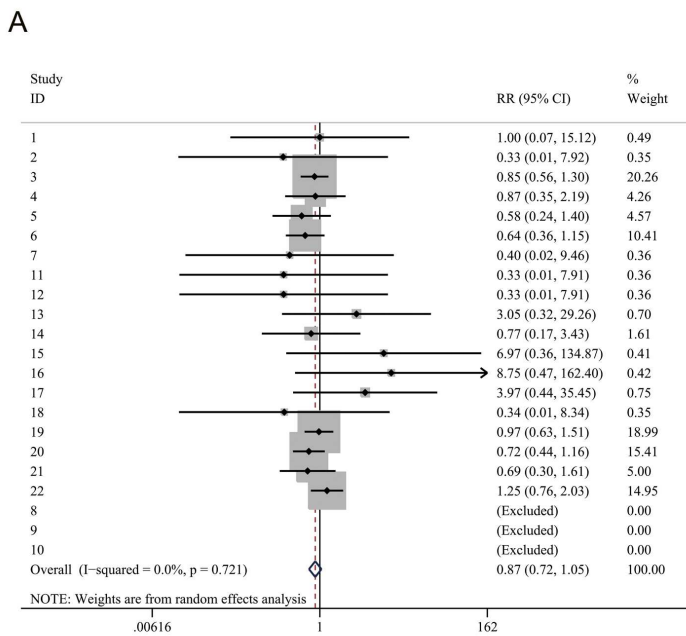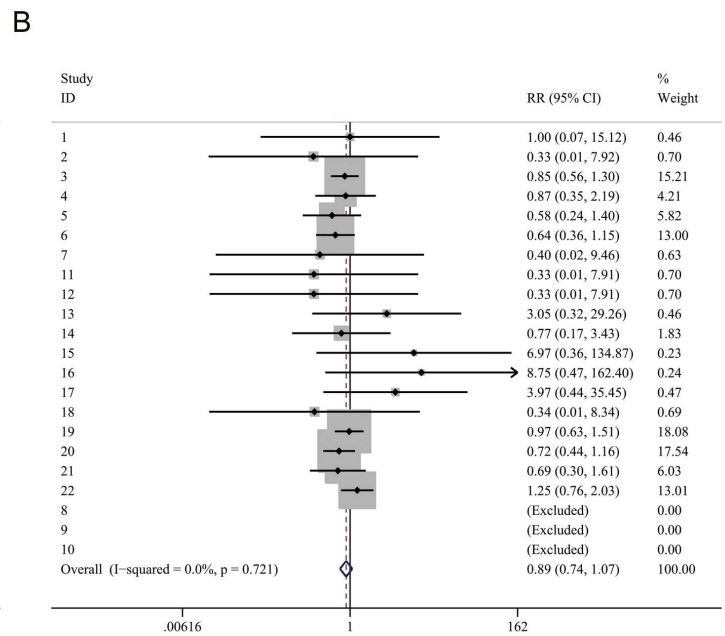

Supplement: bmjopen-2018-024595supp011.pdf [file bmjopen-2018-024595supp011.pdf]
